# Supplementary material for: Insulin/IGF-1 signaling modulation in prefrontal cortex is linked to antisuicidal effects in MDD
Source: Research Square preprint supplement (doi:10.21203/rs.3.rs-5806920/v1), 2025-06-24
Supplement: Supplementary file 1 [file b3047e67a7df79649da0f37e.xlsx]

## Sheet: Contents
Supplementary Tables 5,6,9,10
Supplementary Table 5. Small molecule prioritization scores based on the s1 signature (IRS2, RMND5B) with annotation from L1000 SigCom LINCS Metadata and BBB scores*.
Supplementary Table 6. Small molecule prioritization scores base on the s2 signature (IRS2, RMND5B, DCTN5, CLEC4E) and single-gene signatures with annotation from L1000 SigCom LINCS Metadata and BBB scores*.
Supplementary Table 9. Results of enrichment of small molecule mechanisms of action in the drug prioritization based on s1 (IRS2, RMND5B).
Supplementary Table 10. Results of enrichment of small molecule drug targets in the drug prioritization based on s1 (IRS2, RMND5B).
Supplementary Table 11. Individual-level TWAS results of suicide attempt count.
Supplementary Table 12. Individual-level TWAS results of C-SSRS suicidal behavior.
Supplementary Table 13. Individual-level TWAS results of suicide attempt presence.
*BBB scores were defined using BBB_calculator https://github.com/frequencykg/BBB_calculator by Gupta et al., 2019 (https://doi.org/10.1021/acs.jmedchem.9b01220)

## Sheet: Supplementary Table 5
Supplementary Table 5. Small molecule prioritization scores based on the s1 signature (IRS2, RMND5B) with annotation from L1000 SigCom LINCS Metadata and BBB scores*.
drug	s1	target	moa	BBB score
BRD-K36826042	0.0557703	-	-	3.75809
BRD-A02726762	0.0538784	-	-	2.3075
acetylcholine	0.0517385	-	-	2.5581
BRD-K38385428	0.0503698	-	-	3.83562
BRD-K40155511	0.0498089	HRH1	Histamine receptor antagonist	9.67117
BRD-K02638906	0.0491733	-	-
BRD-K45932120	0.047818	-	-	7.48709
BRD-K51457407	0.047333	-	-	2.66515
MW-STK33-4C	0.0472176	-	-	4.49035
BRD-K58340898	0.046552	-	-	3.64896
BIBR-1532	0.0463512	-	-	3.12446
PF-3845	0.0460341	-	-	5.75139
BRD-K09398529	0.0460243	-	-	3.76806
ZM-336372	0.0457328	-	-	3.5123
BRD-K78915806	0.0455717	-	-	2.23466
BRD-K22387508	0.045347	-	-	2.90728
BRD-A42433574	0.0449762	IDO1	Indoleamine 2,3-dioxygenase inhibitor	4.07126
BRD-K12341671	0.0449201	-	-	7.0211
BRD-K80408519	0.0448494	-	-	3.79462
BRD-K63337793	0.0447491	-	-	3.04443
BRD-K46544760	0.044746	-	-	2.57752
VU-0415108-1	0.0444423
BRD-K29466595	0.0443219	-	-	4.53966
BRD-K57420195	0.0443076	-	-	3.57105
BRD-K69594935	0.0441933	-	-	2.87134
BRD-K26929400	0.0438646	AR	Androgen receptor agonist	7.88016
BRD-K02694971	0.043767	-	-	1.77242
BRD-K15719180	0.0437437	-	-	3.02043
BRD-K24226959	0.0431637	-	-	3.33768
BRD-K71733437	0.043002	-	-	4.45219
deguelin	0.0430015	-	-
efatutazone	0.0427886	-	-	3.22161
BRD-K60216304	0.0426163	-	-	2.37229
BRD-K10882151	0.0425263	-	-	4.31518
BRD-K13428252	0.0424868	-	-	3.01465
BRD-K01359264	0.0423805	-	-	2.37758
BRD-K93800099	0.0423534	-	-	3.12724
BRD-K70875408	0.042304	-	-
NPK76-II-72-1	0.0422499	-	-
BRD-K63375110	0.0422144	-	-	2.20291
BRD-K47417426	0.0421205	-	-	3.20777
BRD-K53943097	0.0419004	-	-	3.78144
BRD-K86694468	0.0416805	-	-	2.09092
BRD-K02206783	0.041585	-	-	3.3573
aniracetam	0.0414124	-	-	1.65886
BRD-K06577881	0.0413495	-	-	2.96538
PF-750	0.0409509	-	-	2.31763
BRD-K93419974	0.0409343	-	-	2.54502
BRD-K19405573	0.0408736	-	-	4.57656
BRD-K97489107	0.0408016	-	-	2.6933
BRD-K51381937	0.0407693	-	-	4.16085
batimastat	0.040683	-	-	3.38151
BRD-K17854785	0.0406565	-	-	6.42236
CCT036477	0.040514	-	-
BRD-K06927120	0.0405075	-	-	3.26125
BRD-K35848924	0.0403892	-	-	2.31318
tetroquinone	0.0402807	-	-
BRD-K65824347	0.0402105	-	-	3.34756
BRD-K89266502	0.0401312	-	-	4.47018
tetramisole	0.0400709	-	-
BRD-K00868395	0.0400489	-	-	2.55924
BRD-K93126086	0.0400068	-	-	2.73902
BRD-A85234536	0.039962	-	-	3.35879
BRD-K21453542	0.0398626	-	-
BRD-K61909412	0.0398418	-	-	5.39649
BRD-K56034970	0.0398057	-	-	1.45585
BRD-K49673270	0.0397647	MAOB	Monoamine oxidase inhibitor	6.66933
MW-MITF9	0.0397548	-	-	4.40099
BRD-K94267488	0.0397295	KEAP1	Kelch-like ECH-associated protein ligand	4.06408
BRD-K00346458	0.0397235	-	-	3.74532
BRD-K06148713	0.0396164	-	-	2.39282
BRD-K55841827	0.0395853	-	-
BRD-K85118298	0.0395845	-	-	7.2271
BRD-K73969016	0.0395531	-	-
BRD-K96761342	0.039537	-	-	3.43476
BRD-K32294814	0.0395282	-	-	3.49566
SKF-77434	0.0395004	-	-	3.97376
BRD-A83255679	0.0394547	-	-	0.869311
BRD-K39674306	0.039275	-	-	4.28101
BRD-K80412673	0.0392526	-	-	3.85283
BRD-K13648806	0.0392445	-	-
BRD-K25380050	0.0392321	-	-	2.36807
BRD-K13673722	0.0392093	-	-
BRD-K37562700	0.0391629	-	-
deoxycorticosterone-acetate	0.0391606	-	-	3.2467
BRD-K06449093	0.0390139	-	-	3.24525
BRD-K14489740	0.038968	-	-
BRD-K23021002	0.0389286	-	-	3.54304
BRD-K24312231	0.0388654	-	-	2.09092
BRD-K08993600	0.0388237	-	-
liothyronine	0.038808	-	-	2.70327
SANT-1	0.0387547	-	-	4.89206
BRD-K01626580	0.0387502	-	-	3.64752
BRD-K46293468	0.0386961	-	-	7.25898
BRD-K18600476	0.0386906	-	-	3.96853
BRD-K47071092	0.0385643	-	-	4.48904
BRD-A43164341	0.0385492	-	-	5.49861
BRD-K29162128	0.0385397	-	-	3.53827
BRD-K36149190	0.0385285	-	-	2.98558
BRD-K17107214	0.0385166	-	-	3.07709
BRD-K49872883	0.0384976	-	-	3.02431
BRD-K18589989	0.0384911	-	-	4.32611
BRD-K61439686	0.038481	-	-
BRD-K49955466	0.0384787	-	-	3.22222
BRD-K57487331	0.0384536	-	-	2.5975
BRD-K83244979	0.0383739	-	-	2.97821
fluprostenol	0.0383685	-	-
BRD-K99048639	0.0383348	-	-	4.50123
BRD-K32656671	0.0383011	-	-	2.23157
BRD-K74663731	0.0382918
rotundine	0.0382476	-	-
BRD-K21009077	0.0382268	-	-	2.5581
ST-4029487	0.0381604	-	-
BRD-K02809100	0.038088	-	-	4.80954
BRD-K76084102	0.0380735	-	-	4.07982
BRD-K67638302	0.0380696	PIK3CA	PI3K inhibitor	3.72218
BRD-K65183353	0.0380289	-	-
BRD-K02206127	0.0380275	-	-	2.30996
BRD-K13234528	0.0379182	-	-	4.18738
BRD-K86483825	0.0378938	-	-	2.4443
enoximone	0.0378633	-	-	3.25487
BRD-K52731958	0.0378392	-	-	9.04938
BRD-K10768305	0.0377922
BRD-K30640165	0.0377677	-	-	4.15419
BRD-K47445962	0.0377443	-	-	3.74736
enzastaurin	0.0377169	-	-
BRD-K17750548	0.0376605	-	-	3.45204
BRD-K82824976	0.0376388	-	-
BRD-K15440898	0.0375694	-	-
BRD-K68202226	0.0375101	-	-	3.5928
BRD-K11528380	0.0374638	-	-	3.04019
BRD-K83025131	0.0374583	-	-	2.5428
SA-1459224	0.0374353	-	-	2.48383
BRD-K57937572	0.0373956	-	-	3.99609
dicyclohexylurea	0.0373933	-	-
BRD-K88541752	0.0373915	-	-	3.87325
BRD-K61551681	0.0373793	-	-	4.24681
BRD-K06403738	0.0372997	-	-	3.19637
BRD-K28700379	0.0372603	-	-	3.71954
veliparib	0.0372288	-	-
BRD-K34580085	0.0372156	-	-	3.62738
BRD-K25942808	0.0371631	-	-
BRD-K67484361	0.0371366	-	-	4.27224
BRD-K03534861	0.0370738	-	-	3.24525
BRD-K83322422	0.0370657	-	-	3.72765
NSC-119889	0.0370356	-	-	3.63595
BRD-K70838368	0.0370269	-	-	1.38065
BRD-K14696368	0.0370043	-	-	7.22009
SA-1457472	0.036999	-	-
BRD-K46726368	0.036964	-	-	3.55011
BRD-K38498572	0.0369498	-	-
BRD-K08009212	0.0369416	-	-	2.7477
myriocin	0.0369266	-	-	8.21177
BRD-K45347683	0.036917	-	-	2.87957
BRD-K03371390	0.0369107	-	-	2.56776
BRD-K62427254	0.0369012	-	-	4.8981
BRD-K05078233	0.0368776	-	-
BRD-K52341452	0.0368674	-	-	3.84171
BRD-K80832690	0.0368418	-	-	6.63585
BRD-K11010670	0.0368404
BRD-K10705624	0.0368338	-	-	3.72979
BRD-K17973355	0.0368169
BRD-K13849015	0.036816	-	-
BRD-K39419290	0.0367916	-	-
BRD-K49662642	0.0367807	-	-	6.2033
RHC-80267	0.036727	-	-	3.80473
BRD-K97624853	0.0367175	CSNK2A2, CSNK2A1	Casein kinase inhibitor	3.06788
metoprolol	0.0367143	-	-	2.98845
disopyramide	0.0367099	-	-	2.56776
BRD-K21509725	0.0366751	-	-	3.37069
BRD-A77328129	0.036669	-	-	3.89866
BRD-K06127304	0.03666	-	-	5.00901
BRD-K31215362	0.0366404	-	-	4.65491
TWS-119	0.0366271	-	-	4.21027
BRD-K35809598	0.036596	PPARA	PPAR receptor agonist	4.85612
BRD-K88748878	0.0365845	-	-
BRD-K84909597	0.0365797	-	-	4.54426
BRD-K92754162	0.0365518	-	-
BRD-K35119180	0.0365404	-	-	3.38564
BRD-K82935485	0.0364658	-	-	3.45699
PF-562271	0.0364638	-	-	3.42152
glipizide	0.0364333	HTR1D, HTR1A	Serotonin receptor antagonist	6.09142
BRD-K95080859	0.0364214	-	-	3.01137
NK42-I-109-1	0.0364103	-	-	2.75913
BRD-K67715154	0.0363429	-	-	1.5538
BRD-K09641113	0.0363122	-	-	4.58393
damnacanthal	0.0363027	-	-	2.71845
BRD-K56593426	0.0362961	-	-	2.59782
BRD-K12017137	0.036263	-	-	4.55121
methyltyramine	0.0362316	-	-	3.45684
BRD-K94397824	0.036223	-	-	3.78955
propofol	0.0361223	-	-	2.19494
benidipine	0.0361126	-	-	1.95065
BRD-K49995660	0.0360588	-	-
BRD-K80679698	0.0360441	-	-	2.93389
BRD-K62153980	0.0360013	-	-	4.57197
totaralolal	0.0359991	-	-	3.80098
BRD-K03937692	0.035992	-	-	3.4221
BRD-K42142217	0.0359843	-	-
BRD-K98481427	0.0359057	-	-	3.30623
BRD-K26694002	0.0359044
BRD-K57519495	0.0358885	-	-	5.51841
BRD-K06912584	0.0358858	-	-	2.63825
BRD-K49723782	0.0358446	-	-	1.17738
BRD-K67862512	0.0358411
BRD-K51185182	0.0358267	-	-	3.59938
BRD-K34311178	0.0358226	-	-	2.31763
BRD-K77800502	0.0358118	-	-	3.08726
cefazolin	0.0357763	-	-	4.06411
delavirdine	0.0357746
BRD-K09523238	0.0357695	-	-	2.04688
BRD-K74109014	0.0357547	-	-	3.29307
EMF-csc-9	0.0357517
BRD-K55835264	0.0357364	-	-	2.15982
BRD-K09253654	0.0357193	-	-	2.87486
BRD-K63468420	0.0357169	-	-
BRD-K23905877	0.0356896	-	-	3.12784
SA-1920013	0.0356743	-	-	3.59486
BRD-K54023716	0.0356595	-	-	3.95216
BRD-K02946901	0.0355787	-	-	2.2582
BRD-K95789946	0.0355723	-	-
BRD-K97399889	0.0355513	-	-	3.12724
BRD-K73837493	0.0354967
BRD-K37515001	0.0354249	-	-	2.21899
bms	0.0354	TLR7, TLR8	Toll-like receptor agonist	3.52017
BRD-A31962514	0.035396	-	-	2.37694
BRD-K67442425	0.0353654	-	-	3.01465
BRD-K27889081	0.0353349	-	-
BRD-K79712504	0.0353335	-	-	6.94673
BRD-K80400482	0.0353332	-	-
BRD-K96295480	0.0352943	-	-	2.6192
BRD-K35133923	0.0352571	-	-	1.34604
BRD-K80101280	0.0352169	-	-	4.08762
BRD-K48338059	0.0352157	-	-	4.23151
BRD-K19710723	0.0352156	-	-	4.2355
BRD-K77719922	0.0351992	-	-	3.5393
BRD-K30684242	0.0351985	-	-
DFCI-LW11	0.0351731	-	-	3.89638
BRD-K89142472	0.0351658
BRD-K51140856	0.0351263	-	-	3.27898
BRD-K12239796	0.0350951	-	-	2.5975
BRD-K83448282	0.035082	-	-	2.60756
BRD-K46162352	0.0350682	-	-	2.15094
BRD-K37616496	0.0350325	-	-	3.01533
ANR-94	0.0350071	GNPTAB	GLCNAC phosphotransferase inhibitor	0.816016
BRD-K08476323	0.0350068	-	-	1.99963
BRD-K50815029	0.0349609	-	-	3.88533
BRD-K56890200	0.0349423	-	-
BRD-K66551929	0.0349373	-	-	4.99122
BRD-K18861610	0.0349364	-	-	3.0312
BRD-K97516320	0.0349288	-	-	6.24605
BRD-K69425327	0.0349151	-	-	5.6806
BRD-K08835142	0.0349022	-	-
BRD-K20470077	0.0348504	-	-
BRD-K19474742	0.0348023	-	-	4.16085
BRD-K54081441	0.0347959	-	-	5.46038
BRD-K56764633	0.0347802	-	-
BRD-K58498516	0.0347401	-	-	1.85052
dosulepin	0.0347346	-	-	2.26876
BRD-K51392039	0.0347333	-	-	4.11855
quetiapine	0.0347246
BRD-K57218099	0.0347126	-	-	3.53225
BRD-K72014243	0.034689	-	-	3.53827
BRD-K21771537	0.0346842	-	-
BRD-A07944983	0.034673	-	-	2.10964
LY-2334737	0.0346704
BRD-K05414181	0.0346196	-	-	8.24533
alda-1	0.0346141	-	-	5.36525
nitrocaramiphen	0.034606	-	-	4.89663
BRD-K11275619	0.0345947	-	-	3.8771
BRD-K54673054	0.0345722
BRD-K33603918	0.0345648	-	-	3.43275
K-02288	0.0345626	-	-	7.74031
BRD-K53548223	0.0345538	-	-
BRD-K70891562	0.0345497	-	-	1.02746
MW-SHH-250	0.0345467	-	-	4.29078
BRD-K18519621	0.0345274	-	-	4.35503
nepafenac	0.0345251	-	-	3.31426
BRD-K55581069	0.034523
dienestrol	0.0345168	-	-	3.80721
bexarotene	0.0344814	-	-	2.8704
BRD-K19965080	0.0344775	-	-	2.90875
BRD-K91836367	0.0344558	-	-	5.89454
BRD-K17885598	0.0344461	-	-	3.39681
BRD-K66733186	0.0344026	-	-
BRD-K98890753	0.0343869	-	-	3.30483
BRD-K73650939	0.0343818
BRD-K49093373	0.0343748	-	-	2.73452
BRD-K48564062	0.0343717	-	-
BRD-K56398628	0.0343498	-	-	1.89882
BRD-K63442512	0.034344	-	-
BRD-K51498721	0.0342878	-	-	3.08033
BRD-K34462187	0.0342739	-	-	3.00793
PNU-74654	0.0342713	-	-	2.53969
BRD-K92399508	0.0342583	-	-	5.99528
SD-208	0.0342312	-	-	3.12724
BRD-K35799753	0.034222	-	-	5.88554
BRD-K57902040	0.034207	-	-	2.49775
TCS-359	0.0341896	-	-	3.82352
BRD-K45043387	0.0341883	-	-	1.91695
BRD-K92791036	0.0341847	-	-
BRD-K90965240	0.0341843	-	-	6.61236
BRD-K63841469	0.0341605	-	-	3.75761
BRD-K52460145	0.0341597	-	-	9.3698
BRD-K05032830	0.0341507	AOC1	Angiotensin converting enzyme activator, DNA intercalator, Topoisomerase inhibitor	2.53802
BRD-K53814023	0.034138	-	-	3.66985
BRD-K92367471	0.0341319	-	-	2.5428
614_7033_4267	0.0341197	-	-	4.03613
BRD-K49460772	0.0341077	-	-
BRD-K13275816	0.034099	-	-	3.84349
BRD-K35639494	0.0340858	-	-	2.00476
BRD-K12936425	0.0340797	-	-	2.23361
BRD-K72051249	0.0340615	-	-	4.34666
BRD-K71253424	0.034047	-	-	2.76189
BRD-K96625719	0.0340245	-	-	4.72207
BRD-K60830482	0.0340063	DHODH	Dihydroorotate dehydrogenase inhibitor, PDGFR inhibitor	4.68436
BRD-K01241136	0.0339946	-	-	2.36745
BRD-K94469522	0.0339941	-	-	2.99536
BRD-K99155518	0.03396	-	-	4.20876
BRD-K50078508	0.0339307	-	-	3.06573
BRD-K40220562	0.0339268	GLRA3	Glycine receptor antagonist, Acetylcholine receptor antagonist	4.79883
BRD-A12822115	0.0339034	-	-	3.55016
BRD-K60543885	0.033898	-	-	1.47071
BRD-K36513323	0.0338918	-	-	2.56497
BRD-K75666689	0.0338753	-	-	4.85436
BRD-K62771975	0.0338457
BRD-K41957723	0.033843	-	-	3.98029
BRD-K84432438	0.0338248	-	-
AS-604850	0.033801	-	-	4.63585
BRD-K12925598	0.0337873	-	-	1.74141
BRD-K64182862	0.0337851	-	-
BRD-K31129604	0.0337841	-	-	3.82536
BRD-K61627029	0.0337743	-	-
BRD-K28293491	0.0337597	-	-	3.80551
fenigam	0.033731	-	-	4.26288
BRD-K99660708	0.0337254	-	-	1.97155
BRD-K78656517	0.0337111	-	-	2.90875
BRD-K31096204	0.033698
BRD-K77011363	0.0336976	-	-	3.92749
BRD-K92374432	0.0336805	-	-	5.20162
BRD-K04078927	0.033657	-	-	3.02517
BRD-K65441343	0.0336546	-	-	3.13286
BRD-K51106827	0.0336502	-	-	2.47974
BRD-K53475565	0.0336476
BRD-K54637865	0.0336471	-	-	3.24553
BRD-K64668459	0.0336425	-	-	4.32607
BRD-K59204160	0.0336374	-	-	3.78696
BRD-K37696710	0.0336323	-	-	6.6545
BRD-K03935681	0.0336082	-	-	2.55924
CTPB	0.0335952	-	-	1.8707
BRD-K09166899	0.033546	-	-	3.84869
alogliptin	0.0335395	-	-	4.27331
FK-866	0.0335302	-	-	4.1952
BRD-K66577743	0.0335255	PIM1, FLT3, PIM2, PIM3	Pim kinase inhibitor	4.62875
BRD-K67628477	0.0334447	-	-
BRD-K16238077	0.0334293	-	-
hemado	0.0334257	-	-	4.44906
BRD-K75325409	0.0334145	NR3C1	Glucocorticoid receptor agonist	2.53936
BRD-K98842254	0.0334137	-	-	6.62742
BRD-K10136726	0.0334117	-	-	2.50901
BRD-K09290524	0.0333929	-	-	3.93016
solanine	0.0333919	-	-
BRD-K26479796	0.0333547	-	-	2.63832
BRD-K23430405	0.0333476	-	-	2.02284
EMF-sumo1-5	0.0333266	-	-	6.2974
BRD-K52436508	0.0332967	-	-	3.18008
KIN001-266	0.0332959	-	-	3.53821
BRD-K89216747	0.0332754	-	-	5.85809
BRD-K98834499	0.0332736	-	-
BRD-K95323755	0.0332587	-	-	3.99909
HC-030031	0.0332455	-	-	4.51418
BRD-K57026098	0.0332164	-	-	4.94258
denbufylline	0.0332132	-	-	2.15278
BRD-K72356321	0.0332113	-	-	1.71899
BRD-A43087975	0.0331886	-	-	2.90506
BRD-K87920770	0.0331637	-	-	5.05588
BRD-K73227539	0.0331312	-	-	6.3907
BRD-K12896711	0.0331299	-	-	5.75139
BRD-K67863009	0.0331155	-	-	3.14771
BMS-777607	0.0331081	-	-	2.6359
BRD-M45755366	0.0331064	-	-	3.1872
BRD-K10459843	0.0330912	-	-
BRD-K86757617	0.033054	-	-	2.3727
BRD-K91593159	0.0330453
BRD-K29936219	0.0330448	-	-	3.29469
BRD-A08820802	0.0330365	NR3C1	Glucocorticoid receptor agonist	1.39433
BRD-K93296644	0.0330331	KDM1A, MAOA, MAOB	Monoamine oxidase inhibitor	7.68428
isradipine	0.0330214	-	-	1.34997
BRD-K87080232	0.032988	-	-	1.3376
BRD-K22789789	0.0329833	-	-	3.6957
AMG-232	0.0329624
BRD-K39029546	0.032947	-	-	3.38564
BRD-K23609283	0.032922	-	-	2.26008
icosapent	0.032918	-	-	3.03845
harmane	0.0329178	-	-	6.6297
hymecromone	0.0329155	-	-	3.22902
epibatidine	0.0329029	-	-	2.07554
hydroquinine	0.0329007	-	-	3.3145
BRD-K28810861	0.0328904	-	-
tacrine	0.0328481	-	-
BRD-K33012050	0.0328452	-	-	3.35946
BRD-K36018407	0.0328442	-	-	4.26882
BRD-K05041276	0.0328366	-	-
diclofenamide	0.0328326	-	-
FGFR3_FBS	0.0328194	-	-	2.25361
BRD-K28589277	0.0327922	-	-	4.07743
iproniazid	0.0327843	-	-
BRD-K86956630	0.0327836
BRD-K32485819	0.0327642	-	-	4.54782
BRD-K20847739	0.0327634	-	-	3.18898
BRD-K06157545	0.0327619	-	-	3.74532
ST-059620	0.0327524	-	-	3.5928
BRD-A17043706	0.0327327	-	-	4.07305
halofantrine	0.0327295	-	-	4.02372
BRD-K89284683	0.0327235	-	-	3.2688
BRD-K29642604	0.0326739	-	-	3.86878
BRD-K88080911	0.0326653	-	-	3.58571
BRD-K78276903	0.0326445	GRIN2B, GRIN1	Adrenergic receptor antagonist, Glutamate receptor antagonist	8.47235
BRD-K43000271	0.0326389	-	-	3.37553
betulinic-acid	0.0326285	-	-	4.38222
BRD-K95963125	0.0326141	-	-	3.83562
BRD-K26048698	0.03259	-	-	5.22203
BRD-K95273033	0.0325888	DRD2, ADRA1A, HTR1A, HTR2A, HRH1, DRD3, HTR2C, HTR1D, DRD4, ADRA1B	Dopamine receptor antagonist, Serotonin receptor antagonist	4.46098
BRD-K87226815	0.032554	AURKA, AURKB	Aurora kinase inhibitor	3.30687
BRD-K81954791	0.0325479	-	-	2.56912
BRD-K16256442	0.0325348	-	-	4.45215
BRD-K63270290	0.0325222	-	-
BRD-K22812176	0.0324962	NR3C1	Glucocorticoid receptor agonist	2.39687
BRD-K89912164	0.0324855
BRD-K08995965	0.0324736
BRD-K63892351	0.0324468	-	-	3.18494
BRD-K71166745	0.0324464	-	-	3.49782
BRD-K47811236	0.0324448	-	-	5.46078
BRD-K96194181	0.0324419	-	-	3.00882
BRD-K99529078	0.0324401	-	-
BRD-K31749518	0.0324376	-	-	3.12902
BRD-K09170549	0.0324323	-	-	3.10636
BRD-K55981249	0.0324198	-	-	2.17807
BRD-K95392673	0.0324033	-	-	3.12724
BRD-K76755209	0.0323866	-	-	4.59573
pinitol	0.0323821	-	-	3.31644
BRD-K64302818	0.0323768	-	-	3.99609
BRD-K63086103	0.0323748	-	-
BRD-K14263251	0.0323677	-	-	2.53969
BRD-K71540055	0.0323537	-	-	2.87129
BRD-K12034365	0.0323408	-	-	4.54696
CO-101244	0.0323391	-	-	3.25831
BRD-K00918977	0.032333	-	-	8.22962
BRD-K76023734	0.0323293	-	-	3.08729
SA-1922261	0.0323226	-	-	3.25483
enflurane	0.0323214	ABL1, BCR	Abl kinase inhibitor	2.17017
BRD-K01497006	0.0323149	-	-	5.94715
BRD-K77326001	0.032312	-	-	2.68829
BRD-K79410674	0.0323119	-	-	4.22816
nilvadipine	0.0322919	-	-	3.45468
BRD-K18527484	0.0322866	-	-
BRD-K20530300	0.0322828	-	-
ICI-63197	0.0322786	-	-	3.02043
BRD-K46965430	0.0322782	-	-	4.05891
BRD-K11826883	0.0322747	-	-
BRD-K72692763	0.0322746	-	-	3.62742
BRD-K58698092	0.0322738	-	-	4.09251
BRD-K73928524	0.0322608	-	-	4.32284
BRD-K99383477	0.0322154	-	-	8.04199
BRD-K32759520	0.0322143	-	-	3.4055
BRD-K02537686	0.0322096	ABCC8	ATP channel blocker	4.38628
BRD-K25709301	0.0321851	-	-	3.6582
BRD-A70731303	0.0321795	-	-	2.24126
BRD-K14392329	0.0321794	-	-	3.0686
BRD-K80171496	0.0321697	-	-	4.07186
BRD-K13798725	0.0321651	RARB	Retinoid receptor agonist	4.36572
BRD-K44086628	0.0321258	-	-	2.3531
BRD-K39963927	0.0321207	-	-	5.0194
eprosartan	0.0321193	-	-	3.32916
BRD-K56253099	0.0321173	-	-
BRD-K98969488	0.0321116	-	-	1.36254
BRD-K82195532	0.032017	-	-	6.26505
BRD-K74176533	0.032009	-	-	3.1085
BRD-K05125666	0.0319933
BRD-K88671928	0.0319763	-	-	5.20663
BRD-K77620628	0.031975	DHFR	Dihydrofolate reductase inhibitor	1.36434
acronycine	0.031975	-	-	4.80954
BRD-K38092925	0.031969	-	-	2.35647
BRD-K95656102	0.0319633	-	-	3.77276
BRD-A82976259	0.031957	-	-	4.11667
BRD-K98889734	0.0319467
BRD-K40494117	0.0319427	ATP2A1	ATPase inhibitor	4.43534
leucodin	0.0319339	ESR2, ESR1	Estrogen receptor antagonist	4.69052
BRD-K25600773	0.0319131	-	-	1.84863
VUF-5681	0.0318792	-	-	3.43301
BRD-K11238413	0.0318474	-	-
BRD-K77504251	0.031843	-	-	6.35087
ostarine	0.0318175	-	-
BRD-K41354272	0.0318083	-	-	3.50255
BRD-K21866464	0.0318033	-	-
BRD-K16136457	0.0317838
BRD-K61161989	0.0317602	-	-	2.92075
BRD-K67094066	0.0317589	-	-
BRD-K84949119	0.0317464	-	-
BRD-A89575866	0.0317326	-	-	4.39478
BRD-K93472147	0.031726	-	-
BRD-K11480730	0.0317202	-	-	2.25094
BRD-K72034944	0.0316984	-	-
BRD-K24422491	0.0316941	-	-	4.40099
BRD-K54067431	0.0316867	KCNJ11	Potassium channel activator	4.38505
BRD-K07689069	0.0316858	-	-
clozapine	0.0316663	-	-	2.36807
BRD-K78388870	0.031662	-	-	2.50414
BRD-K38599483	0.0316601	-	-	4.17313
BRD-K45058172	0.0316536	-	-	4.21087
ramelteon	0.0316501	-	-	2.80569
BRD-K21317335	0.0316479	-	-	4.96817
BRD-K72529818	0.0316379	-	-	3.00448
BRD-K66687431	0.031635	-	-	3.39435
BRD-K44582497	0.0316335	APEX1	APEX inhibitor	4.505
BRD-K20016759	0.0316202	-	-	2.16307
BRD-K18290923	0.0315998	-	-	2.51642
IOX2	0.0315825	-	-	1.84514
BRD-A78355490	0.0315589	-	-
nystatin	0.0315586	-	-	1.90363
BRD-K97263385	0.0315249
BRD-K66803141	0.0315213
BRD-K02839126	0.0315194	HTR2B, HTR2A, HTR2C	Serotonin receptor antagonist	4.15881
BRD-K43029808	0.031508	-	-	3.42064
BRD-K67891857	0.0315036	-	-	4.41988
BRD-K76321890	0.0315029
BRD-K93460493	0.0314934	-	-	4.75384
BRD-K56223790	0.0314879	-	-
BRD-K20138377	0.0314751	SLC6A9	Glycine transporter inhibitor	3.89964
BRD-A05823365	0.0314692	-	-	4.01051
BRD-K07895476	0.0314373	-	-	4.40508
BRD-K81249836	0.031433	-	-
BRD-K61127355	0.0314322	-	-	2.12098
ML-204	0.0314276	-	-	2.8281
BRD-K37344040	0.0314179	-	-
BRD-K70860307	0.0314111	-	-
ampicillin	0.0313964	NR3C1	Glucocorticoid receptor agonist	1.39305
BRD-K58469266	0.0313893	-	-
hydroxyurea	0.0313826	-	-	3.53827
BRD-K54079231	0.0313769	-	-	3.8673
BRD-K63921140	0.0313761	-	-	4.64487
BRD-K13007223	0.0313747	-	-
BRD-K52595962	0.0313721	-	-
BRD-K20329507	0.0313649	PPP2CA, PPP1CA	Protein phosphatase inhibitor	0.816016
BRD-K86774687	0.0313648	-	-	3.12505
THZ-2-98-01	0.0313602	-	-	3.36482
BRD-K54657957	0.0313555	-	-	4.21759
BRD-K96238295	0.0313349	-	-
BRD-K29898553	0.0313246	-	-	4.34816
BRD-K14654869	0.0313194	-	-
BRD-K88762178	0.0313149	-	-	6.25871
LX-1031	0.0313116	-	-	2.83957
acitretin	0.0312993	-	-
BRD-K01568615	0.0312989	-	-	3.23258
BRD-K51843685	0.0312941	-	-	3.31177
BRD-K10148216	0.031292	-	-
BRD-K86344535	0.0312437	-	-	2.95018
BRD-K19608763	0.0312418	-	-	3.56395
BRD-K62758843	0.0312404	-	-	5.77637
BRD-K61439332	0.0312242	-	-	3.63245
BRD-K58469385	0.0312129	-	-	3.14048
BRD-K51019170	0.0311925	-	-	2.24056
eliprodil	0.031191	CLCNKA, PTGS2	Cyclooxygenase inhibitor	4.09586
BRD-K87166736	0.0311272	-	-	3.82157
BRD-K03254663	0.0311255	-	-	1.71899
BRD-K46396728	0.0311229	-	-	2.40634
AR-A014418	0.0311211	ADRB1, ADRB2	Adrenergic receptor antagonist	3.08328
BRD-K14538540	0.0311206	-	-	3.75937
BRD-K58220038	0.031115	-	-	3.14138
BRD-K70210716	0.0310858	-	-	3.26369
BRD-K36203049	0.0310433	-	-	3.81721
BRD-K53783288	0.031026	-	-	2.6007
BRD-K08388529	0.0310226
BRD-K98089885	0.0310225
BRD-K03191078	0.0310199	-	-	3.75335
BRD-K05135707	0.0310069	-	-	3.24061
BRD-K55884477	0.0310015
BRD-K32380790	0.0309991	-	-
BRD-K03791970	0.0309804	-	-
BRD-K35719087	0.0309668	-	-	3.8081
BRD-K62993927	0.0309629	-	-	3.12724
BRD-K41440211	0.0309619	-	-	3.35074
dinaciclib	0.0309514	-	-	3.5393
BRD-K61148205	0.0309466	-	-	3.97591
BRD-K63401627	0.0309242	-	-	4.11316
BRD-K68102868	0.0309223	-	-	4.10815
BRD-K00591281	0.0308957	-	-	2.91263
BRD-K22584556	0.0308925	-	-	2.5975
BRD-K13941052	0.0308713	-	-	3.2554
BRD-K19340473	0.0308693	-	-	1.71321
BRD-K22875057	0.0308612	-	-	5.07035
talniflumate	0.0308512	-	-	3.74786
BRD-K52423731	0.030848	-	-
BRD-K23038591	0.0308416	-	-	2.5975
BRD-K29655991	0.0308367	-	-	1.57848
BRD-A85231803	0.0308316	-	-	7.92956
BRD-A33442372	0.0307837	-	-	3.37282
BRD-K04980212	0.0307598	-	-
ST-014366	0.0307557	-	-
BRD-K18982118	0.0307506	SRD5A2, SRD5A1	5 alpha reductase inhibitor	3.88363
BRD-K56274797	0.0307488	-	-	4.95139
BRD-A74983348	0.0307397	-	-	4.12571
BRD-K39936803	0.030736
BRD-K95875837	0.030728	-	-	3.91878
BRD-K94258680	0.0307208	-	-	4.20871
BRD-K90061492	0.0307008	-	-	3.55403
CGP-53353	0.0307006	-	-	3.38564
abiraterone	0.0306969	-	-	3.22856
BRD-K21936026	0.0306849	-	-	2.52834
BRD-K21987633	0.0306795	-	-	3.12724
BRD-K90256762	0.030674	-	-	3.45454
BRD-K78074905	0.0306484
robustic-acid	0.0306461
BRD-K90041565	0.0306211	-	-
BRD-K16344244	0.0306176
BRD-K20288742	0.0306151	-	-	2.61199
BRD-K89843224	0.0306103	-	-	4.42327
STK-674938	0.0306024	-	-	4.72215
BRD-K42475945	0.0305863	-	-	7.0211
BRD-K77422873	0.0305852	-	-	3.3917
WP-1130	0.0305732	-	-
BRD-K99944604	0.0305677	-	-	7.41902
BRD-A37645929	0.0305626	-	-	3.8731
BRD-K59841546	0.0305587	-	-	3.54753
BRD-K47826846	0.0305436	-	-	1.86041
BRD-K66187495	0.0305209	-	-	4.37524
BRD-K69492024	0.0305179	-	-	2.90678
BRD-K57037351	0.0304993	HRH1, KCNH2	Histamine receptor antagonist	7.89074
BRD-K15892609	0.0304814	-	-
clonazepam	0.0304639	-	-	2.00311
BRD-K04632192	0.0304305	-	-	3.29335
cobicistat	0.0303928	-	-	4.30302
BRD-K22384978	0.0303843	-	-	6.03402
BRD-K70695911	0.0303636	-	-	2.73452
BRD-A31916785	0.0303586	-	-	5.08381
dofequidar	0.030312	-	-	4.16356
BRD-K00505809	0.0302911	-	-	4.16551
BRD-K38681012	0.0302904	-	-
BRD-K98739056	0.0302843	-	-	2.87739
felbinac	0.0302784	-	-	5.45469
ketamine	0.0302599	-	-	3.77311
BRD-K52094743	0.0302438	-	-	3.43301
BRD-K58644442	0.030242	-	-	1.51876
phenserine	0.0302275	-	-	2.72734
BRD-K34232791	0.0302222	-	-	3.00359
BRD-K94035551	0.0302163	-	-
BRD-K48241951	0.0301967
BRD-K05745800	0.0301501	-	-	1.81945
BRD-K50580743	0.0301407	-	-	3.63587
BRD-K23664196	0.0301167	-	-	3.38564
BRD-K45569026	0.030114	-	-	3.48729
BRD-K56126872	0.0301038	-	-	4.77022
BRD-K02258558	0.0301011	-	-
BRD-K00892322	0.0300983	-	-	2.25565
BRD-K45713168	0.0300751	-	-	4.60691
BRD-K22384464	0.0300677	-	-	3.86099
BRD-K53067088	0.0300531	-	-	4.46442
BRD-K12929741	0.0300486	-	-	3.45183
BRD-K48389518	0.0300457	-	-	2.03237
BRD-K56013842	0.0300288	-	-	3.63903
BRD-A94494639	0.030023	-	-	3.03845
BRD-K04021565	0.0300022	-	-	3.0536
BRD-K92655621	0.030002	-	-	3.26074
BRD-A20242387	0.0299931	-	-	7.72144
BRD-K59974052	0.0299906	-	-
BRD-K74192638	0.0299828	-	-	4.09917
BRD-K80535598	0.0299804	-	-	4.15117
BRD-K91490997	0.0299783	-	-	4.69072
BRD-K39507473	0.0299754	-	-	0.199399
BRD-K35101110	0.0299724	-	-	3.44082
motesanib	0.0299713	-	-	3.39737
BRD-K49156662	0.0299701	-	-
BRD-K79619334	0.0299578	-	-	5.39194
BRD-K47841020	0.0299523	-	-	2.49702
BRD-K90762344	0.0299438	-	-	1.70275
fluocinolone	0.0299423	-	-	2.82702
BRD-A77697958	0.0299383	-	-	2.77005
ornidazole	0.0299382	-	-	3.48325
BRD-K86623758	0.0299311	-	-	3.12724
diphenyleneiodonium	0.0299294	-	-	7.02953
BRD-K58404149	0.0299269	-	-	4.6588
BRD-K57059449	0.029903	-	-	2.40102
BRD-K24781739	0.029893	-	-	3.39785
BRD-K30013451	0.0298872	-	-
BRD-K85861721	0.029884	-	-	4.19671
BRD-K46185480	0.0298822	-	-
BRD-K26569518	0.0298779	-	-
BRD-K53912655	0.0298667	-	-
BRD-K70170026	0.0298627	-	-	3.99694
BRD-K69310574	0.0298589	-	-	4.59986
BRD-K61793536	0.0298559	-	-	3.06167
etomoxir	0.0298519	-	-	2.75115
BRD-K53255530	0.0298511	-	-
BRD-K01570637	0.0298501	-	-	2.90568
BRD-K67458784	0.0298412	-	-	3.74443
BRD-K75944637	0.0298397	-	-	2.607
BRD-K96619480	0.0298394	-	-	2.83045
BRD-K65891102	0.0298394	-	-
BRD-K68424387	0.0298359	-	-	3.3917
BRD-K93996655	0.0298148	-	-
BRD-K55806039	0.0298097	-	-	3.63081
dalcetrapib	0.0297975	-	-	1.9864
BRD-K40328231	0.0297937
carbendazim	0.0297931	-	-
SA-1922932	0.0297761	-	-
BRD-K21364577	0.0297758	-	-	4.28506
SNS-314	0.0297713	-	-	3.28617
oxaprozin	0.0297605	-	-
BRD-K18321170	0.029756	-	-	3.0267
riboflavin	0.0297476	-	-	3.34218
BRD-K26559753	0.0297387	AHR	Aryl hydrocarbon receptor agonist	1.19393
BRD-K31059159	0.0297358	CHEK1	CHK inhibitor	2.36476
BRD-K82071478	0.0297329	-	-	3.08506
beta-CCP	0.0297275	-	-	2.00113
BRD-K12067499	0.0297264	-	-	6.4701
BRD-K43628610	0.0297215	-	-	2.42714
BRD-K04669648	0.0297164	-	-	2.77005
BRD-K07208716	0.0297154	-	-
BRD-K35400569	0.0297124	-	-	2.38849
BRD-K83393282	0.0297123	-	-	2.54962
BRD-K99807388	0.0297028	-	-	2.69326
BRD-K49424866	0.0296956	-	-
BRD-A88237615	0.0296906	TOP1	DNA binding agent	4.24498
BRD-K62450654	0.029688	-	-	1.81565
BRD-K47116958	0.0296878	-	-	4.147
BRD-K08941280	0.0296651	OPRD1	Opioid receptor antagonist	5.57748
purvalanol-b	0.0296614	HRH1, HRH3	Histamine receptor agonist, Histamine receptor antagonist	6.15475
ganaxolone	0.0296483	-	-	2.42549
WZ-3105	0.0296469	-	-	4.56589
BRD-K48918097	0.0296446	-	-	2.6954
BRD-K37478894	0.0296433	CSNK2A1	11-beta-HSD1 inhibitor	3.69432
BRD-K62814224	0.0296361	-	-	3.38938
BRD-K91467861	0.0296332	-	-	3.93848
BRD-K92008394	0.0296313	-	-	4.46041
BRD-K19031214	0.0296245	-	-
BRD-K94843767	0.0296052	-	-	2.35042
BRD-K14493775	0.0296001	-	-	3.81772
BRD-K79983157	0.029591	-	-	3.45676
BRD-K31427141	0.0295902	-	-	3.38564
FR-139317	0.0295839	-	-	1.9192
menatetrenone	0.0295834	-	-
BRD-K72219469	0.0295611	-	-	4.07521
BRD-K30855709	0.0295502	-	-	1.64927
BRD-K77273736	0.029549	-	-	1.56859
BRD-K07438795	0.0295432	RORC	ROR antagonist	6.99684
CS-917	0.0295374	-	-	7.023
BRD-K52152765	0.0295325	-	-	3.28617
BRD-K42232544	0.0295299	-	-	3.75405
BRD-K22135724	0.0295166	-	-	4.19527
BRD-K77053712	0.0295163	-	-	3.71649
BRD-K35909757	0.0295124	-	-
BRD-K52231520	0.0295123	-	-	4.00294
BRD-K34086616	0.0295059	-	-	7.41532
BRD-K03235359	0.0294978	-	-
mead-acid	0.0294939	-	-	4.83268
BRD-K05519665	0.0294867	-	-	2.66819
zoledronic-acid	0.0294806
BRD-K84864079	0.0294707	-	-	4.92531
BRD-K31081052	0.0294568	-	-	3.27926
BRD-K77537540	0.0294403	-	-	3.89743
BRD-K43782839	0.0294224	-	-	3.45684
ST-014075	0.029407	-	-	1.70873
BRD-K93486666	0.0294018
BRD-K78828094	0.0293937	-	-	3.9277
BRD-K79596575	0.0293922
BRD-K35324337	0.0293894	-	-	2.57752
fosfomycin	0.029378	-	-
BRD-K20754058	0.0293701	-	-	2.64665
BRD-K49630774	0.0293629	-	-	1.73873
BRD-K68945047	0.029352	-	-	3.81612
BRD-A47798787	0.0293396	-	-
BRD-K09146396	0.0293308	-	-	3.37349
BRD-K01283689	0.0293129	-	-
BRD-K03725349	0.0293097	-	-	1.03738
saha	0.0293063	-	-	1.9868
tenoxicam	0.0292767	-	-	4.33789
BRD-K24383920	0.0292751	-	-	2.77355
troglitazone	0.0292736	-	-	2.80744
BRD-A65592966	0.0292605	HSP90AB1, HSP90AA1	HSP inhibitor	2.88543
trametinib	0.0292589	-	-	6.05694
BRD-K76439996	0.0292521	-	-	4.00147
BRD-K50010596	0.0292501	RYR1	Calcium channel blocker	1.33908
BRD-K64567246	0.0292473	-	-	3.75192
BRD-K98607641	0.0292444	-	-	3.65943
BRD-K24578841	0.0292362	-	-	2.2257
BRD-K09721398	0.0292169	-	-	6.97181
BRD-K73261251	0.0292139	-	-	3.24153
BRD-K05841284	0.0292111	-	-	3.32186
BRD-K15028327	0.0292024	ITGA2B, ITGB3	Platelet aggregation inhibitor	1
BRD-K97540907	0.0292001	-	-	2.90728
BRD-K62599086	0.0291892	-	-	3.14476
BRD-K95041551	0.0291839	-	-	3.10981
BRD-K31030467	0.0291834	-	-	4.38431
BRD-K92023938	0.0291706	-	-	1.65686
BRD-K94766424	0.0291676	-	-	4.73542
BRD-K83898323	0.0291609	-	-	3.13142
BRD-K09879686	0.0291588	-	-	3.38279
BRD-K11442063	0.029137	-	-	3.20405
lorazepam	0.0291353	FDPS	Osteoclast inhibitor, Bone resorption inhibitor	1.99963
BRD-K71879957	0.0291278	-	-	3.78399
BRD-K09487323	0.0291094
BRD-K94196749	0.0291014	-	-	3.63567
BRD-A09243694	0.0290997	-	-	3.45359
BRD-K26836050	0.0290935	-	-	3.76956
BRD-K60772078	0.0290892	-	-
BRD-K62990480	0.0290817	-	-	1.30511
BRD-A67508925	0.0290799	-	-
MDL-29951	0.0290796	-	-	6.87447
BRD-K49675259	0.0290731	-	-	3.19294
ebelactone-b	0.0290666	-	-	3.106
galangin	0.0290655	-	-	2.88501
BRD-K87277021	0.0290628	-	-
BRD-K12916986	0.029061	-	-	6.02722
BRD-K56520530	0.0290599	-	-	4.08711
citalopram	0.0290562	-	-
BRD-K50641952	0.0290559	-	-	1.87957
BRD-K15523383	0.0290491	-	-	3.61
BMS-387032	0.0290461	-	-
BRD-K64317740	0.0290374	-	-	2.93266
BRD-K17886576	0.0290319
BRD-K06432680	0.0290249	-	-
BRD-K96491043	0.0290048	-	-	2.86317
BRD-K97116995	0.0290021	-	-
BRD-K23960050	0.0289877	-	-	2.41246
BRD-K81799166	0.0289836	-	-	3.10981
BRD-K77343050	0.0289629	-	-	2.35587
BRD-K35046689	0.0289557	-	-	3.73319
BRD-K84790105	0.0289461	-	-	2.96874
BRD-K86715767	0.0289417	-	-
BRD-K35491869	0.0289381	-	-
BRD-K61033289	0.0289132	-	-	3.70387
WZ-4002	0.0289129	-	-	3.80473
BRD-K74968522	0.0289052	SLC18A1, SLC18A2	Catecholamine depleting sympatholytic	1.67622
BRD-K59518944	0.0288961	-	-	3.78788
BRD-K81522184	0.0288876	-	-	2.957
BRD-K81757081	0.0288838	-	-	4.80166
BRD-K70237115	0.0288608	-	-
BRD-K81277520	0.0288605	-	-	6.2033
BRD-K75746738	0.0288503
BRD-K18523456	0.0288417	-	-	1.81271
BRD-K66416915	0.0288403	-	-	6.07893
BRD-K66494817	0.0288241	-	-	3.40001
BRD-K03730976	0.0288225	-	-	2.91246
BRD-K12654187	0.0288217	-	-	2.22748
BRD-M36167927	0.0288148	CHEK1, CHEK2	CHK inhibitor	4.34745
BRD-K12342133	0.0288108	-	-	3.29917
BRD-K94274196	0.0288092	NGF, NGFR	NGF binding inhibitor	3.24653
mebhydrolin	0.0288091	-	-	3.93376
BRD-K31233830	0.028806	-	-	2.13633
RAN-14A	0.0288056	-	-	4.59986
BRD-K06486491	0.028796	-	-	2.22185
BRD-K96703103	0.0287906	-	-	6.79661
BRD-K20119884	0.0287903	-	-
BRD-K43188042	0.0287886	-	-	2.92311
carisoprodol	0.0287883	-	-	2.23392
linifanib	0.0287875	-	-	5.46519
BRD-K32019201	0.0287784	-	-	2.8861
BRD-K82494568	0.0287742	-	-
BRD-K32893898	0.0287722	-	-
fluconazole	0.0287679	-	-	3.40853
BRD-K22265882	0.0287573	-	-	3.37666
galantamine	0.028755	-	-	1.24117
BRD-K23304679	0.0287497
ST-91	0.0287421	-	-	6.28811
BRD-K19225848	0.0287398	-	-	3.54183
BRD-K53111504	0.0287378	-	-	4.1517
BRD-K79149684	0.0287306	-	-	4.41854
SA-94315	0.028713	-	-	3.64032
BRD-K63716333	0.0287069	-	-	3.41909
BRD-K97925203	0.0287064	-	-	4.46041
BRD-K87951090	0.0286964	IL12A	Interleukin synthesis inhibitor	3.62862
BRD-K02876750	0.0286907	-	-	3.53225
BRD-K40221630	0.0286735	-	-	3.22596
BRD-K04275703	0.0286696	-	-	2.69933
BRD-K34423419	0.028668	-	-	4.7528
cefadroxil	0.0286669	-	-	2.90907
BRD-A69429454	0.0286557	-	-	2.36807
BRD-K94903598	0.0286548	-	-	7.45011
BRD-K47456901	0.0286436	-	-	3.38016
BRD-K41563239	0.0286388	-	-	1.74524
BRD-K02280251	0.0286368	-	-	2.16969
BRD-K99515159	0.0286351	-	-	2.53246
BRD-K13835847	0.0286343	-	-	7.65452
BRD-K64560329	0.0286267	-	-	2.77005
BRD-K28576143	0.0286163	-	-	4.52215
BRD-K44238634	0.0286083	-	-	3.4582
BRD-K18237196	0.0286071	-	-	6.41904
BRD-K70012251	0.0286061	-	-
BRD-A02241946	0.0285866	-	-
BRD-K15259307	0.0285829	-	-	3.1782
BRD-K13090434	0.0285824	-	-	3.63119
BRD-K77032979	0.0285822	-	-	3.39435
lavendustin-c	0.0285692	-	-
BRD-K07600484	0.0285652	ACHE	Acetylcholinesterase inhibitor	5.4724
BRD-K27997230	0.0285644	-	-	4.11599
BRD-K19597888	0.0285618	-	-	2.99536
BRD-K92795658	0.0285607	-	-	2.73452
BRD-K04251331	0.0285551	-	-	3.74525
BRD-K53168433	0.0285508	-	-	3.75808
BRD-K76734722	0.0285411	-	-	4.44242
BRD-K53774864	0.02854	-	-	4.20891
BRD-K42679620	0.0285376	-	-	6.67544
BRD-K57701450	0.028534	-	-	2.45735
BRD-K71247208	0.0285296
BRD-K76571344	0.0285281	-	-	6.50546
BRD-K52833964	0.0285256	-	-	3.5393
BRD-K65178566	0.0285178	-	-	3.15128
BRD-K73876582	0.0285152	-	-	3.3731
BRD-K13803936	0.0285078	-	-	4.1382
BRD-K01192156	0.0285033	-	-	3.69669
BRD-K23062575	0.0285027	-	-
BRD-K90594901	0.0285008	OPRD1	Opioid receptor agonist	6.90522
BRD-A18945128	0.0284894	-	-	4.8225
BRD-K59019422	0.0284875	-	-	3.56395
BRD-K07442049	0.0284828	-	-	6.10902
BRD-K52240583	0.0284666	-	-
BRD-K27137352	0.0284625	-	-
BRD-K69350885	0.0284546	-	-	3.697
BRD-K18594025	0.0284539
BRD-K18149487	0.0284463	-	-	0.904966
BRD-K13417398	0.0284386	-	-	3.99524
BRD-K05113171	0.0284365	-	-	3.16618
BRD-K33863933	0.0284348	-	-
BRD-K07484899	0.0284334	-	-	3.58349
BRD-A52518985	0.0284248	-	-
BRD-K72050226	0.0284197
BRD-K70512038	0.028416	-	-
BRD-K57894545	0.0284133	-	-	3.45183
BRD-K28811650	0.0284112	-	-	3.5211
BRD-K20171002	0.0284047	-	-	4.55632
BRD-K47569187	0.0284039	-	-	4.65726
BRD-K89486464	0.028386	-	-	3.58122
BRD-A94675310	0.0283816	-	-	4.45235
BRD-K31788299	0.0283639	-	-	7.65452
dimaprit	0.0283567	-	-	5.02251
BRD-K91969329	0.0283438	-	-	2.11536
BRD-K15672523	0.0283391	-	-	3.13313
BRD-K95489112	0.0283369	-	-	2.65264
isorotenone	0.0283339	-	-	3.2793
BRD-K33368320	0.0283177	-	-	3.30306
BRD-K91784140	0.0283157	-	-	3.10665
BRD-K84521734	0.0283074	-	-	3.99715
endecaphyllin-x	0.0283068	-	-	2.87134
BRD-K03934491	0.0283047	-	-
BRD-A55521341	0.0283044	-	-	3.44829
BG-1026	0.0282961	-	-	3.34743
rosiglitazone	0.0282903	-	-	8.18158
BE-2254	0.0282868	-	-
BRD-A96537953	0.028273	-	-	2.78076
FU-JMBII127B	0.0282663	-	-	2.74276
BRD-K67531128	0.0282567	-	-
BRD-K20737562	0.0282528	-	-	3.95751
BRD-A70879086	0.0282506	-	-
BRD-K06724886	0.028249	-	-	5.21021
DAC-013	0.0282425	-	-	4.10773
BRD-K31067719	0.0282404	-	-	2.87129
BRD-K76087207	0.0282398	-	-	3.9059
BRD-K50210179	0.0282381	-	-	4.1812
BRD-K66877406	0.0282118	-	-	3.56133
BRD-K73895377	0.0281921	-	-	5.88505
BRD-K42438139	0.028184	-	-	3.05088
BRD-K62965224	0.0281779	-	-
BRD-K51640940	0.0281748	-	-	3.41875
BRD-K68665543	0.0281666	-	-	2.53969
propylthiouracil	0.0281623	-	-	4.48124
BRD-K84567604	0.0281613	-	-	4.82117
BRD-K74042281	0.0281603	ATP4A	ATPase inhibitor	3.93086
BRD-K37055263	0.028156	-	-	4.18718
BRD-K14207150	0.0281549	HTR1D	Serotonin receptor agonist	4.28421
BRD-K90294313	0.0281385	-	-	6.40368
BRD-K86110682	0.0281381
CS-2092524	0.0281329	-	-
BRD-K73880067	0.0281317	-	-	4.49386
BRD-K75669394	0.0281222	-	-	3.39435
BRD-K72875756	0.0281207	-	-	2.0942
fipronil	0.0280962	-	-	6.03314
dipropyl-5ct	0.0280928	BCL2	BCL inhibitor	4.35288
BRD-K95607309	0.0280804	-	-	2.41753
BRD-K33685212	0.0280772	AHCY	Adenosylhomocysteinase inhibitor	2.4839
BRD-K22166546	0.0280701	-	-
BRD-K84389640	0.0280599	-	-	0
silibinin	0.0280576	-	-	5.5521
BRD-K09304381	0.0280481	-	-	4.03628
BRD-K72813540	0.0280458	-	-	5.49505
BRD-K07303702	0.0280451	-	-	3.4055
BRD-K63668467	0.0280441	-	-	2.36283
BRD-K57016057	0.0280387	-	-	1.74196
vinyl-acetate	0.0280362	MAP2K2, MAP2K1	MEK inhibitor	3.31969
BRD-K02526659	0.0280339	-	-	5.90067
BRD-K79732056	0.0280319	CYP2C19, CYP2D6	Voltage-gated sodium channel blocker	7.99635
BRD-K24550549	0.0280255	-	-	4.61114
BRD-K51411441	0.0280176	-	-	3.17878
BRD-K38659247	0.0280165	-	-	3.21777
BRD-K74512976	0.0280156	-	-	3.40908
BRD-K27998900	0.0280146	-	-	4.97208
BRD-K23432132	0.0280117	-	-
BRD-K66841501	0.0280058	-	-	3.46376
BRD-K16472441	0.0279915	-	-
BRD-K12132598	0.0279852	-	-	3.3605
BRD-K05351800	0.0279759	-	-
BRD-K32881384	0.0279748	-	-	2.40127
BRD-K31998493	0.0279663	-	-
BRD-K85776843	0.0279635	-	-	4.38034
BRD-M03817478	0.0279564
BRD-K53127464	0.0279561	-	-	1.74915
BRD-A17718497	0.0279543	-	-	3.68275
INCB-3284	0.0279515	-	-
BRD-K05940224	0.0279509	-	-	5.16596
BRD-K18346873	0.0279333	IMPDH1, IMPDH2	IMPDH inhibitor	1.21418
tubocurarine	0.0279287	-	-
BRD-K60584379	0.0279187	-	-	3.38279
BRD-K85162983	0.0279118
BRD-K56384677	0.02791	MCL1, BCL2, BCL2L1	BCL inhibitor	1.23142
BRD-K60644933	0.0279004	-	-	0.928129
terreic-acid	0.0278963	-	-	4.60691
BRD-K75906982	0.0278918	-	-	3.96899
BRD-K56120807	0.0278905	-	-
BRD-K88196769	0.0278885	-	-	3.72114
BRD-K77291765	0.0278856	-	-	4.17888
BRD-K29111485	0.0278835
regadenoson	0.0278722	-	-	3.1706
BRD-K74971765	0.0278527	-	-	2.96692
BRD-K08706435	0.0278448	-	-	2.01007
BRD-K97233756	0.0278388	-	-
BRD-K49745983	0.0278365	-	-	6.6695
BRD-K72717797	0.0278327	-	-	2.91318
BRD-K47461610	0.0278281	-	-
BRD-K47716199	0.0278155	-	-
BRD-K01676918	0.0278118	-	-	5.44977
BG-1005	0.0278115	-	-	2.6007
BRD-K35240878	0.0278034	HDAC1	HDAC inhibitor	3.77745
BRD-K97938633	0.0277934	-	-	2.67273
BRD-K25199508	0.0277934	-	-	3.16121
BRD-K73531877	0.0277929	-	-	4.488
BRD-K12460566	0.027791	-	-	5.9129
BL-050	0.0277908	-	-
BRD-K21822525	0.0277851	-	-	3.98798
BRD-K78015078	0.027782	-	-	3.21859
BRD-K66383562	0.0277809	GABBR1	GABA receptor modulator	2.48569
BRD-K57579117	0.0277794	-	-	4.05653
BRD-K75984692	0.027772	-	-
BRD-K74667984	0.0277717	-	-	2.93973
BRD-K05857732	0.0277671	-	-	5.90856
ichthynone	0.0277606	-	-	3.0034
BRD-K44635753	0.0277486	-	-	4.16356
BRD-K50791983	0.0277483	-	-	3.77062
cephalothin	0.0277368	-	-	1.62991
BRD-K50498614	0.0277302	P2RY12	Purinergic receptor antagonist	5.24314
BRD-K74713361	0.0277301	SCN10A, SCN9A, SCN5A	Histamine receptor agonist	5.58364
edoxudine	0.027729	-	-
BRD-K75040614	0.0277235	-	-
JPR-3-97-17	0.0277169	-	-	2.68135
BRD-K70618663	0.0277043	-	-	3.55948
BRD-K24329506	0.0277029	-	-	4.2305
BRD-K14340046	0.0276825	MMP1	Matrix metalloprotease inhibitor	4.6339
BRD-K69435400	0.0276758	-	-	3.13181
BRD-K02502363	0.0276738	-	-	3.3901
BRD-K77354700	0.0276677	-	-	3.26693
BRD-K06804050	0.0276644	-	-
BRD-K04378630	0.0276608	-	-	4.35424
BRD-K68855692	0.0276542	-	-	7.76453
BRD-K59022317	0.0276524	-	-	3.47565
BRD-K89806367	0.0276462	-	-
hesperetin	0.0276454	-	-	2.46709
BRD-K94881465	0.0276436	-	-	4.2142
BRD-K69532760	0.0276413	-	-	3.45204
BRD-K52124788	0.0276311	-	-	4.21936
BRD-K54876931	0.0276267	-	-
BRD-K17765399	0.0276206	-	-	8.92821
pentobarbital	0.0276176	-	-	1.74141
BRD-K77596469	0.0276157	-	-	2.68135
BRD-K92891227	0.0276135	-	-	3.31835
BRD-K52500055	0.0276055	-	-
BRD-K64751695	0.0276028	-	-
BRD-K95007662	0.0275998	-	-
BRD-K62318087	0.027596	-	-	4.24027
BRD-K95992530	0.027594	-	-	4.56589
SR-147778	0.0275929	-	-	3.96453
BRD-K12575545	0.0275926	-	-	3.58279
BRD-K97440159	0.027586	-	-
BRD-K69291665	0.0275768	-	-	5.09109
BRD-K51520673	0.027571	-	-	4.83311
BRD-K17686226	0.0275707	PIM1	Pim kinase inhibitor	4.12595
BRD-K81491172	0.0275508	ADRA2A, ADRA2B, ADRA2C	Adrenergic receptor agonist	9.3666
TCPOBOP	0.0275505	-	-	3.28609
BRD-K36054906	0.0275493	-	-	3.60956
pirlindole	0.0275424	-	-
BRD-K61596998	0.027537	-	-	1.34997
BRD-K30463976	0.0275368	-	-
BRD-K18096819	0.0275359	SELP	P selectin inhibitor	4.26416
BRD-K09168812	0.027529	-	-	2.11189
BRD-K96408604	0.0275268	-	-	3.5834
BRD-K46363727	0.0275103	-	-
BRD-K08760804	0.0275014	-	-	6.24605
BRD-K25954314	0.0274981	-	-	3.02795
SA-1938867	0.0274935	-	-	3.45312
BRD-K12441550	0.0274768	-	-	5.52229
BRD-K83336892	0.0274708	-	-
BRD-K50126643	0.0274608
BRD-K86379744	0.0274604	-	-	4.01218
BRD-K99074976	0.0274538	-	-	1.39628
indinavir	0.0274442	-	-	2.66592
BRD-K48388979	0.0274432	-	-	3.67913
BRD-K65526065	0.0274304	-	-	3.09345
BRD-K50036850	0.0274303	-	-	6.18697
BRD-K42021584	0.0274297	-	-	3.73035
BRD-K98720112	0.0274212	-	-	2.77005
BG-1031	0.0274211	-	-	5.46078
BRD-K05861053	0.0274182	ADORA1	Adenosine receptor antagonist	3.7646
BRD-K57082361	0.0274161	-	-	3.54778
BRD-K63303938	0.027415	-	-	3.18302
BRD-K60002786	0.0274094	-	-
BRD-K24978625	0.027396	KCNH2, HTR4	Serotonin receptor agonist	4.2465
BRD-K74894470	0.0273937	-	-	2.11536
BRD-K61929092	0.0273896	-	-	5.35298
BRD-K71533863	0.0273839
BRD-K43786699	0.0273766	-	-
BRD-K39318389	0.0273663	-	-	3.15137
BRD-K03651051	0.0273643	-	-	2.67176
betamethasone-valerate	0.0273583	-	-	3.84147
BRD-A29731977	0.0273524	-	-	1.05281
BRD-K66866270	0.027338	-	-
BRD-K74860368	0.0273372	-	-	3.56885
BRD-K20517870	0.0273318	-	-	4.4087
BRD-K88488723	0.0273112	-	-
BRD-K04181823	0.0273092
BRD-K73659883	0.027302	-	-
OVE-238	0.0273013	-	-
m-3M3FBS	0.0272988	-	-	4.09732
BRD-K07473223	0.0272931	-	-	3.05689
BRD-K73567619	0.027291	-	-	3.05881
BRD-K38984040	0.0272832	-	-	2.0723
BRD-K84113859	0.0272779	-	-	2.3543
BRD-K19857788	0.027271	-	-	4.51338
BRD-K24599650	0.0272633	-	-	1.63849
BRD-K73700643	0.0272631	-	-	3.00793
BRD-K57754556	0.027255	-	-	4.44242
BRD-K16796151	0.0272463	EGFR	EGFR inhibitor	1.73669
BRD-K08970510	0.0272456	-	-
BRD-K60362139	0.0272381	-	-
BRD-K30173420	0.0272359	-	-	2.26402
zebularine	0.0272327	-	-	2.8861
BRD-K89179622	0.0272192	-	-
dioxane	0.0272176	-	-
BRD-K58853583	0.0272148	-	-	3.29681
BRD-A92490200	0.0272086	-	-	3.57545
BRD-K27452769	0.0272079	-	-
BRD-K64873832	0.0272024	-	-
BRD-A36774080	0.0272018	-	-	4.15316
ricinine	0.0272003	-	-
BRD-A35141262	0.0272001	-	-	3.60699
BRD-K13997553	0.027199	-	-	3.25418
BRD-K59606716	0.0271946	-	-	4.37043
BRD-K75393430	0.0271935	SLC6A2, SLC6A4	Tricyclic antidepressant	6.96301
ZG-10	0.0271931	-	-
BRD-K30064966	0.0271929	-	-
BRD-K64639565	0.0271903
BRD-K94633563	0.0271902	-	-	3.72321
PIT	0.0271775	-	-	4.54231
BRD-K02964016	0.0271711	-	-	3.64876
BRD-K83898111	0.027168	-	-	4.20372
BRD-K65054381	0.0271635	-	-	2.64878
BRD-K92009052	0.0271623	-	-
BRD-K87550320	0.0271617	-	-	3.10536
fursultiamine	0.0271614	-	-	6.73713
BRD-K40776502	0.027159	GRIN2B, GRIN2A, GRIN1	Glutamate receptor antagonist	7.4403
BRD-K72602058	0.0271484	-	-
BRD-M74304337	0.0271416	-	-
nitrarine	0.027138	-	-
BRD-K68108628	0.0271368	-	-	3.63605
BRD-K68826049	0.0271213	-	-	2.56912
proguanil	0.0271171	-	-	4.22316
BRD-K39017054	0.0271147	-	-
BRD-K21610715	0.0271096	-	-	3.74044
BRD-K92524823	0.0271053	-	-	3.27749
BRD-K66898048	0.0271002	-	-	3.78708
BRD-K53971345	0.0270941
BRD-K72591075	0.0270814	-	-	4.15189
BRD-K70794677	0.027081	-	-	2.57475
BRD-K73227372	0.027079	-	-	3.35831
BRD-K62554329	0.0270711	-	-	4.05299
BRD-K82423177	0.0270615	CHRM1	Acetylcholine receptor antagonist	4.7407
BRD-A14999564	0.0270613	-	-	4.47242
BRD-K00938872	0.0270575
BRD-K12099407	0.0270539	-	-	4.59821
BRD-K66030669	0.0270516	-	-	5.22938
BRD-K52032805	0.0270421	-	-	2.91725
BRD-K41033343	0.0270404	-	-	6.26573
BRD-K57734337	0.0270366	-	-	4.1033
BRD-K10372036	0.027036	-	-	2.84922
BRD-K08593711	0.0270358	ODC1	Ornithine decarboxylase inhibitor	1.87482
BRD-K77014406	0.0270291	-	-
BRD-K48358706	0.0270279
BRD-K21683465	0.0270258	-	-	2.64199
BRD-K78904317	0.0270227	-	-	4.56458
BRD-K37455698	0.0270142	-	-	9.45493
BRD-K66909712	0.0270046	-	-	2.20073
BRD-K88391199	0.0270001	-	-	3.87376
BRD-K19549004	0.0270001	-	-	4.28304
BRD-K00505499	0.0269985	-	-	1.87047
BRD-K40145790	0.0269942	-	-	2.87307
BRD-A98888138	0.0269926
BRD-K45861923	0.0269906	-	-	3.19294
levonorgestrel	0.0269721	-	-	3.45895
BRD-K80362711	0.0269653
sulfinpyrazone	0.0269616	-	-	2.62253
imiloxan	0.0269611	-	-	1.9685
BRD-A11929187	0.026953	-	-	3.46843
BMY-7378	0.0269493	-	-	2.96717
BRD-K93181983	0.0269445	-	-	3.47565
benserazide	0.0269428	-	-	3.10536
BRD-K06174863	0.026932	-	-	3.64801
BRD-K81079621	0.0269307	-	-
BRD-K25649458	0.0269284	ACHE	Acetylcholinesterase inhibitor	7.02775
BRD-A84389633	0.0269267	-	-	4.21188
BRD-K46044238	0.0269225	-	-	6.05986
fenbufen	0.0269205	-	-	2.97411
BRD-A05828965	0.0269202	-	-	2.52581
BRD-A01317026	0.0269189	-	-	3.60563
BRD-K22449045	0.0269155
BRD-K56408846	0.0269064	MTOR	Sodium channel blocker, Calcium channel modulator	4.79535
BRD-K40252598	0.0268991	-	-	4.46041
BRD-K78097639	0.0268892	-	-	4.38034
BRD-K23794511	0.0268859	-	-	2.16854
BMS-270394	0.0268748	-	-	3.94495
BRD-K11641139	0.0268665
BRD-K36938987	0.0268649	-	-	3.36482
BRD-K40628295	0.0268621	-	-
BRD-K11847435	0.026858	-	-	3.71119
BRD-K30738885	0.026852	-	-	4.5591
BRD-K68731139	0.0268489	-	-	3.12724
BRD-K90040724	0.0268421	-	-
BRD-K78206606	0.0268413	-	-	3.30006
BRD-K05118964	0.0268286	-	-	3.74261
BRD-K74189021	0.0268265	-	-	2.85085
BRD-K89440651	0.0268237	-	-	2.81998
BRD-K95927760	0.0268235	DRD2, DRD1, HTR2A, HRH1, DRD3, HTR2C, HTR6, DRD4	Dopamine receptor antagonist, Serotonin receptor antagonist	7.1047
BRD-K53549851	0.0268159	-	-	1.9685
quinine	0.0268114	-	-	2.03366
BRD-K76688030	0.0268099	-	-
BRD-K40738002	0.0268071	-	-	2.68611
BRD-K02862004	0.0268015	-	-	3.38532
BRD-K19608864	0.0267838	-	-	2.96957
BRD-K83553001	0.0267805	-	-	2.38275
BRD-K10798676	0.0267579	-	-	4.79098
BRD-K30963311	0.0267557	-	-	4.01214
BRD-K48541282	0.0267448	-	-	3.73524
BRD-K34044309	0.0267408	-	-	1.56859
GALR3_GALANIN	0.0267392	-	-	4.34934
BRD-K10820981	0.0267302	-	-	4.82813
BRD-K17122162	0.026729	CDK2, CDK5	CDK inhibitor	4.89404
varenicline	0.0267254	-	-	4.21055
BRD-K17197507	0.0267241	-	-	1.54557
BRD-K59609877	0.0267238	-	-
BRD-K19264579	0.0267208	NR3C1	Glucocorticoid receptor agonist	3.22191
valdecoxib	0.0267186	-	-
BRD-K98113345	0.026718	-	-	3.41079
BRD-K63024248	0.0267179	-	-
BRD-A25852694	0.0267142	AR	Androgen receptor antagonist	3.30627
BRD-K37544873	0.0267111	-	-
BRD-K83010768	0.0267059	-	-
BRD-K46924722	0.0267005	-	-	3.70934
BRD-K01825565	0.0266941	-	-	2.74644
BRD-K11893906	0.0266911	-	-
SA-1939891	0.0266834	-	-	3.15542
MRS-1334	0.0266757	-	-	2.66442
BRD-K75996234	0.0266732	-	-	2.90788
BRD-K06780475	0.0266702	-	-	5.69624
little-saas	0.0266631	-	-
BRD-K22959724	0.0266604
BRD-K27986637	0.0266596	-	-	3.99564
BRD-K75967530	0.0266542	-	-	3.9059
BRD-K35514965	0.0266508	-	-	4.25202
LY-344864	0.0266506	-	-	7.0211
BRD-K11911738	0.0266344	-	-	2.74644
BRD-K80174954	0.0266089	-	-	3.80098
BRD-K85802361	0.026608	-	-	1.32015
BRD-K84687999	0.0265957	-	-	3.59183
4-chlorophenylguanidine	0.0265939	-	-
BRD-K24333636	0.0265935	-	-	3.02245
BRD-K73737710	0.0265909	-	-
BRD-K81397638	0.02659	-	-	2.96717
BRD-A06232236	0.0265892	-	-
BRD-K83625314	0.0265861	-	-
BRD-K43610632	0.0265782	-	-	6.89283
BRD-K43499440	0.0265782	-	-	4.09516
BRD-K69021148	0.0265663	-	-	4.95427
CHIR-99021	0.0265626	-	-
BRD-K87913872	0.0265604	-	-	2.78378
BRD-K34256721	0.026554	-	-	3.48496
BRD-K74107343	0.0265529	-	-	3.37382
BRD-K10178088	0.0265487	-	-	3.43476
tocainide	0.0265457	-	-	3.99203
BRD-K03154735	0.0265431
BRD-K29965657	0.026538	-	-	3.44495
BRD-K60354118	0.0265336	-	-	3.53827
BRD-K48016779	0.0265319	-	-	7.33366
BRD-K00541156	0.0265297	-	-	2.245
BRD-K44097254	0.0265278	ADORA2B	Adenosine receptor antagonist	3.024
BRD-K31300534	0.0265261	-	-
BRD-K23684100	0.0265197	-	-	2.84377
BRD-K91952416	0.0265173	-	-
BRD-K84988480	0.0265144	CCR5	CCK receptor antagonist	5.27521
BRD-K19385772	0.0265071	-	-	2.59035
BRD-K12343830	0.0265035	-	-	3.39376
BRD-K07071690	0.0264925	-	-	4.28065
BRD-K02445831	0.0264878	-	-
camicinal	0.0264836	-	-	1.72209
BRD-K24752397	0.0264814	-	-	3.37502
napelline	0.0264804	-	-
BRD-K72999223	0.0264591	MGMT	DNA alkylating agent	2.91358
BRD-K77548697	0.0264557	-	-	2.59945
BRD-K21682170	0.0264399	-	-	3.97503
BRD-K87217296	0.0264213
BRD-K22673215	0.0264207	-	-	3.75868
BRD-K20763958	0.0264105	-	-	2.96491
BRD-K10405667	0.0264045	-	-
BRD-A02612852	0.026403	-	-
eprobemide	0.0263954	-	-	4.39835
BRD-K34940426	0.0263927	-	-	4.16852
BRD-A96007399	0.0263895	-	-	4.0305
BRD-K64073423	0.0263874
BRD-K22211348	0.0263823	GCGR	Glucagon receptor antagonist	2.27686
BRD-K93176491	0.0263781	-	-	7.53451
calpeptin	0.0263769	-	-	0.177092
BRD-K86112430	0.0263759	-	-
BRD-A34774643	0.0263733	-	-	3.2657
T-0156	0.0263705	-	-
lidocaine	0.0263683	-	-	3.79777
BRD-K61651560	0.0263624	-	-	3.56159
BRD-K02403042	0.0263554	-	-	5.1751
BRD-K13122423	0.0263531	-	-	3.11635
CD-1530	0.0263433	-	-	4.35103
farnesylpyrophosphate	0.026339	-	-	3.08459
BRD-K53249762	0.0263381	-	-	3.1706
BRD-A41228941	0.0263367	DRD1, DRD2, DRD3	Dopamine receptor antagonist	6.92825
BRD-K26309991	0.0263178	-	-	6.87447
RS-16566	0.0263171
BRD-K28636199	0.0263155	AR	Androgen receptor agonist	4.09141
BRD-K50513128	0.0263084	-	-	3.37069
BRD-A12166214	0.0263069	-	-	3.29378
BRD-K61033092	0.026302	-	-
BRD-K96935347	0.0262949	-	-	3.44033
BRD-K55910052	0.0262934	-	-	4.77072
BRD-K71205264	0.0262789	-	-
BRD-K40057256	0.0262767	-	-	3.7598
BRD-K07025286	0.0262742	-	-	2.37879
BRD-K08041211	0.0262591	-	-	2.41913
BRD-K31262969	0.0262565	-	-	3.08033
BRD-K01463939	0.0262515	-	-	2.17109
BRD-K52139780	0.0262503	-	-	2.77459
BRD-K61485275	0.0262451	-	-	5.92327
BRD-K36596997	0.026245	-	-
BRD-K08565465	0.0262336	-	-
BRD-K30121969	0.0262279	-	-	4.53404
BRD-K73196232	0.026223	-	-
sericetin	0.0262225	-	-	3.0156
BRD-K11571815	0.0262177	-	-	4.11734
BRD-K19431609	0.0261999	-	-	1.70873
BRD-K24304282	0.0261895	-	-	3.05537
BRD-K03188480	0.026186	-	-	3.06086
BRD-K01591707	0.026186	-	-	2.55015
BRD-K61432982	0.0261848	-	-	4.27224
BRD-K38263412	0.0261821	-	-
clonidine	0.02618	ERBB4, EGFR, ERBB2	EGFR inhibitor	3.06929
BRD-K36029679	0.026175	-	-	6.85936
BRD-K80176886	0.0261634	-	-	3.56133
BRD-K05329107	0.0261607	-	-	3.12724
BRD-K28372487	0.0261542	-	-
BRD-K36884445	0.026154	-	-	3.14254
pyrrolidine-dithiocarbamate	0.0261518	-	-	4.84176
BRD-A34891365	0.0261498	-	-	2.36283
BRD-K92759025	0.0261442	-	-	4.37824
BRD-A09115727	0.0261396	-	-	2.40573
BRD-K46625537	0.0261331	-	-	2.87739
BRD-A75558199	0.0261247	-	-
BRD-K75094875	0.0261222	-	-	3.52256
BRD-K13027675	0.0261217	-	-	4.5028
BRD-K36446300	0.0261214	-	-	3.98743
BRD-K29475732	0.0261127	-	-	4.40528
BRD-K72354054	0.0261075	-	-	4.71084
BRD-K10268154	0.0261036	-	-	1.96554
BRD-M09121311	0.0261018	-	-	1.94213
BRD-K50342369	0.0261003	-	-	3.86725
BRD-K54906270	0.0260989	-	-
BRD-K59955428	0.0260982	-	-	2.55646
BRD-K54042694	0.0260935	-	-
BRD-K91576495	0.0260825	-	-	3.1237
SA-425929	0.026079
BRD-K51087734	0.0260788	IKBKB	IKK inhibitor	3.79105
BRD-K78235165	0.0260782	-	-	4.12172
DMBI	0.0260779	-	-	2.71845
BRD-K66216147	0.0260774	-	-
BRD-K40750649	0.0260724	GRM1	Glutamate receptor antagonist	4.03199
BRD-K14169964	0.0260714	-	-	2.24126
BRD-K64404450	0.0260705	-	-	3.77136
BRD-K86845405	0.0260696	-	-	9.10693
BRD-K69471644	0.0260652	-	-	4.06072
voglibose	0.0260651	-	-	2.96491
BRD-K69834831	0.0260556	TUBB	Tubulin inhibitor	5.63152
BRD-K82154894	0.0260499	-	-	1.87957
nefazodone	0.0260447	-	-	3.02336
BRD-K39158620	0.0260415	-	-	6.74131
BRD-K03308716	0.0260371	KCNA3	Potassium channel blocker	3.80394
BRD-K71980706	0.0260307	PDGFRA	PDGFR inhibitor	4.62589
BRD-K46734661	0.0260307	-	-	3.39915
BRD-K09458434	0.0260289	-	-
oxymetazoline	0.0260239	-	-	2.9352
BRD-K10017294	0.0260217	-	-	6.42145
BRD-K49656278	0.0260216	-	-	3.8433
BRD-K16911140	0.026018	-	-	1.74524
BRD-K55522920	0.0260165	-	-	2.95372
BRD-A03121430	0.0260092	-	-	3.00558
fisetinidol	0.0260087	-	-
BRD-K31805261	0.0260013	-	-	3.96581
BRD-K85444001	0.0259993	-	-	3.30976
wnt-c59	0.0259823	-	-	2.05035
BRD-K84103449	0.0259821	-	-	1.67541
BRD-U01690642	0.0259772	-	-	1.73438
rebastinib	0.0259699	-	-	2.86698
SA-418267	0.0259678	-	-	2.80201
BRD-K88504000	0.0259663	-	-	3.79518
GGTI-2133	0.0259623	-	-	3.72668
BRD-A98795688	0.0259491	-	-	4.51418
BRD-K43256821	0.0259453	-	-	1.91176
BRD-K42589221	0.0259391	-	-	3.1064
BRD-K64632606	0.0259325	-	-	3.33694
BRD-K65541951	0.0259293	-	-	6.03314
AZD-1283	0.0259282	-	-	3.69093
BRD-K15285842	0.0259198	-	-	4.95952
BRD-K07530355	0.0259009	-	-
BRD-K20644549	0.0258967	-	-	1.66435
BRD-K88000297	0.0258938	-	-	3.42152
DFCI-LW10	0.0258925	-	-	7.63183
BRD-K55282910	0.0258907	-	-	2.66839
BRD-K86155080	0.0258869	-	-
BRD-K20897375	0.0258849	-	-	2.75405
chlorambucil	0.0258686	-	-	2.10964
mifepristone	0.0258586	FNTA, FNTB	Farnesyltransferase inhibitor	3.13142
BRD-K03272554	0.0258574	-	-
BRD-K79324911	0.0258518	-	-
BRD-K10361096	0.0258497	-	-
ondansetron	0.0258493	-	-	4.59328
BRD-K73952959	0.0258416	-	-	4.34934
BRD-K45714931	0.0258383
BRD-K73951926	0.0258289	-	-	4.34698
BRD-K67197636	0.0258249	-	-
BRD-K28753508	0.0258184	-	-	3.67951
SM-406	0.0258174	-	-	3.05088
BRD-K50408407	0.0258107	-	-	3.3178
BRD-K42568865	0.0258067	-	-	4.20308
BRD-K38446773	0.0258054
BRD-K40471863	0.0258032	-	-	3.37069
BRD-K30111752	0.0258005	-	-	2.8879
BRD-K15750053	0.0257953	-	-	1.99932
BRD-K99723587	0.0257953	-	-	5.11191
BRD-K51372689	0.025787	-	-
picrotoxin	0.0257796	-	-	3.76327
BRD-K77965546	0.025779	-	-	2.85781
BRD-K72787121	0.0257763	-	-	3.10548
BRD-K17375958	0.0257762	-	-
BRD-K60004464	0.0257758	-	-	3.63026
BRD-K54391669	0.0257684	-	-	2.68213
BRD-K71142328	0.0257647	-	-	3.14138
BRD-K03911650	0.0257619	-	-
BRD-K72800151	0.02576
BRD-A06909528	0.0257516	OPRM1, OPRK1, OPRD1	Opioid receptor agonist	5.55907
BRD-K94049419	0.0257504	-	-	3.0312
BRD-K39639513	0.0257464	-	-	1.81945
BRD-K42251804	0.0257417	-	-	4.59835
BRD-A55020151	0.0257315	-	-	2.97501
BRD-K34834946	0.0257272	-	-	3.73404
BRD-K48566675	0.0257195	-	-	2.68063
BRD-K83859448	0.0257186	-	-	2.87957
BRD-K49907578	0.0257152	-	-	2.78732
BRD-K92770212	0.0257143	-	-	3.03024
BRD-K46401069	0.0257141	CA1	PPAR receptor agonist, Beta amyloid inhibitor	2.60341
BRD-K47802551	0.0257138	-	-	5.90857
BRD-K16034108	0.0257137	-	-	4.16356
altretamine	0.025708	-	-	4.56792
BRD-K47504528	0.0257027	-	-	4.13392
BRD-K30795375	0.0257009	-	-	4.66904
BRD-K65409714	0.0256959	HTR1B, HTR1A, HTR1D, SLC6A4, HTR7	Serotonin receptor agonist, Serotonin receptor antagonist	7.87397
enobosarm	0.0256926	-	-	4.03575
BRD-K58118393	0.0256798
beta-testosterone	0.0256778	-	-	3.81721
BRD-K75260889	0.0256732	-	-	4.03097
BRD-K36651002	0.0256705	-	-	7.34932
BRD-K85664064	0.0256688	-	-
BRD-K33606137	0.0256663	CNR1	Cannabinoid receptor antagonist	4.19642
BRD-K57375725	0.0256568	-	-	2.86892
BRD-K86897283	0.025656	-	-	4.69692
BRD-K79797751	0.0256538	-	-
BAS-02859604	0.0256513	-	-	4.09051
BRD-K57251296	0.0256454	-	-	3.76232
BRD-K47887272	0.025635	-	-	3.15402
isosilybin-b	0.0256277	-	-	3.40855
BRD-K44131977	0.025621	-	-
BRD-K60744874	0.0256191	-	-	3.10299
BRD-K26423054	0.025611	-	-	2.30493
BRD-K74506609	0.0256106	-	-	3.02135
BRD-K64535513	0.0256093	-	-	3.96417
BRD-K04791118	0.0256021	-	-	2.26402
BRD-K68968009	0.0255999	-	-
BRD-K04108962	0.0255954	-	-
BRD-K75856618	0.0255935	-	-	2.50192
BRD-K35404971	0.0255907	-	-	5.69501
BRD-A71590475	0.0255841	-	-	5.31145
BRD-K34277236	0.0255816	-	-	3.75405
BRD-K26799408	0.0255799	-	-	6.47543
alclometasone	0.0255775
BRD-K46477974	0.0255736	-	-	1.59575
BRD-K49409924	0.025573	-	-	2.84273
BRD-K99749622	0.0255635
SA-1459020	0.0255556	-	-	3.52302
azaperone	0.025555	-	-
BRD-K47977047	0.0255443	-	-	0.502224
BRD-K61366105	0.0255385	-	-	2.9912
BRD-A77292814	0.0255045	-	-	3.55137
BRD-K54687541	0.0255037	-	-	3.73035
BRD-K57650037	0.0255034	HTR1B, HTR1A	Adrenergic receptor antagonist, Serotonin receptor antagonist	3.47227
BRD-K68512873	0.0255026	-	-
BRD-K31222955	0.0255026	-	-	3.92
enilconazole	0.0254999	-	-	3.20203
BRD-K12493093	0.0254969	-	-	3.37282
BRD-K61021741	0.0254926
BRD-K79212097	0.0254852	-	-	3.13599
BRD-K52669647	0.0254831	-	-
BRD-K89121101	0.0254824	-	-	2.372
BRD-K07981644	0.0254813	-	-	4.79098
BRD-K88388723	0.0254807	-	-	5.62769
nutlin-3	0.0254797	-	-	8.25386
BRD-K58774452	0.0254701	-	-	3.10592
BRD-K00846846	0.0254654	-	-	2.45609
warfarin	0.0254601	-	-	3.34085
BRD-K35788497	0.0254601	-	-	2.18753
BRD-K32644160	0.0254584	-	-	4.80954
BRD-A12372458	0.0254575	-	-	5.58536
BRD-K13719101	0.0254528	-	-	4.75883
BRD-K24698610	0.0254503	-	-
BRD-K15975627	0.0254457	-	-	2.6979
BRD-K87801302	0.0254451	DRD2, HTR2A	Dopamine receptor antagonist	5.82751
BRD-K62781263	0.0254436	-	-	5.14044
BRD-K96804382	0.0254423	-	-	1.37918
sildenafil	0.0254415	-	-	4.64038
BRD-K88487973	0.0254347	-	-	2.68515
BRD-K02529187	0.0254332	-	-	4.207
BRD-K06029218	0.0254328	-	-	2.3543
BRD-K37140349	0.0254284	-	-
BRD-K33396764	0.0254269	-	-	2.8281
BRD-K12336887	0.0254236	-	-
BRD-K99859971	0.0254214	-	-	3.95216
SB-258585	0.0254205	-	-	3.10592
BRD-K72754669	0.0254193	-	-
BRD-K84673192	0.0254142	-	-	2.12497
BRD-K92446632	0.0254114	PPARG	PPAR receptor agonist	5.7895
BRD-K50718861	0.0254086	-	-	6.26505
iobenguane	0.0254057	-	-	3.87864
ST-1859	0.0253967	-	-	2.39735
BRD-K44548010	0.0253964	-	-
BRD-K72010491	0.0253926	-	-	2.6497
BRD-K46445327	0.0253802	-	-	3.5722
BRD-K11782435	0.0253775	-	-	2.5975
BRD-K20531360	0.0253744	-	-	1.56859
BRD-K90361987	0.0253659	-	-	3.53242
BRD-M00964333	0.0253623	-	-	1.66673
BRD-K47443018	0.0253428
BRD-K02516751	0.0253327	-	-	3.85588
mefexamide	0.0253271	-	-	2.3531
BRD-K05649470	0.025325	-	-	2.74644
BRD-K56917655	0.0253157	-	-	3.25129
BRD-K68270916	0.0253134	-	-	2.47289
BRD-K65971331	0.0253132	-	-	2.87307
BRD-K23162004	0.0253092	HTR1B, ADRA2B, ADRA2C, DRD2, DRD1, ADRA1A, HTR1A, HTR2A, ADRA2A, DRD3, DRD5, HTR2B, HTR2C, HTR1D, DRD4	Dopamine receptor agonist	4.14182
BRD-K73013134	0.0253089	-	-
BRD-K25993054	0.0253076	-	-
BRD-K82158149	0.0253075	-	-
BRD-K06318195	0.0253071	-	-	3.51768
BRD-K87904079	0.0253008	-	-	3.68275
PFI-1	0.0253005	-	-	2.63974
ICI-162846	0.0252996	-	-
BRD-K32082369	0.0252992	MAOA, MAOB	Bacterial 50S ribosomal subunit inhibitor	4.47528
CHIR-124	0.0252929	-	-	2.38156
BRD-K97938674	0.0252925	CACNA1C	Calcium channel activator, L-type calcium channel activator	3.77686
BRD-K62957665	0.0252872	-	-	2.66191
BRD-K98676361	0.0252871	HTR1B	Serotonin receptor agonist	4.80934
BRD-K63860984	0.0252847	-	-	2.79729
vitexin	0.0252753	-	-	2.8273
BRD-K04928505	0.0252681	-	-	2.4723
BRD-K91633589	0.0252633	-	-
BRD-K34781184	0.0252624	-	-	3.58122
BRD-K42605555	0.0252591	-	-	3.1848
BRD-K34741587	0.0252584	-	-	1.02427
potassium-canrenoate	0.0252578	-	-	2.88717
BRD-K56775726	0.0252521	-	-
BRD-K24572125	0.0252518	-	-	2.23147
BRD-K52197325	0.0252403	-	-	3.14963
BRD-K93086630	0.0252397	-	-
BRD-K91895574	0.0252359	-	-
BRD-K57280824	0.0252174	-	-	2.45962
BRD-K60751982	0.0252174	-	-	2.97499
benzanthrone	0.0252154	-	-	2.0469
BRD-K29622226	0.0252128	-	-
BRD-K46737746	0.0252093	-	-	4.17586
BRD-K72500499	0.025208	PDE4A	Phosphodiesterase inhibitor	3.84807
BRD-K38557431	0.0252072	SLC6A2, KCNJ10, SLC6A4	Tricyclic antidepressant	9.78957
BRD-K32111336	0.0252063	-	-
BRD-A04392722	0.0251962	-	-
BRD-K76021727	0.0251956	-	-	1.70789
BRD-K12744550	0.0251795	-	-	3.2279
BRD-K91662540	0.0251764	-	-	1.70275
tiagabine	0.0251711	-	-	4.59986
BRD-K33956641	0.0251702	-	-	2.03487
BRD-K84788922	0.0251699	-	-	2.81341
BRD-A75471153	0.0251658	-	-	2.67833
BRD-K37959950	0.0251638	-	-	3.7022
SA-1920722	0.0251635	-	-	3.1114
alfaxalone	0.0251602	-	-	3.8168
BRD-K49923205	0.0251567	-	-	4.84176
BRD-K58534227	0.0251557	-	-	3.10682
BRD-K17553044	0.0251469	-	-	4.24257
BRD-A03668899	0.0251436	ALK	ALK inhibitor	3.52809
BRD-K67096634	0.025143	-	-	3.64876
BRD-K11504077	0.0251407	-	-	7.53472
BRD-K33891642	0.0251405	-	-	4.83311
BRD-K48038858	0.0251404	-	-
BRD-K00463125	0.0251328	-	-	3.94733
BRD-K59308946	0.0251282	-	-
BRD-K63420290	0.0251274	-	-	3.51427
BRD-K40597368	0.0251245	-	-	3.22966
BRD-K79600112	0.0251137	-	-
BRD-K78792702	0.0251113	-	-	5.24582
BRD-K45050268	0.0251033	-	-
SA-1938219	0.0251012	-	-
BRD-K97207863	0.0250924	-	-	4.31518
BRD-A19232309	0.0250906	-	-
BRD-K47536398	0.0250896	-	-	4.33746
BRD-K20876879	0.0250884	-	-	5.49997
BRD-K65780164	0.0250818	-	-	1.45795
BRD-M29370314	0.0250678
BRD-K29150200	0.0250666	-	-	5.05588
KU-C104486	0.0250584
BRD-K86771738	0.0250551	-	-	3.06164
avagacestat	0.0250482	-	-	4.90609
L-citrulline	0.0250431	CYP11B1	Cytochrome P450 inhibitor	5.12421
BRD-K95010912	0.0250405	-	-
naphazoline	0.0250318	FLT3, KIT	PKC inhibitor, FLT3 inhibitor, KIT inhibitor	2.77714
BRD-K26792953	0.0250317	-	-
BRD-K21472066	0.0250266	-	-	3.96186
viomycin	0.0250234	-	-	4.99946
BRD-K02635441	0.0250222	-	-	3.72898
BRD-K60862683	0.0250041	-	-	3.79938
BRD-K22380647	0.0249999	-	-	4.35163
UMB-32	0.0249991	-	-	4.43517
BRD-K32827536	0.0249948	-	-	2.86892
tcv-cys	0.0249906	-	-	7.58884
BRD-K65888165	0.0249673	-	-	3.1848
MW-A1-18	0.0249666	-	-	2.82894
caroxazone	0.0249572	-	-	2.52834
BRD-K72837898	0.0249532	CA9	Cyclooxygenase inhibitor	6.69231
BRD-K54971989	0.0249524	-	-	3.13304
BRD-K63188051	0.0249493	-	-	2.81049
BRD-K89599747	0.0249482	-	-
BRD-K28924448	0.0249355	-	-	2.87763
BRD-K95121261	0.0249313	-	-	2.29224
BRD-K07798964	0.0249311	CYP3A4, CYP2C8, CYP2C9	RNA polymerase inhibitor	1.94595
anthraquinone	0.0249268	-	-	3.04917
BRD-K39613696	0.0249263	-	-	2.372
BRD-K16149503	0.0249243	-	-
BRD-K17893805	0.024924	-	-
I-BET-762	0.0249195	-	-
AZD-8330	0.0249125	-	-
BRD-K82483257	0.0249115	-	-	3.04173
topiramate	0.0249083	-	-	2.19494
BRD-K34573818	0.0249007	-	-	4.21293
BRD-K61020385	0.0248947	-	-
BRD-K08006444	0.0248933	-	-	2.51283
BRD-K99516890	0.0248931	-	-	3.55011
BRD-K27290412	0.0248892	-	-
BRD-K22944782	0.024888	-	-	4.05723
BRD-K85072179	0.0248853	-	-	2.73519
benzonatate	0.0248786
BRD-K16512302	0.0248785	-	-	1.59243
BRD-K30198800	0.0248728	-	-	4.06059
REV-5901	0.0248682	-	-	3.32427
KU-C104230	0.0248679	-	-	2.38404
BRD-K03088187	0.0248631	-	-	2.92131
BRD-K02719847	0.024863	-	-	2.22168
GW-4064	0.0248622	-	-	2.6192
BRD-K49657628	0.0248544	-	-	2.52053
BRD-K07551625	0.0248535	-	-
BRD-K14268329	0.0248509
BRD-K87851508	0.0248503	-	-	3.63119
BRD-K81860076	0.0248477	-	-	4.53767
BRD-K63545954	0.0248432	ADRB2	Adrenergic receptor agonist	5.8805
BRD-K46805838	0.0248344	-	-
BRD-K48424967	0.0248215	-	-	4.41212
BRD-K89632963	0.0248196	ADRA1A, ADRA1B, ADRA1D	Adrenergic receptor antagonist	2.60626
chromomycin-a3	0.0248193
BRD-K96752129	0.0248141	-	-	2.96697
BRD-K51670762	0.024809	-	-	4.06343
BRD-K44713204	0.0248072	DOT1L	DOT1L inhibitor	0.979801
BRD-K21740361	0.0248067	-	-
BRD-K71254735	0.0248015	-	-	1.74524
BRD-K03552198	0.0247946	-	-	5.70798
BRD-K81104218	0.0247902	-	-	5.7442
BRD-K30653168	0.0247821	-	-	3.65065
BRD-K61053165	0.024781	-	-	3.34288
BRD-K62184784	0.0247806	-	-	6.36244
BRD-K65485797	0.0247678	-	-
BRD-K23173199	0.024758	-	-	3.84463
BRD-K94557542	0.0247526	-	-	3.21122
BRD-K47371343	0.0247508	CHRM1	Butyrylcholinesterase inhibitor, Cholinergic receptor antagonist	6.4155
fraxetin	0.0247412	-	-	3.98919
BRD-K86071888	0.0247397	-	-	3.30061
chlortetracycline	0.0247391	-	-	3.30494
NBQX	0.0247371	-	-	5.05755
BRD-K42333498	0.0247332	-	-	2.87134
latanoprost	0.0247187	-	-	4.6498
BRD-K30418433	0.024718	-	-	4.60473
BRD-K94672699	0.0247156	-	-	4.32716
BRD-K27540772	0.0247141	-	-	2.41753
BRD-K86584551	0.0247141	-	-
BRD-K93545352	0.0247135	-	-	4.74335
BRD-K57969360	0.0246976	-	-	3.89529
BRD-K81293413	0.0246975	-	-	1.89272
BRD-K70503895	0.0246959
BRD-K02065962	0.0246948	-	-	1.57778
BRD-K47512679	0.0246942	PIK3CD, PIK3CA, PIK3CG, MTOR, PIK3CB	PI3K inhibitor, MTOR inhibitor	2.58294
n-methylphenothiazine	0.0246929	-	-
BRD-K21139275	0.0246893	-	-	4.37718
hydroxyamphetamine	0.0246888	-	-	2.24686
BRD-K46300014	0.0246884	-	-	7.25357
BRD-K26018295	0.0246843	-	-	3.25471
BRD-K29143088	0.024675	-	-	3.1302
BRD-K14813771	0.0246616	-	-	2.9831
biotin	0.0246601	-	-	1.9454
BRD-K80439608	0.0246599	-	-	3.0034
BRD-K08394807	0.0246564	HDAC6	HDAC inhibitor	2.37662
BRD-K17968366	0.0246557	-	-	2.52068
flurofamide	0.0246532	-	-
BRD-K85951787	0.0246459	TP53	NFKB pathway inhibitor, TP53 activator, Cytokine production inhibitor	6.16256
BRD-K56870772	0.0246429	-	-	2.98706
ischemin	0.0246414	-	-	3.2279
BRD-K55115533	0.0246372	-	-	0.806977
BRD-K87959840	0.0246367	-	-	2.88216
BRD-K47143916	0.02463	-	-	4.73376
SA-246522	0.0246296	-	-	2.7715
BRD-K23103632	0.0246274	-	-
AT1-SHH-09	0.0246256	-	-	2.45807
BRD-K10847374	0.0246253	-	-	3.56222
BRD-K91876603	0.0246175	-	-	4.2191
BRD-K49103797	0.0246145	-	-	3.55808
BRD-K72490684	0.024611	-	-	4.80954
BRD-K77983109	0.0246075	-	-	4.66259
BRD-K73680494	0.0246067	-	-	4.50514
BRD-K72609445	0.0246049	-	-
BRD-K55316222	0.0246033	-	-
AT-CSC-18	0.0246032
BRD-K76645599	0.0246032
geranylgeraniol	0.0246004	-	-	3.42039
BRD-K11054031	0.02459	-	-	3.95601
BRD-K35462787	0.0245885	PTGS1	Opioid receptor agonist, Cyclooxygenase inhibitor	3.87478
BRD-K57902493	0.0245826	-	-
BRD-K12385780	0.0245806	-	-	4.47467
BRD-K23958338	0.0245756	-	-	2.66839
BRD-K84741596	0.0245748	-	-	2.9587
flurandrenolide	0.0245701	ATP1A1	ATPase inhibitor	0.336376
BRD-K02549628	0.0245682	-	-	2.48772
BRD-K34710061	0.0245627
BRD-K93130549	0.0245607	-	-	4.93567
BRD-K80996561	0.0245565	-	-	3.30306
BRD-K61484491	0.0245477	-	-
BRD-K21838437	0.0245409	-	-	3.63595
BRD-K95896215	0.0245404
BRD-K91440401	0.0245314	-	-	5.68887
BRD-K28139946	0.0245295	-	-	2.42714
BRD-K67507121	0.0245266	-	-	3.99532
BRD-K66590796	0.0245259	-	-	3.10981
BRD-K61531144	0.0245235	-	-	3.55403
BRD-K61247793	0.0245229	-	-	2.75032
BRD-K56603522	0.0245229	-	-
BRD-A21812217	0.0245214	-	-	2.55373
BRD-K15651660	0.0245214	-	-	3.42962
BRD-K18970629	0.0245157	-	-	1.8282
BRD-K23001296	0.0245099	-	-	4.0996
BRD-K16940042	0.0245079	-	-
BRD-K65309966	0.0244976	-	-	4.19597
BRD-K80472040	0.0244948	-	-	4.68743
clomipramine	0.024491	-	-	2.65425
BRD-K54751293	0.0244869	-	-	3.00444
BRD-K15980298	0.0244841	HTR2C	Serotonin receptor antagonist	4.38867
BRD-K78130859	0.0244794	-	-	3.57655
BRD-K36171309	0.0244771	-	-	4.07064
BRD-K09059658	0.0244761
BRD-K96615474	0.0244727	-	-	5.18781
BRD-K89362730	0.0244689	FLI1, DHX9	Binding of RNA helicase A to the transcription factor EWS-FLI1 inhibitor, Apoptosis stimulant	4.08885
JAS07-010	0.0244649	-	-	2.91246
U-0124	0.0244641	-	-
baricitinib	0.0244631	-	-	4.27224
isosilychristin	0.0244572	-	-
BRD-K43540029	0.0244546	-	-	3.34868
BRD-A61864215	0.0244526	-	-
BRD-K67887361	0.0244515	-	-	3.04939
ibudilast	0.0244482	-	-
BRD-K96147838	0.0244421	SLC8A1	Sodium/calcium exchange inhibitor	4.28207
BRD-K03035008	0.0244348	-	-
baicalin	0.0244283	-	-	4.38567
BRD-K27744061	0.024419	-	-
BRD-K74185228	0.0244144	-	-	3.54304
BRD-K73841784	0.0244125	-	-	4.60978
BRD-K43807558	0.0244088	-	-	3.60611
BRD-K72833997	0.0244043	-	-	2.14156
BRD-K32271530	0.0244036	-	-	3.5928
BRD-K35376105	0.0243974	-	-	2.60492
BRD-K92912836	0.0243923	-	-	1.45585
BRD-K71216533	0.0243855	-	-	3.35575
BRD-K69659917	0.0243843	-	-	3.10761
BRD-K74779337	0.0243818	-	-
BRD-K15111910	0.0243793	HTR1D, HTR1B	Serotonin receptor agonist	4.82363
BRD-K85976669	0.0243774	-	-
BRD-K63603058	0.0243733	-	-
BRD-K25774147	0.0243732	-	-	1.88634
AZ-628	0.0243674	-	-	3.73262
BRD-A69127847	0.0243659	-	-
BRD-K70924576	0.0243619	AURKA	Aurora kinase inhibitor	4.08625
BRD-K18294324	0.0243552	DDR1	Ephrin inhibitor	3.42312
BRD-K05076357	0.0243507	-	-	4.20888
BRD-K56258950	0.0243411	MTOR	MTOR inhibitor	2.68779
trimetozine	0.024341	-	-
BRD-K96343889	0.0243373	-	-	4.85577
BRD-K80736363	0.0243337	-	-	2.67263
darusentan	0.0243336	DRD3, DRD2, HTR2A	Dopamine receptor antagonist	4.44525
BRD-K81826010	0.024332	-	-	4.05074
BRD-K96061818	0.0243304	-	-
PD-184352	0.0243292	-	-	4.20229
KU-C103881	0.0243257	-	-	3.05804
BRD-K08266813	0.0243249	-	-	3.7904
BRD-K71194915	0.0243208	-	-	2.67138
BRD-K06624861	0.0243191
BRD-K03591925	0.0243137	-	-	3.03169
BRD-K98044070	0.0243133
BRD-K54576503	0.0243098	-	-	2.78276
BRD-K87840555	0.0243063	-	-	1.84514
BRD-K74919500	0.0243037	-	-	3.25487
BRD-K93519076	0.0243026	-	-
BRD-K48069820	0.0242996	-	-	2.85857
BRD-K62657501	0.0242974	-	-
BRD-K02334683	0.0242965	-	-	3.5796
BRD-K17753780	0.0242942	GABRA6, GABRA5, GABRA3	GABA receptor modulator	4.01152
sparfosic-acid	0.0242941	-	-	2.00303
quiflapon	0.0242914	-	-	3.59455
BRD-K41666683	0.0242899	-	-	4.53368
BRD-K74144406	0.0242862	-	-	2.91904
BRD-K85741537	0.0242855	-	-
BRD-K44194212	0.0242832	-	-	3.5683
BRD-K25784575	0.0242829	-	-	6.89896
BRD-K61877191	0.0242826	-	-	3.84349
BRD-K61881697	0.0242808	-	-
BRD-K29335396	0.0242658	-	-	3.52743
BRD-K61821542	0.0242634	-	-	3.51464
BRD-K35668999	0.024258	-	-	3.98435
BRD-K99702099	0.0242516	-	-	3.03415
BRD-K34957967	0.02425	-	-	4.41154
BRD-K27363274	0.0242482	-	-	3.79418
BRD-K59239976	0.024247	-	-	4.80954
nafcilline	0.0242464	-	-
BRD-K04516579	0.0242431
BRD-K57580310	0.0242429	-	-	3.73631
BRD-K77100270	0.0242393	-	-	1.68992
BRD-K19231873	0.0242375
BRD-K76609014	0.0242353	-	-	3.75188
BRD-K06877934	0.0242347	-	-	5.70089
BRD-K79025148	0.0242343	-	-	2.55431
BRD-K06451913	0.0242343	-	-	7.09758
BRD-K73952419	0.0242302	-	-
BRD-K11914584	0.0242263	-	-	4.31282
SA-440772	0.0242254	-	-	8.51684
BRD-K41009039	0.0242226	-	-	5.40578
BRD-K76510844	0.0242216	-	-	3.11318
BRD-A29578214	0.0242181	-	-	3.51464
AZD-9668	0.024218	-	-	3.14599
BRD-K25187028	0.0242106	-	-	3.60136
BRD-K90671064	0.0242034	-	-	3.28675
SB-415286	0.0241961	-	-	3.10536
BRD-K96560179	0.0241948	-	-	5.19252
ciprofloxacin	0.0241944	-	-	1.97072
BRD-K12189280	0.0241922	-	-	1.55766
BRD-K86728684	0.0241917	-	-	5.05292
carbacyclin	0.0241897	-	-
BRD-K35828963	0.0241835
BRD-A68202111	0.0241799	-	-	2.97911
BRD-K34898990	0.0241682	-	-	5.9129
BRD-K44756290	0.0241622	-	-
BRD-K31393518	0.0241567	-	-	2.7696
favipiravir	0.0241533	-	-	3.50438
BRD-K94676520	0.0241481	-	-	2.91318
BRD-K49333293	0.0241458
PP-3	0.0241374	-	-
BRD-K51061297	0.0241361	-	-	3.80322
BRD-K39913135	0.0241355	TRPV1, CNR1, CNR2	Cannabinoid receptor agonist	4.10548
BRD-K26954478	0.0241303	-	-	2.96113
BRD-K73143149	0.02413	-	-
cefepime	0.0241267	-	-	3.53827
BRD-K32582260	0.0241264	-	-	2.38413
BRD-K00631971	0.0241217	-	-	3.36453
BRD-K92522487	0.0241184	-	-
ibuprofen-piconol	0.0241164	-	-	1.99922
BRD-K64729807	0.0241153	-	-
BRD-K54053991	0.0241128	-	-	3.7376
BRD-K18793708	0.0241082	-	-	6.45907
L-701252	0.024108	-	-	2.87957
tetrachloroethylene	0.0241043	-	-	2.95974
BRD-K89122173	0.0240921
BRD-K06592610	0.02409	-	-	3.29918
BRD-K35462725	0.0240872	-	-
BRD-K87080069	0.024082	-	-
BRD-K77787814	0.02408	-	-	2.17981
BRD-K38118226	0.0240766	NR3C1	Corticosteroid agonist, Glucocorticoid receptor agonist	2.4272
BRD-K29418729	0.0240672	-	-	2.66515
BRD-K18229142	0.0240519	-	-
BRD-K26759399	0.0240515	-	-	2.47186
BRD-K42419294	0.0240469
BRD-K43484121	0.0240392	-	-	3.18604
diphenylpyraline	0.0240373	-	-	3.29184
BRD-K87261428	0.0240334	-	-	2.38342
BRD-K61599229	0.0240312	-	-	3.81866
BRD-K65561930	0.0240224	-	-
BRD-K47508820	0.0240211	-	-	3.02517
BRD-K45747555	0.0240187	-	-	2.14602
BRD-K50617795	0.0240084	-	-	2.91166
BRD-K35978846	0.0240076	-	-	3.79462
citrinin	0.0240076	-	-	2.64665
bethanechol	0.0240057	-	-	2.21569
BRD-A06131576	0.0240045	-	-
BRD-K87967185	0.0239953	-	-	3.22175
BRD-K51034923	0.023994	-	-
BRD-A47416464	0.0239863	-	-	3.07231
BRD-K85965830	0.0239842	HIF1A	HIF modulator	3.16155
BRD-K34931072	0.0239814	-	-	5.57414
RK-682	0.0239791	-	-	2.6007
nitrendipine	0.0239699	-	-	6.02644
BRD-K63602071	0.0239576	-	-	4.49574
BRD-K35584941	0.023957
BRD-K62369921	0.0239516	-	-	3.49675
BRD-K55082119	0.0239467	-	-	2.66232
BRD-K76985713	0.0239466	-	-	3.63556
BRD-K13085116	0.0239445	-	-
BRD-K56240103	0.0239401	-	-	2.90839
BRD-K77320816	0.0239377	-	-	1.9217
BRD-K92884779	0.0239347	-	-	1.85593
BRD-K64825005	0.0239339	-	-	8.05783
BRD-K30964167	0.0239252	-	-	1.614
BRD-K33606963	0.023921	-	-
BRD-K64111129	0.023915	-	-	4.19282
BRD-K20039572	0.0239147	-	-	2.55924
BRD-K77432048	0.0239137	ATM	ATM kinase inhibitor	1.50249
BRD-K91766181	0.0239136	-	-	3.56846
BRD-K45817496	0.0239107	-	-	5.18885
BRD-K76829357	0.0239083	-	-	2.98481
BRD-K91237281	0.0238999	-	-	3.71119
SA-1920683	0.0238923	-	-	2.97566
BRD-K70543679	0.023889	-	-
PT-630	0.0238884	-	-	3.24073
BRD-K75583553	0.0238799	-	-	3.18129
BRD-K01409032	0.0238785	-	-	4.58059
BRD-K46949676	0.0238725	-	-	4.53426
BRD-K23196166	0.0238714	-	-	2.88662
BRD-K27824357	0.0238675
BRD-K28623651	0.0238663	-	-	2.56938
BRD-K54141118	0.0238558
BRD-K00611064	0.0238542	-	-	8.14277
BRD-K17979415	0.0238486	-	-	3.12515
BRD-K84679731	0.0238399	-	-	3.00793
5-FP	0.0238375	-	-	4.17089
BRD-K63583636	0.0238362	-	-	4.83311
BRD-K36709933	0.0238354	-	-
BRD-K45057266	0.0238247	PKD2L1	TRPV antagonist	1.99453
BRD-K99842945	0.0238217	-	-	3.18129
BRD-A01717918	0.0238203	-	-	3.32427
BRD-K60636255	0.0238043	-	-	3.23301
MR-16728	0.0237999	-	-
butabindide	0.0237989	-	-	3.40106
BRD-K16062794	0.0237953	-	-
BRD-A69383366	0.0237946	-	-	6.34352
BRD-K45582470	0.0237905	-	-	4.73664
BRD-K16689648	0.0237903	-	-	6.07818
BRD-K03028122	0.023788	-	-	4.5098
BRD-K50990408	0.0237857	-	-
BRD-K23961390	0.0237814	-	-	2.54753
BRD-K75900952	0.0237807	-	-
BRD-K09796735	0.0237747	-	-	1.99963
BRD-K54476947	0.0237728	PDE3B, PDE3A	Phosphodiesterase inhibitor	4.5463
BRD-K27962962	0.0237723	-	-	3.56885
BRD-K32078195	0.0237713	-	-	3.82739
BRD-K88086273	0.0237656	-	-	4.16114
BRD-K79610347	0.02376	-	-	4.63674
isamoltane	0.0237589	-	-	1.5634
[truncated: 31,611 more rows]

## Sheet: Supplementary Table 6
Supplementary Table 6. Small molecule prioritization scores base on the s2 signature (IRS2, RMND5B, DCTN5, CLEC4E) and single-gene signatures with annotation from L1000 SigCom LINCS Metadata and BBB scores*.
drug	s2	DCTN5	CLEC4E	IRS2	RMND5B	target	moa	BBB score
BRD-K38385428	0.0423774	0.0110839	0.00243725	0.0646388	0.00659493	-	-	3.83562
BRD-A02726762	0.0411088	0.0031477	0.00287436	0.0645049	0.0116907	-	-	2.3075
BRD-K09398529	0.0401015	0.0117835	0.00333137	0.0532906	0.0117975	-	-	3.76806
BRD-K29466595	0.0392531	0.00929413	0.00653145	0.0618404	0.00084026	-	-	4.53966
BRD-K36826042	0.038826	0.00205091	-0.00327005	0.0731559	0.0057152	-	-	3.75809
BRD-K69594935	0.0387938	0.00537138	0.00971748	0.0576169	0.00488196	-	-	2.87134
BRD-K53943097	0.0386115	0.0128374	0.00512952	0.0518724	0.00738364	-	-	3.78144
BRD-K12341671	0.038429	0.011503	0.00182846	0.054528	0.00899862	-	-	7.0211
BRD-K45932120	0.0378868	0.00152834	0.00662031	0.0620222	0.00560268	-	-	7.48709
BRD-K61439686	0.0377272	0.0155191	0.005515	0.0547157	-0.00029526	-	-
MW-STK33-4C	0.0376878	0.0108638	-0.00226397	0.0661413	0.000634418	-	-	4.49035
BRD-K40155511	0.0373786	0.00454064	-0.000223839	0.0629621	0.00747831	HRH1	Histamine receptor antagonist	9.67117
BRD-K47417426	0.037146	0.00714048	0.00758421	0.0609739	-0.00140654	-	-	3.20777
BRD-A31962514	0.0368713	0.0182237	0.00546142	0.0277124	0.0223451	-	-	2.37694
BRD-K93126086	0.0367058	0.0113942	0.00543921	0.0524209	0.00415722	-	-	2.73902
BRD-K06148713	0.036449	0.0143027	0.00256915	0.0525489	0.00347715	-	-	2.39282
BRD-K24226959	0.0363582	0.00918971	0.00248404	0.0478102	0.0132325	-	-	3.33768
BRD-K02638906	0.0361232	0.00531651	-0.00261166	0.0606013	0.00894019	-	-
BRD-K17107214	0.0359671	0.00877781	0.00868576	0.0513433	0.00312736	-	-	3.07709
acetylcholine	0.0358415	-0.00337403	0.00188777	0.0685464	0.00462286	-	-	2.5581
PF-3845	0.0357604	0.00193968	0.00447895	0.0476842	0.017418	-	-	5.75139
BRD-K83244979	0.035528	0.0148254	0.00196178	0.0513058	0.00296311	-	-	2.97821
BRD-K19405573	0.0354909	0.00819123	0.00498664	0.0515996	0.00620431	-	-	4.57656
BRD-K51457407	0.0352247	-0.00400067	0.00751112	0.0541981	0.0127409	-	-	2.66515
BRD-K06577881	0.0350018	0.00993278	0.00159385	0.0567195	0.00175746	-	-	2.96538
BRD-K49673270	0.0348922	0.00772005	0.00582869	0.0571476	-0.00091188	MAOB	Monoamine oxidase inhibitor	6.66933
BRD-K52341452	0.0344147	0.0129932	0.00369782	0.0310105	0.0211279	-	-	3.84171
BRD-K70838368	0.0343426	0.012666	0.00365518	0.05036	0.00200399	-	-	1.38065
BRD-K49872883	0.0342449	0.00609016	0.00795572	0.0567276	-0.00228372	-	-	3.02431
BRD-K10882151	0.0342069	0.00390306	0.00436956	0.0514174	0.00872387	-	-	4.31518
SANT-1	0.0335782	0.0151808	-0.00283175	0.0465556	0.00825185	-	-	4.89206
BRD-K73969016	0.0333903	0.00383929	0.00700483	0.0482441	0.00769242	-	-
efatutazone	0.0333843	0.00180533	0.00445102	0.0596853	0.000826926	-	-	3.22161
BRD-K13673722	0.0333407	0.00611412	0.00511692	0.0493414	0.00610891	-	-
BRD-K79712504	0.0333257	0.0119033	0.00477901	0.0462381	0.00373102	-	-	6.94673
BRD-A31916785	0.0331162	0.0205764	0.00272229	0.0249079	0.0180257	-	-	5.08381
BRD-K46293468	0.0330852	0.0064467	0.00499912	0.052103	0.00262152	-	-	7.25898
BRD-K12017137	0.03305	0.00893743	0.00587896	0.0379897	0.013294	-	-	4.55121
BRD-K11238413	0.0330261	0.0154351	0.0055781	0.0264999	0.0185392	-	-
BRD-K55841827	0.0329756	0.00949885	0.00047026	0.0488037	0.00717839	-	-
BRD-K47445962	0.0329293	0.00533835	0.00714169	0.0541312	-0.00075262	-	-	3.74736
damnacanthal	0.0329293	0.00694033	0.00757839	0.0494078	0.00193206	-	-	2.71845
BRD-K99048639	0.032922	0.0097908	0.00183967	0.0423297	0.0118839	-	-	4.50123
BRD-K96625719	0.0328427	0.013879	0.00368835	0.0462379	0.00188008	-	-	4.72207
BRD-K49662642	0.0328372	0.00703949	0.00661905	0.0523147	-0.00029885	-	-	6.2033
BRD-K28700379	0.0327885	0.00624629	0.00663672	0.0492819	0.00341218	-	-	3.71954
BRD-A42433574	0.0326826	0.0044222	-0.0026631	0.0504343	0.0131717	IDO1	Indoleamine 2,3-dioxygenase inhibitor	4.07126
BRD-K67484361	0.0325973	0.00991164	0.00276389	0.0433728	0.00914631	-	-	4.27224
BRD-K60216304	0.0325952	0.00327258	0.00164935	0.0507422	0.00952626	-	-	2.37229
BRD-K51185182	0.0325917	0.00612153	0.00839533	0.0523253	-0.00165874	-	-	3.59938
BRD-K35133923	0.0325699	0.00920399	0.00607466	0.0533764	-0.00351533	-	-	1.34604
enoximone	0.0325297	0.0044373	0.00707519	0.0491567	0.00439014	-	-	3.25487
SKF-77434	0.0325142	0.00653989	0.00262643	0.04588	0.00998204	-	-	3.97376
BRD-K39419290	0.0324741	0.00427831	0.00863864	0.0444468	0.00758442	-	-
BRD-K56034970	0.0322868	0.00813722	0.00014257	0.0483225	0.0079712	-	-	1.45585
BRD-K85118298	0.0322423	0.00800834	0.000495417	0.0474774	0.00850347	-	-	7.2271
myriocin	0.0321558	0.0101807	0.00190882	0.0478486	0.00437351	-	-	8.21177
BRD-K80408519	0.0321069	0.00453895	-0.00375183	0.0516493	0.0117773	-	-	3.79462
BRD-K74109014	0.0320408	0.00870467	0.00481217	0.0430614	0.00750339	-	-	3.29307
BRD-K72014243	0.0319096	0.0105307	0.00423088	0.0434538	0.00560396	-	-	3.53827
BRD-K02206127	0.0318571	0.00568954	0.00424559	0.0454547	0.00832437	-	-	2.30996
BRD-K48338059	0.0317977	0.00319858	0.0105945	0.0489634	0.000839	-	-	4.23151
BRD-A85234536	0.0317577	0.00744219	-0.000441536	0.0610515	-0.00453665	-	-	3.35879
BRD-K02809100	0.0317528	0.00417599	0.00546511	0.0406024	0.0132622	-	-	4.80954
BRD-K11010670	0.0317402	0.00765773	0.00372249	0.0361786	0.0159217
BRD-K36513323	0.0317216	0.00606039	0.00945257	0.0366396	0.0112906	-	-	2.56497
BRD-K35848924	0.0317007	0.0061478	0.00013453	0.047154	0.00996499	-	-	2.31318
BRD-K65183353	0.0316257	0.00371091	0.00575957	0.0449942	0.00878675	-	-
BRD-K35119180	0.0315463	0.0039734	0.0074432	0.0512045	0.0004715	-	-	3.38564
BRD-K51392039	0.0314968	0.0110934	0.00277994	0.0345648	0.0145555	-	-	4.11855
BRD-K67715154	0.031496	0.00481884	0.00677649	0.0391553	0.0122413	-	-	1.5538
BRD-K54637865	0.0314856	0.00541663	0.00997035	0.0350093	0.0125749	-	-	3.24553
BRD-K18519621	0.0314777	0.0157042	-0.00157792	0.042356	0.00647309	-	-	4.35503
BRD-K06403738	0.0314079	0.00360727	0.0064587	0.0480197	0.00473007	-	-	3.19637
BRD-K02694971	0.0313974	0.000733795	0.000165088	0.0614902	0.000405592	-	-	1.77242
BRD-K35639494	0.0313782	0.00967311	0.00487857	0.033868	0.0143366	-	-	2.00476
BRD-K64668459	0.031343	0.0116093	0.00349906	0.0432944	0.00428327	-	-	4.32607
enflurane	0.0313231	0.0135319	0.00340494	0.0466136	-0.000904139	ABL1, BCR	Abl kinase inhibitor	2.17017
BRD-K02206783	0.0313132	-0.00150811	0.00532437	0.0506206	0.00818951	-	-	3.3573
BRD-K68202226	0.0313079	0.00324177	0.00632659	0.0383815	0.0146659	-	-	3.5928
BRD-K12936425	0.0312574	0.0120239	0.00229497	0.0449191	0.00327691	-	-	2.23361
BRD-K63716333	0.0312178	0.0182256	0.00361231	0.0362329	0.00436484	-	-	3.41909
BRD-K25942808	0.0312001	0.00054842	0.00929516	0.0514205	0.00113608	-	-
BRD-K17854785	0.0311999	-0.00333345	0.00823624	0.0498446	0.00765231	-	-	6.42236
BRD-K32294814	0.0311522	0.00885855	-0.00245532	0.0388602	0.017041	-	-	3.49566
BRD-K74663731	0.0311481	0.00242189	0.00572152	0.0405805	0.0135723
aniracetam	0.0310857	0.0043932	-0.000787931	0.0470514	0.0115147	-	-	1.65886
BRD-K94267488	0.0310598	-0.00268003	0.00861362	0.0590949	-0.00290884	KEAP1	Kelch-like ECH-associated protein ligand	4.06408
BRD-A07944983	0.031024	0.00350061	0.00951245	0.0428034	0.00623162	-	-	2.10964
BRD-K20530300	0.0309467	0.0117516	0.00448692	0.0314176	0.0142372	-	-
BRD-K21317335	0.030911	0.00635705	0.0107081	0.038131	0.00662584	-	-	4.96817
BRD-K09166899	0.030805	0.0121932	0.00197561	0.037008	0.0104332	-	-	3.84869
BRD-K13648806	0.030793	0.00958525	-0.00349937	0.0496143	0.00588574	-	-
BRD-A94494639	0.0307598	0.0074921	0.0115686	0.0323066	0.0101523	-	-	3.03845
BRD-K57902040	0.030759	0.00902271	0.00411928	0.0389004	0.00947563	-	-	2.49775
liothyronine	0.0307301	0.00877443	-0.00219705	0.0466873	0.00819549	-	-	2.70327
BRD-K63468420	0.0306744	0.00326565	0.00757181	0.0353853	0.015126	-	-
BRD-K13275816	0.0306699	0.00812362	0.00499283	0.0405049	0.0077184	-	-	3.84349
NSC-119889	0.0306578	0.00817063	0.000768716	0.050097	0.00227925	-	-	3.63595
BRD-K22387508	0.0306471	-0.0023859	-0.000450297	0.0612047	0.00292564	-	-	2.90728
disopyramide	0.0306112	0.00805318	0.00125347	0.0488942	0.00302144	-	-	2.56776
BRD-K80679698	0.0305426	0.00812506	0.00198603	0.0511576	-0.00018352	-	-	2.93389
deguelin	0.0305275	0.00140559	-0.00116388	0.0433537	0.0174596	-	-
BRD-K86483825	0.0305168	0.00650513	0.00093844	0.0403057	0.0132843	-	-	2.4443
BRD-K58340898	0.0305111	-0.00673773	0.00192537	0.059777	0.00605754	-	-	3.64896
BRD-K18600476	0.0304957	0.00430046	0.00197425	0.0427246	0.0119922	-	-	3.96853
BRD-K46544760	0.030487	0.000212055	-0.00251845	0.0529628	0.0103176	-	-	2.57752
cefazolin	0.0304393	0.0117446	-0.00146137	0.056865	-0.00626967	-	-	4.06411
BRD-K97489107	0.0304087	0.00860209	-0.00548696	0.0556732	0.00202893	-	-	2.6933
BRD-K35799753	0.0303693	0.00672613	0.00561511	0.0422325	0.00616475	-	-	5.88554
BRD-K89216747	0.0303594	0.00717658	0.00648357	0.0398353	0.00722326	-	-	5.85809
BRD-K32485819	0.0303363	0.00876975	0.00556739	0.0300573	0.0162783	-	-	4.54782
BRD-K57937572	0.0302991	-0.0004644	0.00817734	0.0453192	0.0075661	-	-	3.99609
BRD-K71733437	0.0302989	-0.00223019	0.002014	0.0535659	0.00724811	-	-	4.45219
NK42-I-109-1	0.0302888	0.0136493	-0.00456355	0.0409219	0.01057	-	-	2.75913
BIBR-1532	0.0302308	-0.00274157	-0.00234729	0.0589573	0.00659324	-	-	3.12446
NPK76-II-72-1	0.030212	0.00121988	-0.000546302	0.0511336	0.00861681	-	-
BRD-K70875408	0.0302102	-0.000328623	0.000922162	0.0468519	0.012975	-	-
ZM-336372	0.0301943	-0.00472152	0.000434084	0.0570184	0.0076576	-	-	3.5123
BRD-K60543885	0.030188	0.00657311	0.0058639	0.0428625	0.00507647	-	-	1.47071
BRD-A06232236	0.0301707	0.0157988	0.00693986	0.0235232	0.0140796	-	-
BRD-K32656671	0.0301462	0.010958	-0.00483154	0.0510204	0.00314555	-	-	2.23157
BRD-K92795658	0.0301019	0.0170387	0.00277425	0.0310133	0.00937757	-	-	2.73452
BRD-K25600773	0.0300603	0.013965	0.00102369	0.037036	0.0080959	-	-	1.84863
BRD-K08476323	0.030057	0.00663543	0.00397152	0.031499	0.0180081	-	-	1.99963
BRD-K63086103	0.0300342	0.0110139	0.00326954	0.0332951	0.0124898	-	-
BRD-K95789946	0.0300099	0.00565381	0.00405916	0.0517125	-0.00140577	-	-
BRD-K06449093	0.0300086	-0.00115086	0.00599406	0.0495744	0.00559951	-	-	3.24525
BRD-K89142472	0.030006	0.0123289	-0.00204895	0.0383188	0.0114132
BRD-K98481427	0.0299396	0.00177198	0.00732881	0.0492596	0.00151876	-	-	3.30623
BRD-K10768305	0.0299388	0.00589306	0.000538343	0.0521228	0.00132335
BRD-K29936219	0.029888	0.0105357	0.00250787	0.0351344	0.011598	-	-	3.29469
BRD-K52436508	0.0298622	0.00640809	0.00622765	0.0500588	-0.00297017	-	-	3.18008
dalcetrapib	0.0298268	0.0152675	0.00224611	0.0383258	0.00381424	-	-	1.9864
BRD-K20329507	0.0297889	0.0119337	0.00328742	0.0271735	0.0171832	PPP2CA, PPP1CA	Protein phosphatase inhibitor	0.816016
BRD-K67638302	0.0297838	0.0048909	0.00083808	0.0328253	0.0210132	PIK3CA	PI3K inhibitor	3.72218
BRD-K06127304	0.029767	0.0102342	-0.00254523	0.0366735	0.0151715	-	-	5.00901
fenigam	0.0297511	0.0120694	-0.000270082	0.0360067	0.0116961	-	-	4.26288
BRD-K72529818	0.0297016	0.0137535	0.000907019	0.0386217	0.00612097	-	-	3.00448
BRD-K15719180	0.0296932	-0.0111612	0.00868463	0.0475579	0.0143051	-	-	3.02043
BRD-K13849015	0.0296884	0.00633829	0.000972882	0.0285191	0.0235466	-	-
BRD-K83448282	0.0296594	0.0093946	0.000310716	0.0440445	0.00556885	-	-	2.60756
BRD-K86623758	0.0296463	0.0114324	0.00553136	0.0296838	0.0126451	-	-	3.12724
BRD-K37696710	0.0296286	0.005134	0.00655999	0.0420896	0.00547366	-	-	6.6545
BRD-K19710723	0.029626	0.0104123	-0.00096263	0.0427649	0.00703748	-	-	4.2355
BRD-K97399889	0.0295921	0.00834979	0.000557174	0.041193	0.00908419	-	-	3.12724
BRD-K12925598	0.0295637	0.0116438	-0.00029891	0.0398499	0.00793255	-	-	1.74141
BRD-K64182862	0.0295221	0.01111	0.00015502	0.0394277	0.00835163	-	-
BRD-K42679620	0.0295179	0.0125268	0.00615079	0.0304681	0.00989008	-	-	6.67544
BRD-K54081441	0.029513	0.00677094	0.00304613	0.0476086	0.00160029	-	-	5.46038
BRD-K89284683	0.0294802	0.0073818	0.00530067	0.0353163	0.0109617	-	-	3.2688
BRD-K93472147	0.0294491	0.0146508	-0.00062009	0.0469202	-0.00205284	-	-
BRD-K34311178	0.0293762	0.00586126	0.00223024	0.0533235	-0.00266262	-	-	2.31763
IOX2	0.0293544	0.0173217	-0.00327735	0.0439808	0.000683644	-	-	1.84514
BRD-K01359264	0.0293425	0.00612603	-0.00737624	0.0506248	0.00931034	-	-	2.37758
BRD-K46162352	0.0293077	0.00652942	0.00249219	0.0485451	0.00104875	-	-	2.15094
deoxycorticosterone-acetate	0.0292921	0.00864479	-0.00544194	0.0517359	0.00364552	-	-	3.2467
BRD-K45347683	0.0292919	0.00775395	-0.0013787	0.0479066	0.00430192	-	-	2.87957
tetramisole	0.0292864	0.00664089	-0.00473693	0.057642	-0.000973157	-	-
BRD-K21009077	0.0292369	0.00425972	0.000153156	0.0437565	0.0103043	-	-	2.5581
BRD-K87080232	0.029222	0.00550028	0.00629163	0.0391724	0.00747975	-	-	1.3376
BRD-K19474742	0.0292083	0.00711223	0.00208642	0.0343988	0.0148191	-	-	4.16085
BRD-K29162128	0.0291992	0.00508889	-0.00119377	0.0554944	-0.000991034	-	-	3.53827
BRD-K30684242	0.0291916	0.0104105	-0.00180545	0.0476316	0.00214654	-	-
SA-1920013	0.0291865	0.0105675	-0.0026455	0.0341781	0.016273	-	-	3.59486
BRD-K55581069	0.0291774	0.00607095	0.00346106	0.0455599	0.00326294
BRD-K05078233	0.0291404	0.00956141	-0.00343329	0.0487546	0.00339817	-	-
batimastat	0.0291393	-0.000444478	0.00118854	0.048944	0.00859042	-	-	3.38151
BRD-K16238077	0.0291363	0.00780197	0.00319442	0.0317069	0.0155693	-	-
BRD-K46726368	0.0291162	0.00443142	0.00152599	0.0354946	0.0167804	-	-	3.55011
BRD-K37562700	0.0291046	0.00305497	-0.000230474	0.0461692	0.00921549	-	-
BRD-K27889081	0.0290399	0.0038756	0.00423314	0.0461082	0.00386288	-	-
BRD-K01570637	0.0289663	0.0134378	0.00228042	0.0378781	0.00433625	-	-	2.90568
BRD-K26929400	0.0289382	0.00185762	-0.00601509	0.0511525	0.0108814	AR	Androgen receptor agonist	7.88016
BRD-K07473223	0.0289192	0.00619076	0.0130494	0.0222761	0.0163222	-	-	3.05689
BRD-K75325409	0.0288944	0.00849072	0.00204275	0.031861	0.0153943	NR3C1	Glucocorticoid receptor agonist	2.53936
BRD-K10459843	0.0288786	0.00302872	0.00793039	0.0370843	0.00971373	-	-
BRD-A12166214	0.0288683	0.0164483	0.00408469	0.0228182	0.0143854	-	-	3.29378
BRD-K99383477	0.0288399	0.0018991	0.0102212	0.0399905	0.00556897	-	-	8.04199
BRD-K01626580	0.0288334	0.00313639	-0.000270769	0.0474719	0.0073292	-	-	3.64752
BRD-K63401627	0.0288318	0.0127379	0.00119225	0.0337555	0.00997786	-	-	4.11316
BRD-K79596575	0.028815	0.013624	0.00243919	0.0436074	-0.00204054
BRD-K56384677	0.0288118	0.00965578	0.00849708	0.0344874	0.00498338	MCL1, BCL2, BCL2L1	BCL inhibitor	1.23142
BRD-K11528380	0.0288118	0.000220926	0.0044209	0.0482134	0.00476839	-	-	3.04019
BRD-K27452769	0.0287736	0.00979399	0.00927557	0.0400474	-0.00156964	-	-
BRD-K93800099	0.0287493	-0.00765174	0.00525356	0.0501875	0.00970933	-	-	3.12724
BRD-K24312231	0.0287462	0.00464591	-0.00211743	0.0469392	0.00802475	-	-	2.09092
BRD-K79619334	0.0287444	0.00788046	0.00724165	0.0253738	0.0169929	-	-	5.39194
BRD-K61551681	0.0287401	0.00045783	0.00416005	0.0447132	0.00814916	-	-	4.24681
BRD-K21771537	0.0287091	0.00527014	0.00309716	0.0336593	0.0153916	-	-
BRD-K98842254	0.0287078	0.00618239	0.00397907	0.0464459	0.000808162	-	-	6.62742
BRD-K43029808	0.0287065	0.00746178	0.00539203	0.0304737	0.0140854	-	-	3.42064
BRD-K73837493	0.0286817	0.00127067	0.00589277	0.0407566	0.00944339
BRD-K20288742	0.0286287	0.00961513	0.004346	0.0292148	0.0140814	-	-	2.61199
BRD-A09115727	0.0286106	0.0109344	0.00931991	0.0323303	0.00463669	-	-	2.40573
BRD-K58498516	0.0285849	0.00900792	-0.00096799	0.0526868	-0.00355688	-	-	1.85052
SD-208	0.0285679	0.00029815	0.00842737	0.0428395	0.00557082	-	-	3.12724
BRD-K80101280	0.0285602	0.00582003	0.00149611	0.0518573	-0.00205307	-	-	4.08762
BRD-K23960050	0.0285592	0.00604182	0.0100818	0.0348278	0.00616705	-	-	2.41246
BRD-K54023716	0.0285575	0.00636613	0.0003187	0.0335491	0.0168811	-	-	3.95216
hydroxyurea	0.0285321	0.00963442	0.00304808	0.0453864	-0.0010048	-	-	3.53827
BRD-K08993600	0.0285299	-0.00303012	0.00518503	0.0507513	0.00415366	-	-
BRD-K93460493	0.0285259	0.00373578	0.00877766	0.0326436	0.0118948	-	-	4.75384
BRD-K53814023	0.0285201	0.00618048	0.00258142	0.0380456	0.0102327	-	-	3.66985
BRD-K73650939	0.0285192	0.00259445	0.00582062	0.0373908	0.0112324
BRD-K77011363	0.0285137	0.00914913	0.00022269	0.0386201	0.00903542	-	-	3.92749
BRD-K53548223	0.0285123	0.00320135	0.00495678	0.0358589	0.0130076	-	-
BRD-K99529078	0.0285103	0.00182421	0.00931909	0.0345634	0.0113138	-	-
BRD-K80832690	0.0284993	0.00986935	-0.00497292	0.0547472	-0.00264497	-	-	6.63585
BRD-K25380050	0.0284917	0.00167402	-0.000173272	0.0488746	0.00660796	-	-	2.36807
BRD-K49995660	0.0284784	0.0032429	0.00271907	0.0374737	0.0135211	-	-
BRD-K08009212	0.0284546	0.00348233	0.00118342	0.0447588	0.00748455	-	-	2.7477
BRD-A83255679	0.028453	0.00256074	-0.00145221	0.0391775	0.0166199	-	-	0.869311
BRD-K37616496	0.0284466	0.0001182	0.00723161	0.0478131	0.00173042	-	-	3.01533
BRD-K18982118	0.0283776	0.0104159	0.00285147	0.0436701	-0.00018216	SRD5A2, SRD5A1	5 alpha reductase inhibitor	3.88363
BRD-K78656517	0.0283564	0.0105284	-0.00149046	0.0370662	0.0106086	-	-	2.90875
BRD-K60830482	0.0283559	0.0103035	-0.0016838	0.0444622	0.00362989	DHODH	Dihydroorotate dehydrogenase inhibitor, PDGFR inhibitor	4.68436
BRD-K58469385	0.0283527	0.00544017	0.00712351	0.0418479	0.00229384	-	-	3.14048
BRD-K12239796	0.0283415	0.00272434	0.00432673	0.0422264	0.00740552	-	-	2.5975
veliparib	0.02833	0.00248423	0.00152627	0.0483649	0.00428461	-	-
BRD-K57218099	0.0283291	0.00144848	0.00611876	0.0439653	0.00512573	-	-	3.53225
ketamine	0.0283008	0.0125454	0.00126216	0.0472033	-0.00440944	-	-	3.77311
BRD-K06486491	0.0282956	0.0109826	0.00488509	0.0464562	-0.00573257	-	-	2.22185
BRD-K03937692	0.0282764	-0.00053406	0.00618649	0.0448977	0.00600263	-	-	3.4221
MW-MITF9	0.0282609	-0.00124381	0.00154392	0.0474291	0.00879263	-	-	4.40099
BRD-K23021002	0.028202	0.00368261	-0.002332	0.0518449	0.00320848	-	-	3.54304
BRD-K63337793	0.0281932	-0.00194384	-0.00495455	0.0614313	0.00185351	-	-	3.04443
fluprostenol	0.0281914	-0.000357051	0.00247854	0.0492184	0.0050428	-	-
BRD-K18527484	0.0281911	0.00424351	0.00647854	0.0402418	0.00541832	-	-
BRD-K76023734	0.0281738	0.0035529	0.00707419	0.0404126	0.00530804	-	-	3.08729
BRD-K70891562	0.0281277	0.00595709	0.00143767	0.0559601	-0.00709947	-	-	1.02746
BRD-K54079231	0.0281265	0.00665557	0.00522386	0.0489081	-0.00453447	-	-	3.8673
BRD-K13798725	0.0281055	0.00708816	0.00363461	0.0462457	-0.00075744	RARB	Retinoid receptor agonist	4.36572
BRD-K22449045	0.0281008	0.00741614	0.0107213	0.0377005	0.00036373
BRD-A37645929	0.0280998	0.00751973	0.00545779	0.0344151	0.00880703	-	-	3.8731
IDRA-21	0.0280994	0.01757	0.00505739	0.0240481	0.00952326
BRD-K31215362	0.0280829	0.00634117	-0.00199267	0.0314568	0.0203606	-	-	4.65491
BRD-A17043706	0.0280788	0.00860706	0.00125947	0.0340802	0.0122108	-	-	4.07305
BRD-K31096204	0.028071	0.0118552	-0.00336928	0.0445627	0.00309343
BRD-A77697958	0.0280689	0.00346324	0.0103354	0.0318028	0.0105364	-	-	2.77005
BRD-K41957723	0.0280677	0.00854025	-0.000266193	0.0448815	0.00297978	-	-	3.98029
BRD-K26836050	0.0280662	0.00800576	0.0069821	0.0387511	0.00239341	-	-	3.76956
BRD-K98890753	0.0280484	0.0010024	0.00646408	0.0442407	0.00438967	-	-	3.30483
BRD-K58469266	0.0280298	0.00470487	0.00696358	0.0362889	0.00810234	-	-
BRD-K56274797	0.0280257	0.00105626	0.0115098	0.0345327	0.00895267	-	-	4.95139
BRD-K55835264	0.0280226	0.00380639	0.00170002	0.0452691	0.0052698	-	-	2.15982
BRD-K47071092	0.0280157	0.00447964	-0.0029863	0.0474313	0.00710689	-	-	4.48904
MW-SHH-250	0.0280114	0.00873131	-0.00156505	0.0466724	0.00218407	-	-	4.29078
BRD-K47143916	0.0280049	0.0129958	0.008182	0.0302465	0.00458554	-	-	4.73376
BRD-K65891102	0.0279854	0.00319758	0.0105739	0.0349406	0.00725862	-	-
BRD-K00591281	0.0279835	0.00918874	0.00308515	0.0250383	0.0186548	-	-	2.91263
BRD-K96295480	0.0279731	-0.00165478	0.00768738	0.0437354	0.00617822	-	-	2.6192
BRD-K72050226	0.0279696	0.0106274	0.00512016	0.0250361	0.0151555
PNU-74654	0.0279568	0.00414801	0.00329859	0.0297015	0.0187655	-	-	2.53969
BRD-K15440898	0.0279505	0.00542696	-0.00265699	0.0547908	-0.00165973	-	-
BRD-K72692763	0.0279433	0.00596837	0.0042751	0.0442648	0.00137843	-	-	3.62742
BRD-K25709301	0.0278753	0.00588141	0.00435248	0.0436023	0.00191438	-	-	3.6582
BRD-A12822115	0.0278588	0.00504891	0.00272212	0.0431698	0.00477685	-	-	3.55016
BRD-K13803936	0.0278529	0.0145093	0.00088033	0.0319582	0.00835797	-	-	4.1382
BRD-K89266502	0.0278472	0.000275606	-0.00133515	0.0504945	0.00625951	-	-	4.47018
BRD-K53971345	0.0278315	0.012168	0.00517815	0.0188256	0.0194912
BRD-K08941280	0.0278282	0.0120886	0.00161488	0.0254612	0.0164917	OPRD1	Opioid receptor antagonist	5.57748
BRD-K82824976	0.0278058	0.00549422	-0.00311199	0.0409365	0.0122928	-	-
BRD-K07895476	0.027801	0.00642971	0.00471325	0.0364113	0.00804768	-	-	4.40508
BRD-K28811650	0.0277814	0.0084712	0.00691202	0.0275389	0.0126406	-	-	3.5211
BRD-K61821542	0.0277746	0.012024	0.00921144	0.0305776	0.00373611	-	-	3.51464
BRD-K78792702	0.0277676	0.0173204	0.00270196	0.0343049	0.00120787	-	-	5.24582
VU-0415108-1	0.0277493	-0.00582497	-0.00152731	0.056555	0.00629586
BRD-K02946901	0.0277367	0.0039459	0.0012116	0.0294893	0.0208266	-	-	2.2582
BRD-K05414181	0.0277295	0.00625704	0.00024243	0.0457474	0.0032122	-	-	8.24533
BRD-K52595962	0.0277279	0.00725192	0.0038371	0.0453053	-0.00093852	-	-
BRD-K98834499	0.0277273	0.0046745	0.0037241	0.0460125	0.00104355	-	-
BRD-K09253654	0.0276788	-0.000647361	0.00549026	0.0402855	0.0102293	-	-	2.87486
BRD-K19608763	0.0276688	0.00774445	0.00341047	0.0327011	0.0114815	-	-	3.56395
BRD-K52731958	0.0276591	0.00326855	-0.00146302	0.0432726	0.0102402	-	-	9.04938
dicyclohexylurea	0.027641	0.00416759	-0.00176767	0.0525834	0.000298768	-	-
BRD-K03191078	0.0276407	0.00977949	0.00163321	0.0340285	0.00984024	-	-	3.75335
BRD-K64302818	0.0276357	0.011358	-0.00187438	0.0371541	0.00863362	-	-	3.99609
BRD-K87920770	0.0276148	0.00719419	0.00113478	0.0415025	0.00539802	-	-	5.05588
BRD-K92367471	0.0276144	0.0071704	-0.00021138	0.0409187	0.00735114	-	-	2.5428
BRD-K47826846	0.0275862	0.00599814	0.00597919	0.0398646	0.00333061	-	-	1.86041
BRD-K57059449	0.0275816	0.00703675	0.00583712	0.0255598	0.0167294	-	-	2.40102
BRD-K63375110	0.0275784	-0.00410627	-0.000437254	0.0519767	0.0077235	-	-	2.20291
BRD-K82195532	0.0275686	0.0115874	-0.00172905	0.0479049	-0.00262598	-	-	6.26505
BRD-K29898553	0.0275476	0.00073019	0.0100654	0.0365061	0.00779351	-	-	4.34816
BRD-K66494817	0.0275293	0.00605637	0.00823864	0.048556	-0.00779246	-	-	3.40001
BRD-K96761342	0.0275101	0.00174346	-0.00263693	0.0605578	-0.0046441	-	-	3.43476
BRD-K30640165	0.0274992	-0.00430175	0.00588853	0.0457141	0.0076976	-	-	4.15419
BRD-M36167927	0.0274991	0.00861341	0.00563458	0.0236038	0.0171465	CHEK1, CHEK2	CHK inhibitor	4.34745
ST-014366	0.0274519	0.00800656	0.00340206	0.0382485	0.00524669	-	-
BRD-K07551625	0.0273932	0.0158621	0.00377627	0.0300463	0.00510177	-	-
BRD-K56764633	0.0273749	0.00430368	0.00125939	0.0420185	0.00716823	-	-
BRD-K72999223	0.027371	0.0134924	0.00383072	0.0398885	-0.0024696	MGMT	DNA alkylating agent	2.91358
BRD-K79410674	0.0273662	0.00725068	0.00178575	0.0351697	0.0105263	-	-	4.22816
BRD-A33442372	0.0273571	0.0144058	-0.00322631	0.0351447	0.00839004	-	-	3.37282
BRD-K08388529	0.0273473	0.00785736	0.00296453	0.0296408	0.0142318
BRD-K00868395	0.0273446	0.00259526	-0.00454386	0.0498278	0.0068099	-	-	2.55924
BRD-K38498572	0.0272811	0.00512842	-0.00282109	0.0466927	0.00556217	-	-
BRD-K50078508	0.0272781	0.00764136	-0.00107054	0.0423911	0.0055942	-	-	3.06573
BRD-K26559753	0.027278	0.00713439	0.00536474	0.0373308	0.00472611	AHR	Aryl hydrocarbon receptor agonist	1.19393
BRD-K94469522	0.027268	0.00907051	-0.0026095	0.0431461	0.00492887	-	-	2.99536
INCB-3284	0.0272674	0.014935	7.02982e-05	0.0353776	0.00415191	-	-
BRD-K31067719	0.0272553	0.00671191	0.00786077	0.0315458	0.00839216	-	-	2.87129
BRD-K80171496	0.0272521	0.00768229	0.00132718	0.0400358	0.00545897	-	-	4.07186
BRD-K03254663	0.0272471	0.0114144	-0.00093824	0.0273398	0.0166783	-	-	1.71899
EMF-sumo1-5	0.0272257	0.00452535	0.00279516	0.0430969	0.00403403	-	-	6.2974
BRD-K76321890	0.0272146	0.00290886	0.00696836	0.0398379	0.00471396
BRD-K23905877	0.0271906	0.00250677	0.00140176	0.0424038	0.00806891	-	-	3.12784
ST-4029487	0.0271889	0.00617893	-0.00576807	0.052352	0.00161486	-	-
BRD-K45043387	0.0271714	0.0023974	0.00359571	0.0462191	0.00213053	-	-	1.91695
BRD-K18290923	0.0271673	0.00270164	0.00694421	0.0347656	0.00992319	-	-	2.51642
BRD-K97624853	0.0271658	0.00679866	-0.00439357	0.0449779	0.00694853	CSNK2A2, CSNK2A1	Casein kinase inhibitor	3.06788
BRD-K43000271	0.0271641	0.00339317	0.00477663	0.0419848	0.00417355	-	-	3.37553
BRD-K31059159	0.0271557	0.00325509	0.00900357	0.0343115	0.00774123	CHEK1	CHK inhibitor	2.36476
SA-1459224	0.0271455	0.00609403	-0.00474445	0.051851	0.00109052	-	-	2.48383
BRD-K31749518	0.0271437	0.00880993	-0.000396251	0.0437539	0.00211974	-	-	3.12902
BRD-K21610715	0.0270962	0.0130982	0.0027554	0.0347539	0.00358483	-	-	3.74044
ICI-63197	0.0270746	0.0106531	-0.00215284	0.0338988	0.01175	-	-	3.02043
rotundine	0.0270649	0.000356496	-0.000317053	0.047739	0.00635135	-	-
dienestrol	0.0270605	0.00850263	-0.00319577	0.0472239	0.00159031	-	-	3.80721
BRD-K09523238	0.0270521	-0.00245502	0.00597345	0.0411513	0.00943445	-	-	2.04688
BRD-K90762344	0.027047	0.0122441	-0.00049704	0.0339591	0.00838782	-	-	1.70275
BRD-K36018407	0.027044	0.00779598	-0.000156622	0.0555384	-0.00908974	-	-	4.26882
denbufylline	0.0270319	0.00655282	0.000540486	0.0454922	0.00147837	-	-	2.15278
alda-1	0.0270298	0.00956097	-0.00445317	0.0465078	0.00244393	-	-	5.36525
BRD-K49093373	0.0270162	0.00717617	-0.00175705	0.0468168	0.00179652	-	-	2.73452
BRD-K05125666	0.0270158	0.00234657	0.00643964	0.045852	-0.00060667
BRD-K37515001	0.0270103	0.00577527	-0.00185308	0.0471461	0.0029523	-	-	2.21899
BRD-K94196749	0.0270045	0.00291038	0.00994289	0.0315538	0.00960186	-	-	3.63567
BRD-K55884477	0.0269932	0.00730106	0.00284254	0.0465132	-0.00267041
BRD-K42232544	0.0269821	0.00787639	0.00432612	0.0356536	0.00610808	-	-	3.75405
BRD-K65441343	0.0269803	0.00652159	-0.00015572	0.0383502	0.00924453	-	-	3.13286
BRD-K67442425	0.0269757	0.00357311	0.00036417	0.0322628	0.0177514	-	-	3.01465
BRD-A43164341	0.0269751	0.00111671	-0.00168345	0.0404673	0.0140496	-	-	5.49861
BRD-K21453542	0.0269488	0.00258182	-0.00505861	0.059008	-0.00263375	-	-
SA-1457472	0.0269211	0.00326687	-0.00174918	0.044262	0.00806248	-	-
BRD-K63892351	0.0269174	0.00984031	-0.00189228	0.03745	0.00843679	-	-	3.18494
BRD-K63303938	0.0269003	0.0122005	0.00282938	0.0231719	0.0155988	-	-	3.18302
BRD-K98969488	0.0268923	0.0065292	0.00184278	0.0416228	0.00378979	-	-	1.36254
BRD-K94881465	0.0268775	0.0121664	0.00249478	0.0286649	0.0104291	-	-	4.2142
BRD-K56223790	0.0268422	0.00686161	0.00229222	0.019014	0.0255166	-	-
BRD-K42475945	0.0268226	0.0118308	-0.00144114	0.0330795	0.010176	-	-	7.0211
BRD-K52460145	0.0268028	0.000661796	0.00463482	0.0490903	-0.00078122	-	-	9.3698
nystatin	0.026802	0.00776001	0.00121334	0.0467647	-0.00213417	-	-	1.90363
BRD-K47841020	0.0267883	0.0113673	-0.00014972	0.0318164	0.0105425	-	-	2.49702
BRD-K11275619	0.0267869	0.00322063	0.00142887	0.0386176	0.0103067	-	-	3.8771
glipizide	0.0267858	0.0013008	0.000746327	0.0400812	0.0114433	HTR1D, HTR1A	Serotonin receptor antagonist	6.09142
BRD-K19965080	0.0267844	0.00448422	0.00032606	0.0393276	0.00943092	-	-	2.90875
BRD-K84432438	0.0267756	-0.000906612	0.0066224	0.0439902	0.00384525	-	-
BRD-K75666689	0.0267741	0.00444868	0.00119276	0.0414066	0.00650026	-	-	4.85436
BRD-A68202111	0.026764	0.0113894	0.00794295	0.0383284	-0.00413284	-	-	2.97911
FK-866	0.0267622	0.00597347	0.000132152	0.0396136	0.00780528	-	-	4.1952
BRD-K62965224	0.0267601	0.0115606	0.00211003	0.0408137	-0.00096407	-	-
BRD-K03534861	0.0267497	0.00655741	-0.00548819	0.0432731	0.00915711	-	-	3.24525
BRD-K41563239	0.0267192	0.00724831	0.0056887	0.0199682	0.0205331	-	-	1.74524
BRD-K06927120	0.0267145	-0.00416849	0.000311252	0.0471731	0.0101132	-	-	3.26125
BRD-K50498614	0.0266998	0.00620819	0.00797506	0.0384652	0.00075116	P2RY12	Purinergic receptor antagonist	5.24314
BRD-K95963125	0.0266994	0.00438886	0.00288667	0.0276701	0.0184532	-	-	3.83562
BRD-K52833964	0.0266799	0.0121431	0.00087543	0.0269516	0.0133897	-	-	3.5393
BRD-K07689069	0.0266686	0.00687736	0.0016495	0.0359051	0.00890528	-	-
BRD-K49460772	0.0266563	0.00322554	0.00185149	0.0341203	0.0141153	-	-
BRD-K18589989	0.0266455	0.00429603	-0.00543976	0.0562311	-0.00179644	-	-	4.32611
BRD-K07025286	0.0266389	0.00722274	0.00889784	0.034392	0.00276535	-	-	2.37879
BRD-K32759520	0.0266269	0.0109252	-0.00322929	0.042339	0.00321888	-	-	3.4055
THZ-2-98-01	0.0266251	0.00561324	0.00328697	0.0371954	0.00715461	-	-	3.36482
BRD-K99660708	0.0266116	0.00559982	-7.16411e-05	0.0520031	-0.00430816	-	-	1.97155
BRD-K08706435	0.0265863	0.00862059	0.00517363	0.0473663	-0.00798786	-	-	2.01007
BRD-K21866464	0.0265839	0.00385862	0.0043326	0.0288799	0.0160967	-	-
BRD-K02537686	0.0265682	0.00737794	0.000207202	0.0461197	-0.000568468	ABCC8	ATP channel blocker	4.38628
BRD-K20470077	0.0265557	0.00286188	0.00096362	0.0395817	0.00970416	-	-
KIN001-266	0.0265361	0.00906252	-0.00307778	0.0328848	0.0142027	-	-	3.53821
BRD-K85776843	0.0265347	0.0100746	0.00344835	0.0316241	0.00792233	-	-	4.38034
BRD-K92655621	0.0265344	0.00820482	0.00243485	0.0359198	0.00650937	-	-	3.26074
BRD-K16136457	0.0265218	0.0047106	0.00338392	0.0347952	0.0101539
BRD-K70512038	0.0264991	0.0118085	0.00100333	0.036813	0.00337331	-	-
BRD-A41228941	0.0264921	0.0121387	0.0035998	0.0349223	0.00232344	DRD1, DRD2, DRD3	Dopamine receptor antagonist	6.92825
BRD-K08835142	0.0264872	-0.0020566	0.00567174	0.0486816	0.00067755	-	-
BRD-K95080859	0.026484	0.00192876	-0.000468386	0.0514056	0.000101976	-	-	3.01137
BRD-K49675259	0.0264429	0.00548554	0.00628465	0.0363695	0.00474616	-	-	3.19294
BRD-K56520530	0.0264427	0.00568505	0.00610341	0.0381253	0.00297161	-	-	4.08711
BRD-K00938872	0.0264341	0.00742824	0.00717499	0.0294141	0.00885098
BRD-K72875756	0.0264227	0.0103193	0.00275737	0.0340501	0.00571857	-	-	2.0942
BRD-K17750548	0.0264178	0.00176701	-0.00219149	0.0530725	0.000187516	-	-	3.45204
BRD-K90965240	0.0264048	0.00412721	0.00033847	0.0414448	0.00689905	-	-	6.61236
vinyl-acetate	0.0264045	0.00967102	0.00348887	0.0434527	-0.0038035	MAP2K2, MAP2K1	MEK inhibitor	3.31969
BRD-K49955466	0.0263831	-0.00149796	-0.000152855	0.0412112	0.0132059	-	-	3.22222
dimaprit	0.0263692	0.00547612	0.00715972	0.0415733	-0.0014708	-	-	5.02251
BRD-K33863933	0.0263659	0.0120617	0.00045707	0.0250001	0.0152128	-	-
BRD-K73531877	0.0263591	0.0116943	0.00171878	0.0321566	0.0071484	-	-	4.488
BRD-K45058172	0.0263589	0.00476662	0.00318621	0.0331311	0.0116339	-	-	4.21087
BRD-K67531128	0.0263515	0.011295	0.00144708	0.0310173	0.0089437	-	-
BRD-K81799166	0.0263505	0.0102582	0.00145379	0.035275	0.00571392	-	-	3.10981
BRD-K49907578	0.0263259	0.00378746	0.0124976	0.0328404	0.00352636	-	-	2.78732
BRD-K43628610	0.0263217	0.00980407	0.00080675	0.0387466	0.0032859	-	-	2.42714
BRD-K69310574	0.0263171	0.00328639	0.00712093	0.0342397	0.00798709	-	-	4.59986
dosulepin	0.0262977	0.00034664	0.00312671	0.0364879	0.0126342	-	-	2.26876
BRD-K67863009	0.0262905	0.00378965	0.00195904	0.0452158	0.00161658	-	-	3.14771
BRD-A08820802	0.0262878	0.00441196	0.00144293	0.0349691	0.0117515	NR3C1	Glucocorticoid receptor agonist	1.39433
BRD-K97540907	0.0262754	0.00943583	0.00181983	0.0352592	0.0060359	-	-	2.90728
BRD-K57026098	0.0262656	0.00433224	0.00122386	0.0341292	0.0128459	-	-	4.94258
BRD-K10136726	0.0262653	-0.000611736	0.00589105	0.0332946	0.0139567	-	-	2.50901
BRD-K04928505	0.0262484	0.0117909	0.00497134	0.0318966	0.00383788	-	-	2.4723
BRD-K31081052	0.0262398	0.0101986	0.00062278	0.0368716	0.00478671	-	-	3.27926
BRD-K13428252	0.0262274	-0.00037301	-0.0072576	0.0483257	0.0117597	-	-	3.01465
BRD-K27137352	0.0262169	0.00626477	0.00591691	0.0284961	0.011756	-	-
BRD-K70695911	0.0262064	0.00500435	0.00446789	0.0352677	0.00767293	-	-	2.73452
BRD-K36149190	0.0262057	-0.00452021	0.00244409	0.0525666	0.00192089	-	-	2.98558
BRD-K07600484	0.0261581	0.00512583	0.00679295	0.0254346	0.0149627	ACHE	Acetylcholinesterase inhibitor	5.4724
BRD-K18594025	0.0261531	0.00503408	0.00703226	0.0335208	0.00671908
BRD-K84788922	0.0261502	0.0117778	0.00492699	0.028086	0.00750963	-	-	2.81341
BRD-K80412673	0.0261439	0.0030013	-0.00622511	0.0414641	0.0140475	-	-	3.85283
BRD-K68424387	0.0261311	0.00671014	0.00335772	0.0334957	0.00869859	-	-	3.3917
BRD-K39158620	0.0261218	0.00916366	0.0062517	0.0266679	0.0101603	-	-	6.74131
BRD-K44582497	0.0261162	0.00583401	0.00166188	0.0259971	0.0187394	APEX1	APEX inhibitor	4.505
BRD-K95489112	0.0261003	0.00814841	0.00397782	0.0329997	0.00707472	-	-	2.65264
BRD-K66733186	0.0260967	0.0046412	-0.00110048	0.0433353	0.00531735	-	-
BRD-K26479796	0.0260859	-0.00122187	0.0062229	0.0464473	0.00072333	-	-	2.63832
BRD-K21509725	0.0260845	-0.000555006	0.000857473	0.0525587	-0.000692265	-	-	3.37069
BRD-K54543575	0.026078	0.0107129	0.0102954	0.0225214	0.00862633	-	-
BRD-K78915806	0.0260547	-0.00376565	-0.00857304	0.0487887	0.0156594	-	-	2.23466
BRD-K56126872	0.0260367	0.00536472	0.00413562	0.0329574	0.00961573	-	-	4.77022
BRD-K04669648	0.0260344	0.0126539	-0.00261033	0.040039	0.00198627	-	-	2.77005
BRD-A70731303	0.0260344	0.00642119	0.00013896	0.0427309	0.00277777	-	-	2.24126
BRD-K13941052	0.026015	0.00502301	0.00334838	0.0336963	0.00996231	-	-	3.2554
BRD-K03935681	0.026002	-0.00136637	0.00584118	0.0414383	0.00609089	-	-	2.55924
BRD-K31427141	0.0259872	0.00631291	0.00381466	0.032441	0.0094058	-	-	3.38564
BRD-K94397824	0.0259848	0.00880103	-0.00805836	0.0478204	0.00340657	-	-	3.78955
iproniazid	0.0259832	0.00485086	0.000751576	0.0361068	0.0102571	-	-
BRD-K20847739	0.0259791	0.00183053	0.0037931	0.034857	0.0114775	-	-	3.18898
BRD-K08970510	0.0259567	0.0145209	-0.00113856	0.0327808	0.00575024	-	-
BRD-K52423731	0.025904	0.0101808	-0.00199835	0.0311089	0.0125168	-	-
BRD-K39674306	0.0259037	-0.00576229	0.00202653	0.0368642	0.018679	-	-	4.28101
BRD-K84949119	0.0258957	0.00603364	0.00086152	0.033629	0.0112672	-	-
BRD-K91593159	0.0258872	0.00552568	-0.00048448	0.0423315	0.00440163
BRD-K19340473	0.0258852	0.00251336	0.00560125	0.0388582	0.00479765	-	-	1.71321
BRD-K83322422	0.0258625	-0.00464142	0.00394755	0.0606642	-0.00824538	-	-	3.72765
BRD-K35809598	0.0258606	0.00297863	-0.00301201	0.0513875	0.000367062	PPARA	PPAR receptor agonist	4.85612
BRD-K77800502	0.0258516	-0.00104294	0.00210063	0.0471632	0.00348236	-	-	3.08726
BRD-K88488723	0.0257881	0.0114412	0.00151103	0.027822	0.0108018	-	-
BRD-K12034365	0.0257597	0.00985624	-0.00407366	0.0317505	0.0139863	-	-	4.54696
FGFR3_FBS	0.0257444	0.00617268	-0.00109758	0.0311364	0.0152773	-	-	2.25361
BRD-K22812176	0.0257438	-0.00105021	0.00658115	0.0351104	0.0108462	NR3C1	Glucocorticoid receptor agonist	2.39687
anthraquinone	0.0257185	0.0111426	0.00504267	0.0267762	0.00847561	-	-	3.04917
BRD-K50641952	0.0257117	0.00485908	0.00547313	0.0272288	0.0138624	-	-	1.87957
BRD-K28810861	0.0257047	0.00665735	-0.00176199	0.0308299	0.0156841	-	-
BRD-K99155518	0.0256818	0.00141992	0.00191692	0.0469491	0.00107755	-	-	4.20876
BRD-K48389518	0.0256717	0.00610413	0.00274819	0.0397422	0.00274888	-	-	2.03237
fraxetin	0.0256713	0.0114922	0.00486108	0.0237769	0.0112125	-	-	3.98919
BRD-K14696368	0.0256677	7.61992e-05	-0.00107283	0.045621	0.006711	-	-	7.22009
BRD-K86715767	0.0256653	0.00662663	0.0037743	0.0477953	-0.00686558	-	-
TWS-119	0.0256611	0.000429857	-0.000906065	0.042237	0.00956145	-	-	4.21027
BRD-K32893898	0.0256551	0.00725938	0.00336084	0.0385328	0.00215731	-	-
BRD-K30198800	0.0256542	0.00737746	0.00875548	0.0273014	0.0078741	-	-	4.06059
BRD-K61909412	0.0256491	-0.00431548	-0.00073118	0.0426149	0.01373	-	-	5.39649
BRD-K86956630	0.0256461	0.000237091	0.00469208	0.0363053	0.0100578
BRD-K95875837	0.025645	0.00889882	-0.00106484	0.0414152	0.00204082	-	-	3.91878
AS-604850	0.0256435	0.0056169	-0.0021316	0.0322337	0.0155681	-	-	4.63585
BRD-K77719922	0.0256341	0.00413862	-0.00264948	0.0418129	0.00796625	-	-	3.5393
BRD-K44086628	0.0256193	0.00280769	0.00299808	0.0327794	0.0126534	-	-	2.3531
alclometasone	0.0256067	0.00922944	0.00581189	0.0193568	0.0168153
BRD-K50036850	0.0256034	0.00607193	0.00634256	0.0308044	0.00798794	-	-	6.18697
BRD-K18149487	0.0255985	0.00696169	0.00400618	0.0385864	0.00164268	-	-	0.904966
BRD-K66030669	0.025597	0.010832	0.00210521	0.0299342	0.00832254	-	-	5.22938
BRD-K17886576	0.0255962	0.00440507	0.00573002	0.0420367	-0.00097947
BRD-K56775726	0.0255877	0.0100619	0.00540166	0.0257939	0.00991794	-	-
BRD-K62781263	0.0255626	0.00778144	0.00736112	0.021073	0.0149097	-	-	5.14044
BRD-K15028327	0.0255539	0.00426511	0.00554436	0.034193	0.00710543	ITGA2B, ITGB3	Platelet aggregation inhibitor	1
BRD-K28293491	0.0255531	0.00657436	-0.00321158	0.0501092	-0.00236578	-	-	3.80551
BRD-K23432132	0.0255524	0.00514354	0.0063468	0.0409101	-0.0012956	-	-
tetroquinone	0.0255516	0.000494304	-0.00635655	0.0571257	-0.000160257	-	-
nitrocaramiphen	0.0255514	0.00300269	-0.000840169	0.0516931	-0.0027529	-	-	4.89663
SA-1922261	0.025543	0.00774236	-0.00236731	0.0435262	0.00218484	-	-	3.25483
BRD-K48564062	0.0255415	0.00772443	-0.00525036	0.0460318	0.00257718	-	-
icosapent	0.0255411	0.00235672	0.00217243	0.0346959	0.0118572	-	-	3.03845
totaralolal	0.0255405	0.00022551	-5.49569e-05	0.0434078	0.00750264	-	-	3.80098
CS-2092524	0.0255339	0.00876422	0.00251771	0.0342733	0.00551264	-	-
BRD-K10148216	0.0255319	0.00204163	0.00476861	0.0409263	0.00332726	-	-
enzastaurin	0.0255252	-0.000811369	-0.00147801	0.0460471	0.00729268	-	-
JPR-3-97-17	0.0255221	0.0130198	-0.0011732	0.0492515	-0.0100539	-	-	2.68135
BRD-A20242387	0.0255112	0.00375677	0.00484896	0.0361547	0.00626184	-	-	7.72144
nitrarine	0.0254893	0.0127714	-0.000171768	0.0440995	-0.00572047	-	-
BRD-K99749622	0.0254805	0.00787081	0.00693791	0.0243205	0.0118318
BRD-K57487331	0.0254785	-0.00242305	-0.00100155	0.0398198	0.0145618	-	-	2.5975
BRD-K56890200	0.0254781	0.00415915	-0.00261897	0.0315701	0.0178458	-	-
BRD-A77328129	0.0254754	0.00300449	-0.00391146	0.0404068	0.0114509	-	-	3.89866
BRD-K34580085	0.0254712	-0.00163509	-5.3476e-05	0.0517651	0.000865723	-	-	3.62738
BRD-K88080911	0.0254606	-0.00134342	0.00606903	0.0409668	0.00522882	-	-	3.58571
BRD-K66687431	0.025453	0.00691261	-0.000745349	0.0443541	0.000384524	-	-	3.39435
BRD-K12395425	0.0254435	0.0113463	0.0102459	0.0316009	-0.00230612	-	-	3.12724
BRD-K67458784	0.0254188	0.0127589	-0.00412321	0.036689	0.00551292	-	-	3.74443
BRD-K24422491	0.0254143	-0.00176818	0.00777455	0.0422954	0.00252683	-	-	4.40099
phenacemide	0.025387	0.0131678	0.00838101	0.0158953	0.0133299
BRD-K46185480	0.0253755	0.00154999	0.00694119	0.0349617	0.00729808	-	-
BRD-K58404149	0.0253741	0.0106254	-0.00220025	0.0392435	0.00307954	-	-	4.6588
BRD-A82976259	0.0253725	0.00439441	0.00115657	0.0350743	0.0101198	-	-	4.11667
BRD-K92791036	0.0253633	0.00134228	0.00103976	0.033137	0.0152075	-	-
eliprodil	0.0253567	0.00822226	-0.00161971	0.0400243	0.00408646	CLCNKA, PTGS2	Cyclooxygenase inhibitor	4.09586
betulinic-acid	0.0253491	0.00460462	-5.01038e-05	0.0403405	0.00580307	-	-	4.38222
BRD-K66577743	0.0253363	0.00419273	-0.00093235	0.0250643	0.0223479	PIM1, FLT3, PIM2, PIM3	Pim kinase inhibitor	4.62875
BRD-K99723587	0.0253352	0.00385767	0.0103327	0.0275778	0.00890219	-	-	5.11191
PF-750	0.0253255	-0.00656361	-0.000698637	0.0486491	0.0092642	-	-	2.31763
BRD-K72717797	0.0253186	0.00710858	0.00416711	0.0305388	0.00882266	-	-	2.91318
BRD-K84389640	0.0253171	0.00896725	0.00198427	0.0394195	0.000263182	-	-	0
BRD-K33956641	0.0253157	0.00763518	0.00740012	0.0327463	0.00284981	-	-	2.03487
BRD-K46044238	0.0253149	0.00904143	0.00351419	0.0334537	0.0046204	-	-	6.05986
BRD-K49630774	0.0253078	0.00653327	0.00255684	0.0414179	0.00010752	-	-	1.73873
BRD-K93419974	0.0253021	-0.0133683	0.0060825	0.0486045	0.00928539	-	-	2.54502
BRD-K52094743	0.0252918	-0.00021714	0.00802946	0.0352585	0.00751269	-	-	3.43301
BRD-K14538540	0.0252914	0.00253756	0.00403411	0.044327	-0.000315756	-	-	3.75937
BRD-K09641113	0.0252897	0.00026756	-0.00104135	0.0530621	-0.0017089	-	-	4.58393
BRD-K36054906	0.0252886	0.0077839	0.00383271	0.0398396	-0.000878947	-	-	3.60956
BRD-K58644442	0.0252861	0.00310601	0.00469754	0.0346358	0.00813279	-	-	1.51876
BRD-K04980212	0.0252778	0.00531724	0.00173744	0.0256939	0.0178071	-	-
BRD-K38092925	0.02527	0.00204896	0.00328006	0.0352843	0.00992668	-	-	2.35647
BRD-K34462187	0.0252421	-0.000496022	0.00250956	0.0416149	0.0068558	-	-	3.00793
BRD-K96491043	0.0252383	0.00868196	0.00077571	0.019863	0.021156	-	-	2.86317
BRD-K57420195	0.0252086	-0.00817834	-0.00406487	0.0580142	0.00464619	-	-	3.57105
BRD-K50815029	0.0251812	0.00381379	-0.0028937	0.0397092	0.00973305	-	-	3.88533
BRD-K68108628	0.0251631	0.00970994	0.00223904	0.033774	0.00460324	-	-	3.63605
BRD-K11782435	0.0251624	0.0113675	0.0030682	0.0255496	0.0103396	-	-	2.5975
BRD-K03235359	0.0251593	0.00854827	5.40793e-05	0.0429656	-0.00124947	-	-
BRD-K34741587	0.0251574	0.00920745	0.0053865	0.0257225	0.00999835	-	-	1.02427
BRD-K01241136	0.0251508	0.00153161	0.000694458	0.0340421	0.0140335	-	-	2.36745
BRD-K15672523	0.0251486	-0.00043504	0.0106546	0.0278671	0.0122104	-	-	3.13313
BRD-K12929741	0.0251446	0.00482058	0.00297336	0.0307591	0.011736	-	-	3.45183
BRD-K97263385	0.0251409	0.0063487	-0.00064973	0.0426118	0.00197106
BRD-K19231873	0.0251395	0.0177823	-0.00178033	0.0294384	0.00483857
BRD-K56120807	0.0251377	0.00925921	0.00157313	0.02934	0.0101032	-	-
BRD-K77326001	0.0251365	0.00383307	0.000743935	0.0461848	-0.00048876	-	-	2.68829
BRD-K56939159	0.0251358	0.0102516	0.00682638	0.0300172	0.00317643	-	-
BRD-K87261428	0.0251263	0.011119	0.00514529	0.0298526	0.00413568	-	-	2.38342
BRD-K97938633	0.0251246	0.010137	0.00080637	0.0227147	0.0165912	-	-	2.67273
BRD-K66803141	0.0251231	0.00400826	0.00166005	0.0406819	0.00389592
BRD-K15285842	0.0251102	0.00596962	0.00759472	0.032731	0.00392508	-	-	4.95952
BRD-K86897283	0.02511	0.00544503	0.00849178	0.0236101	0.012673	-	-	4.69692
BRD-K94035551	0.0251057	0.00956791	-0.00208884	0.0452325	-0.00250024	-	-
BRD-K51381937	0.0251013	0.00114992	-0.00860386	0.0460188	0.0116377	-	-	4.16085
BRD-K40494117	0.0250977	0.00207598	0.00294559	0.0322052	0.0129687	ATP2A1	ATPase inhibitor	4.43534
robustic-acid	0.0250863	0.00160209	0.00523044	0.0341737	0.00916648
BRD-K59609877	0.0250582	0.0117337	0.000589685	0.039827	-0.00203386	-	-
BRD-K20171002	0.0250554	0.00830301	0.00163741	0.0348227	0.00534768	-	-	4.55632
BRD-K77032979	0.0250432	0.00470607	0.0049591	0.0337073	0.00671403	-	-	3.39435
BRD-A88237615	0.0250394	0.0101284	-0.00203843	0.0393621	0.00262673	TOP1	DNA binding agent	4.24498
BRD-K02839126	0.0250371	0.00355896	0.00194002	0.0314543	0.0131209	HTR2B, HTR2A, HTR2C	Serotonin receptor antagonist	4.15881
BRD-K40328231	0.025034	0.00876819	-0.00083484	0.0367069	0.00542778
BRD-K90040724	0.0250262	0.0106863	0.00140563	0.0343593	0.00360113	-	-
fluocinolone	0.0250218	0.0100392	-0.00234045	0.0349933	0.00735147	-	-	2.82702
BRD-K59995645	0.0250017	0.0108412	0.00595155	0.0268984	0.00631227	-	-	4.03575
BRD-K41354272	0.0249899	0.00296029	0.00203567	0.0448311	0.000152676	-	-	3.50255
BRD-K30121969	0.024989	0.00641959	0.00646659	0.0301998	0.00689198	-	-	4.53404
BRD-K07208716	0.0249741	0.00499653	0.00292772	0.0337614	0.00826252	-	-
BRD-K03188480	0.0249677	0.0119373	0.000965567	0.0337608	0.00327178	-	-	3.06086
BRD-K14654869	0.0249638	0.00307659	0.00255858	0.0370555	0.00723688	-	-
BRD-K09168812	0.0249577	0.00949145	0.00149208	0.0353087	0.00362318	-	-	2.11189
BRD-K11480730	0.0249453	0.00729817	-0.00226685	0.0422608	0.00259839	-	-	2.25094
BRD-K20754058	0.0249308	0.00456947	0.00375648	0.0428111	-0.0012754	-	-	2.64665
BRD-K00918977	0.0249267	0.00133603	0.00279159	0.0334358	0.01229	-	-	8.22962
BRD-K50919475	0.0249256	0.0111247	0.00558426	0.0301175	0.00302476	-	-	3.15077
BRD-A18945128	0.0249225	0.00726719	0.0022877	0.028112	0.012178	-	-	4.8225
BRD-K66216147	0.0249218	0.00966083	0.0033038	0.030207	0.00667208	-	-
BRD-K34232791	0.0249152	0.0073397	-0.0002499	0.0359123	0.00682831	-	-	3.00359
BRD-K91784140	0.024906	0.0086362	0.00113129	0.03133	0.00871444	-	-	3.10665
BRD-K13007223	0.0249041	-0.00048283	0.00592054	0.0441791	0.00019144	-	-
SA-418267	0.0249001	0.0103475	0.00272865	0.0377909	-0.00106684	-	-	2.80201
BRD-K24333636	0.0248944	0.0106279	0.0015519	0.0189443	0.0186646	-	-	3.02245
BRD-K10705624	0.0248929	2.934e-05	-0.00233449	0.0468374	0.00525348	-	-	3.72979
bms	0.0248831	-0.00273336	0.00243646	0.0428562	0.00720698	TLR7, TLR8	Toll-like receptor agonist	3.52017
BRD-K59841546	0.0248825	0.00471143	0.00183711	0.0366357	0.00658082	-	-	3.54753
BRD-K55277887	0.0248763	0.0199006	0.00207048	0.0211394	0.00664207	-	-	4.24681
BRD-K88762178	0.0248484	0.00691618	-0.00150533	0.0358547	0.00843133	-	-	6.25871
ostarine	0.0248383	0.00106304	0.00361671	0.0467106	-0.0017138	-	-
BRD-K03911650	0.0248346	0.00540976	0.00782669	0.0276539	0.00877889	-	-
BRD-K09290524	0.0248223	0.00555842	-0.00313843	0.0397	0.00752472	-	-	3.93016
etomoxir	0.024819	0.00431152	0.00310962	0.0347537	0.00746328	-	-	2.75115
levonorgestrel	0.0248108	0.0107739	0.000703389	0.0243745	0.0137698	-	-	3.45895
BRD-K09721398	0.024803	0.00332125	0.00496573	0.0360495	0.00526949	-	-	6.97181
BRD-K91662540	0.0247997	0.00945621	0.00453832	0.0431977	-0.00759294	-	-	1.70275
BRD-K20016759	0.0247767	-0.00195326	0.006789	0.0411827	0.00353502	-	-	2.16307
BRD-A36774080	0.0247726	0.00836824	0.00270782	0.0413942	-0.00292511	-	-	4.15316
614_7033_4267	0.0247627	0.00278654	-0.00151373	0.0337387	0.0145138	-	-	4.03613
BRD-K74860368	0.0247487	0.00887133	0.00196546	0.0320116	0.006649	-	-	3.56885
SA-1922932	0.0247487	0.0116542	-0.00426665	0.0452725	-0.00316268	-	-
BRD-K06912584	0.0247349	0.00122914	-0.00250957	0.0491866	0.00156362	-	-	2.63825
BRD-K79732056	0.0247329	0.0108468	-0.00102414	0.030473	0.00917003	CYP2C19, CYP2D6	Voltage-gated sodium channel blocker	7.99635
BRD-K71253424	0.0247326	0.00229253	-0.00097706	0.0458308	0.00231889	-	-	2.76189
BRD-K20737562	0.0247264	0.0109105	-0.00141306	0.0297871	0.0101684	-	-	3.95751
BRD-K69393995	0.0247233	0.0119788	0.00504674	0.0203818	0.0120393	-	-	4.04437
BRD-K66551929	0.024714	0.00872296	-0.00870389	0.0410385	0.00837041	-	-	4.99122
BRD-K05135707	0.0247083	-0.00013446	0.00570079	0.0426805	0.00116986	-	-	3.24061
4-P-PDOT	0.024699	0.0125639	0.00485065	0.0246445	0.00733909	CALM1	Calmodulin antagonist	2.71901
BRD-K35101110	0.0246924	0.0127024	-0.00570505	0.0407448	0.00164262	-	-	3.44082
BRD-K00346458	0.0246893	0.00167812	-0.00847704	0.0424262	0.0137514	-	-	3.74532
BRD-K81954791	0.0246873	0.00081872	0.00252614	0.0340212	0.0120085	-	-	2.56912
BRD-K51019170	0.0246831	0.00115434	0.00409902	0.0375106	0.0066023	-	-	2.24056
BRD-K62993927	0.0246821	0.00741069	-0.00183475	0.0409119	0.00287632	-	-	3.12724
BRD-K41033343	0.0246714	-0.00148575	0.0125878	0.0371506	0.00109028	-	-	6.26573
BRD-K38904629	0.0246674	0.0110197	0.00708653	0.0243876	0.00684099	-	-	3.07077
BRD-K76439996	0.0246615	0.0074109	0.000543272	0.0458965	-0.00452774	-	-	4.00147
BRD-K90594901	0.024649	0.00629258	0.00269918	0.028701	0.0116051	OPRD1	Opioid receptor agonist	6.90522
BRD-K26301430	0.0246274	0.012062	0.00363515	0.0265335	0.007024	-	-
BRD-A43087975	0.0246262	-0.000722281	0.00303887	0.0424674	0.00446839	-	-	2.90506
RS-16566	0.0245904	0.00684404	0.00511869	0.034885	0.00233297
BRD-K84988480	0.0245818	0.00561489	0.00605175	0.0261355	0.0113615	CCR5	CCK receptor antagonist	5.27521
BRD-K75996234	0.0245668	0.00684358	0.00456844	0.0338141	0.00390745	-	-	2.90788
BRD-K99944604	0.024564	0.0133702	-0.00747135	0.0320949	0.0111344	-	-	7.41902
BRD-K47811236	0.024562	0.00623107	-0.0029909	0.0315134	0.0143705	-	-	5.46078
BRD-K94903598	0.024561	0.00752927	0.00106875	0.0325837	0.00794028	-	-	7.45011
BRD-K14493775	0.0245451	0.00780122	-0.000571855	0.0429568	-0.00109591	-	-	3.81772
SA-440772	0.0245424	0.00907645	0.00574841	0.0364504	-0.00219057	-	-	8.51684
BRD-K56253099	0.0245349	0.00774625	-0.00409722	0.041493	0.00392778	-	-
BRD-K40220562	0.0245256	0.00576619	-0.00469488	0.0433756	0.00460417	GLRA3	Glycine receptor antagonist, Acetylcholine receptor antagonist	4.79883
BRD-K36203049	0.0245162	-0.00147882	0.00660948	0.0419931	0.0019087	-	-	3.81721
BRD-K73928524	0.0245039	-0.00302525	0.00640934	0.0407169	0.0049068	-	-	4.32284
BRD-K86379744	0.0245006	0.00113684	0.00902942	0.0331298	0.00570508	-	-	4.01218
BRD-K56398628	0.0245002	-0.0017187	0.00214127	0.0515935	-0.0030156	-	-	1.89882
BRD-K74968522	0.0244985	0.00086213	0.00725683	0.0326865	0.00819158	SLC18A1, SLC18A2	Catecholamine depleting sympatholytic	1.67622
BRD-K86694468	0.0244969	-0.00514054	-0.00481087	0.0597973	-0.000852136	-	-	2.09092
VUF-5681	0.0244867	0.00146358	0.00242575	0.0369261	0.00815788	-	-	3.43301
BRD-K04078927	0.0244819	0.00084789	0.000517789	0.0413368	0.00626143	-	-	3.02517
BRD-K52152765	0.0244746	0.00733764	-0.00015371	0.0287511	0.0130142	-	-	3.28617
BRD-K39029546	0.0244745	0.00263197	-0.00027695	0.0286079	0.0179861	-	-	3.38564
oxymetazoline	0.0244684	0.0106873	0.00144608	0.031155	0.0056483	-	-	2.9352
motesanib	0.0244536	0.000604569	0.00591679	0.0445731	-0.00218735	-	-	3.39737
BRD-K61366105	0.0244426	0.00832965	0.00443872	0.0275011	0.00861587	-	-	2.9912
PF-562271	0.0244259	0.00425236	-0.00696819	0.0605953	-0.00902768	-	-	3.42152
BRD-K63841469	0.0244206	0.00121157	-0.000680641	0.0361087	0.0122016	-	-	3.75761
BRD-K17765399	0.0244144	0.00857879	0.00118861	0.0371199	0.00194158	-	-	8.92821
BRD-A69429454	0.0244109	0.00679348	0.00150308	0.0419835	-0.00145827	-	-	2.36807
BRD-K65541951	0.0244083	0.00999893	0.00214802	0.0323825	0.0042871	-	-	6.03314
BRD-K32019201	0.0244073	0.00687554	0.00124032	0.0245684	0.0161304	-	-	2.8861
BRD-K14340046	0.0244056	0.00889717	0.000765096	0.0290596	0.0100893	MMP1	Matrix metalloprotease inhibitor	4.6339
BRD-K73196232	0.0244055	0.00711002	0.00461614	0.0407398	-0.0036549	-	-
BRD-K35788497	0.0244054	0.00501398	0.00779082	0.0315272	0.00447877	-	-	2.18753
BRD-K34423419	0.0244053	0.00367962	0.00458838	0.0329902	0.00755249	-	-	4.7528
BRD-K01192156	0.0243847	0.00541309	0.00304644	0.0306558	0.00965404	-	-	3.69669
BRD-K14961381	0.0243437	0.0101331	0.00569938	0.0218636	0.0109914	-	-	3.63118
BRD-K72800151	0.024329	0.00461925	0.00760856	0.0250362	0.0113939
BRD-K03791970	0.0243269	0.00403281	0.0008081	0.0278115	0.0160014	-	-
BRD-K73227539	0.0243222	0.00159303	0.00019684	0.041164	0.00569067	-	-	6.3907
BRD-K33012050	0.0243145	0.000367005	0.00181184	0.0453107	0.00113944	-	-	3.35946
BRD-K72602058	0.0243141	0.0073896	0.00284503	0.0304205	0.00797311	-	-
BMS-777607	0.0243135	0.00282248	-0.00101748	0.0476418	-0.000819895	-	-	2.6359
BRD-K31222955	0.0243039	0.0133582	-0.00081645	0.0257278	0.0103382	-	-	3.92
BRD-K95656102	0.0242969	0.0068074	-0.0034165	0.0370174	0.00818546	-	-	3.77276
BRD-K49409924	0.024292	0.00864576	0.00377259	0.0328073	0.00335831	-	-	2.84273
BRD-K72609445	0.024284	0.0105583	0.00321311	0.033346	0.00145061	-	-
BRD-K95273033	0.0242747	0.00204282	0.000419021	0.0504927	-0.00440514	DRD2, ADRA1A, HTR1A, HTR2A, HRH1, DRD3, HTR2C, HTR1D, DRD4, ADRA1B	Dopamine receptor antagonist, Serotonin receptor antagonist	4.46098
BRD-K48388979	0.0242706	0.00988999	-0.000159365	0.0447344	-0.00592384	-	-	3.67913
BRD-K33179234	0.0242668	0.01612	0.00145937	0.0218411	0.00911315	-	-	3.25189
BRD-K65888165	0.0242636	0.012028	0.00119024	0.0384836	-0.00317454	-	-	3.1848
BRD-K38051696	0.0242585	0.0127847	0.00403819	0.0217986	0.00989558	-	-	4.83483
CCT036477	0.0242573	-0.00444299	-0.00433776	0.046725	0.0105704	-	-
BRD-K45569026	0.0242528	0.0104749	-0.00455696	0.0332018	0.00938575	-	-	3.48729
BRD-K46396728	0.0242514	-0.00324141	0.00772975	0.0337674	0.010247	-	-	2.40634
BRD-K75944637	0.0242508	0.00143526	0.00486658	0.0280849	0.0141148	-	-	2.607
BRD-K77504251	0.0242429	-0.00219551	0.00564856	0.0387812	0.00625159	-	-	6.35087
BRD-K68102868	0.0242365	0.00649256	-0.0017503	0.0337033	0.0100274	-	-	4.10815
ME-0328	0.0242305	0.0102772	0.00639604	0.0329935	-0.0012059	-	-	3.06589
BRD-K26018295	0.0242257	0.00311858	0.0104241	0.0382458	-0.00333701	-	-	3.25471
pentobarbital	0.0242172	0.00508368	0.00429358	0.029473	0.00958419	-	-	1.74141
BRD-K02403042	0.0242116	0.00601624	0.00513483	0.0330867	0.00418553	-	-	5.1751
BRD-K76154866	0.02421	0.00667213	0.00948038	0.0266149	0.0056525	-	-	6.09428
BRD-K99300752	0.0241834	0.013394	0.00220478	0.018684	0.0140841	-	-	2.957
BRD-K67862512	0.0241809	-0.000810685	-0.00151446	0.0418865	0.00880041
BRD-K31300534	0.024169	0.0116129	-0.00078856	0.0274578	0.0100558	-	-
BRD-K88671928	0.0241635	-0.000255378	0.00336107	0.0421274	0.00309388	-	-	5.20663
ondansetron	0.0241617	0.0146198	-0.00285289	0.0441087	-0.00755228	-	-	4.59328
BRD-K83625314	0.0241428	0.00739468	0.00329254	0.034229	0.00336937	-	-
BRD-K92008394	0.02413	0.00019947	0.00615556	0.03692	0.00498499	-	-	4.46041
BRD-K51520673	0.024127	0.0040558	0.00520695	0.0417567	-0.00276538	-	-	4.83311
BRD-K96619480	0.0241208	0.00736729	-0.00132498	0.0362682	0.00593112	-	-	2.83045
BRD-K59955428	0.0241189	0.0124529	-0.00112335	0.0331637	0.00374469	-	-	2.55646
BRD-K71879957	0.0241182	0.00561281	0.00143054	0.0276897	0.0135033	-	-	3.78399
BRD-K72754669	0.0240958	0.00699749	0.00524593	0.0259213	0.0100269	-	-
BRD-K53127464	0.024092	0.00928215	-0.00063401	0.0267629	0.012773	-	-	1.74915
BRD-K43782839	0.0240784	0.0118213	-0.00527411	0.0415672	4.228e-05	-	-	3.45684
BRD-K19385772	0.0240729	0.0110179	-0.000358778	0.0277705	0.00971609	-	-	2.59035
TCS-359	0.0240588	0.00295546	-0.00318923	0.0412223	0.00712913	-	-	3.82352
BRD-K73261251	0.0240428	0.00365233	0.00311853	0.0262421	0.0150727	-	-	3.24153
BRD-A78355490	0.0240347	0.00650363	-0.0030653	0.0356494	0.00898169	-	-
BRD-K69834831	0.0240301	0.00827711	0.00293497	0.0303321	0.00651606	TUBB	Tubulin inhibitor	5.63152
lorazepam	0.024019	0.00912111	-0.00228654	0.0391352	0.00206831	FDPS	Osteoclast inhibitor, Bone resorption inhibitor	1.99963
BRD-K00463125	0.0240151	0.0135266	-0.00103952	0.0318522	0.00369096	-	-	3.94733
BRD-K73143149	0.0240111	0.00997513	0.003922	0.0254158	0.0087092	-	-
BRD-K59974052	0.0240032	0.00391427	0.001679	0.0298527	0.0125604	-	-
BRD-K17893805	0.0239976	0.00666598	0.00608138	0.034323	0.00092485	-	-
BRD-K59204160	0.0239899	9.33622e-05	0.000315884	0.0369108	0.0106597	-	-	3.78696
BRD-K11442063	0.0239766	0.00469702	0.00205012	0.0375619	0.00364412	-	-	3.20405
BRD-K23430405	0.0239606	-0.0006193	0.00137987	0.0361447	0.011016	-	-	2.02284
BRD-K55981249	0.0239606	0.00475493	-0.00268231	0.043186	0.00266248	-	-	2.17807
BRD-K40738002	0.0239397	0.00376922	0.0061992	0.0253036	0.0126073	-	-	2.68611
BRD-K65178566	0.0239374	0.00812171	-0.00057717	0.023932	0.0163983	-	-	3.15128
BRD-K30963311	0.023937	0.00689717	0.00313856	0.0325316	0.00530672	-	-	4.01214
BRD-K05649470	0.0239294	0.0104036	0.00164037	0.0381019	-0.00228701	-	-	2.74644
ST-014075	0.02392	0.00440461	0.00184751	0.0419407	-0.000352875	-	-	1.70873
BRD-K86774687	0.0239185	0.00081257	0.0026678	0.0411291	0.00322743	-	-	3.12505
clonidine	0.0239164	0.00744487	0.00336371	0.0301756	0.00684859	ERBB4, EGFR, ERBB2	EGFR inhibitor	3.06929
pinitol	0.0239048	0.0045731	-0.00255864	0.049039	-0.00324382	-	-	3.31644
BRD-K54673054	0.0239035	8.25227e-05	-0.00116802	0.0519	-0.00300751
BRD-K49490091	0.0238958	0.00990094	0.00576268	0.031025	0.00110292	-	-	4.00289
BRD-K92929998	0.0238791	0.0179926	-0.00257643	0.0301264	0.00221572	-	-	4.42135
BRD-K95607309	0.0238771	0.00257997	0.00546267	0.0413406	-0.00162898	-	-	2.41753
BRD-K53475565	0.0238685	0.00534926	-0.00519707	0.0381961	0.00938871
BRD-K77422873	0.0238586	0.00139747	0.00306571	0.0443352	-0.00108114	-	-	3.3917
BRD-K80789291	0.0238507	0.0190182	-0.00239292	0.0269232	0.00415295	-	-	3.83068
camicinal	0.0238466	0.00907016	0.00116962	0.0400639	-0.00261048	-	-	1.72209
BRD-K59606716	0.0238304	0.00630527	0.00289664	0.0321271	0.0063318	-	-	4.37043
BRD-K30173420	0.0238271	0.00842642	0.00071037	0.0338637	0.00465367	-	-	2.26402
BRD-K52500055	0.023821	0.0055501	0.00305176	0.0423075	-0.00326745	-	-
BRD-K80535598	0.0238206	-0.00135486	0.00659738	0.0352713	0.00712741	-	-	4.15117
BRD-K74176533	0.0238071	0.0057881	-0.00344149	0.0399148	0.0053527	-	-	3.1085
BRD-K04181823	0.0238038	0.0082542	0.00073232	0.023931	0.01469
BRD-K83025131	0.023785	0.000377301	-0.00578131	0.0401964	0.0127777	-	-	2.5428
BRD-K72034944	0.0237778	-0.00359959	0.00632698	0.0376416	0.00718671	-	-
BRD-K51411441	0.0237768	0.00035602	0.00757474	0.0314403	0.00818259	-	-	3.17878
BRD-K53168433	0.023775	0.00440598	0.00276716	0.0449808	-0.0046039	-	-	3.75808
BRD-K67891857	0.0237651	-0.00395475	0.00693225	0.0398409	0.00471183	-	-	4.41988
BRD-K23664196	0.0237637	0.00593821	-0.00100236	0.0320849	0.0105066	-	-	3.38564
BRD-A34774643	0.02375	0.0105447	-0.00034208	0.0191472	0.0181503	-	-	3.2657
BRD-K71540055	0.0237487	0.000448508	0.00129385	0.0416559	0.00409911	-	-	2.87129
BRD-A03121430	0.023748	0.00416156	0.00655195	0.029248	0.00753456	-	-	3.00558
BRD-K22875057	0.0237372	0.00479578	-0.00096578	0.0433105	0.00033385	-	-	5.07035
BRD-K05076357	0.0237353	0.0118274	0.00120598	0.015869	0.0185681	-	-	4.20888
BRD-A02799884	0.0237299	0.0148039	0.00582789	0.00768812	0.0191399	-	-
BRD-K45817496	0.0237293	0.0138833	-0.0002394	0.0320746	0.00174018	-	-	5.18885
BRD-K62657501	0.0237279	0.00222234	0.0108718	0.0273316	0.0070301	-	-
alogliptin	0.0237252	-0.00445342	0.00447168	0.0418683	0.00556372	-	-	4.27331
BRD-K12896711	0.0237211	0.00684215	-0.00625276	0.038782	0.00807085	-	-	5.75139
tacrine	0.0237177	0.0047513	-0.00377011	0.0516798	-0.00522549	-	-
BRD-K02502363	0.0237169	0.00502836	0.0032687	0.0365527	0.00258397	-	-	3.3901
BRD-K20138377	0.0237135	-0.00205662	0.00497103	0.03587	0.00864254	SLC6A9	Glycine transporter inhibitor	3.89964
BRD-K90061492	0.0237133	0.00150075	0.00250826	0.0421198	0.00129768	-	-	3.55403
BRD-K35324337	0.0237095	0.00461571	0.00124033	0.0320682	0.00949475	-	-	2.57752
BRD-K87277021	0.0236966	0.00308132	0.00321084	0.0306182	0.0104829	-	-
BRD-K90294313	0.0236964	0.00208422	0.00551469	0.03011	0.00968384	-	-	6.40368
BRD-K46734661	0.0236816	0.00848244	0.00206783	0.0358493	0.000963624	-	-	3.39915
BRD-K15523383	0.0236816	0.00982951	-0.00354799	0.0266945	0.0143871	-	-	3.61
BRD-K96061818	0.023654	0.0111186	0.001781	0.0303815	0.00402685	-	-
BRD-K16976282	0.0236539	0.00887145	0.00627767	0.0274161	0.00474258	-	-
BRD-K84790105	0.0236503	0.00595187	0.0004126	0.0239602	0.0169758	-	-	2.96874
BRD-K05745800	0.0236496	0.00681353	-0.00215309	0.0356872	0.00695152	-	-	1.81945
BRD-K32881384	0.0236431	-0.00167731	0.00940106	0.0315729	0.00798948	-	-	2.40127
BRD-K35219796	0.0236285	0.0135796	0.000230901	0.0269562	0.00649012	-	-	2.53001
BRD-K40145790	0.0236192	0.00998673	-0.00092395	0.022667	0.0155086	-	-	2.87307
diclofenamide	0.0236181	0.00568646	-0.00488265	0.0338895	0.0125428	-	-
BRD-K14706855	0.023616	0.0127978	0.00189252	0.0254971	0.00704466	-	-	6.52667
fluconazole	0.0236133	0.00709626	-0.000553731	0.0304523	0.0102317	-	-	3.40853
BRD-K22584556	0.0236099	0.00370315	-0.00017193	0.032919	0.0107695	-	-	2.5975
quetiapine	0.0236094	0.000336689	-0.00222597	0.0369477	0.0121604
BRD-K10864752	0.0236075	0.0137415	0.00751037	0.00771994	0.0182432	-	-
tenoxicam	0.0235842	0.000174417	0.0055905	0.0390553	0.00234817	-	-	4.33789
BRD-K75669394	0.0235716	0.00716765	0.00020487	0.033165	0.00660579	-	-	3.39435
BRD-K52669647	0.0235676	0.00912455	0.00197209	0.0199139	0.0161247	-	-
BRD-K63442512	0.0235508	0.0024215	-0.00388955	0.0479864	0.000583354	-	-
BRD-K84239628	0.0235505	0.0161539	0.00608275	0.0224723	0.0023921	-	-	3.1782
geranylgeraniol	0.0235464	0.0047319	0.00757084	0.0351619	-0.000371758	-	-	3.42039
BRD-K57037351	0.0235426	0.00422661	-0.000273842	0.0328795	0.0102531	HRH1, KCNH2	Histamine receptor antagonist	7.89074
BRD-K62427254	0.0235419	-0.00419383	-0.000908539	0.0432583	0.0089278	-	-	4.8981
BRD-K01283689	0.0235367	-9.149e-05	0.00571012	0.0289544	0.0125003	-	-
BRD-K14392329	0.0235363	0.00237333	-0.0008093	0.0256882	0.0198203	-	-	3.0686
BRD-K58698092	0.0235344	-0.000856045	0.00228276	0.031771	0.0138711	-	-	4.09251
BRD-K15980298	0.0235302	0.0119022	0.000532416	0.0240919	0.0105339	HTR2C	Serotonin receptor antagonist	4.38867
BRD-K11826883	0.02353	0.0056194	-0.00420273	0.049876	-0.00423264	-	-
BRD-K84855052	0.0235286	0.00874113	0.00516894	0.0233728	0.00977436	-	-	4.147
potassium-canrenoate	0.0235262	0.0116588	-0.000326346	0.0337172	0.00200275	-	-	2.88717
BRD-K95515654	0.0235233	0.00782556	0.00903352	0.0276223	0.00256515	-	-	3.43598
BRD-K00954272	0.0235232	0.0187438	0.00367724	0.0228918	0.00173362	-	-	3.89529
BRD-K26569518	0.0235138	0.00452171	0.000252101	0.0308807	0.011373	-	-
BRD-K00892322	0.0234909	0.00341824	0.000998107	0.0370921	0.00547326	-	-	2.25565
BRD-K45050268	0.0234878	0.00208246	0.00939185	0.0365265	-0.00102514	-	-
BRD-K03730976	0.0234806	0.00372003	0.00247997	0.0340509	0.00671024	-	-	2.91246
BRD-K54067431	0.0234794	0.00440837	-0.00226142	0.0375793	0.00723255	KCNJ11	Potassium channel activator	4.38505
BRD-K34573818	0.0234742	0.00820611	0.00352746	0.027139	0.00807583	-	-	4.21293
BRD-K77273736	0.0234713	-0.00112984	0.00628388	0.0341757	0.00761286	-	-	1.56859
BRD-K73880067	0.0234685	0.00730297	-0.00015028	0.019754	0.0200303	-	-	4.49386
BRD-K74713361	0.0234588	0.00698771	0.000713611	0.0492183	-0.010002	SCN10A, SCN9A, SCN5A	Histamine receptor agonist	5.58364
BRD-K57082361	0.0234575	0.00728107	0.000861737	0.0354186	0.00335365	-	-	3.54778
BRD-K73206088	0.0234515	0.0120196	0.00253617	0.0244688	0.00787842	-	-	1.81707
harmane	0.023444	-0.00362933	0.00396449	0.0336329	0.0129199	-	-	6.6297
BRD-K63545954	0.0234435	0.0079594	0.00379394	0.0287361	0.00639755	ADRB2	Adrenergic receptor agonist	5.8805
BRD-K83393282	0.0234395	0.00284506	0.00201429	0.0282654	0.0137542	-	-	2.54962
benidipine	0.0234094	-0.000817577	-0.00343464	0.0381631	0.0129078	-	-	1.95065
BRD-K51843685	0.0234076	-0.00457875	0.00713745	0.0392155	0.00504103	-	-	3.31177
BRD-A29731977	0.0234032	0.00534845	0.00277574	0.0393974	-0.000715277	-	-	1.05281
BRD-K50210179	0.0233617	0.00270296	0.0040858	0.0319042	0.00803047	-	-	4.1812
BRD-K39963927	0.0233595	0.00428823	-0.00299468	0.0365022	0.00892331	-	-	5.0194
BRD-K64073423	0.0233572	0.0111437	-0.00174673	0.0282238	0.00909365
BRD-K70012251	0.0233558	0.0131	-0.00684354	0.0367837	0.00367151	-	-
BRD-K04021565	0.0233557	0.00166808	0.00261386	0.0355018	0.0069277	-	-	3.0536
BRD-K67094066	0.0233515	0.00820874	-0.0064197	0.0442721	0.000641815	-	-
BRD-K05250921	0.0233447	0.00986889	0.00631702	0.0168266	0.0136769	-	-	2.3434
BRD-K07071690	0.0233422	0.00483219	0.00438608	0.0316208	0.00584533	-	-	4.28065
BRD-K23404017	0.023337	0.0116334	0.00330793	0.0276578	0.00407494	-	-	2.88513
BRD-K87226815	0.0233329	0.00651464	-0.00588714	0.0321397	0.0138986	AURKA, AURKB	Aurora kinase inhibitor	3.30687
BRD-K05032830	0.0233292	-0.00250814	0.000870165	0.0317267	0.0165697	AOC1	Angiotensin converting enzyme activator, DNA intercalator, Topoisomerase inhibitor	2.53802
BRD-K54876931	0.0233243	0.00212043	0.00545808	0.0433956	-0.00432558	-	-
BRD-K12132598	0.0233032	0.00582593	0.00120342	0.030586	0.00899102	-	-	3.3605
BRD-K29622226	0.0232814	0.00742748	0.00347895	0.0292068	0.00644955	-	-
BRD-K34256721	0.0232729	0.00316625	0.00582659	0.0297866	0.00776636	-	-	3.48496
SA-1939891	0.0232618	0.00876634	2.1179e-05	0.0266961	0.01104	-	-	3.15542
BRD-K95913506	0.0232597	0.00662068	0.00722966	0.0164555	0.0162135	-	-	2.11437
cefadroxil	0.0232596	0.00203664	0.00394138	0.0420956	-0.00155455	-	-	2.90907
BRD-K24978625	0.0232497	0.00655162	0.00120396	0.0298408	0.00890307	KCNH2, HTR4	Serotonin receptor agonist	4.2465
BRD-K73658839	0.0232486	0.0130901	0.00319586	0.0252699	0.00494148	-	-	2.55431
BRD-K00846846	0.0232465	0.0084647	0.00201493	0.0233051	0.0127084	-	-	2.45609
BRD-K09879686	0.0232408	0.00268188	0.00256285	0.0336561	0.00758074	-	-	3.38279
BRD-K37344040	0.0232371	0.00857019	-0.00652754	0.0427878	0.00164383	-	-
BRD-K14203250	0.0232192	0.00759343	0.00599003	0.024907	0.00794798	-	-	6.45991
BRD-K89599747	0.0232153	0.0133666	-0.00221799	0.0239875	0.0112946	-	-
KU-C103672	0.0232003	0.010657	0.00477885	0.0316416	-0.000676824	-	-
BRD-K91766181	0.0231926	0.00216021	0.0104059	0.0237334	0.0100856	-	-	3.56846
BRD-K06892639	0.023189	0.0133459	0.00412279	0.024019	0.00489026	-	-
isradipine	0.0231824	-0.00355834	0.00322373	0.0424766	0.00422278	-	-	1.34997
BRD-K49723782	0.0231749	-0.00434786	5.67062e-06	0.0443255	0.00636638	-	-	1.17738
BRD-A52024592	0.0231547	0.00911857	0.00644639	0.0246452	0.00609921	-	-	4.21537
BRD-K77354700	0.0231532	0.00495198	0.00222634	0.0249066	0.0142215	-	-	3.26693
BRD-K51087734	0.0231477	0.00346525	0.0059491	0.0274922	0.00938876	IKBKB	IKK inhibitor	3.79105
BRD-K14489740	0.0231417	-0.0026622	-0.0061634	0.0494843	0.00562469	-	-
BRD-K48038858	0.023129	0.00979562	0.000908549	0.0296982	0.0058557	-	-
acronycine	0.023126	-0.00134386	0.00237649	0.0308075	0.014412	-	-	4.80954
BRD-K36446300	0.0231182	0.00731765	0.00197737	0.0309292	0.00601205	-	-	3.98743
BRD-K03651051	0.0231163	0.00285065	0.00468283	0.0344902	0.00420879	-	-	2.67176
BRD-K71531260	0.023116	0.0199214	-0.00226398	0.0224194	0.00615529	-	-	2.10517
BRD-A74983348	0.0231138	0.000559639	0.00219545	0.0348581	0.00861436	-	-	4.12571
BRD-K13234528	0.0231123	-0.0020519	-0.00534805	0.0428169	0.0108076	-	-	4.18738
linifanib	0.0231109	0.00763617	-0.00212605	0.0491904	-0.00847872	-	-	5.46519
BRD-K22384464	0.0230974	0.00342124	0.00025147	0.0315415	0.0109806	-	-	3.86099
BRD-K38681012	0.0230965	0.0061203	-0.00276428	0.0340031	0.00883393	-	-
abiraterone	0.0230931	-0.00377512	0.00654938	0.0372663	0.00614569	-	-	3.22856
BRD-K51106827	0.0230923	-0.000570643	-0.000833278	0.0414026	0.00618603	-	-	2.47974
BRD-K69435400	0.023092	0.00801933	-0.000974853	0.0352363	0.00390327	-	-	3.13181
EMF-csc-9	0.0230896	0.00016168	-0.004543	0.0432228	0.00733768
BRD-K13090434	0.0230876	0.00104381	0.00470976	0.0342375	0.00618407	-	-	3.63119
BRD-K20644549	0.0230823	0.00281759	0.00672344	0.0246959	0.0119276	-	-	1.66435
BRD-K56593426	0.0230815	-0.00660417	0.00143675	0.0539967	-0.00266623	-	-	2.59782
BRD-K68084083	0.0230731	0.00790731	0.00623266	0.0254662	0.00654001	-	-	3.64888
BRD-K78828094	0.0230723	-0.00038318	0.00495883	0.037352	0.00421689	-	-	3.9277
favipiravir	0.0230692	0.00981758	0.00216291	0.0286934	0.0054646	-	-	3.50438
BRD-K12460566	0.023065	0.00858164	-0.00175413	0.0329636	0.00633884	-	-	5.9129
BRD-K95323755	0.0230537	-0.0006736	-0.00025378	0.0373877	0.00964713	-	-	3.99909
BRD-K56658444	0.0230526	0.0106997	0.00245709	0.0314746	0.00147385	-	-	4.59997
BRD-A14484404	0.0230398	0.00912848	0.00561704	0.0258977	0.00543652	-	-	4.89206
cobicistat	0.0230304	0.00320527	-0.000126407	0.0308165	0.0121655	-	-	4.30302
BRD-K81079621	0.0230299	0.00338574	0.0045883	0.0314582	0.00662755	-	-
BRD-K49424866	0.0230253	-0.00188964	0.0059444	0.0318817	0.0101142	-	-
BRD-K73737710	0.0230222	0.00791792	0.000521339	0.0258588	0.0117463	-	-
DFCI-LW11	0.0230097	-0.00631831	0.00259535	0.0453654	0.00437697	-	-	3.89638
BRD-K28139946	0.0229987	0.00757811	0.00372931	0.0285839	0.00610609	-	-	2.42714
BRD-K81104218	0.0229969	0.0066461	0.00428912	0.026416	0.00864263	-	-	5.7442
BRD-K47510632	0.022984	0.0111691	0.00216087	0.0316814	0.00095677	-	-	3.3746
RHC-80267	0.0229805	0.00226126	-0.00824016	0.0442934	0.0076465	-	-	3.80473
BRD-K41574232	0.0229752	0.0146318	0.00013292	0.0194757	0.0117099	-	-	3.80098
epinastine	0.0229654	0.0137195	0.000626609	0.0359215	-0.00433689	-	-	3.54304
BRD-K24565544	0.0229585	0.0056065	0.0125271	0.0259613	0.00182218	-	-	4.33508
BRD-K46737746	0.022958	0.0105898	-0.00032509	0.0233104	0.0123409	-	-	4.17586
BRD-K46445327	0.0229578	0.00743256	0.00259011	0.0390321	-0.00313908	-	-	3.5722
BRD-K40252598	0.0229546	0.00139436	0.00647378	0.0287719	0.0092691	-	-	4.46041
citalopram	0.0229545	0.00760955	-0.00279234	0.0429098	-0.00181806	-	-
BRD-K07438795	0.0229487	0.00243251	0.00168443	0.0356422	0.00613817	RORC	ROR antagonist	6.99684
BRD-K57754556	0.0229476	0.00574991	0.00160091	0.0350572	0.0034872	-	-	4.44242
BRD-K30463976	0.0229463	0.00789653	-0.000946833	0.0291936	0.00974939	-	-
BRD-K92374432	0.0229462	5.986e-05	-0.00179882	0.0361146	0.0115168	-	-	5.20162
BRD-K59015387	0.0229401	0.0137632	-0.000759314	0.0242293	0.00864694	-	-	3.77841
BRD-K13941175	0.0229367	0.00706039	0.00568595	0.0345505	-0.0014234	-	-	2.6466
BRD-K57701450	0.0229345	0.00800279	-0.00248705	0.0314286	0.00892459	-	-	2.45735
BRD-K18321170	0.0229313	0.000757556	0.00302376	0.0327636	0.00931774	-	-	3.0267
FU-JMBII127B	0.0229303	0.01104	-0.00515416	0.0371938	0.00278084	-	-	2.74276
BRD-K32082369	0.022929	0.00836387	0.00171563	0.032947	0.00283146	MAOA, MAOB	Bacterial 50S ribosomal subunit inhibitor	4.47528
BRD-K25649458	0.0229247	0.00554636	0.00222051	0.039059	-0.00097648	ACHE	Acetylcholinesterase inhibitor	7.02775
proguanil	0.0229227	-7.05004e-05	0.00756661	0.0246987	0.0136507	-	-	4.22316
BRD-K76755209	0.0229147	0.0040374	-0.00400959	0.0433477	0.00245382	-	-	4.59573
BRD-K84864079	0.0229145	0.00673719	-0.00258605	0.0430261	-0.00134817	-	-	4.92531
BRD-K26048698	0.0229101	-0.000220866	-4.80951e-05	0.0395258	0.00656334	-	-	5.22203
BRD-K22380647	0.0229079	0.0110442	-0.00058353	0.023917	0.0114381	-	-	4.35163
BRD-K08508488	0.0229039	0.00913352	0.0074707	0.0221201	0.00708359	-	-	3.31612
BRD-K47443018	0.022902	0.0157468	-0.00578286	0.0354909	0.000349215
BRD-A67508925	0.0229018	0.00322696	0.00145154	0.0301383	0.0109869	-	-
BRD-K65824347	0.0228992	0.00148767	-0.0125554	0.0464267	0.0104394	-	-	3.34756
BRD-K92770212	0.0228974	0.00439267	0.00503661	0.0295872	0.0067783	-	-	3.03024
BRD-K22135724	0.0228941	0.00807282	-0.00402752	0.0375234	0.00421946	-	-	4.19527
BRD-K70237115	0.0228875	0.00836416	-0.00340451	0.0188273	0.0219881	-	-
BRD-K75746738	0.0228856	0.00027673	0.00469398	0.0334381	0.00736233
BRD-K61161989	0.0228847	0.00431224	-0.00345853	0.047463	-0.00254723	-	-	2.92075
BRD-K74192638	0.0228842	0.00572412	-0.00235773	0.0354388	0.00696328	-	-	4.09917
BRD-K08702524	0.0228842	0.00486609	0.00778169	0.0266746	0.00644598	-	-	3.38532
BRD-K78904317	0.0228797	0.0115803	-0.00403659	0.0354245	0.00279127	-	-	4.56458
BRD-K91467861	0.022875	0.00461224	-0.00076999	0.0304964	0.0114113	-	-	3.93848
BRD-K17973355	0.0228688	-0.00245564	-0.00387363	0.0500561	0.0020108
BRD-K64404450	0.0228639	0.00921515	-0.00035666	0.0234886	0.0133807	-	-	3.77136
BRD-K51640940	0.0228628	0.00774805	-0.00186753	0.0402799	-0.000434778	-	-	3.41875
BRD-K52231520	0.0228622	0.00324135	0.00074632	0.0395426	0.00219403	-	-	4.00294
BRD-K96238295	0.0228542	0.00265515	-0.00126094	0.0354532	0.00886103	-	-
solanine	0.0228499	0.00311861	-0.00464215	0.0374342	0.00978915	-	-
BRD-K56013842	0.0228495	0.00325497	-2.326e-05	0.03445	0.00801723	-	-	3.63903
BRD-K35909757	0.0228473	0.0008131	0.00314462	0.032578	0.00915885	-	-
SR-147778	0.0228362	0.00700579	-0.000355651	0.0354521	0.00357007	-	-	3.96453
BRD-K46924722	0.0228338	0.004939	0.00296839	0.0313701	0.00639018	-	-	3.70934
BRD-K15460493	0.0228319	0.0170217	0.00122391	0.0146931	0.0127251	-	-	5.91474
BRD-K63188051	0.0228233	0.00821401	0.00214904	0.0189386	0.016345	-	-	2.81049
BRD-K92759025	0.0228206	0.00273919	0.00592852	0.0300375	0.00693597	-	-	4.37824
BRD-K87951090	0.0228111	0.00329717	0.00174215	0.0230918	0.017491	IL12A	Interleukin synthesis inhibitor	3.62862
BRD-K47461610	0.0228059	0.00613694	0.00011991	0.0359078	0.00344706	-	-
BRD-K63668467	0.0228049	0.0122832	-0.00633381	0.0397178	-5.748e-05	-	-	2.36283
ANR-94	0.0228034	0.00132705	-0.00522782	0.0464137	0.00309384	GNPTAB	GLCNAC phosphotransferase inhibitor	0.816016
BRD-K40840224	0.0228013	0.00688669	0.011093	0.0322336	-0.0046107	-	-	2.54936
BRD-K29150200	0.0227973	0.00946465	0.000680472	0.0336509	0.00179864	-	-	5.05588
ampicillin	0.0227841	0.000683869	0.000483013	0.0414026	0.00299865	NR3C1	Glucocorticoid receptor agonist	1.39305
AR-A014418	0.0227836	0.00601823	-0.00446298	0.0464611	-0.00244916	ADRB1, ADRB2	Adrenergic receptor antagonist	3.08328
BRD-K02530287	0.022778	0.00836981	0.00391694	0.0162748	0.0169944	-	-
BRD-K35711197	0.0227743	0.0100793	0.00380792	0.0250322	0.0066292	-	-	4.22368
BRD-K92446632	0.022771	0.00246659	0.00713821	0.0263105	0.00962662	PPARG	PPAR receptor agonist	5.7895
BRD-K26759399	0.0227707	0.0107213	0.000806177	0.0320919	0.00192197	-	-	2.47186
BRD-K68945047	0.0227706	0.00174237	0.00228872	0.043861	-0.00235101	-	-	3.81612
BRD-K96258717	0.0227684	0.0136193	-0.00144096	0.0300093	0.00334914	-	-	3.34641
BRD-K61439332	0.0227529	-0.00176672	0.0031148	0.0385722	0.00558553	-	-	3.63245
BRD-K21364577	0.022751	0.004822	-0.0014292	0.0351145	0.00699479	-	-	4.28506
BRD-K62554329	0.0227496	0.00539206	0.00182292	0.032699	0.00558529	-	-	4.05299
BRD-K51061297	0.0227461	0.00290143	0.00845712	0.0323962	0.0017374	-	-	3.80322
BRD-K05857732	0.0227441	0.0009331	0.00528647	0.0286149	0.0106536	-	-	5.90856
BRD-A96007399	0.0227428	0.0078548	0.00031057	0.0290228	0.00829755	-	-	4.0305
BRD-K79983157	0.0227395	0.00189377	0.00173722	0.043285	-0.00143706	-	-	3.45676
bexarotene	0.0227308	-0.0011487	-0.0021538	0.0398896	0.00887447	-	-	2.8704
BRD-K54053991	0.0227293	0.00874785	0.00261012	0.0316405	0.00246006	-	-	3.7376
BRD-K66898048	0.022724	0.00707163	5.08419e-05	0.0296002	0.00872532	-	-	3.78708
BRD-K91633589	0.0227225	0.0092742	0.000443183	0.0280298	0.00769785	-	-
BRD-K39639513	0.0227194	0.00056987	0.0084581	0.0403322	-0.00392135	-	-	1.81945
BRD-K77053712	0.0227168	0.000313751	0.00337753	0.0315295	0.0102128	-	-	3.71649
BL-050	0.0227153	0.009906	-0.00377753	0.0361203	0.00318183	-	-
BRD-K55569103	0.0227099	0.000254443	0.0152346	0.0359864	-0.0060557	-	-	6.11101
BRD-K72271119	0.0227087	0.0205105	-0.000949892	0.0267073	-0.000850488	-	-	3.7646
BRD-K05041276	0.0227084	0.00149675	-0.00251806	0.0345773	0.0118608	-	-
BRD-K51454562	0.022706	0.0151709	0.00527382	0.0307355	-0.00576814	-	-	3.29878
BRD-K95392673	0.0227053	0.00607976	-0.00649427	0.0512726	-0.00544752	-	-	3.12724
sericetin	0.022696	0.00285119	0.00545661	0.0368409	0.000243267	-	-	3.0156
BRD-K73876582	0.0226898	0.00671986	-0.00166686	0.0325695	0.00775712	-	-	3.3731
BRD-K01639343	0.022688	0.0107747	0.00654484	0.0256947	0.00236164	-	-	3.39825
BRD-K35635568	0.0226864	0.00960837	0.00276423	0.026267	0.00673316	-	-
BRD-K94258680	0.0226758	0.00613939	-0.00423368	0.0377396	0.00570623	-	-	4.20871
oxaprozin	0.0226733	0.00235045	0.000908427	0.0333207	0.00876702	-	-
BRD-K02876750	0.0226662	0.00335445	0.00140307	0.0344091	0.00616572	-	-	3.53225
BRD-K46401069	0.0226624	0.00385523	0.00510425	0.0323906	0.00397465	CA1	PPAR receptor agonist, Beta amyloid inhibitor	2.60341
BRD-K57226763	0.022654	0.0113799	0.00111608	0.016312	0.0164999	PDK1, PDPK1	Pyruvate dehydrogenase kinase inhibitor	1.5582
BRD-K73952959	0.0226498	0.00420173	0.00455232	0.0246747	0.0118709	-	-	4.34934
BRD-A65592966	0.0226496	0.00385688	6.176e-05	0.0333503	0.00803026	HSP90AB1, HSP90AA1	HSP inhibitor	2.88543
BRD-K20119884	0.0226456	-0.00109875	0.00567445	0.0294304	0.0112852	-	-
BRD-M45755366	0.0226372	-0.00125762	-0.000287536	0.0328333	0.0139862	-	-	3.1872
BRD-K72383170	0.0226251	0.00917016	0.00331814	0.0327014	6.06147e-05	-	-	1.46776
BRD-K54141118	0.0226171	0.00758074	0.00391639	0.0197378	0.0139993
BRD-K20897375	0.0226165	0.00260378	0.00602232	0.0453324	-0.00872562	-	-	2.75405
BRD-K10798676	0.0226145	0.00042327	0.00696431	0.0286846	0.00915678	-	-	4.79098
BRD-K53774864	0.0226047	0.00364963	0.001198	0.0339133	0.00644833	-	-	4.20891
BRD-K38659247	0.0225957	-0.0002875	0.00585756	0.0316387	0.0079826	-	-	3.21777
BRD-K25757224	0.0225942	0.00339463	0.0106611	0.0231911	0.00794163	-	-	2.26163
BRD-K35100006	0.0225886	0.00356627	0.00968045	0.0276486	0.00428193	-	-	6.01834
BRD-K70618663	0.0225827	0.0103879	-0.00440228	0.0383407	0.00083912	-	-	3.55948
LY-2334737	0.0225815	0.00183659	-0.00570485	0.0423054	0.00672594
BRD-K91490997	0.0225802	-0.0037921	0.00655688	0.0293721	0.0130236	-	-	4.69072
BRD-K12336887	0.0225757	0.00413389	0.005063	0.0281009	0.00785349	-	-
BRD-K14207150	0.02256	0.00356353	0.00173949	0.0312302	0.00858684	HTR1D	Serotonin receptor agonist	4.28421
BRD-K11571815	0.0225505	0.00080409	0.00721953	0.0238304	0.013247	-	-	4.11734
BRD-K91836367	0.0225496	0.00358576	-0.00721439	0.0460073	0.00272051	-	-	5.89454
BRD-K56258950	0.022539	0.00856147	0.00209302	0.0182921	0.0161315	MTOR	MTOR inhibitor	2.68779
K-02288	0.0225363	-0.00263963	-0.00116673	0.037006	0.0118729	-	-	7.74031
BRD-K03725349	0.0225348	0.00793047	-0.0043111	0.0484371	-0.00698697	-	-	1.03738
BRD-K74512976	0.022532	0.00937366	-0.00392969	0.0346018	0.00501822	-	-	3.40908
BRD-K75967530	0.0225297	0.00587741	0.00148724	0.0203178	0.0173769	-	-	3.9059
BRD-K44635753	0.0225296	0.00735577	-0.0015389	0.0378058	0.00143666	-	-	4.16356
BRD-K74667984	0.0225288	0.0106376	-0.00485513	0.038121	0.00115417	-	-	2.93973
rhein	0.0225277	0.00734713	0.00577231	0.0286997	0.00323629	-	-	2.55455
BRD-A02241946	0.0225266	0.00228518	0.00234051	0.0214714	0.0189562	-	-
BRD-K30510226	0.0225213	0.0121824	0.00184407	0.0251159	0.00590033	-	-	4.2305
BRD-K92640680	0.0225187	0.0115474	0.00095642	0.0216606	0.010873	HMGCR	HMGCR inhibitor	3.1824
BRD-K24329506	0.0225175	0.00333163	0.00252554	0.0342675	0.00491025	-	-	4.2305
BRD-K10361096	0.0225133	0.00312715	0.00534252	0.0276003	0.00895663	-	-
BRD-K98089885	0.022511	0.0042829	-0.00313339	0.0294274	0.0144451
BRD-K92825272	0.0225106	0.0140866	-0.00115302	0.0207246	0.0113631	-	-
BRD-K68270916	0.0225066	0.00896963	0.0002449	0.0322058	0.00359274	-	-	2.47289
BRD-K57280824	0.0225042	0.0107122	-0.00136646	0.0341908	0.00147199	-	-	2.45962
BRD-A78125048	0.0225039	-0.00023515	0.0124233	0.0284905	0.00432916	-	-	3.53049
BRD-K31030467	0.0225001	0.00512548	-0.00139672	0.0326132	0.00865833	-	-	4.38431
BRD-K58774452	0.0224951	0.00351373	0.00545634	0.0236205	0.0123996	-	-	3.10592
AMG-232	0.0224937	-0.000480689	-0.00114767	0.0440689	0.00254694
BRD-K92023938	0.0224909	0.0052694	-0.00154097	0.0246633	0.0165901	-	-	1.65686
BRD-K18793708	0.0224802	0.00161257	0.0092536	0.0255717	0.00852243	-	-	6.45907
BRD-K44097254	0.0224795	0.00716389	0.000279103	0.0383698	-0.000853831	ADORA2B	Adenosine receptor antagonist	3.024
BRD-K24599650	0.022477	0.00141815	0.0049797	0.029505	0.0090511	-	-	1.63849
BRD-K97277752	0.0224743	0.0106299	0.00121041	0.0313375	0.00177089	-	-	3.02654
BRD-K74042281	0.022472	0.0104392	-0.00531977	0.0388021	0.00102258	ATP4A	ATPase inhibitor	3.93086
BRD-K05363386	0.0224612	0.0122971	0.000881437	0.0281425	0.00360123	-	-	2.78378
BRD-K06157545	0.0224603	-0.00034645	-0.00106537	0.0400453	0.00628706	-	-	3.74532
BRD-K70794677	0.0224583	0.00776237	-0.00114411	0.035029	0.00326939	-	-	2.57475
BRD-K23794511	0.0224549	-0.000150877	0.00703833	0.0295272	0.00849512	-	-	2.16854
BRD-K62758843	0.0224522	-0.00065343	0.00137713	0.033716	0.0104646	-	-	5.77637
BRD-K88748878	0.0224495	0.00332315	-0.0101624	0.0537374	-0.00199912	-	-
BRD-K96703103	0.0224478	-3.76935e-05	0.00421729	0.0309347	0.00978138	-	-	6.79661
BRD-K50010596	0.0224442	-0.000299784	0.00382228	0.0501626	-0.00879668	RYR1	Calcium channel blocker	1.33908
mifepristone	0.0224406	0.00575759	0.00255412	0.0334013	0.00316828	FNTA, FNTB	Farnesyltransferase inhibitor	3.13142
BRD-K69491845	0.0224354	0.00709383	0.00611714	0.0316077	5.224e-05	-	-	3.47914
BRD-K24781739	0.0224321	0.00536721	-0.00277811	0.0394166	0.00285848	-	-	3.39785
BRD-K25784575	0.0224169	0.00818331	0.00230917	0.0225313	0.0118099	-	-	6.89896
hydroquinine	0.022414	0.00460619	-0.00630695	0.0481911	-0.00166243	-	-	3.3145
BRD-K84521734	0.0224114	0.00616912	-0.00137903	0.0327949	0.00723785	-	-	3.99715
BRD-A34891365	0.0224092	0.00701515	0.00082172	0.0176012	0.0193802	-	-	2.36283
BRD-K04378630	0.0224039	0.00060532	0.00508425	0.0391764	-5.811e-05	-	-	4.35424
BRD-K23304679	0.0223882	0.0106867	-0.00656841	0.0318029	0.00885533
tiagabine	0.0223859	0.00095397	0.00822047	0.0434705	-0.00787316	-	-	4.59986
BRD-K10405667	0.022382	0.0058796	0.00154283	0.0271394	0.0102022	-	-
BRD-K21472066	0.0223759	0.00720528	0.00215359	0.0198534	0.0155396	-	-	3.96186
BRD-K68495784	0.0223747	0.0117604	0.00107764	0.0173264	0.0145851	-	-	3.62246
BRD-K79555196	0.0223712	0.00087085	0.0131138	0.0216399	0.00911797	-	-	7.81328
BRD-K62814224	0.0223655	0.00220923	0.000610044	0.0298668	0.012045	-	-	3.38938
BRD-K03308716	0.0223567	0.00115286	0.00673848	0.0268832	0.00993883	KCNA3	Potassium channel blocker	3.80394
BRD-K66590796	0.0223559	0.00478673	0.00524034	0.0228127	0.0118721	-	-	3.10981
BRD-K71247208	0.0223549	0.00481358	-0.00045073	0.0306438	0.00970312
ebelactone-b	0.0223532	0.00233404	0.001266	0.0414881	-0.000381774	-	-	3.106
BRD-K92732825	0.0223517	0.011244	0.00235853	0.0239853	0.00711545	-	-	3.74427
BRD-K17686226	0.0223461	0.00415621	0.00154513	0.0329213	0.00606957	PIM1	Pim kinase inhibitor	4.12595
BRD-K52688277	0.0223405	0.00637539	0.00576054	0.0136448	0.0189002	-	-	2.555
BRD-K77432048	0.0223405	0.0102298	0.000631984	0.0310515	0.00276765	ATM	ATM kinase inhibitor	1.50249
BRD-K10178088	0.0223374	0.00373114	0.00339803	0.0421163	-0.00457073	-	-	3.43476
BRD-A41916216	0.0223342	0.0146344	0.00292183	0.0201128	0.00699935	-	-	3.25483
BRD-K33606137	0.0223203	0.0115559	-0.00321288	0.0186911	0.0176066	CNR1	Cannabinoid receptor antagonist	4.19642
BRD-K57519495	0.0223172	0.00142815	-0.00754777	0.0382866	0.0124675	-	-	5.51841
BRD-K62153980	0.0223134	-0.00308997	-0.00319671	0.0573703	-0.00645677	-	-	4.57197
BRD-K58534227	0.022305	0.00613529	0.00289925	0.0297625	0.00581302	-	-	3.10682
BRD-K46965430	0.0223026	0.00461748	-0.00566055	0.0420157	0.00363258	-	-	4.05891
BRD-K05861053	0.0223024	0.0101386	-0.00430906	0.0371808	0.00159443	ADORA1	Adenosine receptor antagonist	3.7646
BRD-K35491869	0.0222985	-0.00062083	0.00429318	0.0335951	0.00732952	-	-
BRD-K51140856	0.0222958	-0.00411678	-0.00096767	0.0388921	0.010784	-	-	3.27898
BRD-K63832750	0.0222929	0.00710845	0.00558072	0.0317592	0.000137304	SLC6A1	GAT inhibitor	4.54762
BRD-K87550320	0.0222902	0.00918727	-0.00301924	0.0320159	0.00639649	-	-	3.10536
BRD-K62771975	0.0222809	-0.00480138	0.00149807	0.0461431	0.00172204
BRD-K80362711	0.0222789	0.00379142	0.00263174	0.0349285	0.00320614
BRD-K27998900	0.0222745	0.0047189	0.000211396	0.0344807	0.00513795	-	-	4.97208
BRD-K06804050	0.0222654	0.00336562	0.0020419	0.0323717	0.00675165	-	-
BRD-K78097639	0.0222647	0.00314123	0.00336112	0.0391651	-0.00113794	-	-	4.38034
BRD-K01568615	0.0222593	-0.00330684	0.00356208	0.036346	0.00791731	-	-	3.23258
BRD-K07888196	0.0222576	0.0128489	-0.00177701	0.0236685	0.00977475	-	-	3.69185
BRD-K89471250	0.0222568	0.0126621	0.00313633	0.0209313	0.00778391	-	-	4.44793
phenserine	0.0222557	0.000714131	0.00104914	0.0334996	0.00924849	-	-	2.72734
BRD-K13835847	0.0222538	0.00139084	0.00262164	0.0330787	0.00741642	-	-	7.65452
BRD-K35942122	0.0222527	0.0099577	0.0028814	0.0246674	0.00699895	-	-	2.90508
zoxazolamine	0.0222478	0.0141663	-0.00323166	0.0375179	-0.00395685	-	-	3.52369
BRD-K89486464	0.0222476	0.00702991	-0.00267857	0.0401119	3.19278e-05	-	-	3.58122
BRD-K91016007	0.0222448	0.0182624	-0.00357524	0.037966	-0.00816359	-	-	5.90658
BRD-K17885598	0.0222406	-0.00539073	0.00115775	0.0384036	0.0103106	-	-	3.39681
BRD-K16689648	0.0222273	0.00657083	0.00423936	0.0354687	-0.00182422	-	-	6.07818
BRD-K54391669	0.0222265	0.0056599	0.00235105	0.0282636	0.0081784	-	-	2.68213
BRD-K76084102	0.022224	-0.00341849	-0.00597751	0.0516485	0.00219561	-	-	4.07982
BRD-K93176491	0.0222232	0.00561186	0.00153024	0.0346052	0.00269901	-	-	7.53451
flurofamide	0.0222193	0.00546047	0.00411324	0.0374762	-0.00261135	-	-
BRD-K36884445	0.0222131	0.00913751	-0.00169867	0.0330093	0.00397809	-	-	3.14254
BRD-K12493093	0.0222126	0.00492818	0.00343892	0.0368565	-0.00079842	-	-	3.37282
BRD-K45713168	0.0222124	0.00959366	-0.00770149	0.0461888	-0.0036562	-	-	4.60691
BRD-K24383920	0.0222104	0.00266071	0.000358781	0.0375791	0.00382214	-	-	2.77355
BRD-K69425327	0.0222084	-0.0005574	-0.00440318	0.0466528	0.00272458	-	-	5.6806
rosiglitazone	0.0222057	0.00055501	0.00384797	0.0367557	0.00325276	-	-	8.18158
IWP-2	0.0222001	0.0129071	0.00295208	0.0153036	0.0132375	-	-	5.86349
BRD-K57579117	0.0222001	0.000821229	0.00429283	0.0406239	-0.00133787	-	-	4.05653
BRD-K50580743	0.0221959	0.0053422	-0.00357592	0.0314035	0.011222	-	-	3.63587
BRD-K44890352	0.022183	0.00738455	0.00740336	0.0200833	0.00949473	-	-	5.63785
BRD-K22518694	0.022173	0.00391111	0.00787943	0.0229873	0.00956824	-	-	3.67543
BRD-K37506332	0.0221727	0.0103972	0.00583944	0.0186797	0.00942887	-	-	3.78939
BRD-K62450654	0.0221672	0.00146363	0.000885557	0.0343571	0.00762805	-	-	1.81565
BRD-K01497006	0.0221647	0.00238022	-0.00375098	0.0322786	0.0134216	-	-	5.94715
BRD-K13085116	0.0221584	0.00416517	0.00628903	0.0279969	0.00586571	-	-
BRD-K09796735	0.0221387	0.00880918	0.0018457	0.0344015	-0.000779088	-	-	1.99963
BRD-K10847374	0.022126	0.0101983	-0.00077174	0.030217	0.00460844	-	-	3.56222
BRD-K14268329	0.0221216	0.00261567	0.00648307	0.0296735	0.00547095
BRD-K87166736	0.0221162	0.00358982	-0.003378	0.0408694	0.0031512	-	-	3.82157
BRD-K26792953	0.0221088	0.005366	0.00345132	0.022732	0.0126682	-	-
BRD-K88541752	0.0221059	-0.000925115	-0.00774269	0.0476332	0.00524641	-	-	3.87325
BRD-K76087207	0.0221026	0.00789976	-0.0036317	0.0386957	0.00124142	-	-	3.9059
BRD-K64560329	0.0221008	0.00249963	0.00121775	0.033197	0.00728719	-	-	2.77005
BRD-K81249836	0.0220991	-0.00152961	0.00127479	0.041949	0.00250398	-	-
nepafenac	0.0220984	-0.00398179	-0.000647278	0.0391928	0.00963305	-	-	3.31426
BRD-K86086755	0.0220867	0.014267	0.005677	0.0229611	0.00126832	-	-	1.53391
BRD-K04108962	0.0220831	0.00394664	0.00402211	0.0326945	0.00350284	-	-
BRD-K67628477	0.0220748	-0.00442197	0.00127364	0.0440927	0.00320526	-	-
BRD-K03028122	0.0220737	0.00989947	0.000606648	0.0265953	0.00704602	-	-	4.5098
BRD-K35828963	0.022072	0.0089299	0.00101346	0.0281815	0.00601908
BRD-K02334683	0.0220709	0.0046342	0.00514714	0.0164566	0.0179038	-	-	3.5796
BRD-K96615474	0.02207	0.00417451	0.00535603	0.0263141	0.00829542	-	-	5.18781
BRD-K81757081	0.0220654	0.0012845	0.00199831	0.0269652	0.0138827	-	-	4.80166
BRD-K91952416	0.0220548	0.00269455	0.0039139	0.0242398	0.0132613	-	-
BRD-K05940224	0.0220534	0.00237911	0.00219916	0.0370963	0.00243222	-	-	5.16596
BRD-K03154735	0.0220512	0.00908735	-0.00252249	0.0370283	0.00050923
halofantrine	0.0220472	-0.0012104	-0.000981701	0.0219129	0.0243736	-	-	4.02372
RAN-02	0.0220449	0.0155118	-0.000667221	0.0288264	0.000418751	-	-	3.46948
pyrrolidine-dithiocarbamate	0.022031	0.00464274	0.00243506	0.0341569	0.00282733	-	-	4.84176
BRD-K59518944	0.0220183	0.00107301	0.00209824	0.0367421	0.00412318	-	-	3.78788
BRD-K03088187	0.0220099	0.00511466	0.00374337	0.0291646	0.00599712	-	-	2.92131
lavendustin-c	0.0220025	-0.00142384	0.0050259	0.0331767	0.00722625	-	-
BRD-K47887272	0.0220014	0.00713579	0.00061361	0.0352469	0.00100638	-	-	3.15402
BRD-K39705203	0.021997	0.00752296	0.00462938	0.0295706	0.00227105	-	-	4.16551
BRD-K61033289	0.0219878	0.00209687	0.000989385	0.0360395	0.00484989	-	-	3.70387
BRD-K89806367	0.0219658	0.00739257	-0.0025585	0.0261391	0.0129585	-	-
silibinin	0.021963	0.00522345	-0.000976858	0.0378143	0.00186513	-	-	5.5521
BRD-K53783288	0.0219603	-0.000949754	0.000992975	0.0262001	0.0176773	-	-	2.6007
BRD-K49656278	0.0219597	0.00203844	0.00508079	0.0275859	0.0092142	-	-	3.8433
BRD-K15259307	0.021957	0.0005113	0.00298036	0.0349292	0.0054931	-	-	3.1782
BRD-K27853494	0.0219547	0.0124234	0.00711448	0.011688	0.0126836	-	-	2.45723
BRD-K57650037	0.0219522	0.00275819	0.0050791	0.0329137	0.00315349	HTR1B, HTR1A	Adrenergic receptor antagonist, Serotonin receptor antagonist	3.47227
BRD-K62957665	0.0219497	0.0052144	0.00292336	0.0135674	0.0221942	-	-	2.66191
BRD-K23856550	0.0219449	0.0115518	0.00222147	0.0282284	0.0018881	-	-	2.9352
sparfosic-acid	0.0219403	0.0066185	0.00290507	0.029052	0.00530494	-	-	2.00303
BRD-K24133768	0.021937	0.00982764	0.00208752	0.032963	-0.00100409	-	-	4.16114
BRD-K84909597	0.021933	-0.00425798	-0.0036076	0.049411	0.00232043	-	-	4.54426
BRD-K37959950	0.0219291	0.00336185	0.0049092	0.0275794	0.00800764	-	-	3.7022
BRD-A09243694	0.0219109	0.001218	0.00145069	0.0372049	0.00394824	-	-	3.45359
URB-597	0.0219089	0.0167669	0.000586735	0.0209199	0.00554411	-	-	6.87447
CHIR-99021	0.0219013	0.00722647	-0.00098899	0.0458324	-0.00826721	-	-
BRD-K87840555	0.0218982	0.0109293	-0.0015071	0.0286568	0.00571749	-	-	1.84514
BRD-K74107343	0.0218956	0.00235939	0.00388028	0.0344811	0.00307036	-	-	3.37382
ornidazole	0.0218906	-0.00117764	0.00261989	0.0392469	0.00309211	-	-	3.48325
BRD-K64738596	0.0218881	0.00958919	0.00148271	0.0321715	0.00053271	-	-	3.30306
BRD-K40776502	0.0218818	0.00859188	-0.0032369	0.0423732	-0.00396457	GRIN2B, GRIN2A, GRIN1	Glutamate receptor antagonist	7.4403
BRD-K26423054	0.0218811	0.0122891	-0.00474635	0.0307135	0.00550588	-	-	2.30493
BRD-K47504528	0.0218732	0.00460755	0.0027898	0.0385236	-0.00217451	-	-	4.13392
BRD-K26954478	0.0218587	0.00889917	0.000692964	0.0298745	0.00425083	-	-	2.96113
BRD-K43610632	0.0218582	0.00144798	0.00468106	0.0392877	-0.00170039	-	-	6.89283
BRD-K19264579	0.0218478	0.00975202	-0.00384534	0.0259006	0.0118884	NR3C1	Glucocorticoid receptor agonist	3.22191
BRD-K05113171	0.021844	0.00411672	-0.000644082	0.0327699	0.00744543	-	-	3.16618
BRD-K63458711	0.0218402	0.0102094	0.00228109	0.035301	-0.00411109	-	-	3.92531
BRD-K66877406	0.0218388	-0.000229082	0.00400916	0.0402535	-0.000355977	-	-	3.56133
BRD-K41709602	0.0218381	0.00354655	0.00759401	0.0335698	-0.00103409	-	-	2.52176
BRD-A96537953	0.0218351	0.0071849	-0.00349875	0.0314187	0.00856533	-	-	2.78076
BRD-K77983109	0.0218335	0.0104299	-0.00156306	0.0246298	0.0101705	-	-	4.66259
BRD-K23075656	0.0218313	0.00322583	0.00955992	0.0317178	-0.00084092	-	-	3.26125
BRD-K35780971	0.0218308	0.00615506	0.00709907	0.0236255	0.00678199	-	-
BRD-K75894982	0.0218291	0.00617392	0.00807874	0.0219075	0.0074981	-	-
BRD-K61929092	0.0218212	0.00322459	0.001683	0.0352582	0.00347652	-	-	5.35298
BRD-K97116995	0.0218186	0.00204065	0.000581336	0.0297954	0.0112198	-	-
leucodin	0.0218124	0.00311442	-0.0046509	0.0450348	0.000126541	ESR2, ESR1	Estrogen receptor antagonist	4.69052
BRD-K29474997	0.0218101	0.00858144	0.00367757	0.0256783	0.00568292	-	-	4.35103
BRD-K72519622	0.0217979	0.00961445	0.00160851	0.0229133	0.00945956	-	-	3.12799
BRD-K22384978	0.0217927	0.00235026	-0.00173467	0.0467374	-0.00376753	-	-	6.03402
BRD-K73227372	0.021787	0.00497325	0.00030539	0.0365386	0.00175681	-	-	3.35831
BRD-K74189021	0.0217754	0.00605594	-0.000443609	0.0447718	-0.00683334	-	-	2.85085
BRD-K60862683	0.0217745	0.0104567	-0.0022687	0.0289816	0.00637949	-	-	3.79938
ischemin	0.0217704	0.0098646	-0.00117192	0.0333652	0.0014829	-	-	3.2279
BRD-K50598383	0.0217681	0.00121806	0.00930068	0.0220738	0.0109436
metolazone	0.0217609	0.0101982	0.00160064	0.0327837	-0.00106068
BRD-K57969360	0.0217572	0.00615902	0.00242762	0.0360775	-0.00114979	-	-	3.89529
BRD-K41440211	0.0217503	0.000409062	-0.000695228	0.0449365	-0.0011498	-	-	3.35074
BRD-A55521341	0.0217332	-0.000614803	0.00405278	0.0372133	0.00281517	-	-	3.44829
BRD-K60772078	0.0217284	0.00738579	-0.00506733	0.0424333	-0.00129487	-	-
BRD-K93296644	0.0217271	-0.00414541	0.000883713	0.0504789	-0.00376304	KDM1A, MAOA, MAOB	Monoamine oxidase inhibitor	7.68428
BRD-K61793536	0.0217206	0.00132478	-0.000106316	0.0473302	-0.00510752	-	-	3.06167
BRD-K44238634	0.0217163	0.00589934	-0.00292496	0.0467025	-0.0062443	-	-	3.4582
BRD-K28573311	0.0217133	0.0108322	0.00136924	0.0332603	-0.00203512	-	-	3.30721
BRD-K98723391	0.021708	0.0108609	0.0024198	0.0178225	0.0123129	-	-	4.88787
BRD-K83336892	0.0217007	0.00434138	0.000210487	0.0356584	0.0031912	-	-
BRD-K61651560	0.0216894	0.00598656	0.00011015	0.0270916	0.0101905	-	-	3.56159
BRD-K21838437	0.0216868	0.00576356	0.002904	0.0244927	0.0102134	-	-	3.63595
ramelteon	0.0216738	-0.00662416	0.00521183	0.0354694	0.00929061	-	-	2.80569
CS-917	0.0216723	0.00141327	0.000159145	0.0453547	-0.00358247	-	-	7.023
epibatidine	0.0216568	-0.000872407	-0.00234587	0.0475545	-0.00102275	-	-	2.07554
BRD-K88388723	0.0216567	0.011762	-0.00448369	0.0325399	0.00349526	-	-	5.62769
BRD-K68826049	0.0216563	0.00480722	0.000150059	0.0269215	0.0114337	-	-	2.56912
raltegravir	0.021649	0.00642901	0.00521073	0.022189	0.00946929	-	-	5.15703
BRD-K17482709	0.0216393	0.00628178	0.00349494	0.0261772	0.00732481	-	-
BRD-K44548010	0.0216385	0.00610131	0.00125972	0.0288698	0.00704611	-	-
BRD-K96646082	0.0216385	0.00944576	0.00171297	0.027308	0.00481017	-	-	3.21743
BRD-K03489727	0.0216351	0.00926172	0.00415942	0.0168783	0.0129707	-	-
BRD-K63420290	0.0216337	0.00499674	0.00273516	0.0302317	0.00530377	-	-	3.51427
BRD-K67887361	0.021633	0.00639051	0.00229584	0.0346377	-5.80164e-05	-	-	3.04939
alfaxalone	0.0216324	0.00648791	0.00119489	0.0318125	0.00376938	-	-	3.8168
BRD-K32127177	0.0216261	0.00894236	0.0027401	0.0263683	0.00520152	ADORA2B, PDE3A, PDE4B, PDE4A, ADORA2A, ADORA1, ADORA3	Adenosine receptor antagonist	4.0965
terreic-acid	0.0216216	0.00500702	-0.00121515	0.0392292	0.000222088	-	-	4.60691
BRD-K20024170	0.0216186	0.00669806	0.00686663	0.0226805	0.0069921	CYP19A1, AR	Sterol demethylase inhibitor	3.8002
BRD-K27982554	0.021615	0.00796488	0.00337911	0.0310691	0.00081704	-	-	4.21994
BRD-K90256762	0.0216132	0.000411462	-0.000564744	0.0363273	0.0070523	-	-	3.45454
BRD-K73680494	0.0216107	0.00128623	0.00713611	0.0286911	0.00610801	-	-	4.50514
BRD-K38557431	0.0216055	0.00786579	-0.00030317	0.0282101	0.00743828	SLC6A2, KCNJ10, SLC6A4	Tricyclic antidepressant	9.78957
BRD-K51041684	0.0216043	0.00606244	0.00382183	0.0263329	0.00699149	-	-	3.53131
BRD-K32380790	0.0215952	0.00210879	-0.0027577	0.0338638	0.00997556	-	-
hydroxyamphetamine	0.0215942	0.00764332	0.00062983	0.0205541	0.0143612	-	-	2.24686
BRD-K19225848	0.0215903	0.00399715	-0.00146084	0.0278639	0.0127803	-	-	3.54183
BRD-K59239976	0.021589	0.0088874	2.4e-07	0.0202574	0.0140331	-	-	4.80954
BRD-K39936803	0.021585	-0.000999078	0.000701702	0.0381133	0.00535404
BRD-K27997230	0.0215755	-0.00149082	0.00424561	0.0402825	0.00011364	-	-	4.11599
sildenafil	0.0215697	0.00304343	0.00411624	0.0259932	0.00998643	-	-	4.64038
BRD-K65373229	0.0215628	0.00169128	0.00823108	0.0333947	-0.000191568	-	-	5.20954
BRD-K65054381	0.0215615	0.00341288	0.00129521	0.027069	0.011346	-	-	2.64878
BRD-K48019220	0.021559	0.00610448	0.00365844	0.0270452	0.00630978	-	-	3.08384
BRD-K99807388	0.0215564	0.00020741	0.00089916	0.0322181	0.00978801	-	-	2.69326
BRD-K84679731	0.0215412	0.00422294	0.00514472	0.0288697	0.00484499	-	-	3.00793
BRD-K02280251	0.0215382	-0.00138274	0.00396073	0.0327254	0.00777308	-	-	2.16969
BRD-K53912655	0.021537	-0.00120774	0.00204391	0.0364459	0.00579194	-	-
ryanodine	0.0215172	0.01193	-0.00227524	0.0335469	-0.000167129	-	-	1.56106
BRD-K40471863	0.0215143	5.5109e-05	0.00648233	0.0254417	0.0110495	-	-	3.37069
BRD-K30943140	0.0215081	0.00442798	0.0124632	0.016799	0.00932595	-	-
SA-246522	0.0215071	0.00649701	0.00168566	0.0346842	0.000147221	-	-	2.7715
BRD-K73149920	0.0215058	0.0103865	0.00313393	0.0294713	1.988e-05	-	-	1.20712
BRD-K79494396	0.0215017	0.00859812	0.00161293	0.0243322	0.00846026	-	-	3.68031
BRD-A85231803	0.0214998	-0.00079804	0.0001952	0.0353732	0.00822933	-	-	7.92956
MW-A1-18	0.0214882	0.00332589	0.00434241	0.0482126	-0.0129045	-	-	2.82894
TCPOBOP	0.021486	-0.00135443	0.00536417	0.0349283	0.00403393	-	-	3.28609
BRD-K36171309	0.021482	0.0100031	-0.00165502	0.0313975	0.00321833	-	-	4.07064
BRD-K64347765	0.0214807	0.0082382	0.00296704	0.0241579	0.00759826	-	-	1.79778
BRD-K02969269	0.0214772	0.0159524	-0.00372018	0.0275508	0.00317139	-	-	2.31318
isosilybin-b	0.0214574	0.0050832	0.00158847	0.0282193	0.00802382	-	-	3.40855
BRD-K49745983	0.0214544	-0.00371943	0.00726148	0.0298425	0.00952427	-	-	6.6695
BRD-K77537540	0.021443	-0.000846934	0.00209803	0.038474	0.00316092	-	-	3.89743
BRD-K72700227	0.0214318	0.00823527	0.0112973	0.0219275	0.00140346	ADRA2A, GABRA1, ADRA1D	Adrenergic receptor antagonist, Serotonin receptor antagonist, GABA receptor antagonist	5.30208
BRD-K06733952	0.0214315	-0.000744113	0.011776	0.0191251	0.0127061	-	-	3.27769
BRD-K14813771	0.0214299	0.00324506	0.00473796	0.0286205	0.00625635	-	-	2.9831
BRD-K50689779	0.0214272	0.0124636	-0.0028249	0.0284928	0.00472293
BRD-K57879743	0.0214268	0.00262787	0.00896607	0.0191905	0.0120691	-	-	4.44696
BRD-K64567246	0.0214217	-0.00055014	0.00203152	0.0357301	0.00563189	-	-	3.75192
BRD-K22308901	0.0214193	0.00906259	0.00516453	0.0196204	0.00899117	-	-
BRD-K08521815	0.0214177	0.0056912	0.00604941	0.02838	0.00271472	-	-	2.39006
BRD-K02516751	0.0214086	0.0093424	-0.00235101	0.0292454	0.00658039	-	-	3.85588
BRD-K31987278	0.0214084	0.00849978	0.00283505	0.0247237	0.00675833	MTOR, EGFR	EGFR inhibitor	5.01716
BRD-K28753508	0.0214027	0.00381493	0.00247765	0.0241154	0.0123974	-	-	3.67951
BRD-K12099407	0.0213994	0.00206985	0.00246897	0.0171347	0.0211254	-	-	4.59821
BRD-K71611609	0.0213918	0.00400031	0.00947032	0.0235068	0.00580606	-	-	3.60772
BRD-K76336129	0.0213848	0.0119449	-0.00261041	0.0189932	0.0144418	-	-	3.5796
BRD-K19925255	0.0213843	0.00560761	0.00678503	0.0206941	0.00968179	-	-	6.67436
BRD-K84238725	0.0213841	0.000484999	0.00952296	0.0291609	0.00359936	-	-
BRD-K47802551	0.0213716	0.0081455	-0.00176718	0.0330111	0.00335376	-	-	5.90857
BRD-K06318195	0.0213712	0.00256865	0.00438414	0.032129	0.00366073	-	-	3.51768
BRD-K76571344	0.0213689	0.00451222	-0.00211931	0.039376	0.000968833	-	-	6.50546
BX-912	0.0213677	0.0118274	-0.0024562	0.0412997	-0.0079354	-	-
BRD-K21416096	0.0213659	0.00611561	0.00312684	0.0276375	0.00585172	-	-	2.06028
BRD-K84687999	0.0213623	0.00238487	0.00272767	0.0323963	0.00521568	-	-	3.59183
BRD-K60895802	0.0213621	0.00752949	0.00228321	0.0224455	0.0104661
BRD-K79600112	0.0213619	0.0047306	0.00247716	0.0223091	0.0132071	-	-
BRD-K06208179	0.0213549	0.010096	0.00117449	0.0268974	0.00454193	-	-	5.10499
BRD-K66841501	0.0213496	0.00172255	0.00137055	0.037462	0.00214415	-	-	3.46376
BRD-K92524823	0.0213489	0.00260985	0.00175527	0.0366097	0.00172305	-	-	3.27749
BRD-K72356321	0.0213438	-0.00032542	-0.00395491	0.0403941	0.00657375	-	-	1.71899
BRD-K73839552	0.0213387	0.00609243	0.00772746	0.017897	0.0109604	-	-	2.86012
BRD-K04275703	0.0213355	0.00224151	-0.00011542	0.0312389	0.00930605	-	-	2.69933
diphenyleneiodonium	0.0213355	0.00464396	-0.00429959	0.0415696	0.000757029	-	-	7.02953
BRD-K88000297	0.0213317	0.00346553	0.00257844	0.0284071	0.00821228	-	-	3.42152
BRD-K05329107	0.021326	0.00821809	-0.00256292	0.025332	0.0116648	-	-	3.12724
BRD-K58118393	0.0213237	0.00358308	0.00274754	0.0148831	0.0214336
BRD-K36029679	0.0213234	0.00577737	-0.000147582	0.039714	-0.00269695	-	-	6.85936
BRD-K34026318	0.0213196	0.00906675	0.00147255	0.0276267	0.0044732	-	-
BRD-K22673215	0.0213164	0.00980011	-0.00453187	0.0467259	-0.00936137	-	-	3.75868
BRD-K57894545	0.0213136	0.0033956	-0.00095097	0.0300677	0.0101148	-	-	3.45183
BRD-K22045035	0.0213117	0.00510587	0.00517484	0.0228564	0.00948639	CDH2	Cadherin antagonist	1.33898
nutlin-3	0.0213097	0.00598942	0.000596139	0.0328133	0.00322049	-	-	8.25386
BRD-K27449529	0.0213027	0.0103124	0.00407467	0.0294844	-0.00126598	-	-
BRD-K12067499	0.021296	0.00157923	-0.00102665	0.0392653	0.00277417	-	-	6.4701
BRD-K70860307	0.0212917	-0.00407188	0.0022333	0.0263421	0.0180799	-	-
BRD-K21753319	0.0212756	0.0107298	0.00907738	0.0201105	0.00263345	-	-	3.29135
BRD-K47456901	0.0212736	-3.76547e-05	0.00207666	0.0405151	-6.8581e-06	-	-	3.38016
BRD-K88504000	0.021273	0.00854113	-0.00271709	0.0263637	0.0103582	-	-	3.79518
BRD-A47798787	0.0212645	-0.00068752	0.00172401	0.033803	0.00768949	-	-
BRD-K65611481	0.0212641	0.009166	0.00658046	0.0263937	0.000388065	-	-	4.16707
BRD-K13109628	0.0212563	0.00678708	0.00302386	0.0262156	0.00648608	-	-	3.71033
darusentan	0.0212514	0.00869271	-0.00060272	0.0294232	0.00498963	DRD3, DRD2, HTR2A	Dopamine receptor antagonist	4.44525
BRD-K18346873	0.0212513	-0.00055148	0.00355038	0.0424453	-0.00294158	IMPDH1, IMPDH2	IMPDH inhibitor	1.21418
BRD-K82935485	0.0212469	-0.0100081	0.000931403	0.0451991	0.00637136	-	-	3.45699
BRD-K06148621	0.0212444	0.00769978	0.00630712	0.0166999	0.011782	-	-	2.7556
BRD-K62990480	0.0212441	0.000491254	0.000869213	0.0309505	0.0101772	-	-	1.30511
BRD-K91876603	0.0212418	0.0061628	0.00150646	0.025624	0.00919042	-	-	4.2191
hemado	0.0212414	-1.74138e-05	-0.00477085	0.0358697	0.0114013	-	-	4.44906
BRD-K82071478	0.0212411	0.00495511	-0.00452158	0.0390618	0.00298688	-	-	3.08506
BRD-K49103797	0.0212397	0.00899069	-0.00132145	0.0145353	0.0202749	-	-	3.55808
BRD-K12342133	0.0212353	-0.00821137	0.00993731	0.0384918	0.00225284	-	-	3.29917
BRD-K44139185	0.0212286	0.0170158	-0.00308478	0.0243636	0.00416254	-	-	2.87669
BRD-K95007662	0.0212256	0.00570981	-0.00229067	0.0365678	0.0024642	-	-
SA-94315	0.0212138	0.00537034	-0.00354913	0.0474495	-0.00684318	-	-	3.64032
BRD-K64326023	0.0211987	0.00738732	0.00348459	0.0372192	-0.0056937	-	-	4.58786
BRD-A55609290	0.0211966	0.0148605	0.00101838	0.0269113	-0.000396941	-	-
BRD-K42536980	0.0211942	0.01045	0.00922931	0.0109638	0.0117452	CCKAR, CCKBR	CCK receptor antagonist	4.16192
BRD-K98889734	0.0211881	0.00090729	-0.00371058	0.038109	0.00707042
BRD-K05118964	0.0211867	0.00015722	0.00427483	0.0379043	3.7e-05	-	-	3.74261
BRD-K20028734	0.0211826	0.00691842	0.00365888	0.0320863	-0.00029845	-	-	3.43004
propofol	0.0211788	-0.00447904	-0.00424802	0.0543373	-0.00325266	-	-	2.19494
carbendazim	0.021178	-0.0024607	0.00268281	0.0498698	-0.00773595	-	-
BRD-K47508820	0.0211764	0.0078843	0.00049748	0.0201085	0.0138625	-	-	3.02517
BRD-K55875111	0.0211754	0.00560843	0.00377905	0.0219162	0.0110471	-	-
BRD-K71142328	0.0211744	0.00243145	0.00348054	0.0354473	0.000989434	-	-	3.14138
BRD-K52197325	0.0211744	-0.00578462	0.0124382	0.0395168	-0.00382166	-	-	3.14963
BRD-K33603918	0.0211737	-0.00249121	-0.00404338	0.0412178	0.00766416	-	-	3.43275
nilvadipine	0.021173	-0.00197608	-0.00134554	0.0359161	0.00975152	-	-	3.45468
BRD-A61864215	0.0211697	0.00122998	0.00652815	0.0280595	0.00652163	-	-
BRD-K26231789	0.0211695	0.0190571	-0.0029515	0.0248071	0.00142616	-	-	3.72571
BRD-K91576495	0.021168	0.00951627	-0.00406663	0.0319526	0.00493365	-	-	3.1237
BRD-K29111485	0.0211677	0.00546846	-0.0025663	0.0322863	0.00714701
BRD-K09304381	0.0211665	0.00450507	-0.00183806	0.0358961	0.00376987	-	-	4.03628
BRD-K27824357	0.0211643	0.00194442	0.0066305	0.0387974	-0.00504373
BRD-K25199508	0.0211636	-0.0006403	0.00366178	0.0409646	-0.0016589	-	-	3.16121
BRD-K64939364	0.0211634	0.00514332	0.00737776	0.0222293	0.00757652	-	-	3.36094
BRD-K76985713	0.0211615	0.00131262	0.00714484	0.0274938	0.00637185	-	-	3.63556
BRD-K09407750	0.0211605	0.00986599	0.00729797	0.0171131	0.00804387	-	-	3.12724
BRD-K61596998	0.0211542	0.00304997	0.000315331	0.0412966	-0.00235347	-	-	1.34997
BRD-K91469267	0.0211492	0.0126913	0.00035982	0.019884	0.00936328	-	-	4.99946
BRD-K77965546	0.0211489	0.0046368	0.00120405	0.0322656	0.00419138	-	-	2.85781
hymecromone	0.0211356	-0.000997398	-0.00328088	0.0562812	-0.00973174	-	-	3.22902
T-0156	0.02113	0.00553945	-0.000572939	0.0384903	-0.00119685	-	-
BRD-K93519076	0.0211298	0.00844517	-0.00055468	0.0214611	0.012908	-	-
BRD-K73114074	0.0211238	0.00887313	0.00378955	0.0276324	0.0019525	-	-	3.36137
BRD-K35462787	0.0211236	0.00166485	0.0058091	0.0283284	0.0064449	PTGS1	Opioid receptor agonist, Cyclooxygenase inhibitor	3.87478
BRD-K62369921	0.0211218	0.00503048	0.00334044	0.0246214	0.00925131	-	-	3.49675
BRD-K48358706	0.0211195	0.00599912	-0.00198325	0.0271192	0.0111039
BRD-K07484899	0.0211191	3.713e-05	0.00199025	0.0327905	0.00742033	-	-	3.58349
BRD-K28535931	0.0211175	0.0129061	-0.00151622	0.025166	0.00567919	-	-	3.3654
BRD-K27154831	0.0211165	0.00599217	0.00313125	0.025401	0.00770853	-	-	3.04172
BRD-K76257309	0.0211141	0.0150295	0.00438915	0.00924748	0.0135621	-	-
BRD-K44193634	0.0211139	0.00677388	0.00434154	0.0234525	0.00765986	-	-	2.03718
BRD-K05841284	0.0211037	0.00151033	-0.00061365	0.038907	0.00240377	-	-	3.32186
BRD-K49029187	0.0211017	-0.00094719	0.0116027	0.0322385	-0.00069064	-	-	4.18718
BRD-K52139780	0.0211003	0.0042345	0.00084259	0.0254696	0.011654	-	-	2.77459
BRD-K62590938	0.0210977	0.00798315	0.00599215	0.0260982	0.00212187	-	-	4.77072
BRD-K47238978	0.0210864	0.012739	-0.00135825	0.0237604	0.0070317	-	-	2.30493
BRD-K40221630	0.0210852	-0.00159287	0.00321272	0.0296427	0.0109078	-	-	3.22596
BRD-K50280607	0.0210738	0.00782929	0.00386273	0.0330837	-0.00262823	-	-	2.40573
BRD-K90526956	0.0210623	0.0159567	-0.00039602	0.0180839	0.00847999
BRD-K16256442	0.0210618	-0.00186919	-0.00201837	0.0429532	0.00305796	-	-	4.45215
BRD-K86482074	0.0210565	0.00613338	0.00909902	0.0247131	0.0021675	-	-	5.52641
BRD-K93486666	0.0210521	0.00532547	-0.0048017	0.039731	0.00184934
SA-1938219	0.0210516	0.0120461	-0.0054415	0.0310469	0.00445164	-	-
UNC-1215	0.0210425	0.0133424	-0.00158068	0.0316749	-0.00135174
BRD-K35719087	0.0210406	0.000578043	-0.00229037	0.0385812	0.00521245	-	-	3.8081
BRD-K94766424	0.021037	-0.0012033	0.00202811	0.0344745	0.00677475	-	-	4.73542
BRD-A19912945	0.0210339	0.0126788	-0.00322457	0.0288164	0.00379704	GRM5	Glutamate receptor antagonist	4.39834
BRD-K77791851	0.0210283	0.00632738	0.00417311	0.0130644	0.0184918	EHMT2	DNA methyltransferase inhibitor, Histone lysine methyltransferase inhibitor	4.36505
BRD-K67525206	0.0210256	0.00133005	0.0103941	0.0268912	0.00343586	-	-	3.25826
BRD-K14336497	0.0210245	0.0119131	0.0013295	0.0229789	0.00582763	-	-	3.77841
BRD-K18096819	0.0210219	0.00265012	0.000452015	0.035293	0.00364858	SELP	P selectin inhibitor	4.26416
BRD-K89912164	0.0210199	0.00430321	-0.00820489	0.0377737	0.00816777
BRD-K49657628	0.0210104	0.0133119	-0.00644045	0.0326129	0.00253657	-	-	2.52053
BRD-K86682249	0.021009	0.0109793	-0.00148772	0.0337251	-0.00119865	-	-	3.92198
BRD-K76829357	0.0209957	0.00722576	0.00095405	0.024602	0.00920953	-	-	2.98481
BRD-K87849910	0.0209941	0.00394164	0.00865575	0.0200399	0.00935093	-	-	2.98456
BRD-K06174863	0.020983	-0.00060378	0.00448229	0.0393558	-0.00126824	-	-	3.64801
BRD-K09487323	0.0209792	0.00123427	-0.000442745	0.0414013	-0.000234314
BRD-K95983807	0.0209743	0.0119325	0.00184464	0.0278938	0.000277747	-	-	2.35634
vitexin	0.0209675	0.00478753	0.0014028	0.0273852	0.00835942	-	-	2.8273
BRD-K35404971	0.0209658	0.0105221	-0.00478119	0.0373676	-0.00117694	-	-	5.69501
BRD-K76609014	0.0209647	-0.00094479	0.00860032	0.0246454	0.00962845	-	-	3.75188
BRD-K11893906	0.0209611	0.00677212	-0.00259696	0.0323665	0.00538045	-	-
BRD-K27005217	0.0209565	0.0152244	-0.00552609	0.0238309	0.00838381	-	-	2.30739
BRD-K17619118	0.0209559	0.0097447	0.00761801	0.0256671	-0.00111791	-	-
BRD-K30013451	0.0209521	0.00461677	-0.00497946	0.0340752	0.00819166	-	-
BRD-K99859971	0.0209493	-0.00036604	0.0063134	0.0264144	0.00953689	-	-	3.95216
ICI-162846	0.0209491	0.00738371	-0.00126466	0.0368909	-0.00111186	-	-
regadenoson	0.0209482	0.00353096	-0.00105173	0.0338542	0.00556302	-	-	3.1706
BRD-A05823365	0.0209462	-0.00068573	-0.00192614	0.0426715	0.0018327	-	-	4.01051
BRD-K48052985	0.0209403	0.00147902	0.00912477	0.0191134	0.0121634	-	-
BRD-K93130549	0.0209392	0.00763985	-0.0004956	0.0194643	0.0152698	-	-	4.93567
clonazepam	0.020939	-0.00480281	0.00359831	0.0385447	0.00453774	-	-	2.00311
BRD-K39507473	0.0209388	0.000877259	-0.00139114	0.0383723	0.00401931	-	-	0.199399
BRD-K90275731	0.0209328	0.00927811	-0.000987402	0.030905	0.00266998	-	-	2.39282
BRD-K78467731	0.0209327	0.0054042	0.00522594	0.0262609	0.00497447	-	-	4.05765
BRD-K31129604	0.0209319	-0.00721595	0.00130177	0.042724	0.00505398	-	-	3.82536
BRD-K44194212	0.0209275	0.00249337	0.00501996	0.0434185	-0.00907683	-	-	3.5683
BRD-K93996655	0.0209165	0.00447106	-0.00480257	0.0366372	0.00552736	-	-
BRD-K68216590	0.0209155	0.00829353	0.00372551	0.0293385	0.000473391	-	-	3.27832
BRD-K85802361	0.0209073	0.00526475	-0.00107955	0.0306573	0.00697203	-	-	1.32015
BRD-K01463939	0.0209037	0.00022353	0.0044586	0.0332674	0.00385778	-	-	2.17109
BRD-K55282910	0.0209019	0.00303888	0.00214981	0.0370205	-0.000405464	-	-	2.66839
BRD-K27084624	0.0208959	0.0114472	0.00146631	0.0270364	0.0018418	-	-
BRD-K90445273	0.020889	0.00897396	0.00278508	0.0285224	0.00149656	-	-
ofloxacin	0.0208839	0.0049158	0.00478283	0.0314214	0.000647759	-	-	3.27926
BRD-K42478399	0.0208833	0.00716917	0.00356927	0.0203479	0.0106802	-	-	3.25831
BRD-K08593711	0.02088	0.0020927	0.00143282	0.0353701	0.00286432	ODC1	Ornithine decarboxylase inhibitor	1.87482
BRD-K28589277	0.0208743	-0.00201398	-0.00261251	0.0436163	0.00275885	-	-	4.07743
BRD-K77004285	0.0208717	0.0125041	0.00369648	0.0162096	0.00933318	-	-
BRD-K18688395	0.0208709	0.00495374	0.00863267	0.0136981	0.0144572	-	-	2.9881
BRD-K21987633	0.0208704	-0.00115552	-0.000491183	0.044826	-0.00143862	-	-	3.12724
MDL-29951	0.0208647	0.00119636	-0.000591624	0.0341762	0.00694851	-	-	6.87447
BRD-K98596482	0.0208641	0.0146501	-0.00336882	0.0283421	0.00210482	-	-	2.94658
pirlindole	0.0208623	0.000906362	0.00186743	0.0372514	0.00169941	-	-
BRD-K63602071	0.0208617	0.00358863	0.00425362	0.0265303	0.00735093	-	-	4.49574
BRD-K11054031	0.0208482	0.00598247	0.00093826	0.0299024	0.00487315	-	-	3.95601
betamethasone-valerate	0.0208447	0.0021365	0.0008624	0.0268744	0.0118161	-	-	3.84147
BRD-K62318087	0.0208379	0.00598948	-0.00334029	0.0365952	0.00243144	-	-	4.24027
BRD-K18237196	0.0208342	0.00635805	-0.00514622	0.0360023	0.00445423	-	-	6.41904
BRD-K72051249	0.0208328	-0.00255689	-0.00394767	0.0484818	-0.000311589	-	-	4.34666
cephalothin	0.0208307	0.0010109	0.00142472	0.0387106	0.00051524	-	-	1.62991
BRD-K44878051	0.0208306	0.0123963	0.0085099	0.029192	-0.00843699	-	-	4.44871
BRD-K60744874	0.0208283	0.00540416	2.163e-05	0.027809	0.00842192	-	-	3.10299
BRD-K97233756	0.0208276	0.0041589	-0.00187373	0.0336811	0.0056889	-	-
BRD-K41310621	0.0208241	0.00492127	0.00774779	0.029161	-0.0001818	-	-	3.34756
epidepride	0.0208193	0.00946802	0.00879946	0.0250174	-0.00164625	-	-	3.10173
talniflumate	0.020817	-0.00153784	-0.000458319	0.0406787	0.00295154	-	-	3.74786
BRD-K81586131	0.0208125	0.00753333	0.00312627	0.0274778	0.00348756	-	-	4.19795
BRD-K92009052	0.0208112	-0.00170869	0.0049178	0.0214288	0.0169844	-	-
BRD-K31460632	0.0208107	0.00571234	0.0029542	0.0319901	0.00096478	-	-	3.54508
BRD-K46949676	0.0207989	0.00623662	0.00160041	0.0261667	0.0075941	-	-	4.53426
BRD-K66909712	0.0207971	0.00686231	-0.00345837	0.0276056	0.0105848	-	-	2.20073
BRD-K48235533	0.0207821	0.00817203	0.00800662	0.0197012	0.00568434	-	-
BRD-K38263412	0.0207814	0.00118029	0.00335538	0.0326235	0.00440363	-	-
BRD-K26694002	0.0207805	-0.00534626	-0.00386921	0.0348436	0.0159329
BRD-K71808107	0.0207772	0.0109991	-0.00148061	0.02568	0.00635587	-	-	3.1761
BRD-K36709933	0.0207766	0.00574485	0.00210011	0.0318722	0.00183607	-	-
BRD-K08760804	0.020775	0.00587949	-0.00322233	0.0369793	0.00191359	-	-	6.24605
BRD-K52001024	0.0207668	0.0125608	-8.394e-05	0.0218836	0.00717314	-	-
BRD-K70924576	0.0207659	0.00728387	-0.00020489	0.0251817	0.00927121	AURKA	Aurora kinase inhibitor	4.08625
BRD-K53549851	0.0207657	0.00821465	-0.00460679	0.0350494	0.00287403	-	-	1.9685
BRD-K96194181	0.0207637	-0.00362725	-0.000725166	0.0443254	0.00155442	-	-	3.00882
BRD-K17375958	0.0207535	-0.00497511	0.0100292	0.0278962	0.00855678	-	-
BRD-K22789789	0.020752	0.00117217	-0.00631362	0.046749	-0.00010358	-	-	3.6957
BRD-K71919612	0.0207505	0.00145118	0.00749402	0.0284544	0.00410129	-	-
4-chlorophenylguanidine	0.0207429	-6.52028e-05	0.00394157	0.034363	0.00324646	-	-
BRD-K18523456	0.0207422	0.00167167	-0.00097568	0.0260867	0.0147016	-	-	1.81271
eprobemide	0.0207404	0.00326191	0.000890066	0.029391	0.00793781	-	-	4.39835
BRD-K16911140	0.0207377	-0.00073409	0.00541445	0.0387847	-0.00198967	-	-	1.74524
BRD-K34710061	0.0207269	0.00471153	0.00200532	0.0206656	0.0140713
ML-204	0.0207265	-0.00224846	-0.000743957	0.0369497	0.00749568	-	-	2.8281
BRD-K11506071	0.0207181	0.00797453	0.00842447	0.00912289	0.0159144	-	-	3.5712
m-3M3FBS	0.0207176	-3.38405e-05	0.00286259	0.044355	-0.00574859	-	-	4.09732
BRD-K59019422	0.0207137	0.00361984	-0.00247994	0.0321777	0.00810979	-	-	3.56395
BRD-K61627029	0.0207106	-0.0071096	0.000766658	0.0328038	0.0149604	-	-
BRD-K48113764	0.0207057	0.00557157	0.00710991	0.0195283	0.00920165	-	-	4.74335
BRD-A98888138	0.0207009	0.00085543	0.00237309	0.0404346	-0.0022613
BRD-A35141262	0.0206983	0.000726601	0.00220323	0.0419412	-0.00347448	-	-	3.60699
BRD-K55742134	0.0206939	0.00917817	0.00017603	0.0189996	0.013034	-	-	2.59915
BRD-K33685212	0.0206938	0.00322798	-0.00154746	0.0280361	0.011671	AHCY	Adenosylhomocysteinase inhibitor	2.4839
BRD-K70210716	0.0206908	0.00145935	-0.00403971	0.0279515	0.0160105	-	-	3.26369
BRD-K59757264	0.0206847	0.0118949	0.00196916	0.0202834	0.00722206	-	-	3.49582
BRD-K46363727	0.0206787	-0.00227558	0.00472762	0.0358644	0.00304106	-	-
BRD-A03668899	0.0206721	0.00323811	0.00254763	0.0369435	-0.00138507	ALK	ALK inhibitor	3.52809
BRD-K27008344	0.0206659	0.00924237	-0.00124796	0.0229768	0.0103607	-	-	6.71247
BRD-K55518911	0.020665	0.00796091	0.0008774	0.021497	0.0109947	-	-	3.25418
BRD-K81522184	0.0206645	-0.00068148	0.00115722	0.0296773	0.0111758	-	-	2.957
voglibose	0.0206632	0.00880569	-0.00434097	0.038536	-0.00167433	-	-	2.96491
BRD-K75260889	0.0206584	0.00109655	0.00391283	0.0278553	0.00845212	-	-	4.03097
BRD-K68512873	0.0206572	0.00732746	-0.00207931	0.0281897	0.00787648	-	-
BRD-K26570871	0.0206557	0.00646804	0.00363225	0.0283389	0.00287215	-	-	4.59835
BRD-A43135847	0.0206483	0.00547129	0.00601436	0.0218679	0.00794312	-	-	2.9645
BRD-A62469171	0.0206387	0.00760016	0.00069312	0.0253937	0.0075903
PIT	0.0206381	0.000501836	0.00233963	0.0185652	0.0198696	-	-	4.54231
BRD-K78015078	0.0206357	0.00291597	-0.00093433	0.0231282	0.0161615	-	-	3.21859
BRD-K47533800	0.0206301	0.0116019	0.00549984	0.0195876	0.0045708	-	-
BRD-K71419092	0.0206274	0.0154283	0.00564129	0.0261061	-0.00592097	-	-	3.66929
BRD-K28008176	0.0206235	0.00526555	0.00392291	0.0207755	0.0112831
BRD-K89440651	0.0206156	0.00842093	-0.00512412	0.0360993	0.00183521	-	-	2.81998
BRD-K65000194	0.020608	0.00785671	0.00420112	0.0292138	-5.55496e-05	-	-	4.24435
BRD-K05519665	0.0206036	-0.00105483	0.000561649	0.0462537	-0.00455324	-	-	2.66819
BRD-K78931693	0.0205917	0.00798078	0.00425954	0.0242495	0.00469354	-	-	3.38532
BRD-K35307739	0.0205832	0.00196644	0.0113544	0.0208292	0.00701631	-	-	3.77235
BRD-K35514965	0.0205831	0.00738055	-0.0039043	0.0358053	0.00188465	-	-	4.25202
BRD-K34898990	0.0205793	0.0032159	0.0037638	0.0327135	0.00146548	-	-	5.9129
BMS-270394	0.0205789	0.00394633	-0.000795309	0.0322602	0.00574647	-	-	3.94495
BRD-K94274196	0.0205757	-0.000687298	0.00109637	0.0365412	0.00420113	NGF, NGFR	NGF binding inhibitor	3.24653
BRD-K16347954	0.0205703	0.0132319	-0.00365345	0.0278016	0.0037605	-	-	2.93332
BRD-K59194147	0.020567	0.00462032	0.00405244	0.0192031	0.0132581	-	-	2.35392
BRD-K16149503	0.0205628	-0.00144978	0.00732716	0.0249588	0.0102895	-	-
BRD-K85779012	0.0205583	0.0079416	0.00130979	0.0355447	-0.0036795	-	-	3.22082
BRD-K20381303	0.0205569	0.0143967	-0.000711706	0.0193395	0.00808929	-	-	3.02654
BRD-K16991828	0.0205559	0.00337401	0.00681797	0.0226264	0.00829354	-	-	2.66735
BRD-K91969329	0.0205526	0.00171124	-0.00069025	0.0367596	0.00332465	-	-	2.11536
BRD-K18621941	0.0205499	0.0128476	0.00061102	0.0180972	0.00954389	-	-	2.49775
BRD-K75100119	0.0205392	0.00472738	0.00335987	0.0232965	0.00969465	-	-	2.36745
ZG-10	0.0205354	0.00791993	-0.00530593	0.0484201	-0.00996335	-	-
BRD-A53850583	0.0205314	0.0103966	-0.00243196	0.0360479	-0.00294985	-	-
BRD-K94633563	0.0205274	0.00475544	-0.0021535	0.0305713	0.00788154	-	-	3.72321
BRD-K55082119	0.0205234	0.00657728	0.000603689	0.0429846	-0.00911889	-	-	2.66232
BRD-A05828965	0.0205224	0.00782838	-0.00485455	0.035853	0.00221795	-	-	2.52581
BRD-K63024248	0.0205111	0.0049939	-0.00175649	0.0236004	0.0141845	-	-
BRD-K63921140	0.0205061	0.000240313	-0.0036007	0.0331239	0.0112486	-	-	4.64487
BRD-K52124788	0.0205039	0.00048577	0.00144573	0.0320755	0.00700076	-	-	4.21936
BRD-K34086616	0.0204982	0.0071851	-0.00791642	0.038471	0.0032566	-	-	7.41532
BRD-K00509345	0.0204964	0.0129269	-0.00091403	0.0282181	0.0007618	-	-	3.50438
BRD-K08266813	0.0204942	0.0107158	-0.00412786	0.0398812	-0.00548061	-	-	3.7904
BRD-K82004089	0.0204926	0.00485878	0.00269797	0.0269813	0.00644721	-	-	3.09754
BRD-K52520268	0.0204837	0.00882199	0.00122602	0.0284473	0.00247208	-	-
BRD-K66866270	0.0204831	0.0110116	-0.00870713	0.0333361	0.0053257	-	-
CO-101244	0.0204821	0.00252777	-0.00729804	0.0381099	0.00762449	-	-	3.25831
BRD-K55806039	0.0204795	0.00370948	-0.00490774	0.0350404	0.00711687	-	-	3.63081
BRD-K04262969	0.0204764	0.00837935	0.0039985	0.0100287	0.0185461	-	-	4.57216
ethoprop	0.0204755	0.0108515	-0.00207282	0.0232488	0.00892341	-	-	4.10743
BRD-K93906979	0.0204744	0.0074182	0.00257016	0.0214984	0.00946211	-	-	4.37024
BRD-K05351800	0.0204712	0.00722711	-0.00584859	0.0245517	0.0150122	-	-
BG-1019	0.0204699	0.00300527	0.00607951	0.0314533	0.000401713	-	-	3.39559
BRD-K93086630	0.0204672	0.00670172	-0.00146151	0.0227867	0.0129075	-	-
ARG-CSC-18	0.0204642	0.00901897	0.00604463	0.0212157	0.00464901	-	-	5.63384
BRD-K55489373	0.0204503	0.00551503	0.00337205	0.0317025	0.00031114
BRD-K96981233	0.0204497	0.0129188	0.00051559	0.0172368	0.0102282	-	-
BRD-K52872067	0.0204432	0.00623709	0.0056453	0.0262544	0.00274956	PLK1	PLK inhibitor, Cell cycle inhibitor	1.94513
BRD-K91277001	0.0204372	0.00833134	0.00279282	0.018311	0.0114394	-	-	3.96846
BRD-K50342369	0.0204348	0.00982714	-0.00586902	0.0384277	-0.00151629	-	-	3.86725
BRD-K08174547	0.0204321	0.0107704	0.00272209	0.018968	0.00840378	-	-	2.87957
fatostatin	0.020424	0.0127917	0.000202435	0.0202832	0.00757063	-	-	3.62107
BRD-K97925203	0.0204228	0.00362197	-0.00337329	0.0331224	0.00747454	-	-	4.46041
BRD-K66187495	0.0204206	0.00231332	-0.00463522	0.0368013	0.0063618	-	-	4.37524
BRD-K02986291	0.0204059	0.0069528	0.00367008	0.025684	0.0045049
BRD-K84613654	0.0204054	0.0152396	0.00062434	0.0123979	0.012549	-	-	6.30661
BRD-K46149455	0.0204047	0.0117744	-0.00194336	0.0216313	0.00934698	-	-	2.29271
BRD-A69110668	0.0204003	0.00288985	0.00687784	0.0245668	0.00646617	-	-	4.15117
BRD-K21936026	0.0203997	-0.0026819	8.633e-05	0.0387993	0.00459574	-	-	2.52834
BRD-K86587289	0.0203955	0.0125157	-0.00074659	0.0234751	0.00554681	-	-	4.59681
BRD-K71216533	0.020394	-0.0014629	0.00776455	0.0415167	-0.00703042	-	-	3.35575
BRD-K50513128	0.0203922	0.00615119	-0.00257236	0.0329064	0.00429928	-	-	3.37069
BRD-K64317740	0.0203887	0.00236056	-0.00264824	0.0406701	0.00039494	-	-	2.93266
BRD-K85955502	0.0203883	0.0111057	0.00664786	0.0145987	0.0084244	-	-	4.2894
BRD-K44756290	0.020383	0.00242221	0.00417322	0.0221976	0.0119729	-	-
BRD-K61432982	0.0203827	0.00357047	0.00016407	0.0267503	0.0102806	-	-	4.27224
BRD-K20039572	0.0203795	0.0071265	-0.00018794	0.0246341	0.00918631	-	-	2.55924
BRD-K71650306	0.0203714	0.0171135	0.000623353	0.0110558	0.01195	-	-	3.40609
TRIM	0.0203696	0.00894576	0.00283217	0.0224542	0.00650699	-	-	3.12724
BRD-K98739056	0.0203649	-0.00442473	0.00232605	0.0363001	0.00652841	-	-	2.87739
famotidine	0.0203623	0.00536947	0.00512043	0.021672	0.00856283	-	-	1.12108
BRD-K40164971	0.0203522	0.00450694	0.00384329	0.0253074	0.00704667	-	-	6.62742
BRD-K54533560	0.0203516	0.00618858	0.00660204	0.0193825	0.00853004	CCL2, CCL7, CCL8	NFKB pathway inhibitor	4.09278
SR-27897	0.0203422	0.00455043	0.00502235	0.0359009	-0.00478917	-	-
BRD-K01464244	0.0203401	0.0089187	0.00355325	0.0288298	-0.000621668	-	-	1.99922
BRD-K76350099	0.0203346	0.0125373	-0.00086091	0.026818	0.0021749	-	-	3.6881
BRD-K14263251	0.0203256	0.00115242	-0.00627602	0.0364878	0.00928706	-	-	2.53969
BRD-K89179622	0.020324	0.00031169	0.00184246	0.0362529	0.00224085	-	-
kinetin-riboside	0.0203231	0.0135408	0.00407404	0.0241822	-0.00115072	-	-	3.92259
flucloxacillin	0.0203203	0.00165334	0.005795	0.0290059	0.0041864	-	-	2.04809
BRD-K53993775	0.0203118	0.015442	-0.00156651	0.0145909	0.0121574	-	-	4.97105
BRD-K03916755	0.0203114	0.00420981	0.00824025	0.0309838	-0.00281112	-	-	2.89171
BRD-K98720112	0.0203084	-0.00138401	0.00322143	0.0250911	0.0136883	-	-	2.77005
BRD-K11911738	0.020306	0.00612894	-0.00318363	0.0413438	-0.00367715	-	-	2.74644
BRD-K84939696	0.0203029	0.00871756	0.00249947	0.0223936	0.00699526	FGFR3, PDGFRB, PDGFRA, LYN, KIT	PDGFR inhibitor, KIT inhibitor, Src inhibitor	3.44976
diphenylpyraline	0.0202983	0.000267671	0.00633499	0.0269369	0.00705698	-	-	3.29184
BRD-K66538269	0.0202949	0.00292545	0.00707342	0.0209331	0.00965793	-	-	4.77982
BRD-K56917655	0.0202943	0.00557226	-0.000785533	0.0300367	0.00576516	-	-	3.25129
BRD-K47724900	0.0202925	0.0075398	0.00633987	0.0155661	0.0111392	-	-	3.0105
BRD-K81415316	0.0202923	0.00715679	0.0089076	0.00556703	0.0189532	-	-	3.90225
BRD-K89288521	0.0202884	0.0135851	-3.62678e-05	0.0255113	0.00151662	-	-	3.84171
BRD-K55316222	0.0202857	0.00347582	0.00230125	0.0170154	0.0177789	-	-
BRD-K55946794	0.0202808	0.00175306	0.00954092	0.031568	-0.00230028	DHODH, IL17A	Dihydroorotate dehydrogenase inhibitor	4.16369
BRD-U01690642	0.0202797	0.00685015	-0.00302813	0.0412968	-0.00455951	-	-	1.73438
BRD-K16796151	0.0202797	-0.000728698	0.00275598	0.0303495	0.00818256	EGFR	EGFR inhibitor	1.73669
thiamine	0.0202789	0.00949165	-0.00246591	0.0380686	-0.00453652	-	-	3.25506
GALR3_GALANIN	0.0202783	0.00922881	-0.00648712	0.0396206	-0.0018056	-	-	4.34934
BRD-K34977825	0.020275	0.0047034	0.00432049	0.024493	0.0070331	CALM2	Calmodulin antagonist	4.84474
BRD-K32078195	0.0202707	0.00225337	0.00467035	0.026064	0.00755367	-	-	3.82739
BRD-K99516890	0.0202706	0.00587223	-0.00053522	0.0301259	0.00507822	-	-	3.55011
BRD-K87959840	0.0202698	0.008754	-0.00305603	0.0312023	0.00363922	-	-	2.88216
BRD-K06518099	0.0202697	0.00504626	0.00302932	0.0270347	0.00542906	-	-	4.8585
BRD-K24578841	0.0202616	-0.00210532	0.00128238	0.0276691	0.0136772	-	-	2.2257
BRD-A20213616	0.0202605	0.0112763	0.00519395	0.0196955	0.00435531	-	-	3.59938
acitretin	0.0202498	0.000598033	-0.00436241	0.0417814	0.00248245	-	-
BRD-A06131576	0.0202469	0.00849228	-0.00194595	0.0397843	-0.0058369	-	-
BRD-K75984692	0.0202468	0.000526645	0.000691432	0.0353125	0.0039631	-	-
BRD-K54049773	0.0202464	0.00494799	0.0100457	0.0243036	0.0011954	-	-
BRD-K85951787	0.0202448	0.0033059	0.00232924	0.02365	0.0112045	TP53	NFKB pathway inhibitor, TP53 activator, Cytokine production inhibitor	6.16256
BRD-K21387011	0.0202373	0.00541727	0.00535167	0.0322516	-0.00254586	-	-
BRD-K04791118	0.0202369	0.00350848	0.00075845	0.0283104	0.00789647	-	-	2.26402
BRD-K91565112	0.0202354	0.00805374	0.0114684	0.0196756	0.00127302	-	-	3.05082
BRD-K30781400	0.0202348	0.00670021	0.00631051	0.025445	0.00201393	-	-	1.70586
BAS-02859604	0.020234	0.00197	0.00222156	0.0345244	0.00175209	-	-	4.09051
clozapine	0.0202216	-0.00330219	-0.00103768	0.0251518	0.0196312	-	-	2.36807
BRD-K07921357	0.0202207	0.00969831	-0.00120406	0.0282176	0.00372967	-	-	3.27952
BRD-K37478894	0.020217	-0.00104417	-0.000443719	0.0437311	-0.00180917	CSNK2A1	11-beta-HSD1 inhibitor	3.69432
BRD-K77320816	0.0202167	0.00872951	-0.00214912	0.0366846	-0.00283156	-	-	1.9217
BRD-K32053117	0.0202153	0.00580991	0.00102446	0.0354872	-0.00189098	-	-	3.56133
BRD-K31805261	0.0202115	-0.00547459	0.00912627	0.0285221	0.00824927	-	-	3.96581
BRD-K54151058	0.0202095	0.00796926	0.00350275	0.0291939	-0.00024691	-	-	2.51283
BRD-K60743396	0.0202091	0.00497598	0.00589739	0.0333387	-0.00379384	-	-	1.42178
BRD-K96408604	0.0201972	0.00567549	-0.00420999	0.0340333	0.00489557	-	-	3.5834
BRD-K24315235	0.0201962	0.00736952	0.00752987	0.0252077	0.000285357	-	-	6.02728
WZ-4002	0.0201955	0.00345618	-0.00395433	0.0291391	0.01175	-	-	3.80473
BRD-K03591925	0.0201905	0.00422309	0.00177314	0.0259627	0.00842209	-	-	3.03169
BRD-K21584435	0.0201875	0.00635716	0.00322891	0.0194792	0.0113097	-	-	3.27769
BRD-K27193300	0.020185	0.00919415	-0.000919712	0.0365532	-0.00445762	-	-	2.64159
BRD-K97824883	0.0201719	0.0133011	-0.00378503	0.0196606	0.0111671	-	-
BRD-K32582260	0.0201712	0.00529778	0.00092468	0.0340392	8.065e-05	-	-	2.38413
LX-1031	0.020166	0.000935531	-0.00488474	0.0339357	0.0103455	-	-	2.83957
indinavir	0.020166	0.0020123	-0.000492272	0.0375704	0.00124153	-	-	2.66592
BRD-K73500518	0.0201587	0.00495851	0.00517948	0.0159986	0.0141807	-	-	3.55261
BRD-K72443777	0.0201585	0.00616212	0.00458352	0.0276765	0.00189499	-	-	2.81059
BRD-K15975627	0.0201576	9.776e-05	0.00423188	0.0362763	-0.00029074	-	-	2.6979
BRD-K86344535	0.0201556	-0.0034214	-0.000452766	0.0398742	0.00431105	-	-	2.95018
BRD-K17553044	0.0201555	0.00150205	0.00324596	0.0434699	-0.00790682	-	-	4.24257
BRD-K53771043	0.0201537	0.0030513	0.00440332	0.0317817	0.00107112	-	-
BRD-K07609594	0.0201435	0.00545814	0.00540623	0.0240246	0.00539808
BRD-K50791983	0.0201434	0.00264415	-0.00159923	0.0391536	8.83605e-05	-	-	3.77062
BRD-K61033092	0.0201426	0.00122579	0.0018628	0.0348796	0.00231695	-	-
BRD-K75625428	0.0201412	0.00777757	0.00321554	0.0238498	0.00543949	-	-	2.34442
BRD-K81277520	0.0201399	-0.00379121	0.00325617	0.0354654	0.00534952	-	-	6.2033
BRD-K72787121	0.0201352	0.00439075	-0.000573619	0.0266411	0.00981207	-	-	3.10548
BRD-K34761198	0.0201285	0.00463655	0.00323958	0.0222474	0.0101333	-	-	3.01792
BRD-K60886324	0.0201272	0.00164091	0.00642269	0.0229892	0.00920162	-	-	4.29154
BRD-K00631971	0.0201272	0.00552069	0.00062045	0.0312745	0.00283865	-	-	3.36453
BRD-K91895574	0.0201261	0.00339581	0.00116749	0.0317204	0.00396858	-	-
BRD-K77291765	0.0201238	0.00429661	-0.0034853	0.0385437	0.000892471	-	-	4.17888
BRD-K60002786	0.0201205	0.00170377	-0.000225403	0.0377962	0.000966498	-	-
BRD-K35046689	0.0201191	0.00157892	-0.00229037	0.0358266	0.00512296	-	-	3.73319
BRD-K19597888	0.0201188	-0.00382779	0.00367288	0.029614	0.0107785	-	-	2.99536
BRD-K71554049	0.0201139	0.013026	0.00209452	0.027801	-0.00269369	-	-
guvacine	0.0201116	0.0040018	0.00465639	0.0383138	-0.00674874	-	-	5.11648
BRD-K88196769	0.0201099	0.00187163	-0.00109225	0.0353026	0.00413774	-	-	3.72114
BRD-A67697194	0.0201093	0.00414366	0.00442377	0.0327225	-0.00107131	-	-	3.5683
BRD-K30022119	0.0201055	0.00897452	0.00263703	0.0187564	0.009843	-	-	3.33554
BRD-K11468634	0.0201041	0.013955	-0.000467754	0.0250154	0.00170547	-	-	3.00074
BRD-K75583553	0.0200886	0.00659928	-0.00019333	0.0199139	0.0138573	-	-	3.18129
rufloxacin	0.0200882	0.000934283	0.00674398	0.0378153	-0.00531721	-	-	4.6498
BRD-K92891227	0.0200844	-0.00058705	0.00170455	0.0247087	0.0143426	-	-	3.31835
propylthiouracil	0.0200795	0.000852604	-0.000521081	0.036389	0.00343856	-	-	4.48124
BRD-K81888673	0.0200741	0.00933584	0.00223166	0.0214495	0.00713124	CHRM5	M5 modulator	4.22699
BRD-K44304623	0.0200673	0.00570838	0.00296094	0.0350489	-0.00358365	-	-	4.56175
fiacitabine	0.0200625	0.0116328	0.000999844	0.0318175	-0.00432513	-	-	3.79106
BRD-K70856965	0.0200599	0.00565688	0.0099464	0.0252672	-0.00075064	-	-	3.21668
BRD-K38796873	0.0200564	0.00182379	0.00598661	0.0334379	-0.00113538	-	-	3.15137
BRD-K21327356	0.0200548	0.0149598	9.15e-05	0.0217163	0.00334216	-	-	3.4348
BRD-K89567872	0.0200547	0.00495426	0.00474976	0.0288536	0.00155176	-	-	3.75377
BRD-M91876180	0.0200516	0.0060616	0.00116096	0.0217688	0.0111118	-	-	4.73542
BRD-K23062575	0.0200458	0.00344416	-0.00366151	0.0351552	0.00515365	-	-
BRD-K06724886	0.0200446	0.00107151	-0.00093247	0.0393202	0.00062988	-	-	5.21021
BRD-K24752397	0.0200394	-0.00194487	0.00457347	0.0300323	0.00741797	-	-	3.37502
BRD-K49345010	0.0200387	0.0112995	0.00135462	0.0196102	0.00781298	-	-	2.66839
BRD-A29578214	0.0200337	0.00849899	-0.00268113	0.0256201	0.00862936	-	-	3.51464
PSB-069	0.0200223	0.0042905	0.00345847	0.0225132	0.0097824	-	-
BRD-A46566149	0.0200103	0.00762381	0.0107372	0.0169714	0.00468808	-	-	3.21616
hydroxytoluic-acid	0.0200022	0.00568163	0.0119429	0.0182956	0.00408428	-	-	3.62738
BRD-K62170825	0.0200015	0.00997806	0.0036208	0.0174996	0.00890463	EGFR	EGFR inhibitor	3.71945
BRD-K96505704	0.0199989	0.00732756	0.00068217	0.0240643	0.00792387	-	-	1.64401
BRD-K59030325	0.0199983	0.0082216	0.00363857	0.0260786	0.00205778	-	-	3.78276
BRD-K56240103	0.0199974	-0.000227988	0.00636639	0.0339959	-0.000139441	-	-	2.90839
BRD-K15401903	0.0199973	0.00288832	0.00477337	0.028863	0.00347	-	-
BRD-K00611064	0.0199959	0.00476925	0.0014876	0.0286391	0.00509577	-	-	8.14277
galantamine	0.0199858	0.00275951	-0.00345362	0.0241377	0.0165281	-	-	1.24117
620_7033_4267	0.0199847	0.00970505	0.00320368	0.0294896	-0.00242892	-	-
calpeptin	0.0199804	-0.00215862	0.00481683	0.0259637	0.011339	-	-	0.177092
BRD-K50008654	0.0199804	0.0130519	0.00835955	0.0226435	-0.00409421
BRD-K89362730	0.0199714	0.00474063	0.00059786	0.0269562	0.00764808	FLI1, DHX9	Binding of RNA helicase A to the transcription factor EWS-FLI1 inhibitor, Apoptosis stimulant	4.08885
BRD-K96804382	0.0199708	0.00345294	0.000507946	0.0340796	0.00190126	-	-	1.37918
BRD-K47116958	0.0199658	-0.00175955	-0.000293794	0.0355239	0.00646092	-	-	4.147
BRD-K42713448	0.0199636	0.00435271	0.00360389	0.0190652	0.0129053	-	-
BRD-K99515159	0.0199531	0.00333035	-0.00392017	0.0443058	-0.00380969	-	-	2.53246
BRD-K53255530	0.0199482	-0.00273015	0.00041068	0.0320479	0.010168	-	-
BRD-K42568865	0.0199473	0.000949407	0.00244901	0.0372611	-0.000764976	-	-	4.20308
BRD-K88058683	0.0199466	0.0136705	0.00288863	0.0120769	0.0112571	-	-	2.3543
BRD-K72694905	0.019935	0.0137435	0.00423965	0.0256064	-0.00371952	-	-
BRD-K83859448	0.0199303	0.00434298	-0.000853957	0.0244124	0.0119592	-	-	2.87957
BRD-K00505499	0.0199242	0.00564569	-0.00397899	0.0312804	0.00690129	-	-	1.87047
BRD-K05487130	0.0199236	0.0085142	0.00431817	0.0280145	-0.000999768	-	-	3.91867
BRD-K18861610	0.019923	-0.00662836	-0.00293312	0.0420076	0.00739998	-	-	3.0312
BRD-K61247793	0.0199204	0.00143215	0.00372807	0.0297911	0.00488954	-	-	2.75032
BRD-K39017054	0.0199151	0.000437985	0.00104625	0.0325403	0.00580568	-	-
BRD-K49156662	0.0199068	-0.00456752	0.00199691	0.0393294	0.00305472	-	-
BRD-K94049419	0.019906	0.00038567	0.00300981	0.0301558	0.00626073	-	-	3.0312
DR-2313	0.0199026	0.00623952	0.00221197	0.0242608	0.00709285	-	-	3.0455
BRD-K78276903	0.0199009	-0.00291698	-0.00344765	0.0436493	0.002517	GRIN2B, GRIN1	Adrenergic receptor antagonist, Glutamate receptor antagonist	8.47235
BRD-K38929751	0.0198988	0.00816587	0.00080386	0.0228667	0.00796112	-	-	4.13462
BRD-K40367360	0.0198912	0.0026827	0.00804148	0.0140211	0.015037	-	-	4.49386
BRD-A01848933	0.0198905	0.00067256	0.00866707	0.0186559	0.0117855	-	-
BRD-K02529187	0.019889	0.0024451	0.00136493	0.0301077	0.00586017	-	-	4.207
BRD-K31393518	0.0198862	0.00796612	-0.00235645	0.0208465	0.0133163	-	-	2.7696
BRD-K85500722	0.0198847	0.00993736	-0.00099714	0.0288198	0.00200939	-	-	3.30061
BRD-K89361242	0.019872	0.0104164	-0.0027743	0.0215603	0.0105417	-	-	1.98587
BRD-K03272554	0.0198694	0.000788667	0.0023823	0.0437207	-0.00715287	-	-
BRD-K23609283	0.0198671	-0.00788396	0.00105944	0.0418175	0.00474121	-	-	2.26008
7-nitroindazole	0.0198663	0.0185251	0.00188106	0.0256641	-0.00633776	-	-	3.14408
BRD-K25540102	0.0198611	0.00417726	0.00646738	0.0242625	0.00481495	-	-	3.44274
BRD-K67197636	0.0198577	0.00414173	-0.000948292	0.0298851	0.00663683	-	-
zebularine	0.0198493	0.0040982	-0.00291231	0.0319256	0.00658722	-	-	2.8861
BRD-K47029744	0.019849	0.00796188	0.00429961	0.0314334	-0.00399697	-	-	3.68144
ibuprofen-piconol	0.0198458	0.00986332	-0.00427749	0.0351018	-0.000996088	-	-	1.99922
BRD-K95501793	0.0198457	0.00528624	0.00204509	0.0164222	0.015938	-	-	2.72249
BRD-K80176886	0.0198418	-0.001536	0.00421899	0.025993	0.0110076	-	-	3.56133
BRD-K53249762	0.0198393	0.000451094	0.00197994	0.0332301	0.00401756	-	-	3.1706
BRD-K11504077	0.0198384	-0.00063716	0.00475962	0.0304932	0.00506117	-	-	7.53472
MLN-4924	0.0198355	0.0123156	0.00117673	0.0276923	-0.00151372	MAPK14	P38 MAPK inhibitor	4.94036
BRD-K47569187	0.0198326	-0.00205833	0.00155423	0.0436537	-0.00348445	-	-	4.65726
BRD-K80400482	0.0198284	-0.00877393	-0.00153803	0.0495475	0.000421132	-	-
BRD-K03371390	0.0198258	-0.00606986	-0.00647805	0.047844	0.00435562	-	-	2.56776
BRD-K20531360	0.0198237	0.00567068	-0.00190803	0.0389528	-0.00306802	-	-	1.56859
BRD-K77548697	0.0198151	-0.00019886	0.00241493	0.0303804	0.00703369	-	-	2.59945
BRD-K49878220	0.0198112	0.00201393	0.00534811	0.0343436	-0.00208318	-	-	2.99507
BRD-K90004840	0.0198112	0.00528171	0.00985259	0.028064	-0.00357592	-	-	3.77062
esomeprazole	0.0198061	0.0047483	0.00284082	0.0268592	0.00516393	-	-
BRD-K19549004	0.019804	-0.00313276	0.00455683	0.0316487	0.00653526	-	-	4.28304
BRD-K92884779	0.019791	0.00623483	-0.00050159	0.0255145	0.00833428	-	-	1.85593
BRD-K90074540	0.0197894	0.00796801	0.00149971	0.024834	0.00527721	-	-	3.778
BRD-K45037973	0.0197802	0.0156179	0.00454979	0.0161503	0.00324239	-	-	5.52985
BRD-K77343050	0.0197781	-0.00201021	0.00060677	0.0296434	0.0113163	-	-	2.35587
NF-449	0.0197634	0.0106403	-0.00174866	0.029939	0.000696251	-	-	2.47204
BRD-K65829768	0.0197551	0.0060435	0.00047764	0.0247414	0.00824776
BRD-K90863245	0.0197452	0.00814938	0.0018643	0.025709	0.0037677	-	-
FR-139317	0.0197425	0.00139661	-0.00374963	0.038953	0.00288495	-	-	1.9192
wnt-c59	0.0197385	0.00334222	-0.000609682	0.0286271	0.00811739	-	-	2.05035
BRD-K63299476	0.0197384	0.00739968	-0.00073827	0.0255632	0.00725232	-	-	2.88662
BRD-K28924192	0.0197348	0.00687851	0.00688626	0.0234394	0.0022653	-	-	6.82946
BRD-K96425583	0.0197332	0.00849686	-0.00121451	0.0315818	0.000602288	HDAC2, HDAC1	HDAC inhibitor	0.81422
BRD-K63270290	0.0197312	0.000717273	-0.00724821	0.0405567	0.00543665	-	-
BRD-K03552198	0.0197293	0.00240004	0.00199377	0.0311344	0.00393046	-	-	5.70798
BRD-K13839830	0.0197285	0.00460853	0.00613475	0.0322128	-0.00349898
BRD-K39140255	0.0197285	0.00510151	0.00719131	0.0199175	0.00724659	-	-	2.73452
BRD-K85099724	0.0197283	0.00411256	0.00396267	0.0256748	0.00570661	-	-	3.17837
BRD-K65761985	0.0197253	0.0106997	-0.00109806	0.0282974	0.00155152	-	-
BRD-K41513047	0.0197246	0.0103599	0.00336567	0.0153337	0.0103899	-	-	4.01274
BRD-K25954314	0.0197196	0.00339608	-0.00284502	0.0377879	0.00110027	-	-	3.02795
BRD-K63645840	0.0197049	0.00965431	0.00022704	0.0177005	0.0118279	-	-	4.48189
BRD-K38431902	0.0197041	0.00919141	0.000202847	0.0293722	0.000641737	-	-	3.35831
fipronil	0.0196933	-0.00336682	0.00301945	0.0420609	-0.0023269	-	-	6.03314
BRD-K89366873	0.0196928	0.00266868	0.00364811	0.0226696	0.0103991	-	-
BRD-K32491833	0.0196924	0.00530334	0.00276125	0.0272427	0.00407745	-	-	2.41753
BRD-K86584551	0.0196918	-0.0025177	0.00695041	0.0275057	0.00744526	-	-
mead-acid	0.0196867	-0.0064274	0.00409026	0.0420092	-0.000298591	-	-	4.83268
BRD-K18294324	0.0196851	0.00901255	-0.00408576	0.0369376	-0.00249413	DDR1	Ephrin inhibitor	3.42312
BRD-K04687955	0.0196818	0.00955841	0.00875225	0.0215993	-0.000546414	-	-	5.05588
BRD-K04251331	0.0196723	-0.00187893	0.000840588	0.0307477	0.00963528	-	-	3.74525
enilconazole	0.0196712	-0.0015405	0.00482046	0.0268204	0.00924196	-	-	3.20203
BRD-K50126643	0.0196674	0.00158766	-0.00108836	0.0327315	0.00610397
BRD-K65409714	0.0196647	-0.00162847	0.00461827	0.0322786	0.00406089	HTR1B, HTR1A, HTR1D, SLC6A4, HTR7	Serotonin receptor agonist, Serotonin receptor antagonist	7.87397
BRD-K77620628	0.0196637	0.00105878	-0.00695085	0.0366402	0.00857927	DHFR	Dihydrofolate reductase inhibitor	1.36434
BRD-K72833997	0.0196625	0.0013604	0.00345172	0.0223248	0.0121881	-	-	2.14156
topiramate	0.0196485	0.00704816	-0.00297677	0.0375031	-0.00227749	-	-	2.19494
BRD-K06250012	0.0196468	0.00664101	0.0025838	0.031699	-0.00163016	-	-
BRD-K10820981	0.0196467	0.00484912	-0.00335797	0.0310759	0.00672634	-	-	4.82813
BRD-K62184784	0.0196467	0.00438977	-0.00014158	0.0343141	0.00073099	-	-	6.36244
BRD-K56601439	0.0196445	0.014685	-0.00364098	0.0207524	0.00749251
BRD-K15892609	0.0196379	-0.00409927	0.000267863	0.0331255	0.00998175	-	-
BRD-K43188042	0.0196378	-0.00286221	0.00142455	0.0293982	0.011315	-	-	2.92311
BRD-K48918097	0.0196376	-0.00309075	0.000442261	0.0367421	0.00518173	-	-	2.6954
BRD-K86757617	0.0196344	-0.00169634	-0.00578027	0.0430225	0.00372288	-	-	2.3727
PP-3	0.0196341	0.00372989	0.00140286	0.0320152	0.0021202	-	-
BRD-K75779523	0.0196256	0.0078296	0.00606688	0.0100387	0.0153161	-	-
BRD-K01822243	0.0196217	0.00731665	0.00493881	0.0211404	0.00584753	-	-
BRD-K21740361	0.0196189	0.0083558	-0.00419996	0.0427673	-0.00768537	-	-
BRD-K70170026	0.0196186	-0.00331115	0.000316091	0.0267715	0.0154607	-	-	3.99694
BRD-K72219469	0.0196169	-0.00255961	-1.22967e-05	0.0466083	-0.00480259	-	-	4.07521
BRD-K81732150	0.0196077	0.00461611	0.0027267	0.0151387	0.0167339	-	-	3.57655
parthenolide	0.0196022	0.0130254	0.000953081	0.026982	-0.00175614
BRD-K08394807	0.0196015	0.00244579	0.00188793	0.0359935	-0.00112409	HDAC6	HDAC inhibitor	2.37662
BRD-K37455698	0.0195977	0.000493859	0.000497675	0.0362306	0.00197316	-	-	9.45493
BRD-K18296568	0.019595	0.00831609	0.00280952	0.0245875	0.00347692	-	-	2.05118
BRD-K62463442	0.0195945	0.00101653	0.00492433	0.0274552	0.00579295	-	-	2.14805
BRD-K58999044	0.0195899	0.00340328	0.00791929	0.0276463	0.000210941	PTGS1, PTGS2	Cyclooxygenase inhibitor	4.99333
BRD-A01317026	0.0195882	0.00253019	-0.001423	0.0401746	-0.0021055	-	-	3.60563
BRD-K58610656	0.0195786	0.00895726	-0.0011636	0.0200857	0.0112778	HTR1D, HTR2A	Serotonin receptor agonist, Serotonin receptor antagonist	7.16478
BRD-K95927760	0.0195762	-0.0046567	0.00587494	0.0305741	0.0073601	DRD2, DRD1, HTR2A, HRH1, DRD3, HTR2C, HTR6, DRD4	Dopamine receptor antagonist, Serotonin receptor antagonist	7.1047
BRD-K23196166	0.0195754	0.00130546	0.00408615	0.0306313	0.00312798	-	-	2.88662
BRD-K32827536	0.0195692	0.00121678	0.00257369	0.0302851	0.00506281	-	-	2.86892
BRD-K90960272	0.0195656	0.00835618	0.00954849	0.00795111	0.0132754	-	-	2.8879
pasireotide	0.0195625	0.00606785	0.00478469	0.0172464	0.011026	-	-	1.71321
BRD-K92754162	0.0195618	-0.00686049	-0.00570793	0.0512359	0.000456131	-	-
varenicline	0.0195608	-0.000777287	0.00210346	0.0293501	0.00844528	-	-	4.21055
BRD-K87790666	0.0195588	0.0117675	4.401e-05	0.0255989	0.00170721	-	-	2.90349
BRD-K92953664	0.0195579	0.0130963	0.00465732	0.0193778	0.00198435	-	-	6.97654
BRD-K75393430	0.0195566	-0.00155495	0.00221063	0.0294048	0.0090527	SLC6A2, SLC6A4	Tricyclic antidepressant	6.96301
BRD-K61092554	0.0195532	0.00412837	0.00314837	0.0228856	0.00894405	-	-
BRD-K43261169	0.0195504	0.00074159	0.00683831	0.0246262	0.00689465	P2RY12	Purinergic receptor antagonist	5.7622
BRD-K85162983	0.0195454	0.00137514	-0.00175764	0.0357553	0.003718
BRD-K47314501	0.0195448	0.00590593	0.00157484	0.0367855	-0.00517661	-	-	3.76696
BRD-K39318389	0.0195446	0.00283986	-0.00245251	0.0304491	0.00825274	-	-	3.15137
BRD-K47423282	0.0195442	0.00774327	-0.00113805	0.0308021	0.0016812	-	-	2.03556
BRD-A02612852	0.0195431	0.00060617	0.00114049	0.0316117	0.0057278	-	-
methylene-blue	0.0195398	0.00818991	-0.00250394	0.0225864	0.0108074	-	-	5.02251
BRD-K29655991	0.0195349	-0.000813625	-0.00372628	0.0369661	0.00664351	-	-	1.57848
BRD-K39921295	0.0195341	0.0104298	0.0115097	0.0228982	-0.00576947	-	-	2.26295
BRD-K37014934	0.0195338	0.012912	-0.00136382	0.0251339	0.00238545	-	-	2.59945
BRD-K07479774	0.0195311	0.00576276	0.0002659	0.0241274	0.00890619	-	-	6.07843
BRD-K35668999	0.0195252	0.00669215	-0.00194762	0.0285616	0.00574436	-	-	3.98435
BRD-K90041565	0.0195149	0.000523844	-0.00479887	0.0417545	0.00155034	-	-
BRD-K61877191	0.0195108	0.00719969	-0.00251899	0.0301451	0.00419578	-	-	3.84349
DMBI	0.0195093	0.00541265	-0.00327374	0.0338258	0.00305388	-	-	2.71845
BRD-K35400569	0.0195084	-0.0017248	-0.00127801	0.0290759	0.0129437	-	-	2.38849
BRD-K49923205	0.0195056	0.00624473	-0.00281056	0.0318446	0.0037324	-	-	4.84176
BRD-K07442049	0.0195041	-0.00451279	0.00324024	0.0344562	0.00582448	-	-	6.10902
BRD-K04632192	0.0195012	0.00137384	-0.00540662	0.0389997	0.00403557	-	-	3.29335
BRD-K42605555	0.0195007	-0.00264311	0.00592266	0.033355	0.00236677	-	-	3.1848
BRD-K54862370	0.0195004	0.00289967	0.00568614	0.0241713	0.00624366	-	-
BRD-K23103632	0.0194953	0.00660511	-0.0024428	0.0320407	0.00278769	-	-
BRD-K93203589	0.0194943	0.00942075	-0.00350917	0.0254692	0.00760791	-	-
BRD-K14975149	0.0194921	0.0104718	0.00175163	0.015356	0.0114047	-	-	7.34573
KI-16425	0.0194871	0.00999617	-0.0008736	0.0235934	0.0062582	-	-
BRD-K76021727	0.0194846	0.00311344	0.000223704	0.0338581	0.00177387	-	-	1.70789
BRD-K32043305	0.0194819	0.00956319	-0.00132138	0.0212301	0.00949198	-	-	4.30386
BRD-K85101688	0.0194778	0.0137097	-0.00336574	0.0284776	0.00013401	-	-	2.37804
BRD-K18229142	0.0194697	0.00184494	0.00308004	0.0373067	-0.00329228	-	-
BRD-K65883179	0.019468	0.00591479	0.0072638	0.0152724	0.0104851	-	-
BRD-K67096634	0.0194648	0.00541686	-0.00204472	0.031661	0.00389655	-	-	3.64876
BRD-K73700643	0.0194571	0.00271923	-0.00236085	0.0386467	-9.0764e-05	-	-	3.00793
BRD-K92573321	0.0194566	0.00374864	0.00929212	0.0112537	0.0146188	KCNK3, KCNK9	Potassium channel blocker	6.77812
BRD-K54971989	0.019448	0.00863383	-0.00502594	0.0420615	-0.00677346	-	-	3.13304
BRD-K30218805	0.0194445	0.00720648	0.0015722	0.0353967	-0.00528635	-	-
GW-4064	0.0194375	0.00643293	-0.0027183	0.0257197	0.00944073	-	-	2.6192
BRD-K90848748	0.0194364	0.0023829	0.0152329	0.0190181	0.00223893	-	-
BRD-K27540772	0.0194309	-0.00405527	0.00796602	0.0345639	0.00038719	-	-	2.41753
BRD-K87275815	0.0194303	0.00493252	0.00529026	0.0143981	0.0142397	-	-	3.71119
U-0124	0.0194246	0.0030181	0.0012336	0.0291349	0.00546262	-	-
CPI-1189	0.019424	0.00315094	0.00616012	0.0329034	-0.00336655	-	-	4.48783
BRD-K02719847	0.0194226	0.0114641	-0.00778047	0.0362823	-0.00112067	-	-	2.22168
BRD-K35404627	0.0194208	0.00369686	0.00660022	0.0219572	0.00658725	-	-	0.660824
BRD-K25993054	0.0194174	0.00364781	-0.00060343	0.0278486	0.00794171	-	-
BRD-K42478751	0.0194132	0.00374289	0.00583294	0.0184414	0.0108091	-	-	2.96627
BRD-K47203692	0.0194117	0.0111463	0.00112245	0.0254131	0.00114155	-	-
BRD-K65988431	0.0194082	0.00930066	-0.00194471	0.0278892	0.0035712	-	-	4.26473
BRD-K73183447	0.0194078	0.00992868	0.00153146	0.0154596	0.0118958	-	-	2.87486
BRD-K83010768	0.0194077	0.00150829	-0.00046072	0.0354868	0.00228098	-	-
BRD-K73177528	0.0194041	0.00766951	0.00114462	0.0207918	0.00920237	-	-
BRD-K75111717	0.0194036	-0.000142513	0.00658579	0.0284048	0.00395911
BRD-K36002293	0.0193952	0.00659722	-0.00049789	0.0213515	0.0113395	-	-	1.79262
fenbufen	0.0193943	0.00942068	-0.00870326	0.0343323	0.00373899	-	-	2.97411
delavirdine	0.0193921	-0.00711807	-0.00469065	0.0494425	0.00115034
BRD-K97516320	0.0193904	-0.00767712	-0.00293888	0.0382112	0.0111857	-	-	6.24605
BRD-K57734337	0.0193904	0.00228852	-0.0017432	0.038868	-0.00063252	-	-	4.1033
BRD-K28691459	0.0193887	0.00985165	0.00053781	0.0222725	0.00611542	-	-
BRD-K90358614	0.0193886	0.00899091	0.00068114	0.0174347	0.0116704	-	-	1.3376
BRD-K29809218	0.0193865	0.00607042	0.00185173	0.0244746	0.0063763	-	-	3.97149
BRD-K18310625	0.0193846	0.00925111	-0.0025797	0.0241796	0.00791829	-	-	2.95974
BRD-K69389910	0.0193835	0.00289989	0.00915688	0.0248568	0.00185347	-	-	2.88837
BRD-K24269428	0.0193806	0.0129991	0.00520878	0.0183831	0.00217026
BRD-K23713813	0.01938	0.0170377	-0.00175213	0.0220617	0.00141279	-	-	3.03414
BRD-K13122423	0.0193796	-0.00131626	0.00280663	0.0181757	0.0190932	-	-	3.11635
BRD-K76353834	0.0193736	0.0106041	-0.00101916	0.0261684	0.00299383	-	-	4.49475
BRD-K28027757	0.0193722	0.00343575	0.0048576	0.0219853	0.00846572	-	-	4.96003
BRD-K87648209	0.0193705	0.0137586	0.00439191	0.0265754	-0.00598508	-	-	2.56938
BRD-K87967185	0.0193645	0.00596017	-0.00116556	0.0171494	0.016785	-	-	3.22175
BRD-K98020844	0.0193621	0.00324753	0.00836339	0.0216501	0.00546311	-	-	1.67609
tubocurarine	0.0193489	-0.00124685	0.000447598	0.0364841	0.00301304	-	-
BRD-K45282594	0.0193477	0.00401333	0.00135014	0.0293957	0.00393614	-	-
BRD-K84103449	0.0193474	-0.00198862	0.00393911	0.0274902	0.00925405	-	-	1.67541
BRD-K36208388	0.0193417	0.00498629	0.00260701	0.0291894	0.00190069	-	-	3.30494
BRD-A25852694	0.0193375	0.000749763	0.000145703	0.036285	0.00149449	AR	Androgen receptor antagonist	3.30627
sulfinpyrazone	0.0193367	0.00321924	-0.00267531	0.0424238	-0.00429434	-	-	2.62253
BRD-K33767317	0.019335	0.00506177	0.00485004	0.0271363	0.00162191	-	-	4.81786
BRD-K16323731	0.0193349	0.00236944	0.00309229	0.0327878	0.000420251	-	-	2.53246
BRD-K32644160	0.0193339	-0.000225246	0.00288947	0.0210992	0.0149044	-	-	4.80954
BRD-K01825565	0.0193282	0.00556782	-0.00466263	0.0371268	0.000624397	-	-	2.74644
benserazide	0.019324	0.00262694	-0.00208194	0.0312393	0.00686363	-	-	3.10536
BRD-A89575866	0.0193194	-0.00729996	0.00106199	0.0373935	0.00748324	-	-	4.39478
BRD-K11577165	0.0193188	0.0111187	0.00356659	0.00953028	0.014422	ADORA1	Adenosine receptor agonist	1.92183
BRD-K61148205	0.0193186	-0.00855587	0.00342803	0.0261554	0.0176097	-	-	3.97591
BRD-K63944563	0.0193186	0.0122838	0.00415693	0.0207694	0.00142707	-	-
BRD-K01922054	0.0193171	0.0141421	-0.00032692	0.0240154	0.00080371	-	-	3.48184
BRD-K77023196	0.0193058	0.00448959	0.0084778	0.0183422	0.00730207	-	-	2.84436
BRD-K45190659	0.019304	2.87e-05	0.00773081	0.0254271	0.00542132	-	-	2.96339
BRD-K60584379	0.0193003	-0.00202627	0.00114386	0.0337318	0.00575117	-	-	3.38279
CTPB	0.0192985	-0.00218606	-0.00672765	0.0421975	0.00531325	-	-	1.8707
BRD-K65112040	0.0192953	0.00947974	-0.00100229	0.0235048	0.00660842	-	-	1.5538
butyrylcholine-cl	0.0192944	0.0057557	0.00756383	0.0157415	0.00952774	-	-	3.13313
BRD-K73171326	0.0192944	0.0086228	0.00104433	0.0206394	0.00828221	-	-	3.97043
BRD-K51160592	0.0192934	0.0085318	0.0015516	0.0196563	0.00884718	-	-	4.24681
ganaxolone	0.0192895	0.00369915	-0.00704923	0.027222	0.0147071	-	-	2.42549
BRD-K14449601	0.0192773	0.00385183	0.00389089	0.0208693	0.00994245	HSP90AA1	HSP inhibitor	0.57317
BRD-K01632787	0.0192761	0.0129283	0.00200226	0.00702347	0.0165983	-	-	1.85055
naphazoline	0.0192715	0.00662475	-0.00348195	0.0220809	0.0133194	FLT3, KIT	PKC inhibitor, FLT3 inhibitor, KIT inhibitor	2.77714
BRD-K27290412	0.0192695	0.00410699	-0.00076666	0.0333508	0.00184787	-	-
BRD-K79025148	0.0192621	0.00489659	-0.000644892	0.0352603	-0.00098784	-	-	2.55431
AT1-SHH-09	0.0192616	0.00562007	-0.00192268	0.0298362	0.00498971	-	-	2.45807
BRD-A06909528	0.0192603	0.00391059	-0.00180836	0.0321861	0.00423215	OPRM1, OPRK1, OPRD1	Opioid receptor agonist	5.55907
BRD-K74933734	0.0192602	0.00074755	0.00448908	0.0243595	0.00892421	-	-	4.30796
fludarabine-phosphate	0.0192598	0.0023163	0.00425314	0.0279719	0.00397815	-	-	1.94213
lidocaine	0.0192589	-0.000644295	0.00187163	0.0305282	0.00676229	-	-	3.79777
BRD-A77292814	0.0192479	0.00239794	2.905e-05	0.0261741	0.00989476	-	-	3.55137
BRD-K70935154	0.0192398	0.00507208	0.00634182	0.0200165	0.00704929	-	-	1.30949
BRD-K87520488	0.0192384	0.00150092	0.00406576	0.033053	-0.000142808	-	-	7.89489
BRD-K76734722	0.0192364	-0.00483661	0.00294621	0.0289293	0.0114339	-	-	4.44242
BRD-K64730761	0.019226	0.00511069	0.00061768	0.0230964	0.00962718	-	-	1.87957
AZD-1283	0.0192255	0.00409057	-0.00230761	0.0331672	0.00350071	-	-	3.69093
BRD-K95010912	0.0192219	0.00669881	-0.00366763	0.029878	0.00553468	-	-
BRD-K97006656	0.0192184	0.000501482	0.00799151	0.0119899	0.0179539	-	-
BRD-K19800225	0.0192128	0.00837859	0.00064765	0.0194212	0.00997815	-	-	4.19282
BRD-K81293413	0.0192108	0.00296591	0.0005282	0.0260671	0.00886036	-	-	1.89272
BRD-K34931072	0.0192093	-0.00113786	0.00564159	0.0377243	-0.00380939	-	-	5.57414
BRD-K51498721	0.0192093	-0.0098824	-0.000189364	0.0437241	0.00476625	-	-	3.08033
BRD-K28916436	0.0192025	0.00813401	-0.00121411	0.0271794	0.00430576	-	-	4.23184
BRD-K80174954	0.0191973	-0.0063352	0.00709908	0.0368329	0.000797807	-	-	3.80098
HC-030031	0.0191924	-0.00144525	-0.00718614	0.0443558	0.00266041	-	-	4.51418
BRD-K61881697	0.0191917	0.00208761	0.00195761	0.0320641	0.00227415	-	-
BRD-K01971712	0.0191916	0.00970896	-0.00106398	0.0203626	0.00937551	-	-
BRD-K37848780	0.0191905	0.0028618	0.00296809	0.0212092	0.0113419	-	-	2.84275
BRD-K95712112	0.0191904	-0.00077399	0.00569557	0.0237981	0.00966114	-	-	4.3373
BRD-K73475697	0.0191873	0.00638672	0.00458319	0.0218465	0.00555821	-	-	4.88473
BRD-K65107903	0.0191832	0.00387114	0.0061305	0.0307215	-0.00235671	-	-	3.5123
BRD-K69471644	0.0191794	0.00380999	-0.00231288	0.0306845	0.00617724	-	-	4.06072
L-glutamic-acid	0.019178	0.00305686	0.00251935	0.0224045	0.0103752	-	-	3.44033
BRD-K23876588	0.0191737	0.00512354	1.49118e-05	0.0280168	0.00519214	-	-	3.28675
dofequidar	0.0191698	-0.00639517	0.00186713	0.0490005	-0.00613286	-	-	4.16356
BRD-K54476947	0.0191688	0.00168199	0.00303577	0.0369829	-0.00336307	PDE3B, PDE3A	Phosphodiesterase inhibitor	4.5463
BRD-K13060097	0.0191673	0.0096292	0.00132397	0.020068	0.00731344	HTR1A	Serotonin receptor antagonist	5.00641
cefepime	0.0191632	0.00183446	0.00237163	0.026102	0.00801835	-	-	3.53827
fursultiamine	0.0191586	-0.00262411	0.00252941	0.0262898	0.0121222	-	-	6.73713
BRD-K56881825	0.0191585	0.00315383	0.00216588	0.0268691	0.00612811	-	-
BRD-K94582694	0.0191524	0.0128727	0.000906	0.0164881	0.00803804	-	-	4.48438
BRD-K44131977	0.0191384	0.00309275	-0.00104943	0.0388937	-0.00266017	-	-
BRD-A01717918	0.0191333	0.00520098	-0.0006214	0.0301123	0.00357476	-	-	3.32427
BRD-K83229680	0.019129	0.00588759	0.00150855	0.0227309	0.00813094	-	-	3.7109
BRD-K02511275	0.0191272	0.00713343	0.000618655	0.029401	0.00110121	-	-	4.2809
BRD-K82206012	0.0191267	0.00567482	0.00584309	0.0244635	0.00227198	-	-	4.08414
BRD-K28636199	0.0191251	-0.00255769	0.00359212	0.039937	-0.00272121	AR	Androgen receptor agonist	4.09141
BRD-K19608864	0.0191184	-0.00288104	0.00323971	0.0376123	0.00026575	-	-	2.96957
alitretinoin	0.0191169	0.0123399	-0.00230566	0.0139963	0.0142034
BRD-K56473018	0.0191129	0.00588536	0.00128253	0.0215488	0.00950916	-	-	3.30483
BRD-K94657740	0.0191129	0.00916511	8.555e-05	0.0237811	0.00519395	-	-
BRD-K64904523	0.0191071	0.00656599	-0.00069932	0.0243976	0.00794997	-	-	2.03487
CFTRinh-172	0.019107	0.0129277	0.00393261	0.0166086	0.00474503	-	-	3.12724
BRD-K42589221	0.0190999	0.0089921	-0.00747576	0.0342078	0.0024757	-	-	3.1064
BRD-K89952634	0.0190916	0.0132752	0.00242976	0.00497265	0.0175056	-	-
BRD-K09503339	0.0190906	0.0132323	-0.000295398	0.0178984	0.00734574	-	-	3.45661
BRD-K23038591	0.0190898	0.00390086	-0.00933792	0.0290679	0.0145487	-	-	2.5975
BRD-K42799692	0.0190875	0.0131667	0.00586415	0.0141966	0.00494751	-	-	2.98313
BRD-K99074976	0.019087	0.00192702	-0.00257856	0.0174719	0.0213537	-	-	1.39628
metoprolol	0.0190859	-0.00846259	-0.00528755	0.031592	0.0203299	-	-	2.98845
BRD-K43580610	0.0190831	0.0026688	0.00351635	0.0279096	0.00407144	-	-
picrotoxin	0.019079	0.0020649	-0.000364873	0.0251641	0.0112938	-	-	3.76327
BRD-K87801302	0.0190767	0.00259499	-0.00042631	0.038776	-0.0027912	DRD2, HTR2A	Dopamine receptor antagonist	5.82751
prostaglandin-a1	0.0190756	0.00815711	0.00345045	0.0230361	0.00350744	-	-	2.19494
BRD-K00585841	0.019074	0.000384491	0.00816913	0.0188545	0.0107399	-	-	4.55954
ML-161	0.0190722	0.00944452	0.00431969	0.00845717	0.0159231	-	-	6.70478
BRD-K81146041	0.0190657	0.00712445	0.00495108	0.0239901	0.00206584	-	-
BRD-K79149684	0.0190604	-0.00447539	0.001965	0.026792	0.0138392	-	-	4.41854
BRD-K45278408	0.0190582	0.0120893	0.000380181	0.0225161	0.00313073	PSMB1	Proteasome inhibitor	8.24297
BRD-K51228600	0.0190509	0.00694092	0.00021197	0.0318959	-0.00094696	-	-	2.1762
BRD-K42849858	0.0190498	0.00207467	0.00587522	0.0178007	0.012349
BRD-K56916873	0.0190486	0.0103728	0.00763055	0.0214556	-0.00136176	-	-	4.32716
BRD-K58853583	0.0190481	0.00318566	-0.00357703	0.0438952	-0.00540767	-	-	3.29681
BRD-K74779337	0.0190418	0.00522881	-0.00162642	0.0299113	0.00456979	-	-
BRD-K69492024	0.0190363	0.000502417	-0.00558875	0.0334757	0.00968315	-	-	2.90678
BRD-K47716199	0.0190355	-0.000840517	-0.000425513	0.0320004	0.00733671	-	-
BRD-K71563254	0.0190341	0.00628304	0.00354895	0.0213674	0.00686881	-	-	3.08033
BRD-K13719101	0.0190313	0.00736721	-0.00530041	0.0229139	0.0130819	-	-	4.75883
dyn-b	0.0190283	0.0123706	0.00213524	0.0256857	-0.00213485	-	-	3.1399
BRD-K43499440	0.0190278	-0.00164954	0.00211787	0.0425364	-0.00494917	-	-	4.09516
BRD-K15111910	0.0190227	0.00151769	0.0020503	0.0331763	0.00130116	HTR1D, HTR1B	Serotonin receptor agonist	4.82363
BRD-K30064966	0.0190219	0.00156873	-0.00198153	0.0337766	0.00467993	-	-
LY-2090314	0.0190174	0.00429266	0.000586928	0.0358428	-0.00268759	-	-	3.63567
quinine	0.0190172	-0.00128403	0.00140128	0.034764	0.00315301	-	-	2.03366
EMF-sumo1-7	0.0190143	0.0110443	0.00502449	0.0142912	0.00766863	-	-
BRD-K12916986	0.0190133	-0.00192838	-0.00114346	0.0386226	0.0024758	-	-	6.02722
BRD-K55093794	0.0190109	0.00322572	0.00621377	0.0173955	0.0111868	-	-	1.46776
BRD-K35240878	0.01901	-0.00591928	0.0046193	0.0364953	0.00282469	HDAC1	HDAC inhibitor	3.77745
BRD-K97138361	0.0189876	0.0103806	0.00054221	0.0130011	0.0140512	-	-	3.37553
BRD-K69659917	0.0189868	0.00961421	-0.00612505	0.0263708	0.00811369	-	-	3.10761
BRD-K15476875	0.0189868	0.00674572	0.00791795	0.0139166	0.00939343	-	-	2.99611
BRD-K22166546	0.0189858	0.00466476	-0.00639025	0.0342016	0.00549547	-	-
BRD-K37055263	0.0189855	-0.00175364	-9.38418e-05	0.0365279	0.0032907	-	-	4.18718
BRD-K90846035	0.0189849	0.00785157	-0.00100033	0.0295833	0.00153522	-	-	3.95348
BRD-K31998493	0.0189847	-0.00566241	0.00408153	0.0474654	-0.00791512	-	-
BRD-K61053165	0.018979	0.00467777	-0.00176531	0.0264796	0.00856602	-	-	3.34288
BRD-K74594501	0.018973	0.00601387	-1.98115e-05	0.0235725	0.00837945	-	-
BRD-K20000701	0.0189711	-0.0025413	0.00980387	0.0314247	-0.000744929	-	-	4.94253
BRD-K86155080	0.0189655	-1.244e-05	0.00133368	0.0388313	-0.00222162	-	-
BRD-K36651002	0.0189608	-0.00463011	0.00624819	0.0282047	0.00809878	-	-	7.34932
SD-6-035-A8	0.0189571	0.017906	0.00302408	0.0119952	0.00498888
BRD-K57902493	0.018957	-0.000191395	0.0033403	0.0244938	0.0102713	-	-
BRD-K00541156	0.0189533	0.00396606	-0.00357822	0.0388692	-0.00135053	-	-	2.245
BRD-K66413698	0.0189512	0.0112855	-0.00255198	0.0226794	0.00648947	PIK3CD, PIK3CG	PI3K inhibitor	2.04577
BRD-K21626096	0.0189467	0.00863097	-2.5335e-05	0.0305555	-0.00126771	-	-	3.68379
BRD-K13027675	0.0189465	0.00188451	-0.000933136	0.0307343	0.00620734	-	-	4.5028
BRD-K00507184	0.0189418	0.00577808	0.00027286	0.0251334	0.00669929	-	-	6.01807
RK-682	0.0189292	0.00946616	-0.00551935	0.0168723	0.0170393	-	-	2.6007
BRD-K85965830	0.0189191	0.00329498	0.00062446	0.0233034	0.0106154	HIF1A	HIF modulator	3.16155
BRD-K65780164	0.0189188	0.00209168	0.00027482	0.0308431	0.00462802	-	-	1.45795
BRD-K06146388	0.0189183	0.003462	0.00202345	0.0176917	0.0146594	-	-	2.957
BRD-A84389633	0.0189166	0.00176758	-0.00201446	0.0409253	-0.00284526	-	-	4.21188
tibolone	0.018912	0.00556915	0.00471807	0.0339211	-0.00638419	-	-
BRD-A31602150	0.0189081	0.0124668	0.00505728	0.0157024	0.0045897
BRD-K53111504	0.018895	-0.000606527	-0.00224493	0.0300888	0.0105526	-	-	4.1517
BRD-K66633149	0.0188941	0.00857234	0.00204543	0.0288954	-0.00172488	-	-	2.90839
BRD-K20517870	0.0188919	0.00176911	-0.00263835	0.0178733	0.0207797	-	-	4.4087
BRD-K41185648	0.0188839	-0.00031762	0.00993921	0.0310853	-0.00293908	-	-	3.88521
BRD-K61020385	0.0188829	-0.00611082	0.00867032	0.0269371	0.00826926	-	-
BRD-K77237686	0.0188811	0.00805571	-0.00058172	0.0244376	0.00585066	-	-	0.199399
BRD-K26799408	0.0188793	0.00104702	0.000536033	0.0237367	0.0124388	-	-	6.47543
BRD-K17817744	0.018872	0.00463642	0.00168698	0.0304594	0.000961206	-	-	5.1921
BRD-K95285735	0.0188718	0.0109511	0.0036234	0.018546	0.00462318	-	-	2.14937
BRD-K74773935	0.0188586	0.0106241	0.00143156	0.0257005	-3.88661e-05	-	-	3.29135
BRD-K21139275	0.0188508	0.00360066	-0.000815115	0.0360064	-0.00109044	-	-	4.37718
eltanolone	0.0188471	0.00356563	0.00232607	0.0257468	0.00605578	-	-	2.91776
BRD-K23578173	0.0188471	0.00742211	0.00364099	0.0135077	0.0131234	-	-	2.84327
BRD-M74304337	0.0188407	0.000553852	-0.00125655	0.0272837	0.0111004	-	-
BRD-K87913872	0.0188326	-0.0010944	0.00119749	0.0301291	0.00743298	-	-	2.78378
BRD-K89121101	0.0188227	0.00283448	-0.00122655	0.0271078	0.00892975	-	-	2.372
gossypol	0.0188223	0.00560759	-0.000360787	0.0249127	0.00748504	-	-
BRD-K37741838	0.0188221	0.00484474	0.00062165	0.0404852	-0.00830729	-	-
pyrantel	0.0188188	0.0113964	0.000155515	0.0237399	0.0023458	-	-	2.81341
BRD-K80439608	0.0188141	0.00313357	-0.000379852	0.0376889	-0.00281455	-	-	3.0034
BRD-K38599483	0.0188129	-0.00547511	-0.00167337	0.0566254	-0.0118512	-	-	4.17313
BRD-K48541282	0.0188079	-0.00356492	0.00335792	0.0341946	0.00362825	-	-	3.73524
BRD-K27600134	0.0188068	0.00828472	0.0068241	0.0107522	0.0117525	-	-	4.15316
BRD-K26594332	0.0188063	0.00252301	0.00278961	0.0319959	0.000304005	-	-	3.92975
BRD-K50408407	0.018806	0.000410186	0.00069992	0.0308668	0.00563504	-	-	3.3178
BRD-K24746925	0.0188035	0.0051147	0.00639609	0.0288334	-0.00273713	-	-	2.72734
BRD-K76510844	0.0187989	0.00471196	-0.00136867	0.0295734	0.00468111	-	-	3.11318
BRD-K11641139	0.0187936	0.0003122	-0.00072001	0.031719	0.00627593
BRD-K14888712	0.0187924	0.0077611	-0.00258399	0.0359807	-0.00357302	-	-
BRD-K40628295	0.0187903	-0.00578717	0.00537907	0.0339566	0.00403212	-	-
BRD-K19766710	0.0187885	0.00170963	0.00443681	0.0343006	-0.00287007	-	-	2.65884
baricitinib	0.0187851	-0.00270921	0.00568347	0.0226576	0.0119384	-	-	4.27224
BRD-K01281780	0.0187832	0.00637475	0.00102717	0.0212744	0.00889011	SSTR4, GBA	Somatostatin receptor agonist	3.21147
BRD-K43388152	0.0187812	0.00313361	0.000895	0.0233296	0.0102041	-	-	3.82617
BRD-K75856618	0.018777	0.00331037	-0.00195103	0.0271147	0.00907987	-	-	2.50192
BRD-K11914584	0.0187735	0.0088857	-0.00559994	0.0335248	0.000736368	-	-	4.31282
BRD-K59134391	0.0187698	0.00814017	0.000404914	0.033992	-0.00499745	HRH1	Histamine receptor antagonist	4.68591
BRD-K27117623	0.0187615	0.00473584	0.000936313	0.0279796	0.00387118	-	-	2.9352
BRD-K85284710	0.0187594	0.00959173	0.00397521	0.0107639	0.013188	-	-	4.62724
BRD-K64132098	0.0187579	0.00248426	0.00416443	0.0337386	-0.00287146	CYP2C9, SLC12A1	Sodium/potassium/chloride transporter inhibitor	4.47522
BRD-K89692527	0.018757	0.00415216	0.000885192	0.0238313	0.00864534	-	-	3.61561
BRD-K45735142	0.018757	0.0115149	0.00175293	0.027356	-0.00310989	-	-	4.63074
BRD-A47416464	0.0187564	0.00522581	-0.00163471	0.035841	-0.0019193	-	-	3.07231
WP-1130	0.0187561	-0.0049083	-0.0008165	0.0295918	0.0136452	-	-
BRD-K17582293	0.0187529	0.00532311	0.00563437	0.0177475	0.00880087	-	-	3.3746
BRD-K69350885	0.0187521	-0.003472	0.00073536	0.0362918	0.00394902	-	-	3.697
BRD-K01676126	0.0187503	0.0105049	0.00646713	0.0122722	0.00825651	-	-	3.34743
BRD-K89891928	0.0187467	0.0052369	0.0045306	0.034714	-0.00698801	-	-	4.98586
BRD-K17753780	0.0187421	0.00072629	0.00240062	0.02647	0.00788726	GABRA6, GABRA5, GABRA3	GABA receptor modulator	4.01152
BRD-K63603058	0.0187412	0.00356997	-0.000556526	0.0361389	-0.00166991	-	-
BRD-K78397696	0.0187407	0.00473867	0.00374783	0.0266467	0.00234815	-	-	2.66819
BRD-A17718497	0.0187358	-0.00234558	0.000283815	0.0328677	0.00666561	-	-	3.68275
BRD-K02788568	0.0187344	0.00954795	-0.00235302	0.0236669	0.00660699	-	-	3.21558
BRD-K39107553	0.0187324	0.00193948	0.00667146	0.0228293	0.00602457
[truncated: 31,611 more rows]

## Sheet: Supplementary Table 9
Supplementary Table 9. Results of enrichment of small molecule mechanisms of action in the drug prioritization based on s1 (IRS2, RMND5B).
MOA	ES	NES	NOM p-val	FDR q-val	FWER p-val	Lead drugs
Carbonic anhydrase inhibitor	0.7001962981399598	1.7531229444742364	0.0093141405588484	0.4101151727591386	0.299	diclofenamide;topiramate;brinzolamide;metolazone;benzthiazide;methazolamide;acetazolamide
Sodium channel blocker	0.5179755307902857	1.698232864181738	0.0056	0.3996932899349023	0.4935	disopyramide;tocainide;phenacemide;quinidine;BRD-K56658166;mexiletine;ranolazine;vinpocetine;ivabradine;zonisamide;lacosamide;lupanine;procainamide;triamterene;ambroxol
CDK inhibitor	0.519190455950954	1.6543490788094988	0.0115651503469545	0.4339634451677516	0.684	dinaciclib;BMS-387032;AT-7519;alvocidib;CGP-60474;kenpaullone;BMS-265246;BRD-K71726959;roscovitine;PHA-793887;BS-181;NSC-693868;palbociclib;BML-259;Ro-3306;aloisine
Retinoid receptor agonist	0.5522341215447562	1.6462862847159552	0.0179591836734693	0.3577240861291937	0.7205	bexarotene;acitretin;CD-1530;AM-580;alitretinoin;TTNPB;isotretinoin;AC-55649;tretinoin
PPAR receptor agonist	0.4910175093642366	1.5823183914641947	0.0153964588144726	0.5542188282423636	0.914	efatutazone;troglitazone;rosiglitazone;carbacyclin;nTZDpa;clofibric-acid;GW-501516;L-2167;pioglitazone;oleoylethanolamide;farnesol;pterostilbene;GW-1929;L-165041;BRD-K14609189;fenofibrate;clofibrate
FAAH inhibitor	0.7841291564136732	1.5718056674750769	0.0216998191681736	0.5154606910365548	0.9365	PF-3845;PF-750
Angiotensin receptor antagonist	0.608460936173076	1.569575191816729	0.028262676641729	0.450997925459618	0.939	eprosartan;candesartan;ZD-7155;olmesartan-medoxomil;candesartan-cilextil;telmisartan;irbesartan;azilsartan-medoxomil
Progesterone receptor antagonist	0.8372751860899809	1.5689702393167897	0.010752688172043	0.3970878192288432	0.9395	levonorgestrel;mifepristone
GSK-3 inhibitor	0.6385208905294815	1.5395714700901153	0.0377516778523489	0.4698923385077617	0.9825	TWS-119;AR-A014418;SB-415286;SB-216763;kenpaullone
Osteoclast inhibitor	0.8883426731452161	1.5138979473032883	0.0140449438202247	0.5310653480220331	0.991	zoledronic-acid;risedronate
Calcium channel blocker	0.4481627646388537	1.5055817666764706	0.0306513409961685	0.5217086994127554	0.994	benidipine;isradipine;nilvadipine;nitrendipine;ryanodine;nimodipine;BRD-K56658166;nifedipine;gabapentin
Telomerase inhibitor	0.9809983616628284	1.500809263698305	0.0009182736455463	0.4995461942914371	0.996	BIBR-1532
Insulin sensitizer	0.5980384015986383	1.490071043150449	0.0592105263157894	0.5092205616116482	0.9995	troglitazone;rosiglitazone;balaglitazone;GW-501516;pioglitazone;azilsartan-medoxomil
Non-nucleoside reverse transcriptase inhibitor	0.8720195197141927	1.4899038620544247	0.0194085027726432	0.473451248301023	0.9995	delavirdine
DNA inhibitor	0.7445043711733458	1.4742432143118531	0.0403225806451612	0.5118928392588884	1.0	metronidazole;estramustine-phosphate
PARP inhibitor	0.5250136137246141	1.457685262115323	0.0628480509148766	0.5619366549824737	1.0	veliparib;CS-1657;olaparib;endo-IWR-1;iniparib;hypoxanthine;rucaparib
Angiogenesis inhibitor	0.8530911141326105	1.4547730827697531	0.0378429517502365	0.5438930454505287	1.0	angiogenesis-inhibitor;pomalidomide
MEK inhibitor	0.5262006385448089	1.452733487028014	0.0682926829268292	0.5230032548823235	1.0	trametinib;PD-184352;PD-0325901;selumetinib;PD-198306;AS-703026;refametinib;U-0126
Thromboxane receptor antagonist	0.7666051660516604	1.439440868373563	0.0531053105310531	0.5574150699733811	1.0	torasemide;GR-32191;SQ-29548;picotamide
Cell cycle inhibitor	0.7657591293253699	1.435966363576121	0.0569620253164556	0.5466136705057587	1.0	BMS-387032;AT-7519
Xanthine oxidase inhibitor	0.7545232710391621	1.4299597030873634	0.0640569395017793	0.5498515630588741	1.0	topiroxostat;oxypurinol;febuxostat;allopurinol
Angiotensin converting enzyme inhibitor	0.4751597716179717	1.4219466846462832	0.0761300555114988	0.5639595757272272	1.0	fosinopril;benazepril;quinapril;ramipril;zofenopril-calcium;captopril;rescinnamine;cilazapril;enalaprilat;enalapril;lisinopril
Protein kinase inhibitor	0.6587389118220337	1.409263074144915	0.0907519446845289	0.6019953843809193	1.0	C-1;PD-0325901;AT-9283;MLN-8054
Prostanoid receptor antagonist	0.518582136274792	1.406703573140526	0.0878210439105219	0.5886955433149724	1.0	indoprofen;DG-041;L-161982;mesalazine;aceclofenac;phenylbutazone;salicylic-acid;SC-19220;meclofenamic-acid;laropiprant;ramatroban
MCL1 inhibitor	0.9328393739213235	1.4052555827944804	0.0211055276381909	0.5725613420130196	1.0	BMS-387032;gossypol
Vitamin D receptor agonist	0.5592454727365925	1.4051729849938834	0.0931372549019607	0.5507780902122414	1.0	paricalcitol;calcipotriol;ercalcitriol;alfacalcidol;maxacalcitol;seocalcitol
Leukotriene receptor antagonist	0.5800778698389224	1.4010678804085437	0.1019708654670094	0.5486563178100484	1.0	REV-5901;ibudilast;ketotifen;tomelukast
Glucocorticoid receptor antagonist	0.8213206579976933	1.395971907775848	0.0591446769790718	0.5510922633950927	1.0	levonorgestrel;mifepristone
DNA alkylating agent	0.6846720400324524	1.3707581909650854	0.1027457927369353	0.6498476162519641	1.0	estramustine-phosphate;temozolomide;ifosfamide
Dopamine receptor agonist	0.4110005874517853	1.369313999581157	0.0873196659073652	0.6356597396094141	1.0	SKF-77434;fenoldopam;dopamine;BP-897;ABT-724;dihydrexidine;L-stepholidine;mesulergine;SKF-81297;amineptine
Sulfonylurea	0.8009589767211759	1.3678496176755657	0.0817084493964716	0.622423554686869	1.0	glipizide
Dipeptidyl peptidase inhibitor	0.5540309157168319	1.367276980608653	0.1209610604805302	0.6055078711817726	1.0	alogliptin;PT-630;NVP-DPP728;diprotin-a
Benzodiazepine receptor agonist	0.5220931732179048	1.3669580437316906	0.113036303630363	0.5887638275595211	1.0	lorazepam;CGS-20625;chlordiazepoxide;FGIN-1-43;nitrazepam;diazepam;zaleplon;ZK-93423
Focal adhesion kinase inhibitor	0.8982324584895554	1.3655283343393343	0.0403146509341199	0.5777268844443136	1.0	PF-562271;defactinib
Caspase inhibitor	0.5750794343542641	1.3541699284251218	0.1148365465213746	0.609684169110809	1.0	SA-94315;EMF-BCA1-57;ivachtin;VX-765;ursolic-acid;EMF-BCA1-64
FXR agonist	0.6754731898083806	1.3534393218283385	0.1143359718557607	0.5958781922884326	1.0	GW-4064;WAY-362450;farnesol;fexaramine
HIV protease inhibitor	0.6224778188658693	1.3424011860751528	0.1421143847487001	0.6319208542543545	1.0	indinavir;efavirenz;nelfinavir
Serotonin reuptake inhibitor	0.4367397376202668	1.3416790769605602	0.1161858974358974	0.6193978467701552	1.0	dosulepin;citalopram;nefazodone;venlafaxine;trazodone;zimelidine;tramadol;minaprine
Acetylcholinesterase inhibitor	0.4355069949193234	1.3396468993177644	0.107896794370602	0.6142194060321251	1.0	tacrine;phenserine;galantamine;neostigmine;ethoprop
Macrophage inhibitor	0.988722587556164	1.3386846099563023	0.0242013552758954	0.604060778668002	1.0	BMS-777607
Sterol demethylase inhibitor	0.774951444874455	1.333422953076148	0.102820746132848	0.6213970345762546	1.0	fluconazole;enilconazole
Aldehyde dehydrogenase activator	0.9920552265896986	1.3277343406492064	0.0204081632653061	0.6503684097574934	1.0	alda-1
NADH-ubiquinone oxidoreductase (Complex I) inhibitor	0.9991073288303032	1.3225684185205469	0.0010090817356205	0.6814640565499412	1.0	deguelin
Niacinamide phosphoribosyltransferase inhibitor	0.989525991608891	1.320050145080046	0.0201612903225806	0.6887404971093003	1.0	FK-866
SARS coronavirus 3C-like protease inhibitor	0.9875323593299016	1.3193506119933294	0.0215264187866927	0.6795943915873811	1.0	betulinic-acid
Cholesterylester transfer protein inhibitor	0.9791412503347516	1.314346920682705	0.0389221556886227	0.7096800091441511	1.0	dalcetrapib
PKC inhibitor	0.5225727620811141	1.310389250488307	0.1701592623637887	0.7301790451634899	1.0	enzastaurin;CGP-53353;sotrastaurin;PKCbeta-inhibitor
TRPA1 channel blocker	0.9889903889070728	1.309598302431273	0.0270009643201542	0.7219853217325989	1.0	HC-030031
TGF beta receptor inhibitor	0.6452275560366824	1.3069076913336997	0.15	0.7310608770298305	1.0	LY-364947;D-4476;pirfenidone;SB-431542
GABA benzodiazepine site receptor agonist	0.981283661142024	1.3037817890045738	0.0317145688800792	0.7423422633950927	1.0	clonazepam
MRP inhibitor	0.9811051269080844	1.3034771250899049	0.0286561264822134	0.7302056025214292	1.0	dofequidar
Nitric oxide synthase inhibitor	0.5786538889836743	1.3032542424336155	0.1601049868766404	0.7177015523284928	1.0	diphenyleneiodonium;asymmetrical-dimethylarginine;proadifen
Vitamin K antagonist	0.7008697546996987	1.3028294332153836	0.1417040358744394	0.7077739250385011	1.0	warfarin;phenindione
Cyclooxygenase inhibitor	0.3293325179905633	1.302638065528049	0.1018258426966292	0.696106659989985	1.0	nepafenac;talniflumate;oxaprozin;tenoxicam;fenbufen;valdecoxib;ibuprofen-piconol;lornoxicam;indoprofen;piroxicam;DUP-697;bromfenac;indobufen;eicosatetraynoic-acid;curcumin;lumiracoxib;tolmetin;iguratimod;carprofen;pterostilbene;nimesulide;sulindac;umbelliferone;mesalazine;etofenamate;deracoxib;triflusal;rofecoxib;paracetamol;mefenamic-acid;aminosalicylic-acid;metoxibutropate;aspirin;fentiazac;phe…
Cytochrome P450 inhibitor	0.441168214483552	1.301451458932877	0.1483606557377049	0.6929655847407475	1.0	cobicistat;myricetin;eriodictyol;resveratrol;clotrimazole;thiotepa
Ribonucleoside reductase inhibitor	0.7619722673391066	1.3003603012925022	0.1352833638025594	0.6888401799127263	1.0	hydroxyurea
JNK inhibitor	0.6351617130731955	1.2975313089755949	0.1784452296819788	0.6977472788129562	1.0	AS-601245;BI-78D3
Farnesyl pyrophosphate synthase inhibitor	0.9775046865236408	1.296901618629846	0.0555004955401387	0.6901073593148342	1.0	zoledronic-acid
Thyroid peroxidase inhibitor	0.9713154997470764	1.2934400358337057	0.0556117290192113	0.7031882569617137	1.0	propylthiouracil
Hepatocyte growth factor receptor inhibitor	0.7563799346332085	1.2918613366788323	0.1309751434034416	0.7027447421131697	1.0	BMS-777607
Barbiturate antiepileptic	0.9681911506531378	1.290511415154473	0.0637651821862348	0.7007550259815954	1.0	pentobarbital
Glutamate receptor antagonist	0.3588024442643086	1.2839684544442242	0.1282820705176294	0.7354014893307703	1.0	eliprodil;MDL-29951;topiramate;NBQX;L-701252;SYM-2206;SIB-1757;fenobam;MPEP;traxoprodil;YM-298198;perampanel;dizocilpine;SIB-1893;GYKI-52466;norketamine;BRD-A41630653
DOPA decarboxylase inhibitor	0.9639955961555629	1.2838038738861883	0.07465825446898	0.7248640818370412	1.0	benserazide
Proteasome inhibitor	0.6447170612463753	1.2816520453179254	0.1702317290552584	0.7281146328868302	1.0	ixazomib;carfilzomib
Urokinase inhibitor	0.9619722081709168	1.2796157669566726	0.080078125	0.7306671545780209	1.0	4-chlorophenylguanidine
Hemozoin biocrystallization inhibitor	0.963162436397179	1.2793499473971066	0.0618253189401373	0.7213376883507079	1.0	quinine
TIE tyrosine kinase inhibitor	0.957776653673342	1.2740165081851675	0.097165991902834	0.7455745184941591	1.0	rebastinib
Bromodomain inhibitor	0.9503079715535454	1.2731032557472788	0.0946372239747634	0.7405750169371705	1.0	I-BET-762
Chloride channel agonist	0.9518850239533432	1.27247113196781	0.0873015873015873	0.7337854607998954	1.0	alfaxalone
Trace amine associated receptor agonist	0.9484928735084952	1.2690135687062905	0.1079365079365079	0.7453135059732455	1.0	hydroxyamphetamine
Bacterial cell wall synthesis inhibitor	0.7465323269948506	1.2660626703967572	0.1493087557603686	0.7536683546446431	1.0	cefadroxil;nafcillin
Estrogen receptor agonist	0.4047713904504391	1.2610124795743072	0.1745173745173745	0.7741612418627941	1.0	dienestrol;levonorgestrel;tibolone;estramustine-phosphate;GR-235;DY-131;estrone;equilin;equol;alpha-estradiol
Kainate receptor antagonist	0.7434607945246242	1.26005590530408	0.1545623836126629	0.7687961737126239	1.0	topiramate;GYKI-52466;SYM-2081
Monoamine oxidase inhibitor	0.4180566241423951	1.2586138356003735	0.1674718196457326	0.7669637902800147	1.0	harmane;hymecromone;pirlindole;eprobemide;methylene-blue;safinamide;selegiline;lazabemide;tranylcypromine
Androgen receptor modulator	0.6279712779583783	1.2581433456221034	0.1897616946160635	0.7595468202303455	1.0	ostarine;enobosarm
Aspartate carbamoyltransferase inhibitor	0.9449519445353648	1.256053806849338	0.098703888334995	0.7622947579263633	1.0	sparfosic-acid
Leukotriene inhibitor	0.6675990953457924	1.254912068412049	0.1946428571428571	0.7588476871150882	1.0	quiflapon;KIN001-055;ubenimex;zileuton
Mineralocorticoid receptor antagonist	0.665391989007365	1.252224361159834	0.1862312444836716	0.7647986402680944	1.0	potassium-canrenoate
Leucine rich repeat kinase inhibitor	0.7273322422258592	1.2516975815349891	0.1903460837887067	0.7581340364977847	1.0	GW-5074;XMD-1150;XMD-885
DNA repair enzyme inhibitor	0.9295682447109233	1.2509546440596595	0.1335311572700296	0.7529669504256384	1.0	fludarabine-phosphate
Tau aggregation inhibitor	0.9393281161662748	1.2495180945347133	0.1146744412050534	0.7518569520948089	1.0	methylene-blue
Tripeptidyl peptidase inhibitor	0.9410241913886987	1.246676191172882	0.1351626016260162	0.7581868229173028	1.0	butabindide
Beta-catenin inhibitor	0.816142332699018	1.2440972786814428	0.172147001934236	0.7637600979782927	1.0	PNU-74654
Phospholipase activator	0.8173283887251601	1.2438141969305383	0.1578947368421052	0.7561967951927893	1.0	m-3M3FBS
GABA receptor positive allosteric modulator	0.9265034070282976	1.2417681188050314	0.1336032388663967	0.7583750625938909	1.0	CGP-7930
Vitamin B	0.7304567772652878	1.2400347671712786	0.1788990825688073	0.7593366794377613	1.0	thiamine;niacin;cyanocobalamin
Adrenergic inhibitor	0.7365282575783969	1.238376230423936	0.1659152389540126	0.7593955588555247	1.0	nefazodone;venlafaxine
Neprilysin inhibitor	0.814318871630066	1.234241928455612	0.1598440545808966	0.772717314608276	1.0	KBG;sacubitril
RAD51 inhibitor	0.914184544886482	1.2320811202370412	0.1710398445092322	0.7753906140109039	1.0	amuvatinib
Calcium sensitizer	0.8087142101498681	1.2318196762120528	0.1762452107279693	0.7680520781171758	1.0	levosimendan
Electrolyte reabsorption inhibitor	0.9240634391644598	1.2302836595344229	0.1637426900584795	0.7675297286589224	1.0	torasemide
GABA receptor antagonist	0.4587576467081622	1.2299080830670484	0.2164948453608247	0.7610056388931223	1.0	picrotoxin;clomethiazole;gabazine;butalbital;securinine;NCS-382;CGP-55845;CGP-52432
GABA receptor agonist	0.432313830760931	1.2284415075115018	0.2043443282381335	0.7604249115608896	1.0	propofol;fenigam;alfaxalone;zopiclone
Antiarrhythmic	0.9200761746064808	1.2274569522022682	0.1514841351074718	0.7572255990368532	1.0	propafenone
Ionotropic glutamate receptor antagonist	0.8267515905476501	1.2273667639483898	0.1758989310009718	0.7496817594813273	1.0	CO-101244
PPAR receptor partial agonist	0.922486386764662	1.2260134562186973	0.1639676113360323	0.7486327146970455	1.0	balaglitazone
Androgen biosynthesis inhibitor	0.8113450735018328	1.2240923271633295	0.1924227318045862	0.7499980641064689	1.0	abiraterone
Serum/glucocorticoid regulated kinase inhibitor	0.9218317612402178	1.2240107438624623	0.1533203125	0.7427531603527742	1.0	GSK-650394
Potassium channel activator	0.4813819162349303	1.2194344278393732	0.229064039408867	0.7576762871580097	1.0	Y-26763;BMS-191011;pinacidil;P-1075;Y-27152;levcromakalim
Thymidine phosphorylase inhibitor	0.9133811408337548	1.217624814153096	0.1638830897703549	0.7587356034051077	1.0	tipiracil
Enkephalinase inhibitor	0.9018061713333532	1.2158563175550872	0.1783181357649442	0.7594783264004917	1.0	racecadotril
Lipoprotein lipase activator	0.9159103758145624	1.2156199326853	0.1762336354481369	0.7530873516156587	1.0	gemfibrozil
Dimethylarginine dimethylaminohydrolase inhibitor	0.9046032076650696	1.2083517812746165	0.1944718657453109	0.7807250924931086	1.0	asymmetrical-dimethylarginine
Oxazolidine antiepileptic	0.9005266759901212	1.2071058018240652	0.1782868525896414	0.7790899089018142	1.0	trimethadione
HCN channel blocker	0.7949805023093943	1.2056225536641056	0.207492795389049	0.7782423635453181	1.0	zatebradine
Lysophosphatidic acid receptor antagonist	0.9138869878299164	1.2046408627964045	0.1817258883248731	0.77538595629293	1.0	KI-16425
Mitotic inhibitor	0.7807236802951854	1.2020408735727737	0.2161383285302593	0.7801696703934407	1.0	AT-9283;MLN-8054
SERT inhibitor	0.7799196600336046	1.2019653735209126	0.2127659574468085	0.7732536304456684	1.0	clomipramine
Uricosuric blocker	0.7886389335237755	1.1991852405702563	0.2181146025878003	0.7783412504077216	1.0	sulfinpyrazone;probenecid
GGTase inhibitor	0.9002588746392121	1.1989119876619057	0.2005958291956306	0.7724330814403423	1.0	GGTI-298
Melatonin receptor antagonist	0.7947654890776119	1.1951679127516313	0.2125237191650854	0.7821055908186604	1.0	4-P-PDOT
Tumor necrosis factor release inhibitor	0.788090125020405	1.192019086397622	0.2218148487626031	0.7889395477144288	1.0	CPI-1189
Adenosine receptor antagonist	0.3803608661094445	1.189637508863168	0.2305271439811172	0.7924469669105428	1.0	MRS-1334;MRS-1754;etofylline;DPCPX;doxofylline;SLV-320
IP receptor activator	0.785603761233113	1.1891238869137042	0.2353545734840698	0.7877539994201829	1.0	carbacyclin;BMY-45778
HCV inhibitor	0.6425939229590775	1.1887519899181067	0.2680505415162454	0.7824323441684266	1.0	BML-257;embelin
SREBP inhibitor	0.8973130597792127	1.1872102811402667	0.2053663570691434	0.7819180279039247	1.0	fatostatin
Ribonucleotide reductase inhibitor	0.7045861044838833	1.187163687340827	0.235626767200754	0.7754660837409961	1.0	trimidox;cytarabine
Calcitonin antagonist	0.6926569076346601	1.1856234014262244	0.2473933649289099	0.7754300942939834	1.0	MK-3207
RIPK inhibitor	0.8846966405808314	1.1837162942822683	0.2515151515151515	0.7771084147229248	1.0	necrostatin-1
Collagenase inhibitor	0.8910941172969917	1.1807341185796392	0.2333333333333333	0.7832279669504257	1.0	PD-166793
Insulin secretagogue	0.5264174945082019	1.1790065193732189	0.2640350877192982	0.7839946903826814	1.0	gliclazide;glimepiride;repaglinide;nateglinide
Alkaline phosphatase inhibitor	0.880530841788913	1.177659381285492	0.252	0.7832481303923099	1.0	BRD-K54331210
Luteinizing hormone releasing hormone agonist	0.870860237450531	1.1752374670610204	0.2289156626506024	0.7869334489539187	1.0	goserelin
Porcupine inhibitor	0.6921886624014283	1.1740937916314518	0.26497277676951	0.7851121440224854	1.0	wnt-c59;LGK-974;IWP-L6
GLI antagonist	0.8735084952539649	1.1681568645936415	0.2565922920892495	0.8031632448673011	1.0	GANT-58
CAMP stimulant	0.8730026482578035	1.1678897522691682	0.2477962781586679	0.7978619715287216	1.0	bucladesine
Hydantoin antiepileptic	0.6868541682475442	1.1637560174930943	0.2836363636363636	0.8083069486118942	1.0	mephenytoin;phenytoin
ATP channel activator	0.7748021186692852	1.1632277887936515	0.261116367076632	0.8041045943915873	1.0	pinacidil;P-1075
Cholinergic receptor antagonist	0.6159338487982933	1.161638155064791	0.3052064631956912	0.8044348499493427	1.0	nitrocaramiphen;pipenzolate
ABC transporter expression enhancer	0.7647443908825804	1.1586631920399135	0.2663461538461538	0.8097824621547706	1.0	T-0901317;GW-3965
Adenosine receptor agonist	0.4429639507091191	1.1558798049573595	0.2908204711616572	0.8145495915629168	1.0	hemado;regadenoson;bucladesine;CV-1808;IB-MECA;SDZ-WAG-994;CGS-21680
Thiazide diuretic	0.6716937100288589	1.1522189863583967	0.2944393801276208	0.82279954021942	1.0	quinethazone
Acetylcholine receptor agonist	0.4026436640322474	1.1483908062949106	0.272289156626506	0.8312727549971574	1.0	varenicline;bethanechol;SR-95639A;BRD-K47448802;aceclidine;decamethonium
DeltaF508-CFTR Corrector	0.8609813431725534	1.14626231337749	0.2833168805528134	0.8333680558150659	1.0	glafenine
Free fatty acid receptor agonist	0.8658910346058857	1.1453695748906731	0.2781124497991968	0.8305917209147055	1.0	GW-9508
Glycosyl transferase inhibitor	0.8463117802838694	1.1445526158188015	0.2754491017964072	0.8274378479483931	1.0	miglustat
Inhibitor of translocation of PKCq in T cells	0.8500907549022525	1.1445369655320132	0.2814070351758794	0.8214516117241556	1.0	TER-14687
Tyrosine phosphatase inhibitor	0.5688139720675071	1.1431671145347724	0.3275563258232236	0.820605908863295	1.0	BRD-K86682249;dephostatin;ursolic-acid
Motilin receptor agonist	0.759770705008372	1.1405410011585893	0.2658349328214971	0.8244655652543563	1.0	camicinal
NFkB pathway activator	0.749419746473844	1.138308586068305	0.2908438061041292	0.8267007654338652	1.0	betulinic-acid;farnesol
IMPDH inhibitor	0.6745055189890853	1.1376494610461192	0.3161350844277673	0.823134968410062	1.0	merimepodib;AVN-944
Phenylalanine 4-hydroxylase stimulant	0.854316065105484	1.131174992484342	0.2777222777222777	0.8356770295303094	1.0	tetrahydrobiopterin
Nitric oxide synthase stimulant	0.854316065105484	1.131174992484342	0.2777222777222777	0.8356770295303094	1.0	tetrahydrobiopterin
Hexokinase inhibitor	0.8450917963519504	1.1310072178621433	0.2779960707269155	0.8304683587881823	1.0	BRD-K92980438
ATP citrase lyase inhibitor	0.8484244353854852	1.129797396030648	0.3008130081300813	0.8290262980677914	1.0	CHEMBL-399379
Imidazoline ligand	0.8399738149790222	1.1280934811372978	0.309989701338826	0.8293557630966999	1.0	clotrimazole
Vesicular monoamine transporter ligand	0.8441396137709406	1.1243955714877092	0.3183183183183183	0.8310480924088837	1.0	lobelanidine
Dopamine receptor modulator	0.8441396137709406	1.1243955714877092	0.3183183183183183	0.8310480924088837	1.0	lobelanidine
Thyroid hormone stimulant	0.6058304665942494	1.1232150422177138	0.3469921534437663	0.8295765796345524	1.0	liothyronine
Antioxidant	0.6502603779199525	1.1210610094579632	0.3397790055248619	0.8316474712068103	1.0	ascorbic-acid;benfotiamine;rutin
NAD precursor with lipid lowering effects	0.8393489451602345	1.1209684928989123	0.3055555555555556	0.8265241405154089	1.0	niacin
Histone acetyltransferase inhibitor	0.8423245157258904	1.1197580601950472	0.3346007604562737	0.8254894677542629	1.0	curcumin
CSF1R inhibitor	0.8422352486089207	1.1187127723897838	0.3307086614173228	0.823713511443636	1.0	WZ-7043
Secretory phospholipase inhibitor	0.8374445799982146	1.117089946398346	0.3283132530120481	0.8239579336537274	1.0	varespladib
NTPDase inhibitor	0.7337677795631732	1.116327809341138	0.3509749303621169	0.8212298286138885	1.0	PSB-069;PSB-06126
Apelin receptor antagonist	0.8325943999761954	1.116269740173768	0.312	0.8161785948152999	1.0	BRD-K55186349
Breast cancer resistance protein inhibitor	0.832148064391347	1.1154644749490354	0.3439048562933597	0.8137464955394875	1.0	KO-143
CAR agonist	0.73826101997541	1.113474491327751	0.3467583497053045	0.8154454783440984	1.0	TCPOBOP
IL5 inhibitor	0.8416698902014461	1.1131693309401174	0.3410931174089069	0.8114648387675854	1.0	YM-90709
ROR inverse agonist	0.732607272510861	1.1098398315438418	0.3442622950819672	0.817726981096645	1.0	T-0901317;BRD-K20401833
Structural glycoprotein antagonist	0.7299291793132179	1.1092313292784015	0.3415326395458846	0.8147158626137965	1.0	tirofiban;DU-728
RNA polymerase inhibitor	0.6521286430186003	1.1081509782776222	0.3624288425047438	0.813185055360819	1.0	dactinomycin
Norepinephrine reuptake inhibitor	0.4854210692863473	1.101959094983873	0.3376736111111111	0.8282796126705395	1.0	dosulepin;nefazodone;venlafaxine
CRF receptor antagonist	0.8345285208438717	1.095860651576663	0.3717693836978131	0.8431145193399856	1.0	NBI-27914
Sphingosine kinase inhibitor	0.6496652283886326	1.0955292724334051	0.3622119815668203	0.8389675422224246	1.0	SKI-II;PF-543;ABC-294640
Hedgehog pathway inhibitor	0.8201862707174101	1.095336600401049	0.3676042677012609	0.8345243769268361	1.0	vismodegib
Anti-cancer agent	0.5905646184179001	1.092927884906428	0.3837209302325581	0.83766030782701	1.0	flavokavain-b
Succinimide antiepileptic	0.818698485434582	1.0926870986639	0.3655913978494624	0.8334153015237141	1.0	ethosuximide
Gamma secretase inhibitor	0.8228047728151872	1.0904436025673128	0.37435367114788	0.8355473298705454	1.0	JLK-6
MAP kinase inhibitor	0.4937337410600397	1.0887135679329516	0.3673986486486486	0.8361928922795959	1.0	PD-0325901;XMD-892;PD-198306;XMD-885;CGP-57380
Steroidogenic factor antagonist	0.7165387133250014	1.0868886410908007	0.3737185461323392	0.837166934612445	1.0	BRD-A17664363;SID-7969543
Glucose dependent insulinotropic receptor agonist	0.637816985216777	1.0851644386602344	0.3848396501457726	0.8378610794098125	1.0	oleylethanolamide;oleoylethanolamide
NAMPT inhibitor	0.7108254478366959	1.0850271877276323	0.3817307692307692	0.8334868632428412	1.0	GMX-1778;CAY-10618
TP53 inhibitor	0.7116288757959888	1.084950996906476	0.3809963099630996	0.828926579524459	1.0	pifithrin-alpha;PRIMA1
Lipid peroxidase inhibitor	0.7096351841932989	1.0838223538162213	0.375366568914956	0.8278435510408471	1.0	anisodamine;ursolic-acid
Protein tyrosine kinase activator	0.8087303240396346	1.083231538003475	0.3686313686313686	0.8249259542723176	1.0	SC-9
Apoptosis stimulant	0.5815437606868913	1.0829325762667488	0.3907342657342657	0.8213252081512099	1.0	betulinic-acid
Glutamate receptor negative allosteric modulator	0.8053381735947867	1.0728501017571506	0.3980952380952381	0.8475778977454946	1.0	dipraglurant
Bone resorption inhibitor	0.4999724531787815	1.070789801954375	0.3841463414634146	0.8493921049171522	1.0	zoledronic-acid;pamidronate;etidronic-acid
GABA receptor modulator	0.4172666434835007	1.0700118440204198	0.3761316872427983	0.8469954932398599	1.0	pentobarbital;CGP-7930;clomethiazole;tracazolate
Dopamine reuptake inhibitor	0.6199457825565795	1.0571258257779466	0.4212007504690431	0.8809844601155877	1.0	diclofensine
Mitochondrial Na+/Ca2+ exchanger antagonist	0.7904305650608504	1.056344945080757	0.4098522167487685	0.8784096474381903	1.0	CGP-37157
HCN channel antagonist	0.7973041330675157	1.0557558484473173	0.4062816616008105	0.875499724997332	1.0	ivabradine
Dihydropyrimidine dehydrogenase inhibitor	0.7917100604040825	1.052302649971256	0.4068627450980392	0.8810593607803009	1.0	gimeracil
Aromatic L-amino acid decarboxylase inhibitor	0.7857589192727704	1.0521137917167276	0.4185149469623915	0.8768754483075966	1.0	carbidopa
Sodium/glucose cotransporter inhibitor	0.489618791013966	1.0515971380922366	0.4112399643175736	0.873708748606781	1.0	dapagliflozin
Estrogen receptor antagonist	0.4302802085556189	1.049706234044688	0.4028239202657807	0.8746789971052835	1.0	BRD-A83255679;fulvestrant;PHTPP
Glutamate receptor agonist	0.4391418059418037	1.049015287455802	0.4105793450881612	0.871875299651605	1.0	aniracetam;L-glutamic-acid;ampalex
Smoothened receptor agonist	0.7901925194155979	1.0473231173979063	0.4399596367305752	0.8718613634737821	1.0	purmorphamine
Bradykinin receptor antagonist	0.7905793435891332	1.0460612869708856	0.4281553398058252	0.8707564636428327	1.0	noscapine
Local anesthetic	0.6988037850383861	1.045430625602654	0.4263414634146341	0.867934755536446	1.0	benzonatate;prilocaine
G protein-coupled receptor agonist	0.6058919803600655	1.041359512777069	0.4621141253507951	0.8750596598022032	1.0	GW-9508;SB-756050;taurocholic-acid
Fibroblast growth factor inhibitor	0.7876930401404468	1.0400194075561486	0.4478527607361963	0.874460330391961	1.0	palomid-529
Estrogen-related receptor agonist	0.7753444222929746	1.0397820885769682	0.4494047619047619	0.8706264938645081	1.0	DY-131
RNA synthesis inhibitor	0.611551708073055	1.0372737832525076	0.4527089072543618	0.8731038865991294	1.0	fluorouracil;daunorubicin
HIV integrase inhibitor	0.5582017369247576	1.0372613090574916	0.4508928571428571	0.8686808912348114	1.0	betulinic-acid
Enoyl-acyl-carrier protein reductase inhibitor	0.6814101281527336	1.031174047821251	0.4776119402985074	0.8812803596257329	1.0	triclosan
PDGFR inhibitor	0.3217713748180438	1.0281609459408203	0.4193792581377744	0.885535689898484	1.0	motesanib;linifanib;DMBI;imatinib;amuvatinib;sorafenib;vatalanib;orantinib;axitinib
P38 MAPK inhibitor	0.3547662025591033	1.025914453145018	0.4328832406671962	0.8873193584346369	1.0	LY-364947;doramapimod;ML-3163;PH-797804;VX-745;TAK-715;losmapimod;SC-68376;SB-239063;SB-203580;JX-401;VX-702
C-Met inhibitor	0.5513534482873181	1.0234358487388295	0.4556159420289855	0.8899273910866301	1.0	BMS-777607
Retinoid receptor ligand	0.672112122835208	1.02138412982008	0.4832535885167464	0.8911277363806903	1.0	tretinoin;retinol
Anti-amyloidogenic agent	0.6684726477650313	1.0210242758017571	0.4725697786333012	0.8876895169486904	1.0	JLK-6
Adenosine kinase inhibitor	0.6641712746002533	1.020471078180098	0.4751908396946565	0.8849206691811117	1.0	5-iodotubercidin
Dopamine-norepinephrine reuptake inhibitor	0.7601392567024727	1.0203876749910914	0.4763779527559055	0.8808258343397448	1.0	methylphenidate
GABA uptake inhibitor	0.5456062469676337	1.017281417298057	0.4569597069597069	0.8846989997190907	1.0	tiagabine;stiripentol
Thymidylate synthase inhibitor	0.4022377583912767	1.0150466541983665	0.4361610968294773	0.8862948549037148	1.0	5-FP;fluorouracil;tegafur;pemetrexed
Glucose 6-phosphate dehydrogenase inhibitor	0.7649299253131788	1.0128251024507406	0.4919678714859438	0.8879514924560755	1.0	BRD-K98404142
Cannabinoid receptor inverse agonist	0.5391530861558523	1.0080142027794827	0.495188101487314	0.8965392198875235	1.0	JTE-907;SR-144528;taranabant
ATP channel blocker	0.5302260070444031	1.0056048781430733	0.493838028169014	0.8986808562125486	1.0	tolbutamide;gliclazide
Glutamate receptor modulator	0.3955929656211611	1.0036332039110856	0.473109243697479	0.8996915015380215	1.0	mibampator;VU-0404997-2;cyclothiazide;VU-0415374-1;VU-0400071-3;DMeOB
Phosphoinositide dependent kinase inhibitor	0.7571636861368167	1.002986785203989	0.5198451113262342	0.8971442946410136	1.0	KIN001-244
Kelch-like ECH-associated protein ligand	0.5875316173188515	1.0020031252083597	0.5121951219512195	0.8953465575722074	1.0	BRD-K93367411;BRD-K98948170;dimethyl-fumarate
Anti-malarial agent	0.7541881155711607	1.0019418311982575	0.4960238568588469	0.8913070309689888	1.0	hydroxychloroquine
Diacylglycerol O acyltransferase inhibitor	0.6572636940784808	1.0016152129963032	0.4957507082152974	0.8880765657832544	1.0	betulinic-acid
MDM inhibitor	0.4270617577330352	1.0005024686148976	0.464471403812825	0.8867731830303595	1.0	AMG-232;nutlin-3
Fatty acid synthase inhibitor	0.6567577218353865	1.0004001045997484	0.5211141060197664	0.8829442079786346	1.0	cerulenin;pyrazinamide
Metalloproteinase inhibitor	0.4585034660593214	0.99743607569092	0.4871794871794871	0.8866219836667444	1.0	zoledronic-acid;PD-166793
Monoamine oxidase B inhibitor	0.7493974469604547	0.9972188177708284	0.510576923076923	0.8830717406384806	1.0	farnesol
Histone lysine demethylase inhibitor	0.7524027732317672	0.996215296542072	0.51252408477842	0.8816272353736083	1.0	GSK-J4
SIRT activator	0.6565052646878227	0.9961773449275756	0.5160075329566854	0.8776940979651295	1.0	resveratrol
Mitochondrial complex I inhibitor	0.7464516321004553	0.9956778066868336	0.5096359743040685	0.8750506982192745	1.0	rotenone
Dihydroorotate dehydrogenase inhibitor	0.5270756447078275	0.9923130631965752	0.5022706630336058	0.8795541284900323	1.0	teriflunomide;SC-12267;brequinar
RAF inhibitor	0.3816633009362034	0.9908351951273422	0.4628378378378378	0.8791845279129458	1.0	AZ-628;PLX-4720;GW-5074;sorafenib;regorafenib;vemurafenib
ARFGAP inhibitor	0.7372571190525783	0.9872343215590412	0.5138613861386139	0.8840341986193577	1.0	QS-11
Nitric oxide stimulant	0.6464061967637829	0.9818364492867504	0.5246971109040075	0.8936104156234351	1.0	tetrahydrobiopterin
Caspase activator	0.4232595430026626	0.9809270811474348	0.5058430717863105	0.8918773625039329	1.0	betulinic-acid;BRD-K30064966;amygdalin
Glucosidase inhibitor	0.4868017483836809	0.9801708778235328	0.5183566433566433	0.889879146914204	1.0	voglibose;castanospermine
Tyrosine kinase inhibitor	0.3393450248039972	0.977796492950105	0.5	0.8918665827688902	1.0	BMS-777607;purvalanol-b;CP-724714;GTP-14564;genistein
Phosphodiesterase inhibitor	0.2702541655073335	0.9762106055303312	0.4959941733430444	0.8918538834452552	1.0	T-0156;sildenafil;ibudilast;pentoxifylline;tadalafil;mirodenafil;papaverine;ketotifen;zaprinast;vinpocetine;rolipram;avanafil;cilostamide;MY-5445;PF-04447943
Collapsin response mediator protein inhibitor	0.7295801469931857	0.975967919747671	0.5308764940239044	0.8846687238650184	1.0	lacosamide
Collapsin response mediator protein stimulant	0.7295801469931857	0.975967919747671	0.5308764940239044	0.8846687238650184	1.0	lacosamide
Carboxamide antiepileptic	0.7300562382836908	0.9754708574559146	0.5370741482965932	0.8819943276984441	1.0	carbamazepine
Melanin inhibitor	0.6412240904715745	0.974171422489756	0.5540921919096896	0.8811900791100815	1.0	monobenzone
CLK inhibitor	0.5183893300486556	0.972516176549864	0.5406330196749358	0.8815073571896307	1.0	WZ-3105
Methylmalonyl CoA mutase stimulant	0.7304133067515697	0.9715254927951318	0.5522682445759369	0.8801438860418286	1.0	cyanocobalamin
Farnesyltransferase inhibitor	0.4776641523205711	0.9687135226353883	0.5192135835567471	0.8831626677304091	1.0	lonafarnib;FTI-276;arglabin
Hydroxycarboxylic acid receptor agonist	0.6393163359987051	0.9659982621742924	0.5683317624882187	0.8857471333582654	1.0	IBC-293
Insulin receptor ligand	0.7235397387449043	0.962658443481962	0.5707317073170731	0.8897419132901033	1.0	GSK-1904529A
Glucokinase activator	0.7219031749337935	0.9621436376704596	0.568762278978389	0.8871552621819758	1.0	Ro-28-1675
11-beta hydroxysteroid dehydrogenase inhibitor	0.7096140684976344	0.9570450419315576	0.5690168818272096	0.8920042408010357	1.0	ursolic-acid
Steryl sulfatase inhibitor	0.7096140684976344	0.9570450419315576	0.5690168818272096	0.8920042408010357	1.0	ursolic-acid
Stearoyl-CoA desaturase inhibitor	0.7121433034784419	0.9524068222237332	0.5610997963340122	0.8989636313975095	1.0	MK-8245
Gastrin inhibitor	0.6334285544248051	0.951183084045717	0.5806150978564771	0.8978884994157903	1.0	rabeprazole;acexamic-acid
Arginase inhibitor	0.7120242806558157	0.951182767489098	0.5712871287128712	0.8942086285165453	1.0	inhibitor-BEC
Coagulation inhibitor	0.7132740202933913	0.9505263680904336	0.571285140562249	0.8920005007511267	1.0	betrixaban
Glutamate inhibitor	0.5055523594203639	0.9480811396390972	0.5539437896645513	0.8939254918963812	1.0	riluzole;safinamide
Lipoxygenase inhibitor	0.3452597717140525	0.9402237373083032	0.5593900481540931	0.90797532330885	1.0	REV-5901;eicosatetraynoic-acid;curcumin;masoprocol
BCL inhibitor	0.4006538851286001	0.939779578108931	0.5327102803738317	0.9052931716122572	1.0	gossypol;BH3I-1;BRD-K01265221
Melatonin receptor agonist	0.4432059534777738	0.9393303285239958	0.5439512619669278	0.9026280384432068	1.0	ramelteon
Cannabinoid receptor agonist	0.3447680136470178	0.9355615032847832	0.5417700578990902	0.9074744616925388	1.0	JWH-015;oleylethanolamide;palmitoylethanolamide;GW-405833;oleoylethanolamide
Chemoreceptor agonist	0.7001219983931919	0.9355028180306844	0.5934803451581975	0.9040161337623966	1.0	bemegride
Dopamine uptake inhibitor	0.3979162850212147	0.9328186377913388	0.5569837189374465	0.9064735496101294	1.0	diphenylpyraline;safinamide
Angiotensin receptor agonist	0.6993185943404647	0.9302238727835987	0.6016597510373444	0.9086265267466416	1.0	delivert
Adrenergic receptor ligand	0.6929211176243044	0.9292761272845386	0.6005859375	0.9070608866054988	1.0	3-MPPI
Bile acid	0.6058739510801643	0.924898787078372	0.6178403755868545	0.9128729859495126	1.0	cholic-acid;taurocholic-acid
Platelet aggregation inhibitor	0.3873860372019663	0.9238425163634848	0.5601965601965602	0.9116000661147972	1.0	icosapent;indobufen;etofylline-clofibrate;tirofiban;MY-5445;triflusal
Protein kinase C inhibitor	0.6880114261909721	0.922934075778292	0.6046511627906976	0.9099994836612896	1.0	myricitrin
FXR antagonist	0.5398061475737239	0.9228657909793988	0.6117755289788408	0.9065902633019296	1.0	GR-235
NADPH inhibitor	0.6083850084426471	0.9225569967446406	0.6350293542074364	0.9037511382904472	1.0	dicoumarol
Serotonin receptor agonist	0.2520170803450147	0.9206969117617652	0.5837716003005259	0.9042207542082352	1.0	rotundine;LY-344864;SR-57227A;rizatriptan;WAY-629;aripiprazole;sumatriptan;TCB2;mCPP
Growth hormone releasing peptide ligand agonist	0.6878626476626892	0.9174173208247296	0.611	0.9077862483380243	1.0	L-692585
Membrane permeability inhibitor	0.5296406742461954	0.9001040920869258	0.665395614871306	0.940538909509302	1.0	enflurane
Angiotensin antagonist	0.5916167135222912	0.899914945609505	0.6569767441860465	0.9373097193318496	1.0	azilsartan-medoxomil
Alcohol dehydrogenase inhibitor	0.5914122478128905	0.8962437143732455	0.6817325800376648	0.9413623275822826	1.0	fomepizole;formononetin
Nootropic agent	0.6697116672121879	0.8949764228849002	0.6564356435643565	0.940584225394696	1.0	exifone
Telomerase reverse transcriptase expression inhibitor	0.6720326122533995	0.8938666947426339	0.6650485436893204	0.9358363387778296	1.0	gambogic-acid
MYC expression inhibitor	0.6720326122533995	0.8938666947426339	0.6650485436893204	0.9358363387778296	1.0	gambogic-acid
Dopamine receptor partial agonist	0.6718838337251167	0.89128074022734	0.6610009442870632	0.9374628640722278	1.0	brexpiprazole
Vasopressin receptor agonist	0.5816223293459502	0.8909721718834654	0.674928503336511	0.934597760953698	1.0	desmopressin-acetate;lypressin
Prostagladin inhibitor	0.672478947838248	0.8907818007656979	0.6633165829145728	0.9314951594057752	1.0	fenoprofen
NRF2 activator	0.5875141343807653	0.8906475643715648	0.6692233940556088	0.9283094383272325	1.0	BRD-K91781484;dimethyl-fumarate
Membrane integrity inhibitor	0.4776301276034709	0.888012065417013	0.6377325066430469	0.9302773093463726	1.0	eltanolone;etomidate;tetracaine
AXL kinase inhibitor	0.5908227457072293	0.8878128696938717	0.6782178217821783	0.9272411364299196	1.0	BMS-777607
ATM kinase inhibitor	0.4703419648714257	0.8871392356384175	0.6452488687782806	0.9252407351903768	1.0	KU-60019;KU-55933
Vasopressin receptor antagonist	0.4725963679735043	0.8848415989911648	0.6320501342882722	0.9263952747302772	1.0	relcovaptan
Dihydrofolate reductase inhibitor	0.4707995060687985	0.8841909049173234	0.6390154968094804	0.9243491596089786	1.0	methotrexate;succinylsulfathiazole;pemetrexed
L-type calcium channel activator	0.6628678549111793	0.8832947324596796	0.6646586345381527	0.9227611724445874	1.0	BAY-K8644
GLP receptor agonist	0.662272740798048	0.8827437416070403	0.6832993890020367	0.9205017057961042	1.0	geniposide
Coagulation factor inhibitor	0.4717110734793595	0.882481216203019	0.6341895482728078	0.9177374933367792	1.0	apixaban
Histamine receptor modulator	0.5845800595189242	0.8806754045199521	0.6875593542260209	0.9179103476643536	1.0	proxyfan
Membrane metalloendopeptidase inhibitor	0.6614098253340077	0.8795406698439795	0.6889804325437693	0.916680625921088	1.0	thiorphan
AP inhibitor	0.6537328532746153	0.8767872122041763	0.691	0.9187717746833016	1.0	T-5224
NADPH oxidase inhibitor	0.6569464694855238	0.8744239690212746	0.6871945259042033	0.92013550360877	1.0	apocynin
MAPK-interacting kinase inhibitor	0.6498051001279495	0.8718195046625805	0.6940948693126815	0.9218268423762404	1.0	CGP-57380
Nitric oxide scavenger	0.6502216800071414	0.8713933826153446	0.6901270772238515	0.9194047650423004	1.0	rutin
Adrenergic receptor antagonist	0.2214753138834845	0.867623851229072	0.6901114206128134	0.923564761477881	1.0	metoprolol;BE-2254;imiloxan;BMY-7378;isamoltane;RS-100329;ICI-118551;trazodone;pindolol;idazoxan;carvedilol;nebivolol;bisoprolol;nadolol;celiprolol;terazosin;nicergoline;cyanopindolol;doxazosin
Ion channel antagonist	0.6387954890350225	0.8675241017125416	0.6942307692307692	0.9205626820020972	1.0	erastin
Carbamoyl phosphate synthase activator	0.6456095456303745	0.8627890789932778	0.7092907092907093	0.9264287055583376	1.0	carglumic-acid
Endothelin receptor antagonist	0.3577329214685147	0.8616739659865787	0.6396321070234113	0.9252951659322896	1.0	FR-139317;atrasentan;bosentan;IRL-2500;zibotentan
Mediator release inhibitor	0.5671308694875915	0.8609770206636349	0.7255489021956087	0.9234390378671454	1.0	KIN001-055;ER-27319
Sodium/hydrogen antiport inhibitor	0.6405213199631029	0.8593903387402211	0.7108081791626095	0.9233050606838092	1.0	hexamethyleneamiloride
DNA protein kinase inhibitor	0.6454607671020918	0.8589756790327973	0.7182539682539683	0.9209533478299642	1.0	PIK-75
GABA receptor inverse agonist	0.6367125896390633	0.8547391923654337	0.7224448897795591	0.9258142760215408	1.0	L-655708
Capillary stabilizing agent	0.5676069749449504	0.8542891108655322	0.7235693501454898	0.9235006847005202	1.0	rutin;diosmin
Histamine receptor antagonist	0.2235325410361696	0.8538178912649231	0.7052932761087267	0.9212447909151864	1.0	VUF-5681;ICI-162846;epinastine;famotidine;emedastine;methapyrilene;trimethobenzamide;levocetirizine;thioperamide;bepotastine;doxylamine;deptropine;dimenhydrinate;nizatidine;lafutidine;cetirizine;levocabastine;doxepin
Diacylglycerol kinase inhibitor	0.6330228821376499	0.8533423884435083	0.7017017017017017	0.9189413342987454	1.0	R-59022
Smoothened receptor antagonist	0.407338287617232	0.8513666701332	0.6690203000882613	0.9193430296960592	1.0	SANT-1
GABA aminotransferase activator	0.6307019370964382	0.8457617074749467	0.7222777222777222	0.926345264541107	1.0	3-methyl-GABA
Interleukin receptor antagonist	0.6341833546582556	0.8433732354360018	0.7412935323383084	0.9274430039708392	1.0	hyperforin
HIF inhibitor	0.63855744338977	0.8421103993950424	0.7410281280310378	0.926531672508763	1.0	BAY-87-2243
P-glycoprotein inhibitor	0.3964830590686026	0.8400509442802494	0.6556350626118068	0.9271741915198378	1.0	dofequidar
Norepinephrine transporter inhibitor	0.5567546757251005	0.84001793771316	0.7433628318584071	0.9241712320135834	1.0	atomoxetine
Abl kinase inhibitor	0.3071746361649439	0.8367246048720287	0.6886715566422168	0.9269070685235776	1.0	rebastinib;imatinib;AT-9283
Anti-thyroid agent	0.5501696125691841	0.8358036287467212	0.7455230914231856	0.9255443609493188	1.0	carbimazole;methimazole
Purinergic receptor antagonist	0.3548504888238588	0.831408684469991	0.6853211009174311	0.9301934459065648	1.0	PIT;NF-449
RET tyrosine kinase inhibitor	0.3888055348963561	0.830331169085553	0.6790123456790124	0.929081121682524	1.0	amuvatinib;sorafenib;regorafenib
Unidentified pharmacological activity	0.617401136667956	0.8294442138534547	0.7618025751072961	0.9245735486346404	1.0	omecamtiv-mecarbil
Cardiac myosin activator	0.617401136667956	0.8294442138534547	0.7618025751072961	0.9245735486346404	1.0	omecamtiv-mecarbil
EPHB3 inhibitor	0.6098729431368465	0.8226477120101228	0.7630285152409046	0.9334608709180277	1.0	XMD-1499
Beta amyloid inhibitor	0.434889498576562	0.820794162242021	0.7286343612334801	0.9335499216566786	1.0	phenserine
Src activator	0.6125212009402803	0.8204748695351476	0.7840236686390533	0.9311133098361368	1.0	tolimidone
Rho associated kinase inhibitor	0.3488597391034939	0.8177509419807548	0.696137339055794	0.932836153268364	1.0	GSK-429286A;fasudil;hydroxyfasudil;KU-C103428N;Y-27632
T-type calcium channel blocker	0.4751783228660461	0.8161371991368637	0.7486338797814208	0.9325429838047806	1.0	pinaverium;zonisamide
Monamine transporter modulator	0.6172821138453298	0.8160052642274976	0.7776669990029911	0.9297596873016531	1.0	Ro-25-6981
DNA synthesis inhibitor	0.3619972536693561	0.8140582919090926	0.7107800175284837	0.9299019958509191	1.0	fludarabine-phosphate;estramustine-phosphate;suramin;fludarabine
Prostanoid receptor inhibitor	0.6154075043889664	0.8132897455694771	0.7794561933534743	0.9281608330216844	1.0	salicylic-acid
3-ketoacyl CoA thiolase inhibitor	0.6055286101109887	0.8093008378998278	0.7854368932038835	0.9318437435332808	1.0	trimetazidine
plasticizers and medicinal compounds	0.6056178772279585	0.8066658750810954	0.7927835051546391	0.9303863710926892	1.0	benzoic-acid
Precursor for food preservatives	0.6056178772279585	0.8066658750810954	0.7927835051546391	0.9303863710926892	1.0	benzoic-acid
Platelet activating factor receptor antagonist	0.3983838738630605	0.8044096861180122	0.7321739130434782	0.9312057930645968	1.0	ABT-491
Phosphorylase inhibitor	0.6043383818847263	0.8011725769319265	0.8044579533941236	0.9337469990031776	1.0	tagatose
Integrin inhibitor	0.430470712345902	0.8011502479780301	0.7320143884892086	0.930883903494994	1.0	ATN-161;GR-144053
Serotonin receptor inverse agonist	0.5987740649269497	0.7998539832963607	0.7978196233894945	0.9300808798336824	1.0	pimavanserin
Nitric oxide production inhibitor	0.4770324405240831	0.7994086963487881	0.7853356890459364	0.9279839898736992	1.0	methylene-blue
Serotonin receptor antagonist	0.1950576555618162	0.7928849884987306	0.8479166666666667	0.935624205539078	1.0	quetiapine;clozapine;BMY-7378;nefazodone;ondansetron;SB-258585;methysergide;alosetron;trazodone;BRL-15572;MDL-11939;aripiprazole;tropisetron;RS-127445;ziprasidone;risperidone
Elastase inhibitor	0.5899068646412948	0.7914192883145448	0.8315481986368062	0.9350317654395705	1.0	DMP-777
Topoisomerase inhibitor	0.242029127535096	0.788931296119355	0.7804499612102405	0.936110587900199	1.0	betulinic-acid;BRD-K85853281;amonafide;genz-644282;teniposide;daunorubicin;mitoxantrone;gambogic-acid;etoposide
ATP translocase inhibitor	0.5892224834111941	0.786876631233367	0.8242424242424242	0.9336852923762544	1.0	bongkrek-acid
Mitochondrial ADP	0.5892224834111941	0.786876631233367	0.8242424242424242	0.9336852923762544	1.0	bongkrek-acid
Thioredoxin inhibitor	0.5196184061155323	0.7867573669000351	0.8162859980139027	0.9310573815268356	1.0	PX-12
GSP agonist	0.5846698604457404	0.7848907749573888	0.8136769078295342	0.9311667652536204	1.0	KU-C103871
LXR agonist	0.4641421843941152	0.7841076341145397	0.7924701561065197	0.9295447312535068	1.0	T-0901317;GW-3965
Toll-like receptor antagonist	0.5913351385128098	0.7816571935500933	0.8190661478599222	0.9303871347561884	1.0	resatorvid
Cytidine deaminase inhibitor	0.5796113904841254	0.7793729026341296	0.8262626262626263	0.9311738940746448	1.0	tetrahydrouridine
Quorum sensing signaling modulator	0.5186099050284233	0.7787603070010846	0.8197674418604651	0.929300667419039	1.0	ursolic-acid
DNA methyltransferase inhibitor	0.3489048959284306	0.7785109269807718	0.7506276150627615	0.9268668627941914	1.0	zebularine;RG-108
Acetylcholine release stimulant	0.582467938227155	0.7770845625526833	0.8303747534516766	0.9262796271558674	1.0	bifemelane
Tyrosinase inhibitor	0.5108909123370827	0.7770012083290577	0.8330170777988615	0.9236558239726452	1.0	rucinol;azelaic-acid
Imidazoline receptor ligand	0.5804147945368524	0.7747664366910083	0.8370514064015518	0.924268039226982	1.0	AGN-192403
Pregnane X receptor agonist	0.5817538012913976	0.7747228226131871	0.8403525954946132	0.9216109090105749	1.0	guggulsterone
ICAM-1 expression inhibitor	0.5840152349212961	0.7739131703811997	0.8565697091273822	0.9201142255905852	1.0	polydatin
FtsZ inhibitor	0.5738387835867527	0.7670428643465934	0.8513779527559056	0.9275310992804996	1.0	sanguinarium-chloride
Lipase clearing factor inhibitor	0.4496672904068345	0.7664605668028764	0.806392694063927	0.9257088986249054	1.0	etofylline-clofibrate
Pyruvate dehydrogenase inhibitor	0.5643467134823101	0.7583212624069857	0.854	0.9349889660071504	1.0	CPI-613
Solute carrier family member inhibitor	0.5716666170738238	0.7560703552546276	0.8712871287128713	0.9355397226274194	1.0	bumetanide
VEGFR inhibitor	0.2171570750385153	0.7546803190354584	0.8476331360946746	0.9348254679707422	1.0	motesanib;linifanib;DMBI;rebastinib;sorafenib;vatalanib;orantinib;axitinib;brivanib;palomid-529;regorafenib;OSI-930;MGCD-265;TG-100801
Carnitine palmitoyltransferase inhibitor	0.5022588243213278	0.7530155449495065	0.8549471661863592	0.9345747728220573	1.0	etomoxir
Exportin antagonist	0.5674115511649358	0.7491963313474888	0.8720472440944882	0.9374611486194808	1.0	7b-cis
Peptidase inhibitor	0.3998734483666121	0.747696412984169	0.8054818744473917	0.9368508349917426	1.0	tosedostat
MAP kinase phosphatase inhibitor	0.5534561252120094	0.7385042183659383	0.8901209677419355	0.9471117390371272	1.0	CID-5458317
Chloride channel antagonist	0.39764472207495	0.7374802950651362	0.8028169014084507	0.9458145551660824	1.0	CFTRinh-172
Dehydrogenase inhibitor	0.4875319883354164	0.7366823567948022	0.8645224171539961	0.9442910815086266	1.0	azathioprine;mycophenolate-mofetil
Nucleoside reverse transcriptase inhibitor	0.5452137947451423	0.7347389448734388	0.8967551622418879	0.944287536120044	1.0	didanosine
Neurotransmitter	0.5519980956348378	0.7322288229292869	0.9009803921568628	0.9450446856725768	1.0	epinephrine
Isocitrate dehydrogenase inhibitor	0.427080356316013	0.7295471157744584	0.8269058295964126	0.946008625614478	1.0	AGI-5198;oxalomalic-acid
Superoxide dismutase inhibitor	0.5480703424881721	0.7275840130570216	0.9164237123420796	0.9459844612424254	1.0	tetraethylenepentamine
Protein tyrosine kinase inhibitor	0.4746228381639995	0.7208240126784503	0.8771929824561403	0.9521083095231084	1.0	AG-957
Protein kinase activator	0.5435177195227185	0.7192017685323984	0.9120323559150656	0.9515196328011568	1.0	SC-10
Lysophospholipid receptor antagonist	0.5336983366560537	0.7167107767946687	0.9142857142857144	0.9521174170726844	1.0	JTE-013
Opioid receptor agonist	0.2447443581838254	0.7111153118839686	0.8671328671328671	0.9564909864797196	1.0	nalbuphine;ICI-204448;salvinorin-a;tramadol;U-54494A
Sphingosine N acyltransferase inhibitor	0.5281935311095902	0.7044697698633526	0.937178166838311	0.9622541499229454	1.0	fumonisin-b1
Glutamate receptor positive allosteric modulator	0.5236706638497932	0.6965127973099345	0.9572736520854528	0.9693284747563332	1.0	AMN-082
Selective serotonin reuptake enhancer	0.5246823578421163	0.6938273607906738	0.9528392685274302	0.969990109130638	1.0	tianeptine
GABA benzodiazepine site receptor inverse agonist	0.5160234474960573	0.6931159178694862	0.9593082400813836	0.9682074622923396	1.0	Ro-15-4513
TRPV agonist	0.30531829409839	0.6923429743567577	0.839041095890411	0.9664129756278252	1.0	arvanil;capsaicin;evodiamine;icilin;disulfiram;olvanil;capsazepine
Delta 1 opioid receptor agonist	0.5213794745142382	0.6916416494995032	0.9528949950932286	0.964611363766962	1.0	SB-205607
Runt-related transcription factor inhibitor	0.5134644568095932	0.6859295176968666	0.9770687936191426	0.9687861151400124	1.0	BRD-K19059335
Cathepsin inhibitor	0.3646001609486464	0.6821147437371348	0.8628963153384748	0.970577639557162	1.0	odanacatib
Thromboxane synthase inhibitor	0.3406445929708773	0.681296035546705	0.8651982378854626	0.9688709894109456	1.0	dazoxiben;picotamide;triflusal
Tankyrase inhibitor	0.503883119588181	0.6738950879200136	0.9898785425101214	0.9746142862943064	1.0	XAV-939
Androgen receptor agonist	0.297641075425759	0.6693841012073091	0.8740425531914894	0.976574531608734	1.0	myricetin;tibolone
Tumor necrosis factor production inhibitor	0.4346279441273712	0.6605748656567344	0.9177820267686424	0.9799083706204468	1.0	pomalidomide
Calcineurin inhibitor	0.3479994568575884	0.6573887950168129	0.8775510204081632	0.9788504808150564	1.0	INCA-6;pimecrolimus
SIRT inhibitor	0.3237891349818718	0.6534946271679114	0.8881118881118881	0.9780151510688492	1.0	EX-527;sirtinol
Pyruvate kinase isozyme activator	0.429804242318709	0.6429787660118004	0.931640625	0.9801362043064598	1.0	BRD-K61106942
Renin inhibitor	0.4016597023581656	0.6071980350904032	0.9538904899135446	0.9919951403168582	1.0	VTP-27999
PPAR receptor antagonist	0.2751256254250908	0.5836138407295678	0.9295652173913044	0.9977826487742224	1.0	GSK-0660;BADGE
Gap junction modulator	0.383358666587173	0.577994656518565	0.9542857142857144	0.9969656866251758	1.0	enoxolone
Lysophospholipid receptor agonist	0.2807189834240991	0.5638481681263813	0.9627705627705628	0.9985268139676532	1.0	SEW-2871;BRD-K12401458;BRD-K16618170;BRD-K14236372;BRD-K14048378
Reducing agent	0.3677914658096769	0.5523027723058415	0.9751381215469612	0.9990419840286746	1.0	acexamic-acid;ginkgolide-b
Androgen receptor antagonist	0.2105557353765979	0.5490540715461373	0.978405315614618	0.9972345329017148	1.0	flutamide;RU-58841;nilutamide
Sodium/potassium/chloride transporter inhibitor	0.2894870958031896	0.5466184616491304	0.9723661485319516	0.9952890723519834	1.0	bendroflumethiazide;tienilic-acid
L-type calcium channel blocker	0.358477007494588	0.5421305062808274	0.972894482090997	0.9937317856680584	1.0	CGP-37157
CFTR channel agonist	0.3390191450863833	0.5107901004379156	0.9817658349328215	0.9977735157423636	1.0	aloisine
Sodium/calcium exchange inhibitor	0.3205602516500696	0.4884382727720648	0.9914367269267363	0.9988092528402996	1.0	CGP-37157
Methionine aminopeptidase inhibitor	0.285237810132833	0.4303306301368715	1.0	1.0	1.0	fumagillin
Adenosine deaminase inhibitor	0.2746586029422978	0.4152789585810855	1.0	0.9994191869199148	1.0	EHNA
Adenosine reuptake inhibitor	-0.303189906564304	-0.4706640541631924	0.9906735751295336	0.9964656207422196	1.0	dilazep;propentofylline
CDC inhibitor	-0.317919419151342	-0.5004911910885715	0.9773895169578622	0.9960605260306624	1.0	NSC-663284;KU-C103428N
Plasminogen activator inhibitor	-0.3268761530679045	-0.5172793033926941	0.966497461928934	0.996758698992426	1.0	tranexamic-acid;aminocaproic-acid
Guanylyl cyclase activator	-0.3465155031839552	-0.5391930213563584	0.9661016949152542	0.99539590443686	1.0	YC-1;molsidomine
Voltage-gated sodium channel blocker	-0.286715201105823	-0.5632362308148628	0.9511363636363636	0.99231225242266	1.0	tolperisone
Serine protease inhibitor	-0.3779384633696364	-0.5930071883265662	0.9292403746097816	0.9857357150721128	1.0	dabigatran-etexilate;gabexate
Cholinergic receptor agonist	-0.3274795272392619	-0.5934375010464695	0.934878587196468	0.9895624628649596	1.0	PNU-282987
Calcium channel activator	-0.302835676096152	-0.5987606807860705	0.9169472502805835	0.9914901218124808	1.0	cinacalcet
Orexin receptor antagonist	-0.3032467540415538	-0.6003195941583467	0.9437939110070258	0.9948718395207912	1.0	almorexant;SB-334867
IKK inhibitor	-0.2639507969555169	-0.6026639147655389	0.928743961352657	0.9980155122251442	1.0	IKK-16
Interleukin inhibitor	-0.3721577831793006	-0.6600254846177844	0.8649789029535865	0.9748591974606384	1.0	tanshinone-iia
11-beta-HSD1 inhibitor	-0.3403166289727413	-0.6607582895268035	0.8725824800910125	0.9784838377570304	1.0	chenodiol;carbenoxolone;adrenosterone;emodin
FOXM1 inhibitor	-0.5048650578748475	-0.665542657112605	0.9939577039274924	0.9792778950051688	1.0	thiostrepton
Dihydropteroate synthetase inhibitor	-0.5041806766447466	-0.6741290044797688	0.9940357852882704	0.9736703640500568	1.0	sulfaphenazole
Serotonin receptor partial agonist	-0.3423371817414008	-0.6796281842985701	0.8397365532381997	0.9704167678181274	1.0	tegaserod
Myosin light chain kinase inhibitor	-0.5120361829380784	-0.6861593431232559	0.9741468459152016	0.9656731293199872	1.0	ML-7
Glucosyltransferase inhibitor	-0.5244740679025204	-0.6965647072348796	0.952047952047952	0.9559806166385852	1.0	DL-PDMP
Atherogenesis inhibitor	-0.5247418692534294	-0.6974836092324982	0.949654491609082	0.9588075577023196	1.0	probucol
Purine antagonist	-0.4455258380075365	-0.7035263588886278	0.8357438016528925	0.9544913223440564	1.0	thioguanine
Neurotransmitter agonist	-0.537269021334841	-0.7084172697980504	0.9480122324159022	0.9518155100492984	1.0	almitrine
Diuretic	-0.4502492937865013	-0.7140968804684148	0.8067940552016986	0.9478020770774436	1.0	chlorothiazide
Importin-beta transport receptor inhibitor	-0.5417323771833249	-0.718656825307043	0.929563492063492	0.9450688478286454	1.0	importazole
Polar auxin transport inhibitor	-0.5400958133722141	-0.7222308669904984	0.9221902017291066	0.9441717270215564	1.0	quercetin
Phospholipase inhibitor	-0.3743810287832267	-0.7235453185477522	0.7965554359526372	0.9464126725033388	1.0	loteprednol
Serotonin release inhibitor	-0.5400065462552445	-0.7247651975910873	0.9173469387755102	0.9487998718273544	1.0	telotristat
FGFR inhibitor	-0.2674005585530854	-0.7266894492273229	0.8138957816377171	0.9501582989042572	1.0	dovitinib;lucitanib;nintedanib
Survivin inhibitor	-0.5491415478918082	-0.7344715208629246	0.9042871385842473	0.9429474071958022	1.0	YM-155
Dehydropeptidase inhibitor	-0.5472074270241319	-0.7362359316517343	0.9113247863247864	0.944495831949017	1.0	cilastatin
Oxidative stress inducer	-0.5569672984794835	-0.7364532127808996	0.8954183266932271	0.9483940083428138	1.0	elesclomol
Selective estrogen receptor modulator	-0.3727808423691465	-0.7431436947156995	0.7692307692307693	0.9427013499512432	1.0	toremifene
Imidazoline receptor agonist	-0.4203838714477012	-0.7479984928735016	0.7656078860898138	0.9397163256248182	1.0	moxonidine;rilmenidine;nandrolone
FAAH reuptake inhibitor	-0.5681256881006933	-0.7578789178909606	0.8680490103675778	0.9287561879285428	1.0	LY-2183240
Lipase inhibitor	-0.484310870245978	-0.7581458060882539	0.7722457627118644	0.9325784133553658	1.0	orlistat
Sigma receptor agonist	-0.3876687897773235	-0.7635629840064967	0.7308934337997847	0.9282694694384114	1.0	4-IBP;cutamesine
Folate receptor ligand	-0.5788079864313982	-0.7662860760098624	0.8516992790937178	0.9281659575794412	1.0	folic-acid
Aryl hydrocarbon receptor agonist	-0.432435649456926	-0.7679040710260083	0.728051391862955	0.929865829602029	1.0	BRD-K61463582;ITE;diosmin
Anti-rheumatic drug	-0.5749397446960455	-0.7690109755462976	0.842741935483871	0.9323952910460672	1.0	sulfasalazine
HDAC inhibitor	-0.2081033876719551	-0.7702718978888928	0.8270348837209303	0.9346756099102516	1.0	mocetinostat;NSC-3852
TLR agonist	-0.489228114027257	-0.7716620140549085	0.7519294377067255	0.9368501468370504	1.0	imiquimod;RWJ-21757
Oxytocin receptor antagonist	-0.5762787514505907	-0.7746268299836266	0.8500496524329693	0.9363337692577588	1.0	L-368899
ACAT inhibitor	-0.4360743164495733	-0.7763863380092831	0.7169811320754716	0.937835488471214	1.0	linoleamide
Eukaryotic translation initiation factor inhibitor	-0.5809206415330139	-0.7764236705710836	0.8493803622497617	0.9421948451284692	1.0	salubrinal
NFKB pathway inhibitor	-0.254929563927679	-0.7787058108021915	0.7843137254901961	0.9428125454927778	1.0	mepacrine;caffeic-acid;bindarit;BAY-11-7085;erythromycin
GABA benzodiazepine site receptor partial agonist	-0.5927931680899813	-0.7846092649382004	0.8196078431372549	0.9378169185763042	1.0	bretazenil
Glycine transporter inhibitor	-0.4490472702631584	-0.7899438808300723	0.7279569892473118	0.933512418962392	1.0	bitopertin
NUR77 receptor agonist	-0.5972267682328086	-0.7905777102255053	0.8148893360160966	0.9369605703596744	1.0	cytosporone-b
EGFR inhibitor	-0.2041973034694121	-0.7914548714583652	0.8067484662576687	0.9401040378559296	1.0	WZ-3146;AG-490;ARRY-334543;BIBU-1361;dovitinib;rociletinib;RG-14620;GW-583340;canertinib;chrysophanic-acid
Interferon inducer	-0.5896688189960425	-0.7918650929310037	0.8165983606557377	0.9440442857616224	1.0	imiquimod
PKA inhibitor	-0.5119993070756519	-0.7981412401284611	0.7375	0.9378256888370932	1.0	H-89
5 alpha reductase inhibitor	-0.4468061963673767	-0.7993259003656796	0.6962719298245614	0.9403943317941512	1.0	dutasteride
MALT1 inhibitor	-0.6014223227303835	-0.8004652593511642	0.8003913894324853	0.9429651641755914	1.0	mepazine
Dopamine precursor	-0.5985360192816973	-0.8034955274577613	0.7751710654936461	0.942254080356841	1.0	levodopa
Intermediate conductance potassium channel blocker	-0.5951438688368494	-0.8042201487083456	0.7896311066799602	0.9457299679079008	1.0	senicapoc
PKC activator	-0.5189251919300125	-0.8053698794531737	0.7251828631138976	0.948387372013652	1.0	ingenol-mebutate;ingenol
DNA binding agent	-0.6157050614455322	-0.8100320166608873	0.7924528301886793	0.9452595743221224	1.0	bisbenzimide
NOP receptor antagonist	-0.6072544410390692	-0.8111787142222305	0.7857878475798146	0.9480707243079256	1.0	trap-101
Guanylyl cyclase inhibitor	-0.5217906453207591	-0.8128756416495269	0.6998939554612937	0.9496825245577866	1.0	ODQ
Adrenergic receptor agonist	-0.1944303882251964	-0.8173047365062627	0.8081761006289309	0.9467485372988786	1.0	cyclobenzaprine;clenbuterol;L-755507;CGP-12177;ZD-7114;lofexidine;salmeterol;levalbuterol;medetomidine
Src inhibitor	-0.3058404085824066	-0.8178829390573648	0.7222914072229141	0.9505753916163472	1.0	dasatinib;masitinib;PP-2;aminogenistein;butein
S100A9 inhibitor	-0.6126402237629066	-0.8183617995958458	0.7536082474226804	0.9545978325885788	1.0	tasquinimod
Somatostatin receptor agonist	-0.3803123771649571	-0.818974424082915	0.6768507638072856	0.9584497515429096	1.0	BRD-K08438429;somatostatin
Adenylyl cyclase inhibitor	-0.6199601273544202	-0.8206401090610098	0.7770204479065238	0.9603731157565416	1.0	SQ-22536
Beta-secretase inhibitor	-0.6149909245097748	-0.8229182525777207	0.7551229508196722	0.9614053035041008	1.0	ellagic-acid
Glutathione transferase inhibitor	-0.6149909245097748	-0.8229182525777207	0.7551229508196722	0.9614053035041008	1.0	ellagic-acid
Adrenergic transmitter uptake inhibitor	-0.615853839973815	-0.8230532338493646	0.7826941986234022	0.9713170630406126	1.0	BTS-54505
Thrombin inhibitor	-0.3878282276216841	-0.8235801161604683	0.6711165048543689	0.97560090044296	1.0	argatroban;dabigatran-etexilate;skatole
HMGCR inhibitor	-0.3039138163033202	-0.8275319299845102	0.6707021791767555	0.9735859903998832	1.0	cerivastatin;pitavastatin;procaine
Ribosomal protein inhibitor	-0.6191269675960366	-0.8331016352902022	0.7559139784946236	0.9685493045616352	1.0	BI-D1870
Opioid receptor antagonist	-0.2570188247244643	-0.8360559161430932	0.6963064295485636	0.9681832856747532	1.0	BRD-K18722736;BNTX;taxifolin
Dopamine receptor ligand	-0.6298092659267415	-0.8378709697244754	0.7544224765868887	0.9700971026858584	1.0	3'-fluorobenzylspiperone
3beta-hydroxy-delta5-steroid dehydrogenase inhibitor	-0.6330228821376499	-0.8406616048845262	0.7532082922013821	0.9701808127715922	1.0	trilostane
Excitatory amino acid transporter inhibitor	-0.6254946886065403	-0.8426978572760362	0.7243186582809225	0.9717562727375014	1.0	DL-TBOA
Ornithine decarboxylase inhibitor	-0.629839021632398	-0.8460217005711775	0.7273603082851637	0.9708059132992664	1.0	eflornithine
KATP activator	-0.6380515963936085	-0.8470566065477596	0.7371601208459214	0.9742249715585892	1.0	minoxidil
Vasodilator	-0.6380515963936085	-0.8470566065477596	0.7371601208459214	0.9742249715585892	1.0	minoxidil
GLCNAC phosphotransferase inhibitor	-0.6440027375249204	-0.8514317414199284	0.7153209109730849	0.9767131955362962	1.0	tunicamycin
Growth factor receptor activator	-0.5378801404511099	-0.8521577359914708	0.6588486140724946	0.9809032799213282	1.0	dihydrodeoxygedunin;serotonin
Steroidal progestin	-0.5462809318257148	-0.8554866693783405	0.6797583081570997	0.9801184843313684	1.0	ethynodiol
Reverse transcriptase inhibitor	-0.5405879902398381	-0.8560192957967163	0.660377358490566	0.9847245246221356	1.0	ellagic-acid;nevirapine
Noradrenaline uptake inhibitor	-0.643080310649567	-0.8590886583933708	0.7104743083003953	0.9847176454434898	1.0	nomifensine
DNA directed DNA polymerase inhibitor	-0.6483173148451216	-0.8629797532807257	0.7085478887744593	0.9829746098759098	1.0	trifluridine
Cannabinoid receptor antagonist	-0.3585640054828718	-0.865267751214495	0.6264916467780429	0.9842274188427654	1.0	AM-251
TP53 activator	-0.5491804910067997	-0.8661048947094453	0.6659574468085107	0.9883290421731232	1.0	mepacrine
Bacterial 30S ribosomal subunit inhibitor	-0.6524236022257268	-0.8676567267501629	0.706511175898931	0.9910811082112024	1.0	chlorzoxazone
Calcium/calmodulin dependent protein kinase inhibitor	-0.4847657697962607	-0.8704210957171927	0.605543710021322	0.9916695276369732	1.0	KN-93
KIT inhibitor	-0.2745355946311988	-0.8743104011465841	0.6328233657858137	0.9897204615634648	1.0	dasatinib;midostaurin;sunitinib
Calpain inhibitor	-0.6543577230934032	-0.8771791455492834	0.6693227091633466	0.989824957593346	1.0	MDL-28170
Tricyclic antidepressant	-0.3914590855241786	-0.8796804981324327	0.584180790960452	0.9907633948764342	1.0	trimipramine;desipramine;protriptyline;nortriptyline
Acetylcholine receptor antagonist	-0.2085012290697726	-0.8810459208308592	0.6916932907348243	0.9940092046747336	1.0	metixene;PD-102807;DAU-5884;scopolamine;otenzepad;homatropine-methylbromide;propantheline;tolterodine;strychnine;trihexyphenidyl;BRD-K58033748;glycopyrrolate;darifenacin;ipratropium;gelsemine;AQ-RA741;vecuronium;oxybutynin;clidinium;deltaline
Norepinephrine reputake inhibitor	-0.3925974382806734	-0.8855626782568599	0.5854503464203233	0.9907860234745692	1.0	trimipramine;amoxapine
Androgen receptor enhancer	-0.671467253845925	-0.8874723425590672	0.6646646646646647	0.9928756883519336	1.0	ASC-J9
XIAP inhibitor	-0.3598119128187189	-0.8913107664993497	0.5789473684210527	0.9911304934058064	1.0	BRD-A05680309;BRD-A94297859
Glucagon receptor antagonist	-0.5711487173080574	-0.8948533862328995	0.6244813278008299	0.9900260742373816	1.0	MK-0893
P selectin inhibitor	-0.6766149909245098	-0.8987225706428553	0.6699900299102692	0.9882572525597269	1.0	KF-38789
Dystrophin stimulant	-0.667212187937037	-0.903727169920399	0.633816425120773	0.9841103741387082	1.0	ataluren
Aldehyde dehydrogenase inhibitor	-0.6758413425774392	-0.905111816628942	0.6429980276134122	0.987384974294725	1.0	disulfiram
Penicillin binding protein inhibitor	-0.6853036569762252	-0.9062989431336256	0.6423645320197044	0.9909512836677464	1.0	amoxicillin
GABAergic transmission enhancer	-0.6779242419733984	-0.9076277107113312	0.6337448559670782	0.99441563840028	1.0	valproic-acid
Cholesteryl ester transfer protein inhibitor	-0.5863833839195381	-0.9105763805276128	0.6315228966986155	0.9945777826709238	1.0	torcetrapib;anacetrapib
Pyruvate dehydrogenase kinase inhibitor	-0.572210794665873	-0.9112989039954172	0.6260330578512396	0.999484730286778	1.0	GSK-2334470
Sigma receptor ligand	-0.6883387389531943	-0.9192306592028504	0.627906976744186	0.9887154520511277	1.0	4-PPBP
Antifibrinolytic	-0.6913440652245069	-0.920679216483755	0.6207920792079208	0.9919054248248608	1.0	tranexamic-acid
Fibrinogen stimulant	-0.6913440652245069	-0.920679216483755	0.6207920792079208	0.9919054248248608	1.0	tranexamic-acid
ATP synthase inhibitor	-0.5201859769299294	-0.9214821357266656	0.5522552255225522	1.0	1.0	oligomycin-c
Syk inhibitor	-0.4741758159546527	-0.9257249700261616	0.5175141242937853	1.0	1.0	fostamatinib;SYK-inhibitor
BTK inhibitor	-0.4343362199803589	-0.925975931546036	0.5228365384615384	1.0	1.0	LFM-A13;ibrutinib;GDC-0834;CNX-774;AVL-292
Aromatase inhibitor	-0.4122884953179427	-0.9262833607327756	0.5488810365135454	1.0	1.0	anastrozole
ATPase inhibitor	-0.2569619541917622	-0.9278447748667538	0.56	1.0	1.0	gitoxigenin;oligomycin-c;cyclopiazonic-acid;thapsigargin;istaroxime
LDL receptor activator	-0.701669295087333	-0.9310690723251968	0.6375121477162293	1.0	1.0	berberine
CHK inhibitor	-0.4185902813786972	-0.9347847727328948	0.5423312883435583	1.0	1.0	AZD-7762;PF-477736
Beta secretase inhibitor	-0.6993483500461214	-0.9349018679160188	0.5825242718446602	1.0	1.0	compound-w
Mucus protecting agent	-0.6032085544320207	-0.9404311659651716	0.5971074380165289	1.0	1.0	cetraxate
NGF binding inhibitor	-0.7077692147469278	-0.9412528793267396	0.5954045954045954	1.0	1.0	Ro-08-2750
Kinesin inhibitor	-0.5270341972048527	-0.9423162630930256	0.5424274973147154	1.0	1.0	ispinesib
N-type calcium channel blocker	-0.7061624066414736	-0.9485624854461048	0.5625	1.0	1.0	Z160
Anti-HCVE2	-0.7109828309578362	-0.951249838844582	0.5583075335397317	1.0	1.0	metitepine
Histamine receptor agonist	-0.3659808905730151	-0.951375650558434	0.5120711562897078	1.0	1.0	alimemazine;amodiaquine;histamine
Ubiquitin specific protease inhibitor	-0.7210105037640968	-0.9546277923681504	0.5705705705705706	1.0	1.0	NSC-632839
Guanylate cyclase stimulant	-0.6007558174135571	-0.955645346470597	0.5637860082304527	1.0	1.0	isosorbide-dinitrate;riociguat
Glucosylceramidase inhibitor	-0.4884193767813439	-0.9574482114257228	0.5034168564920274	1.0	1.0	BRD-K88761633
CCR antagonist	-0.7185110244889458	-0.9586309223710232	0.555440414507772	1.0	1.0	RS-102895
CCK receptor antagonist	-0.3021411859576552	-0.9594750288931212	0.4872139973082099	1.0	1.0	proglumide;vicriviroc;LY-288513;lorglumide
Neural Wiskott-Aldrich syndrome protein inhibitor	-0.7255928824352069	-0.9609881492996774	0.574826560951437	1.0	1.0	wiskostatin
Histamine receptor ligand	-0.6104339987584533	-0.9675301355272576	0.556745182012848	1.0	1.0	alimemazine
Bacterial 50S ribosomal subunit inhibitor	-0.6281616378027733	-0.970830202803636	0.5715823466092572	1.0	1.0	erythromycin-estolate;linezolid
ATR kinase inhibitor	-0.6126688445158255	-0.9711178057958368	0.5534979423868313	1.0	1.0	VE-821
DYRK inhibitor	-0.3874471405384514	-0.9783059879696656	0.4677206851119894	1.0	1.0	BRD-K06217810;ML-167;BRD-K68783079;BRD-K59222562;purvalanol-a;BRD-A81377415
Mineralocorticoid receptor agonist	-0.6200083318455037	-0.9783203548895676	0.5623721881390593	1.0	1.0	desoxycortone;fludrocortisone-acetate
JAK inhibitor	-0.3216134404850179	-0.9790947391660768	0.4779319041614123	1.0	1.0	pacritinib;lestaurtinib;AG-490
Chelating agent	-0.4963172009401703	-0.982035543147782	0.4662084765177549	1.0	1.0	dimercaptosuccinic-acid
Phosphatidylglycerophosphatase inhibitor	-0.7308298866307614	-0.9828489292752	0.5300713557594292	1.0	1.0	alexidine
Neural stem cell inducer	-0.7326152289701551	-0.9855539529352212	0.5293532338308458	1.0	1.0	CHEMBL-1222381
Aryl hydrocarbon receptor antagonist	-0.6303636255430578	-0.9991240285236732	0.5168884339815762	1.0	1.0	stemregenin-1;sulforaphane
Glycine receptor antagonist	-0.632238290781408	-1.0009006884319014	0.5202558635394456	1.0	1.0	gelsemine;ginkgolide-b
Sphingosine 1 phosphate receptor agonist	-0.7567471062576249	-1.0020682756997776	0.4938650306748466	1.0	1.0	fingolimod
P21 activated kinase inhibitor	-0.7576397774273217	-1.009771262062953	0.4747572815533981	1.0	1.0	PF-03758309
Anti-hypertensive agent	-0.7623114232154016	-1.011623411133469	0.4879759519038076	1.0	1.0	aliskiren
Microtubule inhibitor	-0.4499953818993946	-1.0158690484964614	0.4318181818181818	1.0	1.0	epothilone;D-64131;vinblastine
Uric acid diuretic	-0.76829232005237	-1.0184257596512518	0.4701718907987866	1.0	1.0	lesinurad
CCK receptor ligand	-0.7723390960216622	-1.0248648822655932	0.4522292993630573	1.0	1.0	ZK-756326
Transthyretin amyloid inhibitor	-0.767756717350552	-1.0249197296014652	0.4677259185700099	1.0	1.0	tafamidis-meglumine
Transthyretin stabilizer	-0.767756717350552	-1.0249197296014652	0.4677259185700099	1.0	1.0	tafamidis-meglumine
Anti-neoplastic agent	-0.7689171898711579	-1.0267194400954496	0.4646061814556331	1.0	1.0	mitotane
AMPK inhibitor	-0.7635314071473205	-1.0299450155129777	0.4587884806355511	1.0	1.0	dorsomorphin
Bacterial antifolate	-0.6580041851540974	-1.0304789327809882	0.4792099792099792	1.0	1.0	dapsone
Dynamin inhibitor	-0.6533059572695352	-1.0317385030476751	0.4692982456140351	1.0	1.0	dynasore;mdivi-1
Guanylate cyclase activator	-0.7710596006784302	-1.035260163281179	0.4539147670961347	1.0	1.0	cinaciguat
Antiviral	-0.6531274177230256	-1.0373278609427263	0.48582995951417	1.0	1.0	ribavirin;vidarabine
Kinesin-like spindle protein inhibitor	-0.6658275479658788	-1.041128148164615	0.4534632034632034	1.0	1.0	SB-743921
Cannabinoid receptor partial agonist	-0.7750468652364091	-1.0426826183396112	0.4189723320158103	1.0	1.0	BAY-59-3074
Thyroid hormone receptor agonist	-0.7850150266313566	-1.047135136523383	0.4235294117647059	1.0	1.0	sobetirome
Growth hormone secretagogue receptor agonist	-0.786740857559437	-1.0493634988500402	0.4161793372319688	1.0	1.0	anamorelin
Trypsin inhibitor	-0.8056952420626655	-1.068091904603363	0.4073705179282869	1.0	1.0	camostat-mesilate
Tumor necrosis factor receptor antagonist	-0.804385991013777	-1.0725134177317976	0.391304347826087	0.9956825938566554	1.0	VGX-1027
Microsomal trigylceride transfer protein inhibitor	-0.8138185497069064	-1.0763548260838127	0.3818181818181818	0.9928379356707002	1.0	lomitapide
Cholesterol inhibitor	-0.5974179586103848	-1.07800175676204	0.4015572858731924	0.9975491049662184	1.0	ezetimibe
Norepinephrine inhibitor	-0.8170916773291279	-1.0917419462363604	0.351	0.96137539143591	1.0	amitriptyline
ROR antagonist	-0.6971076593465453	-1.0970035787056889	0.4056706652126499	0.9533738623435722	1.0	BRD-A38793261;BRD-A32917072
Immunosuppressant	-0.5707814898521426	-1.106506290564947	0.3704545454545455	0.9299937129513204	1.0	beclomethasone-dipropionate;fingolimod;ginkgolide-b
Matrix metalloprotease inhibitor	-0.7140840383421768	-1.1078074261834117	0.3871983210912906	0.9354395105656814	1.0	NSC-405020
AMPK activator	-0.7094566446467893	-1.109230220973967	0.391304347826087	0.9403189107857168	1.0	PTB1;AICA-ribonucleotide
Bone morphogenic protein inhibitor	-0.8400630820959919	-1.1115911396851308	0.3235867446393762	0.942359771479448	1.0	LDN-212854
Anti-inflammatory agent	-0.7074675587054313	-1.1157959511567697	0.3792349726775956	0.938153996174474	1.0	tanshinone-iia
MRE11A exonuclease inhibitor	-0.8345285208438719	-1.116414935074462	0.3197211155378486	0.9462362533181646	1.0	mirin
Protease inhibitor	-0.6322571045975302	-1.1210910239038143	0.3654708520179372	0.9395444261226368	1.0	camostat-mesilate;aliskiren;ginkgolide-b
Toll-like receptor agonist	-0.8454488648198293	-1.125019939457606	0.3122529644268774	0.9355365730685696	1.0	resiquimod
Receptor tyrosine protein kinase inhibitor	-0.5817001864413751	-1.1284661819175683	0.3514412416851441	0.9335402691145896	1.0	GW-583340;AV-412
M5 modulator	-0.8430088969559913	-1.130185244723635	0.3131923464249748	0.9378968568934042	1.0	VU-0365114-2
Prostanoid receptor agonist	-0.4478866134337272	-1.130277188748472	0.2832722832722832	0.9485645452720338	1.0	dinoprostone;MRE-269;alprostadil;iloprost
Benzodiazepine receptor antagonist	-0.6347322637341617	-1.1376842333145991	0.3404940923737916	0.9316238013976922	1.0	flumazenil
Opiod receptor modulator	-0.8567560329693219	-1.1413468312790265	0.2871794871794871	0.928702866071796	1.0	sufentanil
Binding of RNA helicase A to the transcription factor EWS-FLI1 inhibitor	-0.8607730532329575	-1.14438528059751	0.2944162436548223	0.9280206859235828	1.0	YK-4279
D-Amino Acid Oxidase Inhibitor	-0.8573511470824531	-1.151102148157781	0.2772585669781931	0.9126585345299794	1.0	SEP-227900
GABA aminotransferase inhibitor	-0.8612491445234624	-1.1559931214993646	0.2635814889336016	0.905050127986348	1.0	vigabatrin
Aldose reductase inhibitor	-0.3997271788984751	-1.1569032468020484	0.2529801324503311	0.912769473365879	1.0	sorbinil;AD-5467;ponalrestat;hyperin;isoquercetin;epalrestat;fidarestat
HIF modulator	-0.7322821785573147	-1.1591693122726034	0.3243243243243243	0.9152172486216856	1.0	VU-0418946-1
WEE1 kinase inhibitor	-0.8659505460171988	-1.1605098878679387	0.2439516129032258	0.921269004033509	1.0	MK-1775
Muscle relaxant	-0.874252387895379	-1.1679899924120127	0.253411306042885	0.9016076881623856	1.0	methocarbamol
Catecholamine depleting sympatholytic	-0.8798167048531557	-1.175476937431274	0.224950884086444	0.8813538111490329	1.0	mepireserpate
Cholinesterase inhibitor	-0.6657045082576998	-1.17578182322987	0.2951351351351351	0.8919207176459738	1.0	ambenonium;physostigmine;mestinon
Prostacyclin analog	-0.8842800607016396	-1.178148115721832	0.2244488977955911	0.8936953574267147	1.0	dinoprost
STAT inhibitor	-0.6119905288959813	-1.1924331954714813	0.2884187082405345	0.8436255688282138	1.0	meisoindigo;niclosamide;cryptotanshinone
Histone lysine methyltransferase inhibitor	-0.5616843482737887	-1.1995967384435098	0.2720763723150358	0.8235350670576359	1.0	BIX-01294;QW-BI-011
Niemann-Pick C1-like 1 protein antagonist	-0.8977296396584046	-1.2023319588468062	0.1906693711967545	0.8224463676255485	1.0	ezetimibe
Calmodulin antagonist	-0.5262374877346877	-1.2044610822099358	0.2412965186074429	0.8241826185883169	1.0	zaldaride;berbamine;W-9
Thyrotropin releasing hormone receptor agonist	-0.7726687619878567	-1.2045002080630751	0.2552742616033755	0.8360959144750051	1.0	taltirelin
Dopamine beta hydroxylase inhibitor	-0.8953194275002232	-1.2051060406220746	0.1792828685258964	0.8457860017319545	1.0	fusaric-acid
Ephrin inhibitor	-0.6090528860737678	-1.2091710582071111	0.263215859030837	0.8392607818802359	1.0	dasatinib;ALW-II-38-3
Progesterone receptor agonist	-0.3758947181957375	-1.214202005562674	0.2150395778364116	0.8287214491992649	1.0	progesterone;nomegestrol;nomegestrol-acetate;norethindrone;dienogest
Microtubule stabilizing agent	-0.7734113808301822	-1.2172561747120108	0.2393340270551509	0.8265585004266213	1.0	epothilone-b
Protein phosphatase inhibitor	-0.7893603100312842	-1.2190179115582307	0.2541152263374485	0.8306449428463081	1.0	calyculin
DNA replication inhibitor	-0.903174933793555	-1.2196602859849086	0.1642228739002932	0.8407189254651547	1.0	niclosamide
Butyrylcholinesterase inhibitor	-0.9160591543428452	-1.2209552653286035	0.1599607458292443	0.847640295417669	1.0	profenamine
Gonadotropin releasing factor hormone receptor antagonist	-0.9151664831731484	-1.2215722908497837	0.1630988786952089	0.8584755403868032	1.0	T-98475
Cadherin antagonist	-0.9161186657541583	-1.2223309614108853	0.1586206896551724	0.8694683866489269	1.0	exherin
PPAR receptor modulator	-0.9217424941232482	-1.230225626088329	0.1504065040650406	0.8426503471813581	1.0	caffeic-acid
DOT1L inhibitor	-0.9265331627339544	-1.2313584186850564	0.1498501498501498	0.8511316687623495	1.0	EPZ-5676
AGT inhibitor	-0.9270390097301158	-1.2373312522067452	0.1402439024390244	0.8333206362749879	1.0	lomeguatrib
Microtubule stimulant	-0.9290921534204184	-1.23919607298177	0.148406374501992	0.8382019857275831	1.0	epothilone-b
Steroid	-0.9312345642276908	-1.2393926913695965	0.1486220472440945	0.8525628871192011	1.0	clocortolone-pivalate
Serine/threonine kinase inhibitor	-0.9344184247329426	-1.2403743803784242	0.1258955987717502	0.8629821624058213	1.0	LDN-193189
Thyroid-stimulating hormone receptor inverse agonist	-0.9354896301365788	-1.2417060837781428	0.130822596630327	0.8715049881858756	1.0	BRD-A61599461
CFTR channel potentiator	-0.9351623173743564	-1.2438669946960172	0.134020618556701	0.8753346048316938	1.0	ivacaftor
Gluconeogenesis inhibitor	-0.9399827416907192	-1.2505534590732696	0.1392532795156407	0.8511348122866895	1.0	benfluorex
Sigma receptor antagonist	-0.5587579146145534	-1.2578934961768444	0.1925837320574162	0.8234746116876785	1.0	SM-21;BD-1063
Cytokine production inhibitor	-0.9499509030856668	-1.2643560913267085	0.1001964636542239	0.7999057878270763	1.0	mepacrine
Adenosylhomocysteinase inhibitor	-0.9577468979676852	-1.2768768047265278	0.0845921450151057	0.7369744390385593	1.0	3-deazaadenosine
ITK inhibitor	-0.9623292766387956	-1.2777982748046568	0.0922768304914744	0.7472547855764949	1.0	KIN001-127
Gonadotropin releasing factor hormone receptor agonist	-0.8223627937805786	-1.279559775804928	0.1822916666666666	0.7528251801289344	1.0	triptorelin
Vesicular monoamine transporter inhibitor	-0.7196845707484005	-1.280236269208821	0.2145214521452145	0.7655134967421656	1.0	reserpine;tetrabenazine;isoreserpine
Rho associated kinase activator	-0.9609605141785936	-1.2882010424210344	0.0737463126843657	0.72845067068815	1.0	narciclasine
LIM kinase activator	-0.9609605141785936	-1.2882010424210344	0.0737463126843657	0.72845067068815	1.0	narciclasine
Coflilin signaling pathway activator	-0.9609605141785936	-1.2882010424210344	0.0737463126843657	0.72845067068815	1.0	narciclasine
FLT3 inhibitor	-0.3832802958901496	-1.2896067548981676	0.1422764227642276	0.7722269624573379	1.0	ENMD-2076;pacritinib;midostaurin;sunitinib;lestaurtinib;fostamatinib;dovitinib;tozasertib
Leukocyte elastase inhibitor	-0.825186973901396	-1.294412367883113	0.1530054644808743	0.7566071584842916	1.0	SSR-69071
Indoleamine 2,3-dioxygenase inhibitor	-0.9748564287202072	-1.299809679554799	0.056640625	0.7340802945931382	1.0	indoximod
Calcium channel modulator	-0.8181872284711064	-1.3007432647606365	0.1482617586912065	0.7463794852873351	1.0	kawain;kavain
HSP inhibitor	-0.4641030241620674	-1.3015946396155242	0.1389610389610389	0.7601915054986728	1.0	geldanamycin;tanespimycin;alvespimycin;NVP-AUY922;ganetespib;BIIB-021
Neuropeptide receptor ligand	-0.9769690838218228	-1.3135140594445394	0.0392927308447937	0.6838859093125303	1.0	BRD-K11757396
DNA intercalator	-0.9939595917517184	-1.3184901695730091	0.0097751710654936	0.6624548283477213	1.0	diminazene-aceturate
Angiotensin converting enzyme activator	-0.9939595917517184	-1.3184901695730091	0.0097751710654936	0.6624548283477213	1.0	diminazene-aceturate
Corticosteroid agonist	-0.6721087896787402	-1.3229586687345647	0.1701199563794983	0.6653023677474403	1.0	hydrocortisone-acetate;fluocinolone-acetonide;dexamethasone-acetate
Interleukin synthesis inhibitor	-0.9959829797363644	-1.335378812702711	0.0029498525073746	0.5965952879004734	1.0	STA-5326
Protein synthesis stimulant	-0.9978575891927276	-1.336624875440178	0.0048169556840077	0.6099402730375426	1.0	nicotinamide
Adenylyl cyclase activator	-0.8623757662322205	-1.3529195106063256	0.0985324947589098	0.56306637636813	1.0	colforsin;forskolin
Dopamine receptor antagonist	-0.3029865320086367	-1.3561952716478531	0.0456204379562043	0.5716418820087762	1.0	ecopipam;perphenazine;thiothixene;flupentixol;promazine;YM-09151-2;domperidone;trifluoperazine;L-741742;thioridazine;iloperidone;blonanserin;prochlorperazine;fluphenazine;spiramide;levomepromazine;loxapine
GAT inhibitor	-0.761146327910817	-1.3570444625865403	0.1203407880724174	0.5897484515231955	1.0	NNC-711;NNC-05-2090
Potassium channel blocker	-0.4336792048497032	-1.4240983653823345	0.0721784776902887	0.3938205565765292	1.0	doxapram;amiodarone;AS-77;ibutilide;CP-339818
ErbB2 inhibitor	-0.8091635373829592	-1.42790916403139	0.0753880266075388	0.3981399317406143	1.0	AG-490;GW-583340
TRPV antagonist	-0.6015225024319557	-1.4320408055507423	0.0813953488372093	0.4021970989761092	1.0	SB-366791;AM-404;AMG-9810;SB-705498;phenamil
Selective serotonin reuptake inhibitor	-0.7240202774666852	-1.4321996405339408	0.1031487513572204	0.4191460157293367	1.0	paroxetine;fluoxetine
Catechol O methyltransferase inhibitor	-0.7990180032733224	-1.4358263341082542	0.0780911062906724	0.4260006205398697	1.0	entacapone;purpurogallin;tolcapone
Neuropeptide receptor antagonist	-0.602121739235855	-1.4437159582174317	0.1037394451145959	0.4204656265236469	1.0	CGP-71683;BRD-K37940862;PD-160170;BRD-K36038115
TNF production inhibitor	-0.9217699220377312	-1.4509390690899795	0.0252365930599369	0.4186433447098976	0.9995	thalidomide;caffeic-acid
Progestogen hormone	-0.8244053796071462	-1.4611080773749046	0.0599571734475374	0.406659780851446	0.9995	altrenogest;norethindrone
Aurora kinase inhibitor	-0.4649777803223383	-1.4686899151142276	0.0625	0.4040102389078498	0.9995	ENMD-2076;MK-5108;danusertib;JWE-035;tozasertib;GSK-1070916;alisertib
Antihistamine	-0.842302382390993	-1.511336086350161	0.0478723404255319	0.2957488456133306	0.998	homochlorcyclizine;antazoline
Akt inhibitor	-0.5996431319690965	-1.5172074305059675	0.0635294117647058	0.2978882252559727	0.997	MK-2206;GSK-690693;GDC-0068;triciribine;pyrvinium-pamoate
APEX inhibitor	-0.979259656013807	-1.5268015662343415	0.0	0.2928612059158134	0.995	BRD-K00313977;BRD-K30351863
Protein synthesis inhibitor	-0.6756837192562166	-1.5547879919792065	0.0660377358490566	0.2488420282788883	0.9855	anguidine;emetine;cycloheximide
Casein kinase inhibitor	-0.7979704797047971	-1.5592644448581017	0.0436681222707423	0.2581714360724599	0.9815	LY-303511;CX-4945;EI-231;IC-261
PLK inhibitor	-0.6436040601087443	-1.596358818789168	0.03671970624235	0.2063068828213879	0.9375	HMN-214;LY-294002;GSK-461364;NMS-1286937
Tachykinin antagonist	-0.5902144425797297	-1.6396862527025988	0.0261096605744125	0.1531569965870307	0.854	L-733060;netupitant;aprepitant;SB-218795
ALK inhibitor	-0.7772755955732535	-1.6406109527486183	0.0265486725663716	0.1671075085324232	0.852	CEP-37440;NVP-TAE684;crizotinib
Pim kinase inhibitor	-0.7911239940730914	-1.6724843057781529	0.0162513542795232	0.1390310959423587	0.7595	SGI-1776;GDC-0349;quercetagetin
Tubulin inhibitor	-0.5857862650146738	-1.679821428331297	0.0246609124537607	0.1454244880546075	0.7355	epothilone-b;flubendazole;paclitaxel;vinorelbine;vinblastine;docetaxel;CYT-997;vincristine
IMPase inhibitor	-0.8653418244556939	-1.6946751308336012	0.0054406964091403	0.1438322769380789	0.684	L-690488
Growth factor receptor inhibitor	-0.9075407689560768	-1.7789197985415206	0.0011111111111111	0.0718856655290102	0.3865	lestaurtinib;GW-441756;danusertib;PHA-848125
DNA dependent protein kinase inhibitor	-0.7935955749250101	-1.7976444938958704	0.0048426150121065	0.0727815699658703	0.343	NU-7026;LY-294002;KU-0060648;VAMA-37
IGF-1 inhibitor	-0.7192025681710974	-1.881517672020057	0.0035252643948296	0.0347696245733788	0.1495	NVP-ADW742;NVP-AEW541;linsitinib;BMS-536924;EI-247;BMS-754807
Glucocorticoid receptor agonist	-0.5296239753204589	-2.1094273837483577	0.0	0.002844141069397	0.01	hydrocortisone;dexamethasone;methylprednisolone;budesonide;mometasone;clobetasol;hydrocortisone-hemisuccinate;amcinonide;piretanide;betamethasone;fluticasone;rimexolone;hydrocortisone-acetate;loteprednol;fluticasone-propionate;prednisone;betamethasone-acetate;halcinonide;beclomethasone-dipropionate;fluocinolone-acetonide;medrysone;beclometasone
PI3K inhibitor	-0.715757190501771	-2.682509087068653	0.0	0.0	0.0	voxtalisib;wortmannin;buparlisib;taselisib;PI-103;GDC-0941;PF-04691502;PF-05212384;torin-1;PKI-179;NVP-BEZ235;ZSTK-474;SB-2343;GDC-0980;NU-7026;alpelisib
MTOR inhibitor	-0.852452881647503	-3.016460619097968	0.0	0.0	0.0	voxtalisib;PI-103;PF-04691502;PF-05212384;torin-1;PKI-179;NVP-BEZ235;AZD-8055;KU-0063794;SB-2343;GDC-0980;everolimus;deforolimus;torin-2;WYE-125132;NU-7026;WYE-354;sirolimus;LY-294002;OSI-027

## Sheet: Supplementary Table 10 
Supplementary Table 10. Results of enrichment of small molecule drug targets in the drug prioritization based on s1 (IRS2, RMND5B).
Target	ES	NES	NOM p-val	FDR q-val	FWER p-val	Lead drugs
SCN5A	0.6307180551827217	1.979778579302045	0.0	0.0287297058494811	0.0245	disopyramide;tocainide;lidocaine;topiramate;benzonatate;riluzole;propafenone;quinidine;mexiletine;mephenytoin;licarbazepine;phenytoin;ranolazine
CACNA1D	0.7886152993112504	1.9753677281345328	0.0008396305625524	0.0157460887828887	0.0265	isradipine;nilvadipine;nitrendipine;nimodipine;nifedipine
CDK9	0.815717225862455	1.818248603676804	0.001743679163034	0.1051580900003444	0.23	dinaciclib;BMS-387032;AT-7519;alvocidib;roscovitine;PHA-793887
CACNA1S	0.7298609202081678	1.7314422119223822	0.0094420600858369	0.2302520175532935	0.521	isradipine;nimodipine;nifedipine
CDK2	0.5949170800111286	1.7293777027359123	0.0112721417069243	0.1878480767081459	0.526	dinaciclib;purvalanol-b;BMS-387032;AT-7519;alvocidib;BMS-265246;roscovitine;PHA-793887
GRIA1	0.7113094256944832	1.7237007826318589	0.0066334991708126	0.1688791042562449	0.55	aniracetam;topiramate;NBQX;mibampator;SYM-2206;ampalex;perampanel;GYKI-52466
GABRA1	0.4827899080105244	1.7172132131146107	0.0022641509433962	0.1556455492724637	0.5825	propofol;enflurane;clonazepam;lorazepam;pentobarbital;picrotoxin;topiramate;eltanolone;clomethiazole;zopiclone;gabazine;tracazolate;butalbital;CGS-20625;securinine;temazepam;etomidate;chlordiazepoxide;bemegride;ZK-93426;nitrazepam
CACNA2D1	0.8487189603106337	1.7165615925457458	0.0017196904557179	0.1376401532644613	0.588	isradipine;nitrendipine;nifedipine;gabapentin
HTR1F	0.7844021115552412	1.7093774693449568	0.0107816711590296	0.1333353015065663	0.611	LY-344864;methysergide;rizatriptan;sumatriptan;zolmitriptan
CA4	0.8287178376726594	1.6583705782548013	0.0069868995633187	0.2119920795085752	0.8085	diclofenamide;topiramate;methazolamide;acetazolamide
PDE5A	0.6517113235355605	1.6509895131413406	0.0099420049710024	0.207737873065479	0.8325	T-0156;sildenafil;pentoxifylline;tadalafil;mirodenafil;zaprinast;avanafil;MY-5445
GSK3B	0.7416609268433311	1.6504104296048174	0.0078125	0.1915774135251458	0.8355	TWS-119;AR-A014418;SB-415286;SB-216763;kenpaullone
GABRG3	0.5633036768142454	1.6404343711721452	0.0148514851485148	0.1346632265070315	0.8695	propofol;enflurane;clonazepam;lorazepam;pentobarbital;topiramate
GABRG2	0.5633036768142454	1.6404343711721452	0.0148514851485148	0.1346632265070315	0.8695	propofol;enflurane;clonazepam;lorazepam;pentobarbital;topiramate
GABRG1	0.5633036768142454	1.6404343711721452	0.0148514851485148	0.1346632265070315	0.8695	propofol;enflurane;clonazepam;lorazepam;pentobarbital;topiramate
GABRB1	0.5633036768142454	1.6404343711721452	0.0148514851485148	0.1346632265070315	0.8695	propofol;enflurane;clonazepam;lorazepam;pentobarbital;topiramate
GABRP	0.5633036768142454	1.6404343711721452	0.0148514851485148	0.1346632265070315	0.8695	propofol;enflurane;clonazepam;lorazepam;pentobarbital;topiramate
GABRE	0.5633036768142454	1.6404343711721452	0.0148514851485148	0.1346632265070315	0.8695	propofol;enflurane;clonazepam;lorazepam;pentobarbital;topiramate
GABRQ	0.5633036768142454	1.6404343711721452	0.0148514851485148	0.1346632265070315	0.8695	propofol;enflurane;clonazepam;lorazepam;pentobarbital;topiramate
CA2	0.6476487850773175	1.6246578783492238	0.024793388429752	0.1501679624978648	0.91	diclofenamide;topiramate;brinzolamide;benzthiazide;methazolamide;acetazolamide
GABRD	0.5436330467785219	1.6084445032714854	0.0196238757154538	0.1692474338184177	0.938	propofol;enflurane;clonazepam;lorazepam;pentobarbital;topiramate
FAAH	0.8539336481376243	1.6063412988634973	0.010948905109489	0.1655473959438633	0.9425	PF-3845;PF-750
BCHE	0.8559714534177127	1.604360144229554	0.0088573959255978	0.1613283482317017	0.945	tacrine;phenserine;galantamine
CDK7	0.7626638579779303	1.6032546195523671	0.0195729537366548	0.1567472493021771	0.946	BMS-387032;alvocidib;roscovitine;PHA-793887;BS-181
RARA	0.6052475741602259	1.6002481406442488	0.0285474391267842	0.1548089149812426	0.953	acitretin;AM-580;alitretinoin;isotretinoin;AC-55649;tretinoin;adapalene
CDK1	0.5411217566872415	1.5923639336783384	0.0255813953488372	0.1608608530181747	0.9635	dinaciclib;AT-7519;alvocidib;CGP-60474;kenpaullone;BMS-265246;BRD-K71726959;PHA-793887
GABRA2	0.5013438303024823	1.5819197705143218	0.023538961038961	0.1712118581500062	0.9735	propofol;enflurane;clonazepam;lorazepam;pentobarbital;topiramate
GABRB2	0.5331512552538505	1.577316287235748	0.0238683127572016	0.1676534558855663	0.977	propofol;enflurane;clonazepam;lorazepam;pentobarbital;topiramate
GABRB3	0.5331512552538505	1.577316287235748	0.0238683127572016	0.1676534558855663	0.977	propofol;enflurane;clonazepam;lorazepam;pentobarbital;topiramate
GABRA4	0.5352638770802041	1.576415439871617	0.0239273927392739	0.1633357443455437	0.9775	propofol;enflurane;clonazepam;lorazepam;pentobarbital;topiramate
CDK5	0.5924686529625605	1.5619301333836375	0.0375816993464052	0.1813607237743921	0.9865	dinaciclib;AT-7519;alvocidib;kenpaullone;BRD-K71726959;PHA-793887
ABCC8	0.6052432926546624	1.5512888410668524	0.0475	0.1943744161378958	0.9915	glipizide;tolbutamide;pinacidil;gliclazide;glimepiride;repaglinide;nateglinide
CACNA1F	0.82530455236002	1.5477284942722174	0.0134168157423971	0.1948128538837777	0.993	isradipine;nimodipine;nifedipine
ACE	0.5179751220917778	1.547555925567699	0.0303272146847565	0.1893918109025467	0.993	fosinopril;benazepril;quinapril;ramipril;zofenopril-calcium;captopril;rescinnamine;cilazapril;enalaprilat;enalapril;lisinopril
PTGS1	0.402324373683799	1.5433497881473064	0.0113475177304964	0.1914313971629987	0.9945	nepafenac;icosapent;oxaprozin;tenoxicam;fenbufen;ibuprofen-piconol;lornoxicam;indoprofen;piroxicam;resveratrol;bromfenac;indobufen;eicosatetraynoic-acid;curcumin;tolmetin;carprofen;sulindac;mesalazine;etofenamate;triflusal;ifosfamide;paracetamol;mefenamic-acid;fenoprofen;aminosalicylic-acid;metoxibutropate;aspirin;fentiazac;phenacetin;epirizole;hyperforin;phenylbutazone;salicylic-acid;acemetacin;…
GABRA3	0.4801636392563767	1.5316250810729055	0.0322061191626409	0.2051442190651786	0.996	propofol;enflurane;clonazepam;lorazepam;pentobarbital;topiramate;butalbital;stiripentol;CGS-20625;temazepam;etomidate;chlordiazepoxide
GABRA5	0.4843181208521498	1.527819915947003	0.0358598207008964	0.206483561583485	0.996	propofol;enflurane;clonazepam;lorazepam;pentobarbital;topiramate
HTR1E	0.7192473200698544	1.5268703094825786	0.0245009074410163	0.2025764127534518	0.996	quetiapine;clozapine;methysergide;ziprasidone;olanzapine
PPARG	0.4963076342432837	1.5264265561306185	0.0402476780185758	0.1982463035787175	0.996	efatutazone;troglitazone;rosiglitazone;nTZDpa;balaglitazone;eicosatetraynoic-acid;pioglitazone;telmisartan;BADGE;mesalazine;GW-1929
GABRA6	0.5102411610450339	1.520908470397358	0.0367047308319739	0.2033317306779864	0.9965	propofol;enflurane;clonazepam;lorazepam;pentobarbital;topiramate
RXRG	0.7568800199468267	1.5193255773132717	0.0348837209302325	0.2015526315153327	0.997	bexarotene;acitretin;alitretinoin
RRM1	0.7078441727140438	1.5046559066557337	0.0391807658058771	0.2225368286884947	0.9985	hydroxyurea;fludarabine-phosphate;trimidox;fludarabine
TERT	0.9809983616628284	1.500809263698305	0.0009182736455463	0.225147869230974	0.999	BIBR-1532
RRM2	0.9754214939388272	1.4991433534787302	0.0029126213592233	0.2232328280559771	0.999	hydroxyurea
MAP2K1	0.5576467222263705	1.4930216733909545	0.0551894563426688	0.2305006400077602	0.999	trametinib;PD-184352;PD-0325901;selumetinib;PD-198306;AS-703026;refametinib;U-0126
CACNA1C	0.4746126001508631	1.4923074844475062	0.0422535211267605	0.2270871858261454	0.999	benidipine;isradipine;nilvadipine;nitrendipine;nimodipine;pinaverium;nifedipine
CA7	0.7381483796089634	1.4730370624910905	0.0471950133570792	0.2629755521926115	1.0	brinzolamide;methazolamide;acetazolamide;sulpiride;zonisamide
ABCC1	0.96417306433375	1.466736425164476	0.0113636363636363	0.2718502374811881	1.0	dofequidar;sulfinpyrazone
CYP3A4	0.4450096098717236	1.4635546015632968	0.0491174213353798	0.2735636276766528	1.0	delavirdine;cobicistat;indinavir;enilconazole;efavirenz;metronidazole;nafcillin;nelfinavir
ACHE	0.4746155140648469	1.4491012393309826	0.0630841121495327	0.3038276892451282	1.0	tacrine;phenserine;galantamine;methylene-blue;neostigmine;ethoprop
PARP2	0.7221874774309849	1.444089541275996	0.0629853321829163	0.3107726514721212	1.0	veliparib;olaparib;rucaparib
HRH2	0.5542508331508811	1.4298477389394135	0.0866013071895424	0.3432902352058933	1.0	ICI-162846;epinastine;famotidine;betazole;nizatidine;lafutidine;doxepin
CYP2C9	0.5440158344385458	1.4241774959158249	0.080553295362083	0.353398315676074	1.0	enilconazole;efavirenz;metronidazole;nelfinavir;tienilic-acid;ifosfamide
AGTR1	0.5524876410951218	1.420435877054273	0.0770519262981574	0.3580777226923579	1.0	eprosartan;candesartan;ZD-7155;olmesartan-medoxomil;candesartan-cilextil;telmisartan;irbesartan
PRKCB	0.756948619977225	1.4156530962714409	0.0574606116774791	0.3651485341358879	1.0	enzastaurin;sotrastaurin;PKCbeta-inhibitor
DPP4	0.5520121802973494	1.4132951069882964	0.0923330585325638	0.3651001011902126	1.0	alogliptin;PT-630;NVP-DPP728;diprotin-a
CDK6	0.7568624921860095	1.4128779963656402	0.0733031674208144	0.3597707462939242	1.0	AT-7519;alvocidib;fisetin
CYP1A2	0.585062836187338	1.409527066839153	0.0906757912745936	0.3631221442248744	1.0	enilconazole;efavirenz;nafcillin;nelfinavir
MAP2K2	0.7084784096658037	1.4092085375364372	0.0827338129496402	0.3580818846083147	1.0	trametinib;PD-198306;AS-703026;refametinib;U-0126
VDR	0.5592454727365925	1.4051729849938834	0.0931372549019607	0.3633110718882302	1.0	paricalcitol;calcipotriol;ercalcitriol;alfacalcidol;maxacalcitol;seocalcitol
CYP3A5	0.5844206214021692	1.3998749981889969	0.088309503784693	0.3723268436508419	1.0	indinavir;enilconazole
NR1H4	0.6415498196360349	1.3843716324298172	0.0987762237762237	0.4108151890095937	1.0	GW-4064;WAY-362450;GR-235;fexaramine
CASP3	0.552665696962555	1.3824269054790448	0.1133167907361455	0.4100209607102079	1.0	SA-94315;BRD-K30064966;amygdalin;EMF-BCA1-57;ivachtin
ALOX5AP	0.9148832589658354	1.3768924911636904	0.0574488802336903	0.4200338244628469	1.0	quiflapon
PRKCD	0.7975777438897982	1.3708492314668803	0.0681173131504257	0.4322715741660393	1.0	sotrastaurin
SCN1A	0.5492109849114433	1.369093399794327	0.1282481139983235	0.4310544123855864	1.0	topiramate;phenacemide;phenytoin;zonisamide;carbamazepine;lacosamide
PTGS2	0.346981539975891	1.3686196246350038	0.0618846694796061	0.4259648924686561	1.0	nepafenac;icosapent;oxaprozin;tenoxicam;fenbufen;valdecoxib;ibuprofen-piconol;lornoxicam;indoprofen;piroxicam;resveratrol;DUP-697;bromfenac;indobufen;curcumin;lumiracoxib;tolmetin;iguratimod;carprofen;pterostilbene;nimesulide;sulindac;mesalazine;etofenamate;aceclofenac;deracoxib;rofecoxib;paracetamol;mefenamic-acid;aminosalicylic-acid;metoxibutropate;aspirin;fentiazac;epirizole
NOS3	0.9046301255728144	1.3678435294815074	0.044921875	0.4221544277509448	1.0	diphenyleneiodonium;asymmetrical-dimethylarginine
RARB	0.5271572323958859	1.3661288983498583	0.1226252158894646	0.4208485534400444	1.0	alitretinoin;TTNPB;isotretinoin;AC-55649;tretinoin;adapalene
PSMB1	0.7307592812653536	1.365624779558315	0.0963963963963964	0.4161308465665368	1.0	ixazomib;carfilzomib
PTK2	0.8982324584895554	1.3655283343393343	0.0403146509341199	0.4105577683149038	1.0	PF-562271;defactinib
KCNN4	0.7301890126909404	1.3649003063064509	0.0959780621572212	0.4067893072897153	1.0	quinine;clotrimazole
GRIA2	0.9053145271677676	1.364662209637559	0.0471153846153846	0.3964445558476089	1.0	aniracetam;SYM-2206
GRIA3	0.9053145271677676	1.364662209637559	0.0471153846153846	0.3964445558476089	1.0	aniracetam;SYM-2206
MAPK3	0.7245742796560545	1.3597089403443017	0.1081576535288725	0.4051404186163883	1.0	purvalanol-b;5-iodotubercidin
CETP	0.7930785892692579	1.3464503938137644	0.0938661710037174	0.4393275085024529	1.0	dalcetrapib
CALCA	0.8813763018326112	1.3449380795446104	0.0678642714570858	0.4388168383208586	1.0	MK-3207
CA1	0.5569852340031258	1.3445010103608874	0.1284246575342466	0.4346218001031345	1.0	diclofenamide;brinzolamide;methazolamide;acetazolamide
GPER1	0.997708810664445	1.3443007662478978	0.0029296875	0.4298056310592898	1.0	BRD-A83255679
CHRNA2	0.5973629181569817	1.3438679094525636	0.1247848537005163	0.4258971706806856	1.0	tubocurarine;decamethonium;carbachol;rocuronium
TYRO3	0.988722587556164	1.3386846099563023	0.0242013552758954	0.4287622366025902	1.0	BMS-777607
MST1R	0.988722587556164	1.3386846099563023	0.0242013552758954	0.4287622366025902	1.0	BMS-777607
MERTK	0.988722587556164	1.3386846099563023	0.0242013552758954	0.4287622366025902	1.0	BMS-777607
GAA	0.709631036878626	1.3380662588999663	0.1246636771300448	0.4261507261203601	1.0	voglibose;castanospermine
FDPS	0.6651823742622789	1.331144920533736	0.130593607305936	0.4517128751153149	1.0	zoledronic-acid;risedronate;pamidronate
VKORC1	0.6683985808384921	1.3310239028923474	0.1347708894878706	0.4470899864004787	1.0	warfarin;phenindione;dicoumarol
PTK2B	0.9946439729818192	1.3277961661691715	0.014014014014014	0.4579987590328425	1.0	PF-562271
ALDH2	0.8756128281559044	1.3243857141034348	0.09375	0.4710390976973714	1.0	alda-1
SLC22A6	0.7129738825683654	1.32266818076523	0.1243291592128801	0.4758652401896772	1.0	cefadroxil;nafcillin;probenecid
KCNJ11	0.5495855376729222	1.3210271384649257	0.1325403568394222	0.4804122479420288	1.0	glipizide;tolbutamide;glimepiride;P-1075;repaglinide;nateglinide
TCF4	0.991281578242628	1.3175307156707967	0.0236625514403292	0.4954295703769041	1.0	PNU-74654
SCN9A	0.6229688709005418	1.3153764095344829	0.1480851063829787	0.5026977878863644	1.0	lidocaine;ranolazine;zonisamide;lacosamide;tetracaine;rufinamide
CLCA1	0.9824143779569732	1.3095603796120263	0.0321324245374878	0.5318144205830649	1.0	talniflumate
RXRB	0.7681692120337169	1.308879789497046	0.1180297397769516	0.5303593039325044	1.0	bexarotene;alitretinoin
CLK2	0.9783378462820246	1.306805091649457	0.0398832684824902	0.530929798423915	1.0	WZ-3105
ULK1	0.9783378462820246	1.306805091649457	0.0398832684824902	0.530929798423915	1.0	WZ-3105
HCN4	0.7616896858839195	1.299090830656097	0.1195952161913523	0.5586108462916985	1.0	zatebradine;ivabradine
HCN3	0.7616896858839195	1.299090830656097	0.1195952161913523	0.5586108462916985	1.0	zatebradine;ivabradine
HCN1	0.7616896858839195	1.299090830656097	0.1195952161913523	0.5586108462916985	1.0	zatebradine;ivabradine
MAPK8	0.6351617130731955	1.2975313089755949	0.1784452296819788	0.561859122377497	1.0	AS-601245;BI-78D3
FBP1	0.9759871455351564	1.296050678432333	0.0429447852760736	0.5642608316983682	1.0	MDL-29951
SHH	0.8641642731171694	1.2954182047724014	0.1107899807321772	0.5621738274887065	1.0	SANT-1
P2RY1	0.965542892849704	1.2948241079374303	0.0632780082987551	0.5600844354506298	1.0	PIT
DIO1	0.9713154997470764	1.2934400358337057	0.0556117290192113	0.5621895564943309	1.0	propylthiouracil
PRKCA	0.5437335157839729	1.2892148347370882	0.1687657430730478	0.579766516412707	1.0	C-1;sotrastaurin;SC-9
TBXA2R	0.6859367314045803	1.2889665508826669	0.1570776255707762	0.5755323149310064	1.0	GR-32191;SQ-29548;picotamide
GRIK1	0.6928937031305797	1.2838125918643866	0.1550660792951541	0.5982584307761383	1.0	topiramate;SYM-2081;UBP-302;ATPA
PLCG1	0.9664355640194008	1.2815859704315464	0.068	0.5826447488485433	1.0	m-3M3FBS
PLCB2	0.9664355640194008	1.2815859704315464	0.068	0.5826447488485433	1.0	m-3M3FBS
PLCG2	0.9664355640194008	1.2815859704315464	0.068	0.5826447488485433	1.0	m-3M3FBS
PLCD1	0.9664355640194008	1.2815859704315464	0.068	0.5826447488485433	1.0	m-3M3FBS
PLCB3	0.9664355640194008	1.2815859704315464	0.068	0.5826447488485433	1.0	m-3M3FBS
PLAUR	0.9619722081709168	1.2796157669566726	0.080078125	0.5877073013137053	1.0	4-chlorophenylguanidine
PPARD	0.5788701160356569	1.278414682672507	0.1837606837606837	0.5886730298595186	1.0	carbacyclin;GW-501516;L-2167;GSK-0660;L-165041;bezafibrate
CYP2J2	0.9546820602850596	1.277705851125796	0.1012269938650306	0.5872774653914005	1.0	enilconazole
MME	0.6817458329075605	1.27542871402326	0.1697416974169741	0.5940028622377388	1.0	racecadotril;KBG;sacubitril
MIF	0.9463207069955664	1.271654328712685	0.1094674556213017	0.6076635006293198	1.0	ibudilast
TAAR1	0.9484928735084952	1.2690135687062905	0.1079365079365079	0.6160967429103856	1.0	hydroxyamphetamine
PRKCE	0.8267061951096776	1.2679060984609136	0.1479736098020735	0.6164072603122516	1.0	sotrastaurin
GPR119	0.6767060294407037	1.2627547624121949	0.1737891737891738	0.635723011951732	1.0	oleylethanolamide;palmitoylethanolamide;oleoylethanolamide
SLC15A2	0.8269742889391811	1.2620017527853171	0.1521531100478469	0.6286072320064515	1.0	cefadroxil
SLC15A1	0.8269742889391811	1.2620017527853171	0.1521531100478469	0.6286072320064515	1.0	cefadroxil
DDC	0.7307950143449867	1.2604320122921635	0.1748120300751879	0.6310788028960057	1.0	benserazide;carbidopa
GABRR1	0.9566459368583926	1.258808837050455	0.0905511811023622	0.6335060541394119	1.0	picrotoxin
HSPA1A	0.7357230981660399	1.256918986963271	0.1770157553290083	0.6374458734787953	1.0	VER-155008;pifithrin-mu
CAD	0.9449519445353648	1.256053806849338	0.098703888334995	0.6366401087127849	1.0	sparfosic-acid
CYP2B6	0.5241378720592704	1.2552359605969443	0.1964133219470538	0.6354598520804906	1.0	enilconazole;efavirenz;nelfinavir;thiotepa
MAOB	0.4171586728478989	1.254511493329875	0.1698717948717948	0.6336807971839659	1.0	harmane;hymecromone;diclofensine;safinamide;selegiline;lazabemide;tranylcypromine;farnesol
JAK1	0.6686703963813833	1.25305033685983	0.1981735159817351	0.6355912056461986	1.0	baricitinib;tofacitinib;filgotinib;AZD-1480
GRM7	0.8302008141820922	1.2521291714947975	0.1472332015810276	0.6348542500132608	1.0	L-glutamic-acid
GRM8	0.9354598744309222	1.2508867990154442	0.1205311542390194	0.6359758167743187	1.0	L-glutamic-acid
SLC19A2	0.9400720088076888	1.2508246434345252	0.1256085686465433	0.6314256942076086	1.0	thiamine
HDAC6	0.4881952505596987	1.2472851023983251	0.1941031941031941	0.6429663304911569	1.0	apicidin;NCH-51;PCI-34051;belinostat;vorinostat;ACY-1215;ISOX;droxinostat;PCI-24781;tubastatin-a
TPP2	0.9410241913886987	1.246676191172882	0.1351626016260162	0.6405800831800786	1.0	butabindide
POLR2A	0.9274555896093076	1.2454639082999337	0.1289340101522842	0.64143365487192	1.0	dactinomycin
CTNNB1	0.816142332699018	1.2440972786814428	0.172147001934236	0.6432212268475533	1.0	PNU-74654
CDA	0.8156127483038804	1.2394828932562925	0.1700879765395894	0.6597992300143052	1.0	zebularine
MGAM	0.7213406799243924	1.237955150777073	0.199812382739212	0.6618241659094242	1.0	voglibose
GPBAR1	0.8213515023187857	1.2371569928403523	0.1618217054263566	0.6605884703451187	1.0	betulinic-acid
TNNC1	0.9309667628767816	1.235569927671596	0.1473577235772357	0.6625748947654926	1.0	levosimendan
ENTPD1	0.931889189752135	1.234575124506932	0.1502392344497607	0.6575344121674924	1.0	PSB-069
ENTPD2	0.931889189752135	1.234575124506932	0.1502392344497607	0.6575344121674924	1.0	PSB-069
NAMPT	0.6620656417286008	1.233945027823422	0.2071167883211679	0.6558571486104051	1.0	FK-866;GMX-1778;CAY-10618
P2RX1	0.9201654417234504	1.232903252085706	0.1506707946336429	0.6556342942001918	1.0	NF-449
MAOA	0.4111795147999426	1.231530538282554	0.2124394184168012	0.6573425283865966	1.0	harmane;hymecromone;pirlindole;eprobemide
RARG	0.5118488873837777	1.2305605603865395	0.2068965517241379	0.657002810915354	1.0	CD-1530;alitretinoin;isotretinoin;tretinoin;adapalene
MAPK12	0.926949742613146	1.2289477824438493	0.1643426294820717	0.6597458982201101	1.0	doramapimod
TRPA1	0.6627511243071165	1.224274415221122	0.2278368794326241	0.6751256890434855	1.0	HC-030031;salirasib
SGK1	0.9218317612402178	1.2240107438624623	0.1533203125	0.6715772683181178	1.0	GSK-650394
CDK4	0.4838310625895447	1.2239043303607766	0.2223133716160787	0.6674941991608553	1.0	purvalanol-b;AT-7519;alvocidib;PHA-793887
TPO	0.713956001861087	1.222374874506513	0.2224316682375118	0.669531671456827	1.0	propylthiouracil
PPARA	0.4382556732650144	1.2180705449633435	0.2105678233438485	0.6834245981180787	1.0	enilconazole;clofibric-acid;gemfibrozil;eicosatetraynoic-acid;etofylline-clofibrate;oleoylethanolamide
GRIA4	0.9052875888951708	1.2178444391489045	0.1826003824091778	0.6799977600314158	1.0	SYM-2206
TYMP	0.9133811408337548	1.217624814153096	0.1638830897703549	0.6764647460600545	1.0	tipiracil
CDK8	0.9093641205701192	1.216655330224492	0.1830985915492957	0.6716595815133813	1.0	alvocidib
PYGM	0.9093641205701192	1.216655330224492	0.1830985915492957	0.6716595815133813	1.0	alvocidib
DNMT1	0.5241538185002808	1.2147897382679582	0.2484900776531492	0.6750706678733055	1.0	zebularine;triclosan;RG-108
ANPEP	0.9082631594608266	1.2134682728146713	0.1691691691691691	0.667699773097743	1.0	tosedostat
LAP3	0.9082631594608266	1.2134682728146713	0.1691691691691691	0.667699773097743	1.0	tosedostat
NPEPPS	0.9082631594608266	1.2134682728146713	0.1691691691691691	0.667699773097743	1.0	tosedostat
ATP4A	0.5702967165416333	1.211334551671544	0.2421602787456446	0.671682129160373	1.0	SCH-28080;esomeprazole
MAPK1	0.7207381355431212	1.208520643951024	0.2193308550185873	0.6786710915158117	1.0	purvalanol-b
UGCG	0.7890737390515269	1.2067884264262303	0.1954022988505747	0.6815644788234803	1.0	miglustat
HCN2	0.7949805023093943	1.2056225536641056	0.207492795389049	0.6822665054341897	1.0	zatebradine
LPAR3	0.9138869878299164	1.2046408627964045	0.1817258883248731	0.6781535235589702	1.0	KI-16425
LPAR1	0.9138869878299164	1.2046408627964045	0.1817258883248731	0.6781535235589702	1.0	KI-16425
PSMB10	0.8940696878626476	1.204545369812505	0.206	0.6664618302436361	1.0	carfilzomib
PSMB9	0.8940696878626476	1.204545369812505	0.206	0.6664618302436361	1.0	carfilzomib
PSMB8	0.8940696878626476	1.204545369812505	0.206	0.6664618302436361	1.0	carfilzomib
GRIN2B	0.4880047647845241	1.2040391579813985	0.2356902356902357	0.6644329471703023	1.0	CO-101244;eliprodil;traxoprodil;dizocilpine
CDKN1A	0.9002588746392121	1.1989119876619057	0.2005958291956306	0.6805340995693165	1.0	GGTI-298
TNKS	0.7922450651741945	1.197843286776738	0.2124645892351274	0.6767544727498553	1.0	endo-IWR-1
TNKS2	0.7922450651741945	1.197843286776738	0.2124645892351274	0.6767544727498553	1.0	endo-IWR-1
HTR3A	0.4045902444790997	1.1978072750636035	0.2234910277324633	0.6730270172254668	1.0	tubocurarine;ondansetron;SR-57227A;alosetron;tropisetron
SLC12A3	0.5148799903000052	1.197544714827871	0.2514332514332514	0.6701724812629407	1.0	quinethazone;metolazone;benzthiazide;bendroflumethiazide
SLC22A8	0.7886389335237756	1.1961015663461254	0.2068965517241379	0.6718927656789441	1.0	cefadroxil;probenecid
POLA1	0.701624748310401	1.195685863032807	0.2429378531073446	0.6695451081060251	1.0	fludarabine-phosphate;cytarabine
DPYD	0.7917336189966079	1.192173374902146	0.2262357414448669	0.6787268850907726	1.0	fluorouracil;gimeracil
HDAC8	0.560923192833246	1.1900212608838032	0.2596314907872696	0.6830249900549722	1.0	apicidin;NCH-51;PCI-34051;belinostat;vorinostat
SREBF1	0.8973130597792127	1.1872102811402667	0.2053663570691434	0.6854104409547273	1.0	fatostatin
SREBF2	0.8973130597792127	1.1872102811402667	0.2053663570691434	0.6854104409547273	1.0	fatostatin
KCNMA1	0.6383768647407645	1.1870470355973473	0.2646536412078152	0.6822485504786496	1.0	BMS-191011;penitrem-a;paxilline
CALCRL	0.6926569076346601	1.1856234014262244	0.2473933649289099	0.6838702522588505	1.0	MK-3207
RIPK1	0.8846966405808314	1.1837162942822683	0.2515151515151515	0.6871768501752882	1.0	necrostatin-1
PRKCH	0.886273692980629	1.180192389008236	0.2125256673511293	0.6963310192289575	1.0	sotrastaurin
ALPL	0.880530841788913	1.177659381285492	0.252	0.7018668327188121	1.0	BRD-K54331210
THRA	0.6999178062080518	1.17525888201645	0.2426470588235294	0.7064836757227406	1.0	liothyronine
PDE11A	0.8791025679173982	1.1742959823440742	0.2447552447552447	0.7061524242786851	1.0	tadalafil
PORCN	0.6921886624014283	1.1740937916314518	0.26497277676951	0.7032229852017585	1.0	wnt-c59;LGK-974;IWP-L6
BCL2L1	0.5520469063259649	1.1710454264429844	0.2782152230971129	0.710251833314521	1.0	gossypol;BH3I-1
GLI1	0.8735084952539649	1.1681568645936415	0.2565922920892495	0.7171781545180788	1.0	GANT-58
DDR2	0.7659346545259775	1.1673509516360163	0.2418111753371869	0.7161592821509883	1.0	sorafenib;regorafenib
RXRA	0.619418473169553	1.162758722224408	0.2871376811594203	0.7285568281995317	1.0	bexarotene;alitretinoin
MAP2	0.866753950069926	1.161766039149457	0.2642998027613412	0.7245807480107257	1.0	estramustine-phosphate
MAP1A	0.866753950069926	1.161766039149457	0.2642998027613412	0.7245807480107257	1.0	estramustine-phosphate
NOS2	0.516508999837742	1.1560903117218064	0.2898799313893653	0.7403057749344273	1.0	diphenyleneiodonium;asymmetrical-dimethylarginine
ADRA1A	0.3305858307927915	1.1560551606878242	0.2548725637181409	0.7366909091302234	1.0	clozapine;BE-2254;BMY-7378;oxymetazoline;RS-100329;etilefrine;anisodamine
CACNA2D2	0.8741928764840659	1.1558023779883897	0.268361581920904	0.7337264397256426	1.0	gabapentin
MTNR1B	0.4999516432214361	1.1556442778693197	0.2977099236641221	0.7306140773604618	1.0	ramelteon;4-P-PDOT
CHRNA4	0.6088806677858577	1.1543359018032482	0.3166089965397924	0.7313312372288402	1.0	varenicline;nicotine;UB-165
ADORA3	0.5008875324909692	1.1540243470410778	0.2827004219409282	0.7288032595047005	1.0	hemado;MRS-1334
MAPK10	0.7672072230222746	1.1495483319490103	0.2868217054263566	0.7363878668602277	1.0	AS-601245
MAPK9	0.7672072230222746	1.1495483319490103	0.2868217054263566	0.7363878668602277	1.0	AS-601245
NR1I3	0.6721212119443668	1.1473038109631122	0.3190883190883191	0.7405103349148597	1.0	TCPOBOP
FFAR4	0.8658910346058857	1.1453695748906731	0.2781124497991968	0.7431372328159832	1.0	GW-9508
ESR2	0.4049338151447968	1.1435315141843014	0.292817679558011	0.7457547189222393	1.0	estramustine-phosphate;PHTPP;genistein;DY-131;equol;alpha-estradiol;raloxifene;estradiol
TGFB1	0.857083345731544	1.1425998437886569	0.2775510204081632	0.7418803729709904	1.0	D-4476
CSNK1A1	0.857083345731544	1.1425998437886569	0.2775510204081632	0.7418803729709904	1.0	D-4476
VCP	0.8555062933317463	1.1423161031703215	0.286673058485139	0.7392929450665664	1.0	xanthohumol
BRAF	0.4688996737565981	1.1412737181137664	0.3084192439862543	0.7392163838773274	1.0	AZ-628;PLX-4720;sorafenib;regorafenib;vemurafenib
ADRA2B	0.3682723095004607	1.131497201253957	0.2928902627511592	0.7678335958436019	1.0	imiloxan;clonidine;oxymetazoline
TH	0.854316065105484	1.131174992484342	0.2777222777222777	0.761684783612174	1.0	tetrahydrobiopterin
PAH	0.854316065105484	1.131174992484342	0.2777222777222777	0.761684783612174	1.0	tetrahydrobiopterin
HK2	0.8450917963519504	1.1310072178621433	0.2779960707269155	0.7586857485134593	1.0	BRD-K92980438
SCN10A	0.6059142785348823	1.129999215919751	0.3333333333333333	0.7583563052987817	1.0	lidocaine;lacosamide;tetracaine
ACLY	0.8484244353854852	1.129797396030648	0.3008130081300813	0.7554797418350293	1.0	CHEMBL-399379
CYP51A1	0.6611279988997528	1.1290471983474433	0.3111527647610121	0.754417022407662	1.0	fluconazole
RYR1	0.5986550855058181	1.12808886257296	0.3351648351648351	0.7539570970866128	1.0	ryanodine;suramin;dantrolene
HCAR3	0.7496280426114383	1.1280683462731391	0.3168880455407969	0.75060014599339	1.0	niacin;IBC-293
CYP3A7	0.5325997934357063	1.1272054585693636	0.3382608695652174	0.7500939451259245	1.0	indinavir;nelfinavir;ifosfamide
THRB	0.6179669871039856	1.125360457059177	0.3348174532502226	0.7526747937017783	1.0	liothyronine
PTPN6	0.848632725325081	1.1221796737764518	0.311701081612586	0.7592939714264942	1.0	dephostatin
HTR1D	0.3443093906276339	1.1213620514855116	0.2956318252730109	0.758492974042364	1.0	quetiapine;clozapine;rizatriptan;BRL-15572;aripiprazole;sumatriptan;mCPP;ziprasidone;risperidone;zolmitriptan
HCAR2	0.8393489451602345	1.1209684928989123	0.3055555555555556	0.7563474904736901	1.0	niacin
SPHK1	0.735850740939118	1.1179957978894826	0.332697807435653	0.7622703065687546	1.0	SKI-II;PF-543
ENTPD3	0.7337677795631732	1.116327809341138	0.3509749303621169	0.763879656856337	1.0	PSB-069;PSB-06126
APLNR	0.8325943999761954	1.116269740173768	0.312	0.7606727514618679	1.0	BRD-K55186349
LPL	0.6567097360671389	1.1160288426214382	0.3317843866171003	0.7580779730301813	1.0	gemfibrozil
ABCG2	0.832148064391347	1.1154644749490354	0.3439048562933597	0.7565625923243068	1.0	KO-143
DRD1	0.3295843559255126	1.1145570153967137	0.310657596371882	0.7559876184789096	1.0	SKF-77434;rotundine;quetiapine;clozapine;fenoldopam;dopamine;diclofensine;haloperidol;dihydrexidine;L-stepholidine;SKF-81297
TEK	0.5535704530595651	1.113465470300015	0.3513281919451585	0.7561997251440604	1.0	rebastinib;regorafenib
IL5RA	0.8416698902014461	1.1131693309401174	0.3410931174089069	0.7538690056127113	1.0	YM-90709
NFATC1	0.8352724134852858	1.110078632474364	0.3415597235932873	0.7596868356425446	1.0	INCA-6
CXCR4	0.8325348885648823	1.1090368991944466	0.3440968718466196	0.7597293048071495	1.0	plerixafor
MDM2	0.4651146554475703	1.1035725236744365	0.3564695801199657	0.7729960111738997	1.0	AMG-232;nutlin-3
LRRK2	0.7273105992977444	1.1015077386769936	0.3490122295390404	0.7762896684451353	1.0	XMD-1150;XMD-885
CA14	0.7310291947634425	1.1003039120123776	0.3504761904761905	0.7766881554347193	1.0	acetazolamide
ADRA1B	0.3775991167703472	1.0995106236385364	0.3250798722044728	0.775832056604993	1.0	clozapine;BMY-7378;oxymetazoline;carvedilol;risperidone;terazosin;doxazosin
CSF1R	0.5494881637950767	1.0985954741752404	0.3653169014084507	0.775306758636002	1.0	linifanib;imatinib;WZ-7043
HDAC7	0.6457967564350542	1.0985101928455916	0.3725671918443002	0.772421622772889	1.0	apicidin;NCH-51;belinostat
SLC22A12	0.7260186660765066	1.0971896312268608	0.361271676300578	0.7732582447828191	1.0	sulfinpyrazone
SCN2A	0.6487655230474761	1.0971397106186194	0.3659454374412041	0.7701634162965406	1.0	phenytoin;zonisamide
CRHR1	0.8345285208438717	1.095860651576663	0.3717693836978131	0.7707250615681122	1.0	NBI-27914
CSNK1E	0.7299042088647837	1.0956302136251663	0.373358348968105	0.7682162124490437	1.0	WZ-3105
HTR1A	0.2936844201172999	1.0919343832252748	0.3268257411424439	0.7757291188834158	1.0	rotundine;quetiapine;clozapine;BMY-7378;isamoltane;BMY-14802;aripiprazole;pindolol;sumatriptan;ziprasidone;risperidone;zolmitriptan;cyanopindolol;olanzapine;RU-24969;spiperone;lurasidone;bromocriptine;adoprazine;brexpiprazole
PSEN1	0.8228047728151872	1.0904436025673128	0.37435367114788	0.776968752283951	1.0	JLK-6
NR5A1	0.7165387133250014	1.0868886410908007	0.3737185461323392	0.7840923667682397	1.0	BRD-A17664363;SID-7969543
PNP	0.7126244640108483	1.0847696922437933	0.3830188679245283	0.7872999835448927	1.0	hypoxanthine
NOS1	0.6241035560184497	1.0783907199313203	0.3964716805942432	0.8030028225924641	1.0	proadifen;myricitrin;2-iminobiotin
PSMB5	0.7149038103876383	1.076541478984208	0.4074436826640548	0.8019092198915473	1.0	carfilzomib
PSMB2	0.7149038103876383	1.076541478984208	0.4074436826640548	0.8019092198915473	1.0	carfilzomib
CACNA1B	0.5294101236757853	1.071040510899473	0.3954104148278906	0.8148151495381537	1.0	BRD-K56658166;gabapentin
GABBR1	0.415995639271391	1.0688924925046648	0.3675143560295324	0.8178488596154516	1.0	fenigam;alfaxalone;CGP-7930;abamectin;NCS-382;CGP-13501;CGP-55845;CGP-52432
TGFBR1	0.6291920845112333	1.0670104846398576	0.3892988929889299	0.8200777945376917	1.0	LY-364947;SB-431542;SB-525334
RORB	0.8042372124854941	1.0660307256266477	0.3962848297213622	0.8197109406821945	1.0	tretinoin
RAF1	0.5266079861933056	1.0621569261798922	0.4090909090909091	0.8276192607541337	1.0	AZ-628;GW-5074;sorafenib;regorafenib
ITGA5	0.7960246377242837	1.0611170841181938	0.4107485604606526	0.8241823658315188	1.0	ATN-161
ITGB1	0.7960246377242837	1.0611170841181938	0.4107485604606526	0.8241823658315188	1.0	ATN-161
TNF	0.4367828603788203	1.0576344410326404	0.4035532994923858	0.8307083094235703	1.0	pentoxifylline;CPI-1189;pomalidomide
MAPK7	0.6202350840648712	1.0564101449479255	0.4348230912476722	0.8311554901732733	1.0	XMD-892;XMD-885;BIX-02189
FFAR1	0.6883937403325726	1.0531649855837617	0.43611911623439	0.8372787167523448	1.0	GW-9508
SLC5A2	0.489618791013966	1.0515971380922366	0.4112399643175736	0.8387201531801111	1.0	dapagliflozin
HTR7	0.3937832584966003	1.0513186716876215	0.4108589951377633	0.8362705632776288	1.0	clozapine;methysergide;ziprasidone;mesulergine;olanzapine;spiperone;lurasidone
MCL1	0.6850108200258234	1.048162563734121	0.436399217221135	0.8416686268521837	1.0	gossypol
SLC22A11	0.7886154670158001	1.0480540112384649	0.4367924528301887	0.8387635537871704	1.0	probenecid
CACNA1G	0.4665875838126671	1.0463011909335795	0.4258121158911325	0.8402068110347101	1.0	benidipine;trimethadione;ethosuximide
ESRRG	0.7753444222929746	1.0397820885769682	0.4494047619047619	0.8546032163946998	1.0	DY-131
GRM5	0.4236163347454261	1.0378066176771337	0.4140017286084702	0.8569331572174995	1.0	SIB-1757;fenobam;MPEP;dipraglurant;SIB-1893
ADH1B	0.7747195524741869	1.0355087204251217	0.4516765285996055	0.8570271789884073	1.0	fomepizole
ADH1A	0.7747195524741869	1.0355087204251217	0.4516765285996055	0.8570271789884073	1.0	fomepizole
NQO1	0.7728449430178237	1.0319674277806326	0.4514811031664964	0.863628168770253	1.0	dicoumarol
DRD3	0.2928904864990672	1.0303586114371286	0.3991416309012875	0.8648141143077801	1.0	rotundine;clozapine;U-99194;dopamine;BP-897;haloperidol;sulpiride;cariprazine;risperidone
PDE1A	0.5524567883313447	1.0297991927076064	0.4734883720930232	0.8631621148528108	1.0	vinpocetine;W-13;propentofylline
TYR	0.5109365235246854	1.0273961924077315	0.4620087336244541	0.8665329345288969	1.0	monobenzone;exifone;arbutin;rucinol;azelaic-acid
HTR1B	0.3106914717160847	1.0266296950546598	0.4285714285714285	0.865324676693998	1.0	clozapine;isamoltane;methysergide;rizatriptan;aripiprazole;sumatriptan;ziprasidone;zolmitriptan
KDM1A	0.7658523521885321	1.0263409168566795	0.4627930682976554	0.8628700513317304	1.0	tranylcypromine
FRK	0.7659118635998452	1.0262431835768409	0.4583333333333333	0.8600442088351271	1.0	regorafenib
CYP2C19	0.3976417818379022	1.0261855206827688	0.4253164556962025	0.8571433014339077	1.0	carisoprodol;efavirenz;nelfinavir
TYMS	0.4022377583912767	1.0150466541983665	0.4361610968294773	0.8834483562038615	1.0	5-FP;fluorouracil;tegafur;pemetrexed
G6PD	0.7649299253131788	1.0128251024507406	0.4919678714859438	0.8860075535677006	1.0	BRD-K98404142
HDAC5	0.5393075470993438	1.0086377888202749	0.4849023090586146	0.8905816973379397	1.0	apicidin;NCH-51;belinostat
HDAC9	0.5393075470993438	1.0086377888202749	0.4849023090586146	0.8905816973379397	1.0	apicidin;NCH-51;belinostat
OPRK1	0.3486015569819703	1.0032702700661995	0.4527863777089783	0.9013174060926342	1.0	nalbuphine;ICI-204448;salvinorin-a;nor-binaltorphimine;U-54494A;5'-guanidinonaltrindole
MMP2	0.5876208897485492	1.0032430524412257	0.5053956834532374	0.8982021153327931	1.0	PD-166793;CTS-1027;marimastat
ORAI1	0.7532061772844942	1.0023249803896543	0.4964964964964965	0.897456302577186	1.0	MRS-1845
KEAP1	0.5875316173188515	1.0020031252083597	0.5121951219512195	0.8952011753474388	1.0	BRD-K93367411;BRD-K98948170;dimethyl-fumarate
TLR9	0.7541881155711607	1.0019418311982575	0.4960238568588469	0.8922360128809345	1.0	hydroxychloroquine
PTPN1	0.4656762824098214	1.001536575523507	0.4748936170212766	0.890158550998063	1.0	BRD-K86682249;dephostatin;ursolic-acid
CYP2C18	0.6618480352720948	1.0005890639695747	0.5126999059266227	0.8895866272172951	1.0	ifosfamide
GART	0.7454696938137888	0.9992117574296686	0.4870775347912525	0.8901083952017197	1.0	pemetrexed
CYP2D6	0.4673402868148624	0.996836155432288	0.485885372112917	0.8932295659649746	1.0	efavirenz;nelfinavir
SIRT1	0.4498016047822366	0.9965914427597248	0.466838931955211	0.8907684654393065	1.0	resveratrol;EX-527;sirtinol
KDM6A	0.7524027732317672	0.996215296542072	0.51252408477842	0.8856427945472019	1.0	GSK-J4
KDM6B	0.7524027732317672	0.996215296542072	0.51252408477842	0.8856427945472019	1.0	GSK-J4
ND1	0.7464516321004553	0.9956778066868336	0.5096359743040685	0.8840752280129286	1.0	rotenone
AVPR1B	0.5816396369587862	0.9943393321905108	0.5239410681399632	0.8844239853216831	1.0	desmopressin-acetate;mozavaptan;lypressin
GRIK2	0.7434165501234862	0.9933882686770176	0.5071496663489037	0.8836970296651917	1.0	SYM-2081
DHODH	0.5270756447078275	0.9923130631965752	0.5022706630336058	0.8835144691939398	1.0	teriflunomide;SC-12267;brequinar
PDE10A	0.4952259603526747	0.9902992072206552	0.486254295532646	0.8855301725858242	1.0	ibudilast;papaverine
CTSK	0.6467619460591107	0.9899919924179882	0.5281425891181989	0.8833353225941367	1.0	odanacatib
ADRB1	0.2919462782899475	0.9882708367506428	0.4870081662954714	0.8844810355591571	1.0	metoprolol;etilefrine;pindolol;carvedilol;nebivolol;isoprenaline;bisoprolol;nadolol;celiprolol;cimaterol;cyanopindolol;timolol;bopindolol;practolol;labetalol
ARFGAP1	0.7372571190525783	0.9872343215590412	0.5138613861386139	0.88410803410874	1.0	QS-11
SCN4A	0.7380605231053055	0.9858941081872834	0.5157790927021696	0.8814465673708474	1.0	zonisamide
SCN11A	0.7380605231053055	0.9858941081872834	0.5157790927021696	0.8814465673708474	1.0	zonisamide
PDE3B	0.7457970065760109	0.984730823219688	0.5257936507936508	0.8814023773573699	1.0	cilostamide
ACVR1C	0.7383878358675275	0.9842798086060552	0.5234215885947047	0.8796468270256481	1.0	SB-431542
HDAC10	0.4921766362395497	0.9841885275737512	0.5093666369313113	0.877029880420906	1.0	apicidin;NCH-51;PCI-34051
INS	0.7263665307822775	0.9821182639620332	0.5140845070422535	0.8793198606763398	1.0	lupanine
GLRB	0.5800669469815979	0.9805534535989524	0.5374087591240876	0.8801431568954066	1.0	enflurane
RORA	0.7325854732644985	0.9785436731343352	0.5352822580645161	0.8820750414115666	1.0	BRD-K20401833
PLA2G1B	0.6555377016009047	0.9784149206202484	0.5534351145038168	0.879615407197288	1.0	OBAA;cholic-acid
RNPEP	0.7262772636653079	0.9782057459087335	0.53	0.8744802798171021	1.0	ubenimex
LTA4H	0.7262772636653079	0.9782057459087335	0.53	0.8744802798171021	1.0	ubenimex
HDAC4	0.4906446789194157	0.9768289716200742	0.5126416739319966	0.8749275786347774	1.0	apicidin;NCH-51;belinostat
CYP2C8	0.4597032772286619	0.9750752493241824	0.5104529616724739	0.876377050979603	1.0	gemfibrozil;ifosfamide;isoniazid
PDE2A	0.7266938435444996	0.974751688173974	0.535	0.8743432790056126	1.0	EHNA
HSD11B1	0.4603036650798793	0.97240387301384	0.5110326566637247	0.8772303007684238	1.0	pyrrolidine-dithiocarbamate;enoxolone;ursolic-acid;adrenosterone
MMUT	0.7304133067515697	0.9715254927951318	0.5522682445759369	0.8764454054010467	1.0	cyanocobalamin
PDE9A	0.7231529145713691	0.9690551344105413	0.5433526011560693	0.8796125614412638	1.0	PF-04447943
PARP1	0.3570048056757826	0.968800378888812	0.5007849293563579	0.8773834621783883	1.0	veliparib;CS-1657;olaparib;iniparib
FNTA	0.4776641523205711	0.9687135226353883	0.5192135835567471	0.8748567203061538	1.0	lonafarnib;FTI-276;arglabin
CHRM1	0.2650182393372254	0.9682593184266178	0.5131004366812227	0.8731280868322754	1.0	nitrocaramiphen;clozapine;umeclidinium;SR-95639A;pipenzolate;BRD-K47448802;homatropine;aceclidine;telenzepine
FSHR	0.7221114648733895	0.9682124195749264	0.5427394438722966	0.8678356053628348	1.0	suramin
P2RY2	0.7221114648733895	0.9682124195749264	0.5427394438722966	0.8678356053628348	1.0	suramin
XDH	0.4489040388706828	0.9675244266956896	0.5200341005967605	0.8668415248000372	1.0	topiroxostat;oxypurinol;febuxostat;allopurinol
PLA2G2A	0.655745997738499	0.9667889249255044	0.5688259109311741	0.8659569237343697	1.0	varespladib;oleamide
SLC23A1	0.7261582408426817	0.966443140758664	0.5600403632694249	0.8640741194951099	1.0	ascorbic-acid
CNR2	0.3488541873785087	0.9654689103772888	0.5075939248601119	0.8636177203071194	1.0	JTE-907;JWH-015;palmitoylethanolamide;GW-405833
NFE2L2	0.5216005862985662	0.9654638532019022	0.5475974614687217	0.8610061769467515	1.0	eriodictyol;BRD-K91781484
SLC52A2	0.7362751807659118	0.9641424977190752	0.563265306122449	0.8612633410034578	1.0	NCS-382
GABBR2	0.4550489463253615	0.9640370334778988	0.5410544511668107	0.8589067045305142	1.0	fenigam;abamectin;NCS-382;CGP-55845
GCK	0.7219031749337935	0.9621436376704596	0.568762278978389	0.8604600154386421	1.0	Ro-28-1675
MYLK	0.6329401517970488	0.957352210971631	0.576303317535545	0.868791547777573	1.0	W-13
AGER	0.7152081411610676	0.9564839000964032	0.5618661257606491	0.867937183941358	1.0	benfotiamine
TLR4	0.560344004858122	0.95298517924781	0.5774395702775291	0.8732412234555094	1.0	ibudilast
SCD	0.7121433034784419	0.9524068222237332	0.5610997963340122	0.8718771818731647	1.0	MK-8245
ARG1	0.7120242806558157	0.951182767489098	0.5712871287128712	0.8695361933643855	1.0	inhibitor-BEC
ARG2	0.7120242806558157	0.951182767489098	0.5712871287128712	0.8695361933643855	1.0	inhibitor-BEC
KCNJ8	0.4234457581682667	0.9492729193403796	0.5370689655172414	0.8712966175344317	1.0	Y-26763;Y-27152;levcromakalim;cromakalim
NTSR2	0.7103282054333919	0.9480140854993108	0.5827552031714569	0.8714623274897196	1.0	levocabastine
POLB	0.7099116255542	0.9442444420773723	0.5908629441624366	0.8771131237393337	1.0	cytarabine
IDH1	0.6200083318455039	0.9405095813552354	0.6001917545541706	0.8827841852545275	1.0	AGI-5198;oxalomalic-acid
MTNR1A	0.4432059534777738	0.9393303285239958	0.5439512619669278	0.8827168296068798	1.0	ramelteon
F10	0.468533807398156	0.9392873327848724	0.5539130434782609	0.8802375210746971	1.0	apixaban;betrixaban;otamixaban
NFKB1	0.6224781289055525	0.9378589802621806	0.6164251207729469	0.8807928877554168	1.0	triflusal;arglabin
GSK3A	0.6256025709694697	0.9370073166064672	0.6112167300380228	0.8799175010366125	1.0	NSC-693868;indirubin
CA12	0.469369122882043	0.9330411430380292	0.5757314974182444	0.8859445819501908	1.0	diclofenamide;acetazolamide;zonisamide
NQO2	0.6960157110125866	0.9291031705818386	0.6120857699805068	0.8916750659428928	1.0	2-iodomelatonin
AR	0.2758703298170001	0.9267572511637788	0.5820783132530121	0.8941036536983004	1.0	ostarine;mifepristone;enobosarm;flutamide;tibolone
MLNR	0.500625345201966	0.9231579960319296	0.6001829826166514	0.899074044785782	1.0	camicinal
ACAT1	0.6967000922426876	0.92154953324701	0.6178781925343811	0.8998968048804303	1.0	CI-976
BCR	0.3784988322316788	0.921255545045393	0.5584307178631052	0.8980152019336151	1.0	rebastinib;imatinib
IL17A	0.6882494718362246	0.9182992667878696	0.6120331950207469	0.9017271132312742	1.0	SC-12267
GLRA1	0.4936166182503692	0.9179706414346348	0.608615948670944	0.8998946705645551	1.0	enflurane
ABCC9	0.5998545725610436	0.9171538776823508	0.6320754716981132	0.8991152873212646	1.0	pinacidil
MAPK14	0.320025746353512	0.915995295787622	0.5609756097560976	0.8990169330109731	1.0	doramapimod;ML-3163;PH-797804;VX-745;TAK-715;losmapimod;SC-68376;SB-239063;SB-203580;JX-401;VX-702
CHRNB2	0.5365720626834589	0.9116083354978936	0.6265822784810127	0.90554132380832	1.0	nicotine;UB-165
NFE2	0.6820900407653168	0.9088767463000323	0.6260504201680672	0.908808439533106	1.0	KU-C103428N
CFTR	0.4468027779611843	0.9066676197937136	0.5920934411500449	0.910838480741706	1.0	glafenine;CFTRinh-172;genistein
CHRNA9	0.6793525158449132	0.9056392763027776	0.6370967741935484	0.9078599292077996	1.0	nicotine
CHRNA10	0.6793525158449132	0.9056392763027776	0.6370967741935484	0.9078599292077996	1.0	nicotine
FGFR4	0.6036124501577099	0.9047980422701424	0.64	0.907096506846301	1.0	NVP-BGJ398;ponatinib
ADRA2C	0.3125123825374166	0.9042191762664548	0.5965189873417721	0.9057528338426852	1.0	clonidine;oxymetazoline
SLC6A2	0.2641760615969111	0.9027620817253146	0.6160781367392938	0.9062592033630364	1.0	dosulepin;nefazodone;clomipramine;venlafaxine;atomoxetine;maprotiline;tramadol;nisoxetine;amineptine;methylphenidate
SMO	0.4113444738831284	0.9018397432994368	0.5914260717410323	0.9056063443428648	1.0	SANT-1;vismodegib;purmorphamine
MMP9	0.6788764245544083	0.898179376597888	0.6569484936831875	0.9105363399968096	1.0	CTS-1027
ADH1C	0.5914122478128905	0.8962437143732455	0.6817325800376648	0.9120206281716	1.0	fomepizole;formononetin
PLAT	0.6731335733626923	0.894800927094121	0.6660098522167488	0.912465426699193	1.0	aminocaproic-acid
GRIN2A	0.4790767006779869	0.8912239067054879	0.6401006711409396	0.9171570798314322	1.0	dizocilpine;felbamate;NMDA
HRH4	0.4170881270578499	0.8893778377520962	0.6199484092863284	0.9182560510925613	1.0	clozapine;thioperamide
MYH2	0.6637902817865325	0.8884166772558332	0.6544046466602129	0.9176826797320478	1.0	blebbistatin
GRIN1	0.3557885235458128	0.8866212522946194	0.6160337552742616	0.9187758148424252	1.0	eliprodil;L-701252
PTGDR2	0.5173932450528194	0.8860084048533903	0.679403541472507	0.9175316513830684	1.0	ramatroban;indometacin;prostaglandin
GLP1R	0.662272740798048	0.8827437416070403	0.6832993890020367	0.921393634447374	1.0	geniposide
BRD2	0.5808237116581767	0.8814770014934942	0.6811023622047244	0.9166496665610444	1.0	I-BET-762
BRD3	0.5808237116581767	0.8814770014934942	0.6811023622047244	0.9166496665610444	1.0	I-BET-762
BRD4	0.5808237116581767	0.8814770014934942	0.6811023622047244	0.9166496665610444	1.0	I-BET-762
TOP2A	0.3037984392523877	0.881247286834844	0.6167615947925142	0.9146470771394593	1.0	BRD-K85853281;amonafide;teniposide;daunorubicin;mitoxantrone;etoposide
PI4KB	0.6576308507156248	0.879476708102881	0.6777996070726916	0.915608494890134	1.0	PIK-93
CES1	0.5803725525203832	0.877357013412062	0.6871455576559546	0.9172845491261034	1.0	cholic-acid;thenoyltrifluoroacetone
JUN	0.6537328532746153	0.8767872122041763	0.691	0.91604432182216	1.0	T-5224
AVPR1A	0.4122890243341219	0.8765613503321689	0.6230088495575221	0.9141250320467584	1.0	relcovaptan;desmopressin-acetate;mozavaptan;lypressin;conivaptan
CHUK	0.653286517689767	0.8758010791325184	0.68448098663926	0.9131563033453932	1.0	arctigenin
HSD11B2	0.6574225607760288	0.8746030011758508	0.6892822025565388	0.9129940246612106	1.0	adrenosterone
NOX4	0.6569464694855238	0.8744239690212746	0.6871945259042033	0.9109569783165824	1.0	apocynin
HRH3	0.330165152830205	0.8731632775195214	0.6232821341956346	0.9109930367422288	1.0	VUF-5681;proxyfan;thioperamide
DHH	0.6530187163388579	0.8727102448018796	0.6806122448979591	0.9071828960412566	1.0	taladegib
IHH	0.6530187163388579	0.8727102448018796	0.6806122448979591	0.9071828960412566	1.0	taladegib
FECH	0.655518195614009	0.8720577083166924	0.6822709163346613	0.9061162882361222	1.0	cholic-acid
MKNK1	0.6498051001279495	0.8718195046625805	0.6940948693126815	0.9041994923086332	1.0	CGP-57380
MET	0.3022704966601094	0.8716210209341321	0.6325396825396825	0.9022670664416972	1.0	BMS-777607;amuvatinib;MK-8033;MGCD-265;foretinib;golvatinib;SU-11274;PF-04217903;tivantinib;JNJ-38877605
PTGFR	0.4659068776814095	0.868198498402809	0.6672879776328052	0.906369788965494	1.0	latanoprost
VDAC2	0.6387954890350225	0.8675241017125416	0.6942307692307692	0.9053414112786168	1.0	erastin
JAK3	0.4001422912846712	0.8641548090955755	0.6403812824956673	0.9092991164918168	1.0	AT-9283;tofacitinib;KIN001-055
HDAC2	0.3273924530400122	0.8638511166919997	0.62944582299421	0.9076111314290296	1.0	givinostat;apicidin;panobinostat;NCH-51;MC1568;Merck60;belinostat;vorinostat
SPHK2	0.6496265658940101	0.8630310538403355	0.6975806451612904	0.9068859799544112	1.0	ABC-294640
CPS1	0.6456095456303745	0.8627890789932778	0.7092907092907093	0.9050608846227264	1.0	carglumic-acid
ALOX5	0.3352855402068951	0.8626578875414955	0.6419951729686243	0.9030214641689276	1.0	REV-5901;masoprocol;mesalazine;zileuton;hyperforin
CBR1	0.64781146784896	0.8605729764279884	0.7131147540983607	0.90457032497801	1.0	sofalcone
STAT1	0.6374267265748206	0.8602141080423401	0.672182006204757	0.9029373614810222	1.0	EMF-BCA1-64
SLC9A1	0.6405213199631029	0.8593903387402211	0.7108081791626095	0.9022191291682206	1.0	hexamethyleneamiloride
NR3C2	0.3227683500282012	0.858550481283063	0.6518578352180937	0.9015154650628112	1.0	potassium-canrenoate;nimodipine
HSD17B1	0.5662432157244093	0.8537702459822483	0.7164750957854407	0.9079881228733898	1.0	equilin
DGKA	0.6330228821376499	0.8533423884435083	0.7017017017017017	0.9065009910218522	1.0	R-59022
MAPK11	0.428689235670078	0.8525547026391299	0.672231985940246	0.9056050735965318	1.0	doramapimod;regorafenib;SB-239063;SB-203580
CA9	0.565508052877533	0.8524985548807287	0.7184643510054844	0.903472498520468	1.0	umbelliferone
SLC6A1	0.4483920150873297	0.8459824134155332	0.6601769911504425	0.9131794832903828	1.0	tiagabine
ITGB3	0.3983563518827591	0.8448781448462138	0.6755364806866953	0.9130185686807488	1.0	ATN-161;GR-144053;tirofiban;DU-728
CASP1	0.5552877462357914	0.8443174133358929	0.7459562321598477	0.9117683115141686	1.0	VX-765;BRD-K48969316
ESR1	0.2641287966504719	0.836301276318175	0.7027237354085603	0.9232045721144244	1.0	dienestrol;tibolone;estramustine-phosphate;fulvestrant;estrone;equol;alpha-estradiol;bazedoxifene;clomifene;raloxifene;estradiol
UGT1A6	0.6317433867944178	0.8353505162163912	0.7584789311408017	0.9225580117649452	1.0	deferiprone
SCNN1G	0.4861040866830067	0.8348466220003803	0.7218543046357616	0.9167322444262114	1.0	triamterene;amiloride
SCNN1B	0.4861040866830067	0.8348466220003803	0.7218543046357616	0.9167322444262114	1.0	triamterene;amiloride
SCNN1A	0.4861040866830067	0.8348466220003803	0.7218543046357616	0.9167322444262114	1.0	triamterene;amiloride
PRKACA	0.4877501796021302	0.8347270107985032	0.7266187050359713	0.9147109660116892	1.0	bucladesine;H-9
GRIN3A	0.6297795102210848	0.8347072336875894	0.748062015503876	0.9125373756908004	1.0	felbamate
TXNRD1	0.6172226024340167	0.8334324300311273	0.7342582710779082	0.9103401710637832	1.0	PX-12
TXN	0.6172226024340167	0.8334324300311273	0.7342582710779082	0.9103401710637832	1.0	PX-12
AXL	0.4904516853951567	0.8320724548935098	0.7220183486238532	0.910558147372292	1.0	BMS-777607
MAP2K5	0.6201981729996726	0.8305440131302944	0.7593528816986855	0.9109750360321306	1.0	BIX-02189
MYBPC3	0.617401136667956	0.8294442138534547	0.7618025751072961	0.9106117277255262	1.0	omecamtiv-mecarbil
ABCB1	0.3672254379616528	0.8253531920665043	0.68	0.9154412314749318	1.0	dofequidar
EPHB3	0.6098729431368465	0.8226477120101228	0.7630285152409046	0.9178668198691116	1.0	XMD-1499
ACO1	0.6199898830600767	0.8222997956259253	0.7658730158730159	0.9162910194523288	1.0	oxalomalic-acid
SLC6A4	0.2318384996368192	0.8207001173088473	0.7397260273972602	0.916751913790043	1.0	dosulepin;citalopram;nefazodone;clomipramine;venlafaxine;atomoxetine;trazodone;zimelidine;tramadol;minaprine;amineptine;alaproclate;escitalopram;BRD-A41630653
PDE4C	0.3626967851201138	0.8172933385710548	0.7087719298245614	0.9204244494280412	1.0	ibudilast;doxofylline;rolipram
CYP11B2	0.6059451899901804	0.8155661195721924	0.7668024439918534	0.9213108422888712	1.0	BRD-K76211160
HCK	0.6135626506382599	0.8134633123415704	0.7757575757575758	0.9205405749996473	1.0	bosutinib
CAMK2G	0.6135626506382599	0.8134633123415704	0.7757575757575758	0.9205405749996473	1.0	bosutinib
CEL	0.605855922873211	0.8128711504770445	0.79313824419778	0.9193197502898192	1.0	taurocholic-acid
RAMP1	0.6137709405778558	0.8110859549687045	0.7839195979899497	0.920259446787505	1.0	telcagepant
ACAA2	0.6055286101109887	0.8093008378998278	0.7854368932038835	0.9209965599143564	1.0	trimetazidine
APP	0.4742930722464977	0.8084998179939861	0.7774750227066304	0.9202105899255598	1.0	phenserine
RAB9A	0.6056178772279585	0.8066658750810954	0.7927835051546391	0.9210615374076832	1.0	benzoic-acid
EPHB4	0.6013330556134138	0.8046416130023604	0.7965056526207606	0.9222984937827176	1.0	NVP-BHG712
PTAFR	0.3983838738630605	0.8044096861180122	0.7321739130434782	0.9205468134678844	1.0	ABT-491
GLRA2	0.5297198065070157	0.803932130610977	0.7909176915799432	0.9192355368739306	1.0	picrotoxin
TSPO	0.4679904677070292	0.803713882972011	0.7626168224299066	0.9175253376064646	1.0	FGIN-1-43
ADRA2A	0.2395948176471317	0.8021953755189388	0.7589082638362395	0.9179297076536932	1.0	imiloxan;clonidine;oxymetazoline
ADRA1D	0.2786888783522697	0.8020154258674933	0.7149643705463183	0.9161825343923894	1.0	BMY-7378;oxymetazoline;carvedilol;terazosin;doxazosin
PYGL	0.6043383818847263	0.8011725769319265	0.8044579533941236	0.9154543118828606	1.0	tagatose
F2R	0.5960960514178594	0.7988041839301941	0.7852216748768472	0.9171193600279264	1.0	SCH-79797
ATM	0.3909126858836989	0.7985474263475117	0.7268683274021353	0.915480632449461	1.0	KU-60019;KU-55933
MPO	0.5899068646412948	0.7914192883145448	0.8315481986368062	0.92461048265402	1.0	DMP-777
HTR2C	0.2220983179006304	0.7900661517708099	0.782766111513396	0.9246669484819046	1.0	clozapine;nefazodone;methysergide;trazodone;WAY-629;aripiprazole;mCPP;ziprasidone;risperidone;mesulergine;lorcaserin;olanzapine;ketanserin
PDE8A	0.5948165560746272	0.7890622891995636	0.8336713995943205	0.9200313391420551	1.0	dipyridamole
PDE7B	0.5948165560746272	0.7890622891995636	0.8336713995943205	0.9200313391420551	1.0	dipyridamole
PDE8B	0.5948165560746272	0.7890622891995636	0.8336713995943205	0.9200313391420551	1.0	dipyridamole
EDNRA	0.3365091095716248	0.7855340411199134	0.7443609022556391	0.9235035235052228	1.0	FR-139317;atrasentan
SMAD3	0.5846698604457404	0.7848907749573888	0.8136769078295342	0.9224826162270728	1.0	KU-C103871
PLK3	0.5895795518790727	0.7848818740168981	0.8262135922330097	0.9204519007412458	1.0	GW-843682X
NR1H3	0.4641421843941152	0.7841076341145397	0.7924701561065197	0.9175272338872098	1.0	T-0901317;GW-3965
NR1H2	0.4641421843941152	0.7841076341145397	0.7924701561065197	0.9175272338872098	1.0	T-0901317;GW-3965
SUV39H1	0.5845508376231142	0.7841073797225578	0.8057199211045365	0.9155062487905418	1.0	chaetocin
SCN3A	0.3539184393877074	0.7812957063067049	0.735581188997338	0.917721032439102	1.0	zonisamide;carbamazepine;lacosamide;rufinamide
IKBKB	0.3660415144597126	0.7812725894287296	0.7523564695801199	0.9157411997961832	1.0	flavokavain-b;BMS-345541;TPCA-1
EGFR	0.221566270843473	0.7808705119433627	0.8004434589800443	0.914327361808687	1.0	CGP-53353;WZ-4002;lavendustin-c;angiogenesis-inhibitor;alvocidib;pelitinib;AST-1306;erlotinib;AG-957;LFM-A12;CGP-52411;AG-494;PD-158780
SLC18A3	0.585919600083316	0.780497534044816	0.8316221765913757	0.912910047229988	1.0	vesamicol
MMP7	0.5875859196000833	0.7776561421463778	0.8518886679920478	0.9152219257511977	1.0	marimastat
GLRA3	0.4554774340357727	0.7775007838525927	0.8014505893019039	0.913488141771552	1.0	picrotoxin
ICAM1	0.5840152349212961	0.7739131703811997	0.8565697091273822	0.916882938912744	1.0	polydatin
ADORA2A	0.273788400941973	0.7725862542530874	0.7729468599033816	0.9168691461395374	1.0	regadenoson;pentoxifylline
CHRNA3	0.5116050705231209	0.7725602931541926	0.8342749529190208	0.9149306324373224	1.0	UB-165;cytisine
TRPM8	0.5743743862885706	0.7722254153927305	0.8365287588294652	0.9134398502869764	1.0	icilin
CAMK2A	0.3836159381021706	0.7670996364353421	0.7720391807658059	0.919064240652804	1.0	lavendustin-c
ROCK1	0.3585246078206723	0.7652113359693171	0.7522281639928698	0.919795191000397	1.0	GSK-429286A;fasudil;hydroxyfasudil;Y-27632
DRD4	0.247952312173891	0.7644323621920956	0.8185358255451713	0.9189365121938018	1.0	clozapine;dopamine;haloperidol;ABT-724;risperidone;olanzapine;spiperone;bromocriptine;rotigotine
UGT1A1	0.5720831969530158	0.7637962456074852	0.8433981576253838	0.915936666913108	1.0	dolutegravir
POU2F2	0.5720831969530158	0.7637962456074852	0.8433981576253838	0.915936666913108	1.0	dolutegravir
PPAT	0.5677686196328146	0.7612054314134099	0.869177403369673	0.9176719447957916	1.0	azathioprine
GPR55	0.5708334573154402	0.7600143644921663	0.8708414872798435	0.9174502881683648	1.0	CP-55940
PDHA1	0.5643467134823101	0.7583212624069857	0.854	0.9178827314493984	1.0	CPI-613
CPT1A	0.5022588243213278	0.7530155449495065	0.8549471661863592	0.9232250559711151	1.0	etomoxir
SLC6A3	0.2660733449608066	0.7493478707760173	0.7952622673434856	0.9263919760602513	1.0	diphenylpyraline;atomoxetine;safinamide;methylphenidate
XPO1	0.5674115511649358	0.7491963313474888	0.8720472440944882	0.9246882641122738	1.0	7b-cis
SSTR3	0.4990000162097536	0.7491668058618669	0.8545454545454545	0.9208528621586736	1.0	pasireotide
SSTR1	0.4990000162097536	0.7491668058618669	0.8545454545454545	0.9208528621586736	1.0	pasireotide
CXCR3	0.5670247269914006	0.7484521239203088	0.8673978065802592	0.91992735429069	1.0	AMG-487
PDE4B	0.2874853699246854	0.7455790242611778	0.7971737323358271	0.9219423508353872	1.0	ibudilast;pentoxifylline;doxofylline;rolipram
MMP8	0.5553009789627161	0.7389979393560744	0.890020366598778	0.929125132939558	1.0	doxycycline
SOD2	0.5480703424881721	0.7275840130570216	0.9164237123420796	0.940714465958637	1.0	tetraethylenepentamine
SOD1	0.5480703424881721	0.7275840130570216	0.9164237123420796	0.940714465958637	1.0	tetraethylenepentamine
S1PR2	0.5336983366560537	0.7167107767946687	0.9142857142857144	0.9530470227190716	1.0	JTE-013
ASIC2	0.5317047043770643	0.714202085530438	0.9292929292929292	0.9523065899679124	1.0	amiloride
ASIC1	0.5317047043770643	0.714202085530438	0.9292929292929292	0.9523065899679124	1.0	amiloride
P2RX2	0.537120242806558	0.7131325970047212	0.9247967479674796	0.9496311344440386	1.0	ormetoprim
P2RX3	0.537120242806558	0.7131325970047212	0.9247967479674796	0.9496311344440386	1.0	ormetoprim
HTR3B	0.4734050075073608	0.7113813921218797	0.895609756097561	0.949848727795523	1.0	N-methylquipazine
TUBB1	0.5287291338114082	0.7075396330041176	0.9395770392749244	0.952754462967568	1.0	colchicine
CERS1	0.5281935311095902	0.7044697698633526	0.937178166838311	0.9546256596912858	1.0	fumonisin-b1
ACSL1	0.5178980569524206	0.6903438916242695	0.9619238476953909	0.9699763977690932	1.0	triacsin-c
RUNX1	0.5134644568095932	0.6859295176968666	0.9770687936191426	0.973350171501095	1.0	BRD-K19059335
CDIPT	0.5134347011039366	0.6820661985011864	0.9699321047526672	0.9760031105920004	1.0	inositol
AKR1C3	0.3995989441736033	0.680253468146785	0.880708294501398	0.9761602029037482	1.0	rutin
CYSLTR2	0.5116196030588865	0.678271952048567	0.9781529294935452	0.9764773861262148	1.0	pranlukast
DHFR	0.3332576033258821	0.6774903367091673	0.8710247349823321	0.9753385371334768	1.0	methotrexate;succinylsulfathiazole;pemetrexed
ADORA1	0.2207000538494484	0.6743930373137269	0.9108678655199376	0.9768889266456816	1.0	etofylline;DPCPX;doxofylline;SLV-320;SDZ-WAG-994;PSB-1115;CGS-21680
CAMKK1	0.5018299758978784	0.6735682564850515	0.9951969260326607	0.9738891971238058	1.0	STO-609
CAMKK2	0.5018299758978784	0.6735682564850515	0.9951969260326607	0.9738891971238058	1.0	STO-609
MMP3	0.3950967122266914	0.6620386863611221	0.900626678603402	0.9817172536391874	1.0	PD-166793;CTS-1027
SSTR5	0.390160459659387	0.6599689878696753	0.8895078922934077	0.9789583434202912	1.0	pasireotide
SSTR2	0.390160459659387	0.6599689878696753	0.8895078922934077	0.9789583434202912	1.0	pasireotide
MMP13	0.3549269000384407	0.6540819676289724	0.8986899563318778	0.9800228139003178	1.0	PD-166793
ITGA2B	0.3770986961627566	0.6444781358785958	0.8989990900818926	0.9827920656108622	1.0	tirofiban;DU-728
PKM	0.429804242318709	0.6429787660118004	0.931640625	0.9815570740415704	1.0	BRD-K61106942
AVPR2	0.3184743857758742	0.6386295008532507	0.9055755395683454	0.9817005565176516	1.0	desmopressin-acetate;mozavaptan;lypressin;conivaptan
CHRM2	0.198907223002775	0.6348120435862233	0.9465408805031448	0.981603731852768	1.0	clozapine;bethanechol
PTGIR	0.3281022021608398	0.6130605405802669	0.92149866190901	0.9893705444931876	1.0	carbacyclin;BMY-45778
S1PR1	0.3983719082049858	0.6087899254158763	0.9465095194922938	0.9892058444619672	1.0	SEW-2871
REN	0.4016597023581656	0.6071980350904032	0.9538904899135446	0.9879606347160206	1.0	VTP-27999
ADRB2	0.1655599878627299	0.5911313628493657	0.9782451051486584	0.9922171307638544	1.0	metoprolol;ICI-118551;pindolol;salbutamol;carvedilol;isoprenaline;nadolol;celiprolol;cimaterol
KCNA5	0.3122184198268617	0.585833544856349	0.9410211267605634	0.9922647332264194	1.0	BAPTA-AM
SLC12A1	0.2478173096853085	0.5815496425463715	0.9541206457094308	0.991900741061206	1.0	torasemide;furosemide;tienilic-acid
BCL2	0.2480096678941161	0.5776549547021298	0.9542372881355932	0.9912339708516116	1.0	gossypol;BRD-K01265221
OPRM1	0.2078161091141181	0.5769990601045215	0.9611499611499612	0.9895205871909716	1.0	nalbuphine;lobelanidine;tramadol;leu-enkephalin;alvimopan
ALOX12	0.3351867913608081	0.5692531665820411	0.9507609668755596	0.9900548729639808	1.0	eicosatetraynoic-acid
NR1I2	0.2322720234409399	0.5551083382919643	0.9606365159128978	0.9923888432460598	1.0	enilconazole
PDE3A	0.2151253046960173	0.5481259002885033	0.972568578553616	0.992419563966527	1.0	ibudilast
ERBB2	0.1923064163094484	0.5443455312304512	0.9780309194467046	0.9915091162074526	1.0	WZ-4002;CP-724714;AST-1306
SLC8A1	0.3080806163833745	0.5316766029217883	0.9759481961147086	0.9927664605113348	1.0	CGP-37157
CYP19A1	0.2069346391377979	0.5168436435903806	0.980672268907563	0.9940857864947128	1.0	enilconazole
PTPRS	0.3344287856760621	0.5059706923598531	0.9824046920821116	0.9942770757919516	1.0	etidronic-acid
ITGAV	0.3212616956687066	0.4849967674887364	0.9922630560928434	0.9955715658733422	1.0	ATN-161
METAP2	0.285237810132833	0.4303306301368715	1.0	0.9987790296765378	1.0	fumagillin
GHSR	-0.3121466404808665	-0.4920155213116829	0.9883227176220808	0.9932270757285042	1.0	anamorelin;L-692585
CYSLTR1	-0.2177846556752574	-0.4928528902882131	0.9859320046893316	0.995932249727233	1.0	montelukast;SR-2640;zafirlukast;pranlukast;cinalukast;tomelukast
CYP11B1	-0.3282449562578111	-0.5115722181122586	0.9811912225705328	0.995218826729184	1.0	mitotane;metyrapone
PLG	-0.3268761530679045	-0.5172793033926941	0.966497461928934	0.9969184981996198	1.0	tranexamic-acid;aminocaproic-acid
ADA	-0.273330555886204	-0.5389395713281094	0.965675057208238	0.9944383704600104	1.0	cladribine;vidarabine;dipyridamole;EHNA
ADORA2B	-0.2042479002111626	-0.5611254663454373	0.97636815920398	0.9906783331540858	1.0	adenosine;ZM-241385;theophylline;CGS-15943;enprofylline;aminophylline;caffeine;NECA
LTF	-0.3610553564448955	-0.5654133123419066	0.95625	0.99220446814371	1.0	parecoxib
TLR7	-0.2898441182056283	-0.575545236801325	0.9507445589919816	0.9915169375184556	1.0	resiquimod
HCRTR1	-0.3032467540415538	-0.6003195941583467	0.9437939110070258	0.984684746463956	1.0	almorexant;SB-334867
FGFR2	-0.251988204336963	-0.6028317133844991	0.9420289855072465	0.98652939814599	1.0	dovitinib;lucitanib
CYP2E1	-0.3490254426424639	-0.6184073048217819	0.9087912087912088	0.9825600535638214	1.0	ritonavir;phenethyl-isothiocyanate;isoniazid
ROCK2	-0.3114510177359838	-0.6187146263376333	0.9079822616407982	0.9852966751152402	1.0	Y-39983;ripasudil;Y-27632;fasudil
S1PR4	-0.3965363327977146	-0.619358680555634	0.905742145178765	0.9878828118067084	1.0	fingolimod;BRD-K12401458
GUCY1A1	-0.3465258146109209	-0.6248438065799685	0.8947368421052632	0.9882442832189208	1.0	isosorbide-dinitrate;riociguat;molsidomine
SLC29A1	-0.4051955008034279	-0.6328837034962985	0.8855359001040582	0.9872123740457563	1.0	dilazep;dipyridamole
CXCR1	-0.4085877521871094	-0.6383870038512673	0.8870636550308009	0.9873850320031052	1.0	reparixin;navarixin
SLC25A4	-0.4107897399273939	-0.63932125488944	0.8901437371663244	0.9898592690523186	1.0	clodronic-acid;bongkrek-acid
TOP1	-0.2623214285714286	-0.6540110112122633	0.9007981755986316	0.9849369942482477	1.0	camptothecin;TAS-103;bisbenzimide;irinotecan;SN-38;aclarubicin;topotecan;genz-644282
IL1B	-0.3721577831793006	-0.6600254846177844	0.8649789029535865	0.9844718691649856	1.0	tanshinone-iia
PRSS1	-0.4221989327863295	-0.6619377526591856	0.8815653964984552	0.986127437339324	1.0	camostat-mesilate
FOXM1	-0.5048650578748475	-0.665542657112605	0.9939577039274924	0.9862346023021455	1.0	thiostrepton
GRM4	-0.284925716743574	-0.6711533555201047	0.8677884615384616	0.983447045211274	1.0	PHCCC;VU-0366037-2
DHPS	-0.5041806766447466	-0.6741290044797688	0.9940357852882704	0.982722845385291	1.0	sulfaphenazole
CRBN	-0.3786373634395429	-0.676101220409569	0.8325942350332595	0.983124996538822	1.0	thalidomide
CCND1	-0.5102805963043414	-0.6762975115728119	0.9801783944499504	0.9859051856756236	1.0	arcyriaflavin-a
SIGMAR1	-0.2432030378409166	-0.6790284406463092	0.896551724137931	0.985349763756986	1.0	BD-1063;4-IBP;cutamesine
CYCS	-0.4358110002448387	-0.6917609770471769	0.8445378151260504	0.9714791148415493	1.0	MT-21
SLC12A2	-0.3914281818721777	-0.6935616089100568	0.8297644539614561	0.9719745151414592	1.0	piretanide
ASAH1	-0.5244740679025204	-0.6965647072348796	0.952047952047952	0.9708705552166668	1.0	DL-PDMP
ABCA1	-0.5247418692534294	-0.6974836092324982	0.949654491609082	0.9726699287474876	1.0	probucol
TP53	-0.3299172240705519	-0.7022449618260875	0.8308571428571428	0.9692108463513924	1.0	mepacrine
PLA2G7	-0.5355431904067605	-0.7067391325222228	0.9453280318091452	0.9657369866974228	1.0	darapladib
FGFR1	-0.2304495821315207	-0.7067569775812977	0.8746630727762803	0.9687218219469808	1.0	danusertib;dovitinib;lucitanib;nintedanib
CNR1	-0.2306491796837338	-0.7069494617510842	0.868	0.9714872074099868	1.0	AM-251;lylamine;AM-281;BAY-59-3074
F2	-0.3595534853403087	-0.7072420183505058	0.8127962085308057	0.9741512438630306	1.0	argatroban
EDNRB	-0.3569733851969893	-0.7076810288789169	0.8078602620087336	0.976631211477494	1.0	ambrisentan
RPS6KA3	-0.4576861274772362	-0.7138832367818001	0.8401323042998897	0.9706958345170164	1.0	BI-D1870;KIN001-242
SCNN1D	-0.5352456333501949	-0.7140300158826447	0.929563492063492	0.9736017474790324	1.0	benzamil
KPNB1	-0.5417323771833249	-0.718656825307043	0.929563492063492	0.9701019992366297	1.0	importazole
CXCR2	-0.4085999107275703	-0.7191603894968459	0.7890710382513662	0.972470258516369	1.0	reparixin;SB-225002;navarixin
ABAT	-0.4069430870340439	-0.7245116243120496	0.7974828375286042	0.967632108264289	1.0	vigabatrin;valproic-acid
TPH1	-0.5400065462552445	-0.7247651975910873	0.9173469387755102	0.9703650527265024	1.0	telotristat
CA6	-0.4693804677736118	-0.7277528299576899	0.8131749460043196	0.9688756788494366	1.0	ellagic-acid;mafenide
NTRK2	-0.5482488767221115	-0.7299594415457203	0.8998988877654196	0.9687144682447671	1.0	dihydrodeoxygedunin
GSR	-0.5508376231142321	-0.7316556753822319	0.9018036072144288	0.9693224346570436	1.0	carmustine
BIRC5	-0.5491415478918082	-0.7344715208629246	0.9042871385842473	0.9682457852410676	1.0	YM-155
DPEP1	-0.5472074270241319	-0.7362359316517343	0.9113247863247864	0.9686954032694772	1.0	cilastatin
AGTR2	-0.3796975784431537	-0.7418226953903201	0.7788018433179723	0.9634640719384612	1.0	azilsartan
ERBB4	-0.3477665684611493	-0.745543588981711	0.774712643678161	0.9608183152123444	1.0	canertinib;neratinib;dacomitinib;afatinib;BMS-599626
CHRM3	-0.2096112311012463	-0.7469035637857561	0.8615384615384616	0.9618509894696092	1.0	DAU-5884;diphenidol;scopolamine;tolterodine;amitriptyline;cevimeline;glycopyrrolate;darifenacin;ipratropium;oxybutynin
PRKCG	-0.5590799535810992	-0.7509394408443048	0.8835143139190523	0.9587356767586352	1.0	EI-273
JAK2	-0.2702579457938965	-0.7560267750026815	0.777363184079602	0.9539852465274572	1.0	pacritinib;AG-490;tozasertib
PNLIP	-0.484310870245978	-0.7581458060882539	0.7722457627118644	0.9538953305024538	1.0	orlistat
DDR1	-0.485298296087178	-0.7587948471834384	0.7844559585492228	0.9560398054411836	1.0	ALW-II-38-3
FOLR2	-0.5788079864313982	-0.7662860760098624	0.8516992790937178	0.9471689451005147	1.0	folic-acid
OXTR	-0.5762787514505907	-0.7746268299836266	0.8500496524329693	0.9370709370866872	1.0	L-368899
TBXAS1	-0.4397619373057433	-0.7756049429493104	0.7200854700854701	0.9386012850225656	1.0	dazmegrel
EIF2S1	-0.5809206415330139	-0.7764236705710836	0.8493803622497617	0.9405099293670316	1.0	salubrinal
PTGER3	-0.3990760411787114	-0.7823944188916004	0.7265353418308227	0.9339637658810728	1.0	dinoprostone;dinoprost
ABL1	-0.2538653730712987	-0.7842899168390464	0.7896825396825397	0.9338841069920958	1.0	dasatinib;flumatinib;tozasertib;LDN-212854
SLC6A9	-0.4490472702631584	-0.7899438808300723	0.7279569892473118	0.9276599193149334	1.0	bitopertin
NR4A1	-0.5972267682328086	-0.7905777102255053	0.8148893360160966	0.9298123442127614	1.0	cytosporone-b
CYP2A6	-0.3974226307011588	-0.7912489026820678	0.713963963963964	0.9319326940507529	1.0	methoxsalen
ACACA	-0.5898175975243253	-0.7918701784665085	0.8188976377952756	0.9341620361937888	1.0	KD-023
ACACB	-0.5898175975243253	-0.7918701784665085	0.8188976377952756	0.9341620361937888	1.0	KD-023
HTR2B	-0.2298608696960096	-0.7956310797431598	0.7835195530726257	0.9341844920119666	1.0	ritanserin;tegaserod;mianserin
IMPDH1	-0.3766053150280321	-0.7969015535061277	0.6997742663656885	0.9353650771055316	1.0	thioguanine;ribavirin
MALT1	-0.6014223227303835	-0.8004652593511642	0.8003913894324853	0.9324156219117758	1.0	mepazine
KCNQ1	-0.4080289877203643	-0.8051768356845129	0.6980306345733042	0.9278639726867424	1.0	flupirtine;azimilide
ITPR1	-0.6169845567887643	-0.8105334744753179	0.7962413452027696	0.9217986749368487	1.0	caffeine
KCNQ5	-0.6035052221263427	-0.8137745418973196	0.7688492063492064	0.9194364136603936	1.0	retigabine
KCNQ4	-0.6035052221263427	-0.8137745418973196	0.7688492063492064	0.9194364136603936	1.0	retigabine
S100A9	-0.6126402237629066	-0.8183617995958458	0.7536082474226804	0.9179821362759096	1.0	tasquinimod
ADCY1	-0.6199601273544202	-0.8206401090610098	0.7770204479065238	0.9173621358610028	1.0	SQ-22536
HSD3B1	-0.6159431070907847	-0.8215751198744403	0.7722772277227723	0.9191215426248136	1.0	androstenedione
NOX1	-0.6196625702978547	-0.8241022440291061	0.7581764122893955	0.9181346841393906	1.0	BRD-K26947839
AMY2A	-0.618085517898057	-0.8287889948154361	0.7695431472081218	0.9133286304650146	1.0	acarbose
NISCH	-0.4196226639685751	-0.8293413753327645	0.6860335195530727	0.91569507614207	1.0	moxonidine;rilmenidine;nandrolone;AGN-192403
RPS6KA1	-0.6191269675960366	-0.8331016352902022	0.7559139784946236	0.9122996932107508	1.0	BI-D1870
RPS6KA2	-0.6191269675960366	-0.8331016352902022	0.7559139784946236	0.9122996932107508	1.0	BI-D1870
PTGER4	-0.4227971159776334	-0.8354298366693447	0.6461716937354989	0.9150640671674054	1.0	dinoprostone;dinoprost
KCND2	-0.632814592198054	-0.8354671318967599	0.7583417593528817	0.918396430023928	1.0	dalfampridine
KCNC2	-0.632814592198054	-0.8354671318967599	0.7583417593528817	0.918396430023928	1.0	dalfampridine
KCNA6	-0.632814592198054	-0.8354671318967599	0.7583417593528817	0.918396430023928	1.0	dalfampridine
KCNB2	-0.632814592198054	-0.8354671318967599	0.7583417593528817	0.918396430023928	1.0	dalfampridine
KCND3	-0.632814592198054	-0.8354671318967599	0.7583417593528817	0.918396430023928	1.0	dalfampridine
KCNC3	-0.632814592198054	-0.8354671318967599	0.7583417593528817	0.918396430023928	1.0	dalfampridine
KCND1	-0.632814592198054	-0.8354671318967599	0.7583417593528817	0.918396430023928	1.0	dalfampridine
KCNA1	-0.632814592198054	-0.8354671318967599	0.7583417593528817	0.918396430023928	1.0	dalfampridine
KCNA7	-0.632814592198054	-0.8354671318967599	0.7583417593528817	0.918396430023928	1.0	dalfampridine
KCNA4	-0.632814592198054	-0.8354671318967599	0.7583417593528817	0.918396430023928	1.0	dalfampridine
KCNB1	-0.632814592198054	-0.8354671318967599	0.7583417593528817	0.918396430023928	1.0	dalfampridine
KCNA2	-0.632814592198054	-0.8354671318967599	0.7583417593528817	0.918396430023928	1.0	dalfampridine
KCNA10	-0.632814592198054	-0.8354671318967599	0.7583417593528817	0.918396430023928	1.0	dalfampridine
KCNC1	-0.632814592198054	-0.8354671318967599	0.7583417593528817	0.918396430023928	1.0	dalfampridine
CHRNA7	-0.3585649803846394	-0.8360020646868743	0.67497034400949	0.9675162506440452	1.0	PNU-120596;PNU-282987
TRPV1	-0.3063836072965373	-0.8371085895521045	0.671604938271605	0.9693699851424676	1.0	SB-366791;AM-404;AMG-9810;SB-705498;capsazepine;olvanil
ITGA4	-0.6326955693754278	-0.8400327117774821	0.759467758444217	0.9678110630326956	1.0	firategrast
HSD3B2	-0.6330228821376499	-0.8406616048845262	0.7532082922013821	0.9704317772569032	1.0	trilostane
HDAC3	-0.3291290157984227	-0.8410744941903441	0.6662665066026411	0.973446886108724	1.0	mocetinostat
HTR2A	-0.1890169701696618	-0.84164634422659	0.8045774647887324	0.976227822555934	1.0	GR-127935;cyclobenzaprine;thiothixene;ritanserin;TFMPP;thioridazine;amoxapine;iloperidone;blonanserin;mianserin
PLD2	-0.631802898205731	-0.8416631788082773	0.7370517928286853	0.9800994543236184	1.0	CAY-10594
SLC1A1	-0.6254946886065403	-0.8426978572760362	0.7243186582809225	0.9819217737294644	1.0	DL-TBOA
SLC1A3	-0.6254946886065403	-0.8426978572760362	0.7243186582809225	0.9819217737294644	1.0	DL-TBOA
CYP17A1	-0.3998522230133675	-0.845199792742172	0.6427758816837316	0.9849086396199688	1.0	progesterone
ODC1	-0.629839021632398	-0.8460217005711775	0.7273603082851637	0.9872640214524266	1.0	eflornithine
GNPTAB	-0.6440027375249204	-0.8514317414199284	0.7153209109730849	0.9803500337575616	1.0	tunicamycin
PDE4A	-0.2673443376875092	-0.8551975277320243	0.6529801324503312	0.9773239593722302	1.0	piclamilast;Ro-20-1724;YM-976
CCKAR	-0.3699795038616144	-0.855749494925023	0.6329849012775842	0.9802970987914612	1.0	proglumide;lorglumide;devazepide
TUBB3	-0.6445383402267385	-0.859175530941209	0.7147087857847977	0.9777958715401002	1.0	ixabepilone
CASP9	-0.6509953283542119	-0.8611318937579778	0.7279260780287474	0.9781919322695254	1.0	NS-3694
FNTB	-0.6488231618412831	-0.8612028708041947	0.6993987975951904	0.9821162955634788	1.0	tipifarnib-P2
AHR	-0.4401473844163034	-0.8617523200036609	0.6291759465478842	0.9850987846683618	1.0	stemregenin-1;BRD-K61463582
ADRB3	-0.3138590709480902	-0.869128547170252	0.6183006535947713	0.974953124265822	1.0	L-755507;CGP-12177;ZD-7114
CAPN1	-0.6543577230934032	-0.8771791455492834	0.6693227091633466	0.9632529801413188	1.0	MDL-28170
PRKCQ	-0.4895820346833844	-0.8798290836314273	0.6104712041884817	0.9621003091671374	1.0	GSK-690693
ADK	-0.659029368881483	-0.8818389016913787	0.6738916256157635	0.9621676426099732	1.0	ABT-702
PDPK1	-0.4223511286035251	-0.8820643957979758	0.6097271648873073	0.965787313460766	1.0	GSK-2334470
HIF1A	-0.4454361164865443	-0.8834112118244052	0.5997666277712952	0.967190352337998	1.0	VU-0418946-1
PTK6	-0.6622727407980481	-0.8891358555538394	0.6535269709543569	0.9598967909947524	1.0	vandetanib
XIAP	-0.3598119128187189	-0.8913107664993497	0.5789473684210527	0.9595842096260024	1.0	BRD-A05680309;BRD-A94297859
GCGR	-0.5711487173080574	-0.8948533862328995	0.6244813278008299	0.9565654249177784	1.0	MK-0893
TTK	-0.6763471895736007	-0.8950901150208933	0.6595744680851063	0.9602071570473304	1.0	pyrazolanthrone
PTGER2	-0.417398723355707	-0.8958170526358185	0.5574912891986062	0.9629301553141562	1.0	dinoprostone;alprostadil;iloprost
HTR6	-0.2806519928076361	-0.8960259962028801	0.6105834464043419	0.9666281536011818	1.0	amoxapine;iloperidone;mianserin;loxapine;5-methoxytryptamine;amitriptyline
CHRNA1	-0.672746749189157	-0.8966575355904444	0.6628748707342296	0.9695896664021502	1.0	adiphenine
DRD2	-0.1943382033751633	-0.8984658012372081	0.6756238003838771	0.9699890964527292	1.0	perphenazine;flupentixol;promazine;YM-09151-2;domperidone;trifluoperazine;thioridazine;amoxapine;iloperidone;blonanserin;prochlorperazine;fluphenazine;mianserin
SELP	-0.6766149909245098	-0.8987225706428553	0.6699900299102692	0.9738111415343884	1.0	KF-38789
CCR5	-0.5816799756430417	-0.9016474245786092	0.6394984326018809	0.971817825110709	1.0	vicriviroc
DMD	-0.667212187937037	-0.903727169920399	0.633816425120773	0.9719151218626002	1.0	ataluren
ALDH5A1	-0.6779242419733984	-0.9076277107113312	0.6337448559670782	0.9678523681127968	1.0	valproic-acid
BIRC2	-0.6804832326598625	-0.9109775935045888	0.6288951841359773	0.9648971614258038	1.0	birinapant
PDE4D	-0.3398413779152694	-0.9134179150774938	0.5560916767189384	0.9639424500787852	1.0	piclamilast;Ro-20-1724
HCRTR2	-0.5814748315078349	-0.9138595677593732	0.621978021978022	0.9674020550347008	1.0	almorexant
BCL2L2	-0.5854906861869904	-0.914164873884854	0.6257861635220126	0.9712507174392448	1.0	ABT-737;navitoclax
MGMT	-0.5881996122440569	-0.9158789229946472	0.6223404255319149	0.9720515510732632	1.0	lomeguatrib
SYK	-0.4371657436046522	-0.9193237607291406	0.5395189003436426	0.9690654799472735	1.0	fostamatinib;SYK-inhibitor
IDH2	-0.6928318505073348	-0.919417081163446	0.6218487394957983	0.973360555630162	1.0	AGI-6780
SIRT2	-0.4606298343390458	-0.9219749719272896	0.5360710321864595	0.9724084061791524	1.0	tenovin-6;AGK-2
HDAC1	-0.2726754715979623	-0.9237810125345068	0.5710344827586207	0.9727506119916612	1.0	mocetinostat;NSC-3852
BTK	-0.4343362199803589	-0.925975931546036	0.5228365384615384	0.97239253451299	1.0	LFM-A13;ibrutinib;GDC-0834;CNX-774;AVL-292
PKD2L1	-0.5895375325032726	-0.9262397152122004	0.6116116116116116	0.9763828239367616	1.0	phenamil
HDAC11	-0.51810445129431	-0.9288639936973768	0.5623003194888179	0.9751335897339688	1.0	mocetinostat
CDC25A	-0.6930103847412742	-0.9291339735320224	0.5987903225806451	0.9791943725719646	1.0	NSC-663284
CDC25B	-0.6930103847412742	-0.9291339735320224	0.5987903225806451	0.9791943725719646	1.0	NSC-663284
CYP2F1	-0.6990210372838992	-0.9291769921189638	0.62	0.9885671967103754	1.0	skatole
CLCNKA	-0.7015205165590502	-0.93011634470628	0.6168898043254377	0.9911936253226654	1.0	niflumic-acid
LDLR	-0.701669295087333	-0.9310690723251968	0.6375121477162293	0.9938543892832028	1.0	berberine
CHEK1	-0.4185902813786972	-0.9347847727328948	0.5423312883435583	0.9901671785884426	1.0	AZD-7762;PF-477736
BACE1	-0.6993483500461214	-0.9349018679160188	0.5825242718446602	0.9947763480797076	1.0	compound-w
HMGCR	-0.3467506997686034	-0.9349064424386604	0.5276752767527675	0.9997189484912316	1.0	cerivastatin;benfluorex;pitavastatin
NGFR	-0.7077692147469278	-0.9412528793267396	0.5954045954045954	0.9898293357818492	1.0	Ro-08-2750
NGF	-0.7077692147469278	-0.9412528793267396	0.5954045954045954	0.9898293357818492	1.0	Ro-08-2750
DRD5	-0.3178127565461361	-0.9431749155032024	0.5172855313700384	0.9951700710669938	1.0	ecopipam
ATP2B1	-0.7090487100901598	-0.9453676202571434	0.6001955034213099	0.9951070697337	1.0	calmidazolium
KCNJ5	-0.7142262028744012	-0.9468180996134732	0.5905587668593449	0.996524650250632	1.0	glibenclamide
USP2	-0.7210105037640968	-0.9546277923681504	0.5705705705705706	0.9831471579667004	1.0	NSC-632839
SENP2	-0.7210105037640968	-0.9546277923681504	0.5705705705705706	0.9831471579667004	1.0	NSC-632839
USP7	-0.7210105037640968	-0.9546277923681504	0.5705705705705706	0.9831471579667004	1.0	NSC-632839
USP1	-0.7210105037640968	-0.9546277923681504	0.5705705705705706	0.9831471579667004	1.0	NSC-632839
TACR2	-0.7205641681792484	-0.9550561725107648	0.5593056894889104	1.0	1.0	GR-159897
TAC1	-0.7205641681792484	-0.9550561725107648	0.5593056894889104	1.0	1.0	GR-159897
TOP2B	-0.609529094665777	-0.9558650573360888	0.588865096359743	1.0	1.0	ellipticine
P2RX7	-0.7173803076739965	-0.956594663990036	0.5603190428713859	1.0	1.0	KN-62
CLK1	-0.4177908867869203	-0.9598644509057446	0.489281210592686	1.0	1.0	BRD-K06217810;ML-167;BRD-K68783079;BRD-K59222562
DYRK1A	-0.4177908867869203	-0.9598644509057446	0.489281210592686	1.0	1.0	BRD-K06217810;ML-167;BRD-K68783079;BRD-K59222562
CLK4	-0.4177908867869203	-0.9598644509057446	0.489281210592686	1.0	1.0	BRD-K06217810;ML-167;BRD-K68783079;BRD-K59222562
WASL	-0.7255928824352069	-0.9609881492996774	0.574826560951437	1.0	1.0	wiskostatin
ATR	-0.6126688445158255	-0.9711178057958368	0.5534979423868313	1.0	1.0	VE-821
FLT4	-0.3032442865452134	-0.9747763925250544	0.4657179818887451	1.0	1.0	sunitinib;HMN-214;tivozanib;dovitinib;lucitanib;nintedanib;MAZ-51
HRH1	-0.2253272662223095	-0.977923881322706	0.4975609756097561	0.9992904843697924	1.0	homochlorcyclizine;alimemazine;brompheniramine;terfenadine;chloropyramine;promethazine;azelastine;histamine;mianserin;oxatomide;astemizole;clemastine;loxapine;antazoline;mepyramine;amitriptyline;carbinoxamine;levomequitazine
GBA	-0.4233414738184697	-0.9784077961273138	0.4695550351288056	1.0	1.0	BRD-K88761633;BRD-K08438429
IDE	-0.7392209956259113	-0.9784593384640576	0.5336683417085427	1.0	1.0	bacitracin
GAST	-0.6204413924548506	-0.9800988523091512	0.548728813559322	1.0	1.0	cetraxate
CSNK2A1	-0.5639287890996534	-0.9826822404879654	0.5266015200868621	1.0	1.0	CX-4945;EI-231
[truncated: 176 more rows]

## Sheet: Supplementary Table 11
Supplementary Table 11. Individual-level TWAS results of suicide attempt count.
[truncated: 12,999 more rows]

[truncated: 2 more sheets: Supplementary Table 12, Supplementary Table 13]
